# Supplementary material for: Qualitative microbiome profiling along a wastewater system in Kampala, Uganda
Source: Springer Nature journal article supplement (doi:10.1038/s41598-019-53569-5), 2019-11-22
Supplement: MOESM1 [file 41598_2019_53569_MOESM1_ESM.pdf]

**Supplemental information belonging to:**

**Qualitative microbiome profiling along a wastewater system in Kampala, Uganda**

Pierre H.H. Schneeberger, Samuel Fuhrmann, Sören L. Becker, Joël F. Pothier, Brion Duffy, Christian Beuret, Jürg E. Frey and Jürg Utzinger

**Supplementary Tables**

- **Supplementary Table 1.** Sample metadata and bioinformatics metrics.
- **Supplementary Table 2.** Abundance table of bacterial taxa (GSMer).
- **Supplementary Table 3.** Daily rainfall during the month preceding sample collection.
- **Supplementary Table 4.** Geographical coordinates and abbreviations of collected samples.

**Supplementary Figures**

- **Supplementary Figure 1.** Relations between distance (D) and bacterial composition (BC).

**Supplementary Table 1.** Sample metadata and bioinformatics metrics. This table details the amount of DNA obtained for each sample and the most important metrics generated during the *in silico* analyses. [ ] = concentration; ng = nanogram;  $\mu$ l = microlitre.

| Sample     | [ ] (ng/ $\mu$ l) | total (ng) | nr of queries | nr hits genome-specific database (GSMer) |
|------------|-------------------|------------|---------------|------------------------------------------|
| Channel 1  | 6.92              | 415.2      | 76108948      | 36139                                    |
| Channel 2  | 3.47              | 208.2      | 66389226      | 20326                                    |
| Channel 3  | 1.81              | 108.6      | 60020276      | 18807                                    |
| Channel 4  | 2.02              | 121.2      | 48833748      | 11074                                    |
| Channel 5  | 4.48              | 268.8      | 44912594      | 9333                                     |
| Wetland 1  | 1.78              | 106.8      | 47309246      | 2225                                     |
| Wetland 2  | 7.56              | 453.6      | 54497660      | 831                                      |
| Wetland 3  | 1.77              | 106.2      | 83569972      | 30127                                    |
| Wetland 4  | 6.12              | 367.2      | 58422032      | 365                                      |
| Wetland 6  | 4.84              | 290.4      | 42986736      | 570                                      |
| Wetland 7  | 11.3              | 678        | 58987970      | 4098                                     |
| Wetland 8  | 2.44              | 146.4      | 43258762      | 983                                      |
| Wetland 9  | 2.22              | 133.2      | 44057282      | 820                                      |
| Wetland 10 | 9                 | 540        | 37016806      | 4290                                     |
| Wetland 11 | 19.2              | 1152       | 52543330      | 277                                      |
| Wetland 12 | 18.2              | 1092       | 47822670      | 128                                      |
| Wetland 13 | 4.52              | 271.2      | 43188180      | 16121                                    |
| Wetland 14 | 7.72              | 463.2      | 52635258      | 1617                                     |
| Lake 1     | 3.23              | 193.8      | 139398288     | 40016                                    |
| Lake 2     | 5.8               | 348        | 44112472      | 40130                                    |
| Lake 3     | 3.35              | 201        | 48621746      | 12852                                    |
| Lake 4     | 1.86              | 111.6      | 45562626      | 3796                                     |

**Supplementary Table 3.** Daily rainfall during the month preceding sample collection. Days of sampling are highlighted in bold.

| Day        | Daily rainfall (mm) | Day        | Daily rainfall (mm) |
|------------|---------------------|------------|---------------------|
| 15/08/2013 | 0.5                 | 14/09/2013 | 0.0                 |
| 16/08/2013 | 0.0                 | 15/09/2013 | 20.5                |
| 17/08/2013 | 3.3                 | 16/09/2013 | 0.0                 |
| 18/08/2013 | 0.0                 | 17/09/2013 | N.A                 |
| 19/08/2013 | 0.0                 | 18/09/2013 | 3.0                 |
| 20/08/2013 | 1.2                 | 19/09/2013 | 9.5                 |
| 21/08/2013 | 0.6                 | 20/09/2013 | 0.7                 |
| 22/08/2013 | 0.0                 | 21/09/2013 | 22.5                |
| 23/08/2013 | 0.1                 | 22/09/2013 | 7.0                 |
| 24/08/2013 | 0.0                 | 23/09/2013 | 0.2                 |
| 25/08/2013 | 2.5                 | 24/09/2013 | 0.5                 |
| 26/08/2013 | 0.0                 | 25/09/2013 | 0.0                 |

|            |      |                   |      |
|------------|------|-------------------|------|
| 27/08/2013 | 0.0  | 26/09/2013        | N.A  |
| 28/08/2013 | 0.0  | 27/09/2013        | 0.0  |
| 29/08/2013 | 0.0  | 28/09/2013        | 8.6  |
| 30/08/2013 | 5.4  | 29/09/2013        | 27.5 |
| 31/08/2013 | 27.6 | 30/09/2013        | 15.3 |
| 01/09/2013 | 27.6 | 01/10/2013        | 0.0  |
| 02/09/2013 | 51.9 | 02/10/2013        | 10.6 |
| 03/09/2013 | 4.0  | 03/10/2013        | 2.0  |
| 04/09/2013 | 0.0  | 04/10/2013        | 0.0  |
| 05/09/2013 | 0.0  | 05/10/2013        | 0.0  |
| 06/09/2013 | 0.0  | 06/10/2013        | N.A  |
| 07/09/2013 | 0.3  | 07/10/2013        | 1.8  |
| 08/09/2013 | 37.0 | 08/10/2013        | 0.2  |
| 09/09/2013 | 0.1  | 09/10/2013        | 0.0  |
| 10/09/2013 | 0.6  | 10/10/2013        | 0.6  |
| 11/09/2013 | 0.1  | <b>11/10/2013</b> | 0.3  |
| 12/09/2013 | 0.0  | <b>12/10/2013</b> | 0.0  |
| 13/09/2013 | 0.0  | <b>13/10/2013</b> | 0.0  |

**Supplementary Table 4.** Geographical coordinates and abbreviations of collected samples. This table shows coordinates of sampling locations used in this study and the corresponding abbreviations used in the manuscript.

| <b>Sample name</b> | <b>Abbreviation</b> | <b>Latitude</b> | <b>Longitude</b> |
|--------------------|---------------------|-----------------|------------------|
| Channel 1          | C1                  | 0.318048        | 32.602841        |
| Channel 2          | C2                  | 0.315294        | 32.60931         |
| Channel 3          | C3                  | 0.304312        | 32.619833        |
| Channel 4          | C4                  | 0.298289        | 32.631575        |
| Channel 5          | C5                  | 0.293887        | 32.63647         |
| Lake 1             | L1                  | 0.287377        | 32.639302        |
| Lake 2             | L2                  | 0.286987        | 32.644142        |
| Lake 3             | L3                  | 0.241954        | 32.642259        |
| Lake 4             | L4                  | 0.219695        | 32.638197        |
| Wetland 1          | W1                  | 0.313125        | 32.615092        |
| Wetland 10         | W10                 | 0.293929        | 32.634873        |
| Wetland 11         | W11                 | 0.295019        | 32.636289        |
| Wetland 12         | W12                 | 0.292232        | 32.636585        |
| Wetland 13         | W13                 | 0.303999        | 32.61899         |
| Wetland 14         | W14                 | 0.307199        | 32.632897        |
| Wetland 2          | W2                  | 0.310438        | 32.616108        |
| Wetland 3          | W3                  | 0.305992        | 32.620805        |
| Wetland 4          | W4                  | 0.303986        | 32.623959        |
| Wetland 6          | W6                  | 0.301028        | 32.631979        |
| Wetland 7          | W7                  | 0.29989         | 32.626637        |
| Wetland 8          | W8                  | 0.298867        | 32.628057        |

|           |    |          |           |
|-----------|----|----------|-----------|
| Wetland 9 | W9 | 0.296385 | 32.630572 |
|-----------|----|----------|-----------|

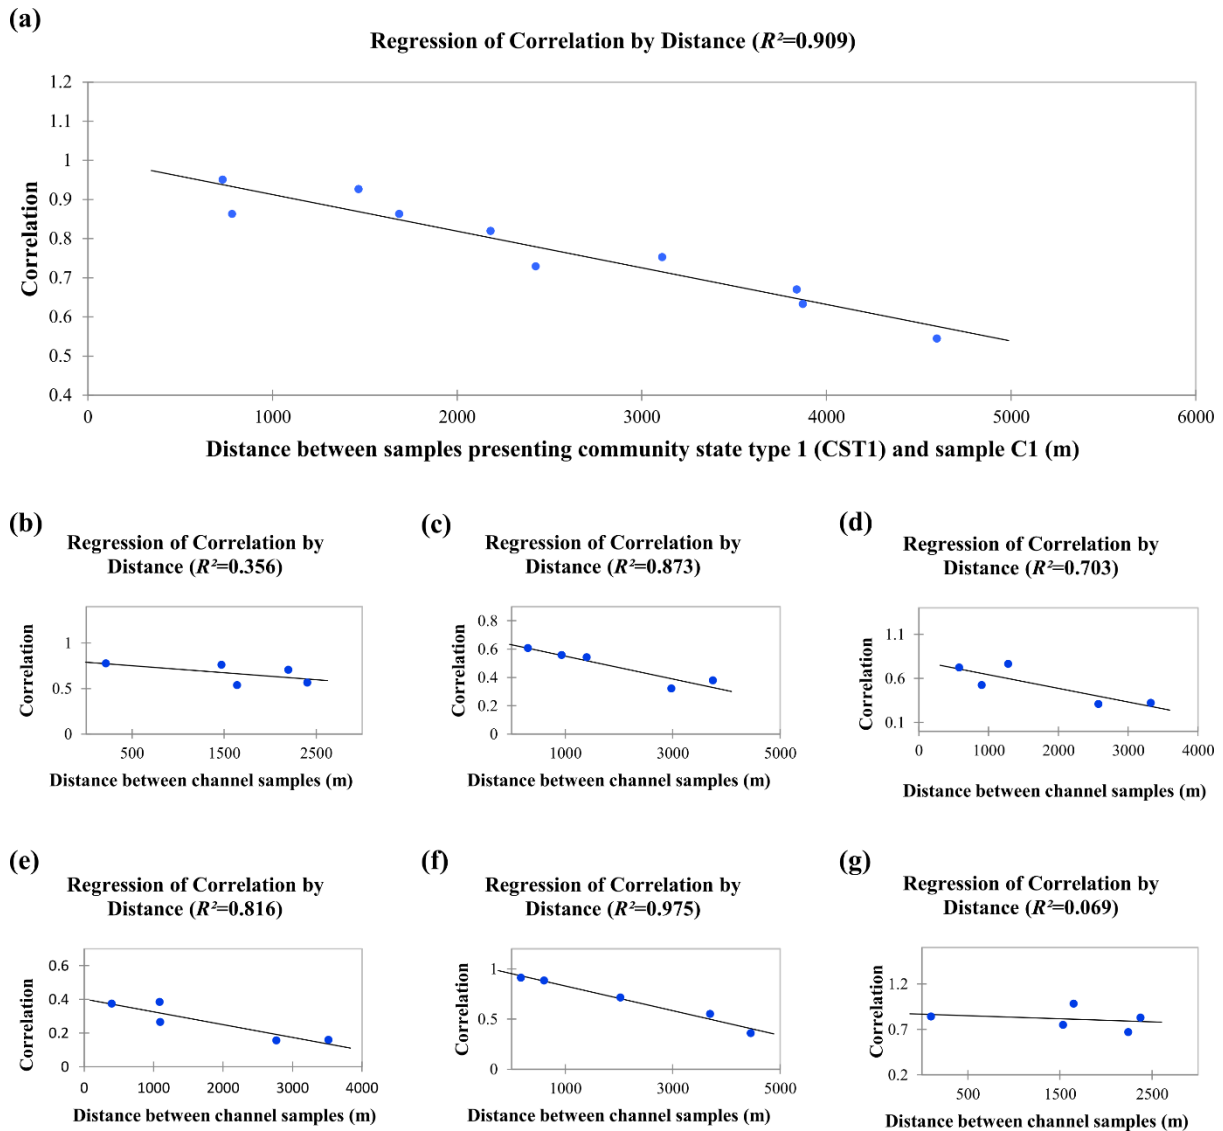

**Supplementary Figure 1.** Relations between distance (D) and bacterial composition (BC). (a) Linear regression analysis of taxonomic correlation and distance between each channel samples. ( $R^2 = 0.909$ ,  $P < 10^{-4}$ ). The taxonomic correlation between samples can be estimated, along the wastewater channel, using the following equation:  $BC = 1.006 - 9.368 \times 10^{-5} \times D$ . (b-g) represent the taxonomic correlation between wetland samples presenting community state type 1 (CST 1) (W3, W6, W7, W8, W10 and W13, respectively) and their distance to the channel samples. A high

$R^2$  indicates that the taxonomic profile is the most closely related to its closest channel sampling location.  $P = 0.29, 0.02, 0.076, 0.035, 0.002$  and  $0.669$ , respectively.
