# Supplementary material for: Qualitative microbiome profiling along a wastewater system in Kampala, Uganda
Source: Sci Rep. 2019 Nov 22;9:17334. doi: 10.1038/s41598-019-53569-5 (PMC6874685; doi:10.1038/s41598-019-53569-5)
Supplement: Supplementary file 2 — Supplementary Table 2 [file 41598_2019_53569_MOESM2_ESM.zip]

Archive with 1 entries (1 files):
- Supplementary_Table_2.xlsx
