# Supplementary material for: Qualitative microbiome profiling along a wastewater system in Kampala, Uganda
Source: Sci Rep. 2019 Nov 22;9:17334. doi: 10.1038/s41598-019-53569-5 (PMC6874685; doi:10.1038/s41598-019-53569-5)
Supplement: Supplementary file 2 — Supplementary Table 2 [file 41598_2019_53569_MOESM2_ESM.zip › Supplementary_Table_2.xlsx]

## Sheet: Supplementary_table_3_Abundance
Supplementary Table 2. Abundance table of bacterial taxa (GSMer).
sample	Channel_1	Channel_2	Channel_3	Channel_4	Channel_5	Wetland_1	Wetland_2	Wetland_3	Wetland_4	Wetland_6	Wetland_7	Wetland_8	Wetland_9	Wetland_10	Wetland_11	Wetland_12	Wetland_13	Wetland_14	Lake_1	Lake_2	Lake_3	Lake_4
Archaea|Crenarchaeota|Thermoprotei|Acidilobales|Acidilobaceae|Acidilobus|Acidilobus saccharovorans|Acidilobus saccharovorans 345-15	0	0	0	0	0	0	0	0	0	0	0	0	0	0	0	0	0	0	0	0	0	0
Archaea|Crenarchaeota|Thermoprotei|Desulfurococcales|Desulfurococcaceae|Aeropyrum|Aeropyrum pernix|Aeropyrum pernix K1	0	0	0	0	0	0	0	0	0	0	0	0	0	0	0	0	0	0	0	0	0	0
Archaea|Crenarchaeota|Thermoprotei|Desulfurococcales|Desulfurococcaceae|Desulfurococcus|Desulfurococcus fermentans|Desulfurococcus fermentans DSM 16532	0	0	0	0	0	0	0	0	0	0	0	0	0	0	0	0	0	0	0	0	0	0
Archaea|Crenarchaeota|Thermoprotei|Desulfurococcales|Desulfurococcaceae|Desulfurococcus|Desulfurococcus kamchatkensis|Desulfurococcus kamchatkensis 1221n	0	0	0	0	0	0	0	0	0	0	0	0	0	0	0	0	0	0	0	0	0	0
Archaea|Crenarchaeota|Thermoprotei|Desulfurococcales|Desulfurococcaceae|Desulfurococcus|Desulfurococcus mucosus|Desulfurococcus mucosus DSM 2162	0	0	0	0	0	0	0	0	0	0	0	0	0	0	0	0	0	0	0	0	0	0
Archaea|Crenarchaeota|Thermoprotei|Desulfurococcales|Desulfurococcaceae|Ignicoccus|Ignicoccus hospitalis|Ignicoccus hospitalis KIN4/I	0	0	0	0	0	0	0	0	0	0	0	0	0	0	0	0	0	0	0	0	0	0
Archaea|Crenarchaeota|Thermoprotei|Desulfurococcales|Desulfurococcaceae|Ignisphaera|Ignisphaera aggregans|Ignisphaera aggregans DSM 17230	0	0	0	0	0	0	0	0	0	0	0	0	0	0	0	0	0	0	0	0	0	0
Archaea|Crenarchaeota|Thermoprotei|Desulfurococcales|Desulfurococcaceae|Staphylothermus|Staphylothermus hellenicus|Staphylothermus hellenicus DSM 12710	0	0	0	0	0	0	0	0	0	0	0	0	0	0	0	0	0	0	0	0	0	0
Archaea|Crenarchaeota|Thermoprotei|Desulfurococcales|Desulfurococcaceae|Staphylothermus|Staphylothermus marinus|Staphylothermus marinus F1	0	0	0	0	0	0	0	0	0	0	0	0	0	0	0	0	0	0	0	0	0	0
Archaea|Crenarchaeota|Thermoprotei|Desulfurococcales|Desulfurococcaceae|Thermogladius|Thermogladius cellulolyticus|Thermogladius cellulolyticus 1633	0	0	0	0	0	0	0	0	0	0	0	0	0	0	0	0	0	0	0	0	0	0
Archaea|Crenarchaeota|Thermoprotei|Desulfurococcales|Desulfurococcaceae|Thermosphaera|Thermosphaera aggregans|Thermosphaera aggregans DSM 11486	0	0	0	0	0	0	0	0	0	0	0	0	0	0	0	0	0	0	0	0	0	0
Archaea|Crenarchaeota|Thermoprotei|Desulfurococcales|Pyrodictiaceae|Hyperthermus|Hyperthermus butylicus|Hyperthermus butylicus DSM 5456	0	0	0	0	0	0	0	0	0	0	0	0	0	0	0	0	0	0	0	0	0	0
Archaea|Crenarchaeota|Thermoprotei|Desulfurococcales|Pyrodictiaceae|Pyrolobus|Pyrolobus fumarii|Pyrolobus fumarii 1A	0	0	0	0	0	0	0	0	0	0	0	0	0	0	0	0	0	0	0	0	0	0
Archaea|Crenarchaeota|Thermoprotei|Fervidicoccales|Fervidicoccaceae|Fervidicoccus|Fervidicoccus fontis|Fervidicoccus fontis Kam940	0	0	0	0	0	0	0	0	0	0	0	0	0	0	0	0	0	0	0	0	0	0
Archaea|Crenarchaeota|Thermoprotei|Sulfolobales|Sulfolobaceae|Acidianus|Acidianus hospitalis|Acidianus hospitalis W1	0	0	0	0	0	0	0	0	0	0	0	0	0	0	0	0	0	0	0	0	0	0
Archaea|Crenarchaeota|Thermoprotei|Sulfolobales|Sulfolobaceae|Metallosphaera|Metallosphaera cuprina|Metallosphaera cuprina Ar-4	0	0	0	0	0	0	0	0	0	0	0	0	0	0	0	0	0	0	0	0	0	0
Archaea|Crenarchaeota|Thermoprotei|Sulfolobales|Sulfolobaceae|Metallosphaera|Metallosphaera sedula|Metallosphaera sedula DSM 5348	0	0	0	0	0	0	0	0	0	0	0	0	0	0	0	0	0	0	0	0	0	0
Archaea|Crenarchaeota|Thermoprotei|Sulfolobales|Sulfolobaceae|Metallosphaera|Metallosphaera yellowstonensis|Metallosphaera yellowstonensis MK1	0	0	0	0	0	0	0	0	0	0	0	0	0	0	0	0	0	0	0	0	0	0
Archaea|Crenarchaeota|Thermoprotei|Sulfolobales|Sulfolobaceae|Sulfolobus|Sulfolobus acidocaldarius|Sulfolobus acidocaldarius DSM 639	0	0	0	0	0	0	0	0	0	0	0	0	0	0	0	0	0	0	0	0	0	0
Archaea|Crenarchaeota|Thermoprotei|Sulfolobales|Sulfolobaceae|Sulfolobus|Sulfolobus islandicus|Sulfolobus islandicus HVE10/4	0	0	0	0	0	0	0	0	0	0	0	0	0	0	0	0	0	0	0	0	0	0
Archaea|Crenarchaeota|Thermoprotei|Sulfolobales|Sulfolobaceae|Sulfolobus|Sulfolobus islandicus|Sulfolobus islandicus L.D.8.5	0	0	0	0	0	0	0	0	0	0	0	0	0	0	0	0	0	0	0	0	0	0
Archaea|Crenarchaeota|Thermoprotei|Sulfolobales|Sulfolobaceae|Sulfolobus|Sulfolobus islandicus|Sulfolobus islandicus L.S.2.15	0	0	0	0	0	0	0	0	0	0	0	0	0	0	0	0	0	0	0	0	0	0
Archaea|Crenarchaeota|Thermoprotei|Sulfolobales|Sulfolobaceae|Sulfolobus|Sulfolobus islandicus|Sulfolobus islandicus M.14.25	0	0	0	0	0	0	0	0	0	0	0	0	0	0	0	0	0	0	0	0	0	0
Archaea|Crenarchaeota|Thermoprotei|Sulfolobales|Sulfolobaceae|Sulfolobus|Sulfolobus islandicus|Sulfolobus islandicus M.16.27	0	0	0	0	0	0	0	0	0	0	0	0	0	0	0	0	0	0	0	0	0	0
Archaea|Crenarchaeota|Thermoprotei|Sulfolobales|Sulfolobaceae|Sulfolobus|Sulfolobus islandicus|Sulfolobus islandicus M.16.4	0	0	0	0	0	0	0	0	0	0	0	0	0	0	0	0	0	0	0	0	0	0
Archaea|Crenarchaeota|Thermoprotei|Sulfolobales|Sulfolobaceae|Sulfolobus|Sulfolobus islandicus|Sulfolobus islandicus REY15A	0	0	0	0	0	0	0	0	0	0	0	0	0	0	0	0	0	0	0	0	0	0
Archaea|Crenarchaeota|Thermoprotei|Sulfolobales|Sulfolobaceae|Sulfolobus|Sulfolobus islandicus|Sulfolobus islandicus Y.G.57.14	0	0	0	0	0	0	0	0	0	0	0	0	0	0	0	0	0	0	0	0	0	0
Archaea|Crenarchaeota|Thermoprotei|Sulfolobales|Sulfolobaceae|Sulfolobus|Sulfolobus islandicus|Sulfolobus islandicus Y.N.15.51	0	0	0	0	0	0	0	0	0	0	0	0	0	0	0	0	0	0	0	0	0	0
Archaea|Crenarchaeota|Thermoprotei|Sulfolobales|Sulfolobaceae|Sulfolobus|Sulfolobus solfataricus|Sulfolobus solfataricus 98/2	0	0	0	0	0	0	0	0	0	0	0	0	0	0	0	0	0	0	0	0	0	0
Archaea|Crenarchaeota|Thermoprotei|Sulfolobales|Sulfolobaceae|Sulfolobus|Sulfolobus solfataricus|Sulfolobus solfataricus P2	0	0	0	0	0	0	0	0	0	0	0	0	0	0	0	0	0	0	0	0	0	0
Archaea|Crenarchaeota|Thermoprotei|Sulfolobales|Sulfolobaceae|Sulfolobus|Sulfolobus tokodaii|Sulfolobus tokodaii str. 7	0	0	0	0	0	0	0	0	0	0	0	0	0	0	0	0	0	0	0	0	0	0
Archaea|Crenarchaeota|Thermoprotei|Thermoproteales|Thermofilaceae|Thermofilum|Thermofilum pendens|Thermofilum pendens Hrk 5	0	0	0	0	0	0	0	0	0	0	0	0	0	0	0	0	0	0	0	0	0	0
Archaea|Crenarchaeota|Thermoprotei|Thermoproteales|Thermoproteaceae|Caldivirga|Caldivirga maquilingensis|Caldivirga maquilingensis IC-167	0	0	0	0	0	0	0	0	0	0	0	0	0	0	0	0	0	0	0	0	0	0
Archaea|Crenarchaeota|Thermoprotei|Thermoproteales|Thermoproteaceae|Pyrobaculum|Pyrobaculum aerophilum|Pyrobaculum aerophilum str. IM2	0	2	0	0	0	0	0	0	0	0	0	0	0	0	0	0	0	0	0	0	0	0
Archaea|Crenarchaeota|Thermoprotei|Thermoproteales|Thermoproteaceae|Pyrobaculum|Pyrobaculum arsenaticum|Pyrobaculum arsenaticum DSM 13514	0	0	0	0	0	0	0	0	0	0	0	0	0	0	0	0	0	0	0	0	0	0
Archaea|Crenarchaeota|Thermoprotei|Thermoproteales|Thermoproteaceae|Pyrobaculum|Pyrobaculum calidifontis|Pyrobaculum calidifontis JCM 11548	0	0	0	0	0	0	0	0	0	0	0	0	0	0	0	0	0	0	0	0	0	0
Archaea|Crenarchaeota|Thermoprotei|Thermoproteales|Thermoproteaceae|Pyrobaculum|Pyrobaculum islandicum|Pyrobaculum islandicum DSM 4184	0	0	0	0	0	0	0	0	0	0	0	0	0	0	0	0	0	0	0	0	0	0
Archaea|Crenarchaeota|Thermoprotei|Thermoproteales|Thermoproteaceae|Pyrobaculum|Pyrobaculum neutrophilum|Pyrobaculum neutrophilum V24Sta	0	0	0	0	0	0	0	0	0	0	0	0	0	0	0	0	0	0	0	0	0	0
Archaea|Crenarchaeota|Thermoprotei|Thermoproteales|Thermoproteaceae|Pyrobaculum|Pyrobaculum oguniense|Pyrobaculum oguniense TE7	0	0	0	0	0	0	0	0	0	0	0	0	0	0	0	0	0	0	0	0	0	0
Archaea|Crenarchaeota|Thermoprotei|Thermoproteales|Thermoproteaceae|Pyrobaculum|Pyrobaculum sp. 1860	0	0	0	0	0	0	0	0	0	0	0	0	0	0	0	0	0	0	0	0	0	0
Archaea|Crenarchaeota|Thermoprotei|Thermoproteales|Thermoproteaceae|Thermoproteus|Thermoproteus tenax|Thermoproteus tenax Kra 1	0	0	0	0	0	0	0	0	0	0	0	0	0	0	0	0	0	0	0	0	0	0
Archaea|Crenarchaeota|Thermoprotei|Thermoproteales|Thermoproteaceae|Thermoproteus|Thermoproteus uzoniensis|Thermoproteus uzoniensis 768-20	0	0	0	0	0	0	0	0	0	0	0	0	0	0	0	0	0	0	0	0	0	0
Archaea|Crenarchaeota|Thermoprotei|Thermoproteales|Thermoproteaceae|Vulcanisaeta|Vulcanisaeta distributa|Vulcanisaeta distributa DSM 14429	0	0	0	0	0	0	0	0	0	0	0	0	0	0	0	0	0	0	0	0	0	0
Archaea|Crenarchaeota|Thermoprotei|Thermoproteales|Thermoproteaceae|Vulcanisaeta|Vulcanisaeta moutnovskia|Vulcanisaeta moutnovskia 768-28	0	0	0	0	0	0	0	0	0	0	0	0	0	0	0	0	0	0	0	0	0	0
Archaea|Euryarchaeota|Archaeoglobi|Archaeoglobales|Archaeoglobaceae|Archaeoglobus|Archaeoglobus fulgidus|Archaeoglobus fulgidus DSM 4304	0	0	0	0	0	0	0	0	0	0	0	0	0	0	0	0	0	0	0	0	0	0
Archaea|Euryarchaeota|Archaeoglobi|Archaeoglobales|Archaeoglobaceae|Archaeoglobus|Archaeoglobus profundus|Archaeoglobus profundus DSM 5631	0	0	0	0	0	0	0	0	0	0	0	0	0	0	0	0	0	0	0	0	0	0
Archaea|Euryarchaeota|Archaeoglobi|Archaeoglobales|Archaeoglobaceae|Archaeoglobus|Archaeoglobus veneficus|Archaeoglobus veneficus SNP6	0	0	0	0	0	0	0	0	0	0	0	0	0	0	0	0	0	0	0	0	0	0
Archaea|Euryarchaeota|Archaeoglobi|Archaeoglobales|Archaeoglobaceae|Ferroglobus|Ferroglobus placidus|Ferroglobus placidus DSM 10642	0	0	0	0	0	0	0	0	0	0	0	0	0	0	0	0	0	0	0	0	0	0
Archaea|Euryarchaeota|Halobacteria|Halobacteriales|Halobacteriaceae|Haladaptatus|Haladaptatus paucihalophilus|Haladaptatus paucihalophilus DX253	0	0	0	0	0	0	0	0	0	0	0	0	0	0	0	0	0	0	0	0	0	0
Archaea|Euryarchaeota|Halobacteria|Halobacteriales|Halobacteriaceae|Halalkalicoccus|Halalkalicoccus jeotgali|Halalkalicoccus jeotgali B3	0	0	0	0	1	0	0	0	0	0	0	0	0	0	0	0	0	0	0	0	0	0
Archaea|Euryarchaeota|Halobacteria|Halobacteriales|Halobacteriaceae|Haloarcula|Haloarcula hispanica|Haloarcula hispanica ATCC 33960	0	0	0	0	0	0	0	0	0	0	0	0	0	0	0	0	0	0	0	0	0	0
Archaea|Euryarchaeota|Halobacteria|Halobacteriales|Halobacteriaceae|Haloarcula|Haloarcula marismortui|Haloarcula marismortui ATCC 43049	0	0	0	0	0	0	0	0	0	0	0	0	0	0	0	0	0	0	0	0	0	0
Archaea|Euryarchaeota|Halobacteria|Halobacteriales|Halobacteriaceae|Halobacterium|Halobacterium salinarum|Halobacterium salinarum R1	0	0	0	0	0	0	0	0	0	0	0	0	0	0	0	0	0	0	0	0	0	0
Archaea|Euryarchaeota|Halobacteria|Halobacteriales|Halobacteriaceae|Halobacterium|Halobacterium salinarum|Halobacterium sp. NRC-1	0	0	0	0	0	0	0	0	0	0	0	0	0	0	0	0	0	0	0	0	0	0
Archaea|Euryarchaeota|Halobacteria|Halobacteriales|Halobacteriaceae|Halobacterium|Halobacterium sp. DL1	0	0	0	0	0	0	0	0	0	0	0	0	0	0	0	0	0	0	0	0	0	0
Archaea|Euryarchaeota|Halobacteria|Halobacteriales|Halobacteriaceae|Halobiforma|Halobiforma lacisalsi|Halobiforma lacisalsi AJ5	0	0	0	0	0	0	0	0	0	0	0	0	0	0	0	0	0	0	0	0	0	0
Archaea|Euryarchaeota|Halobacteria|Halobacteriales|Halobacteriaceae|Haloferax|Haloferax mediterranei|Haloferax mediterranei ATCC 33500	0	0	0	0	0	0	0	0	0	0	0	0	0	0	0	0	0	0	0	0	0	0
Archaea|Euryarchaeota|Halobacteria|Halobacteriales|Halobacteriaceae|Haloferax|Haloferax volcanii|Haloferax volcanii DS2	0	0	0	0	0	0	0	0	0	0	0	0	0	0	0	0	0	0	0	0	0	0
Archaea|Euryarchaeota|Halobacteria|Halobacteriales|Halobacteriaceae|Halogeometricum|Halogeometricum borinquense|Halogeometricum borinquense DSM 11551	0	0	0	0	0	0	0	0	0	0	0	0	0	0	0	0	0	0	0	0	0	0
Archaea|Euryarchaeota|Halobacteria|Halobacteriales|Halobacteriaceae|Halomicrobium|Halomicrobium mukohataei|Halomicrobium mukohataei DSM 12286	0	0	0	0	0	0	0	0	0	0	0	0	0	0	0	0	0	0	0	0	0	0
Archaea|Euryarchaeota|Halobacteria|Halobacteriales|Halobacteriaceae|Halopiger|Halopiger xanaduensis|Halopiger xanaduensis SH-6	0	0	0	0	0	0	0	0	0	0	0	0	0	0	0	0	0	0	0	0	0	0
Archaea|Euryarchaeota|Halobacteria|Halobacteriales|Halobacteriaceae|Haloquadratum|Haloquadratum walsbyi|Haloquadratum walsbyi C23	0	0	0	0	0	0	0	0	0	0	0	0	0	0	0	0	0	0	0	0	0	0
Archaea|Euryarchaeota|Halobacteria|Halobacteriales|Halobacteriaceae|Haloquadratum|Haloquadratum walsbyi|Haloquadratum walsbyi DSM 16790	0	0	0	0	0	0	0	0	0	0	0	0	0	0	0	0	0	0	0	0	0	0
Archaea|Euryarchaeota|Halobacteria|Halobacteriales|Halobacteriaceae|Halorhabdus|Halorhabdus tiamatea|Halorhabdus tiamatea SARL4B	0	0	0	0	0	0	0	0	0	0	0	0	0	0	0	0	0	0	0	0	0	0
Archaea|Euryarchaeota|Halobacteria|Halobacteriales|Halobacteriaceae|Halorhabdus|Halorhabdus utahensis|Halorhabdus utahensis DSM 12940	0	0	0	0	0	0	0	0	0	0	0	0	0	0	0	0	0	0	0	0	0	0
Archaea|Euryarchaeota|Halobacteria|Halobacteriales|Halobacteriaceae|Halorubrum|Halorubrum lacusprofundi|Halorubrum lacusprofundi ATCC 49239	0	0	0	0	0	0	0	0	0	0	0	0	0	0	0	0	0	0	0	0	0	0
Archaea|Euryarchaeota|Halobacteria|Halobacteriales|Halobacteriaceae|Haloterrigena|Haloterrigena turkmenica|Haloterrigena turkmenica DSM 5511	0	0	0	0	0	0	0	0	0	0	0	0	0	0	0	0	0	0	0	0	0	0
Archaea|Euryarchaeota|Halobacteria|Halobacteriales|Halobacteriaceae|Natrialba|Natrialba magadii|Natrialba magadii ATCC 43099	0	0	0	0	0	0	0	0	0	0	0	0	0	0	0	0	1	0	0	0	0	0
Archaea|Euryarchaeota|Halobacteria|Halobacteriales|Halobacteriaceae|Natrinema|Natrinema pellirubrum|Natrinema pellirubrum DSM 15624	0	0	0	0	0	0	0	0	0	0	0	0	0	0	0	0	0	0	0	0	0	0
Archaea|Euryarchaeota|Halobacteria|Halobacteriales|Halobacteriaceae|Natrinema|Natrinema sp. J7-2	0	0	0	0	0	0	0	0	0	0	0	0	0	0	0	0	0	0	0	0	0	0
Archaea|Euryarchaeota|Halobacteria|Halobacteriales|Halobacteriaceae|Natronobacterium|Natronobacterium gregoryi|Natronobacterium gregoryi SP2	0	0	0	0	0	0	0	0	0	0	0	0	0	0	0	0	0	0	0	0	0	0
Archaea|Euryarchaeota|Halobacteria|Halobacteriales|Halobacteriaceae|Natronomonas|Natronomonas pharaonis|Natronomonas pharaonis DSM 2160	0	0	0	0	0	0	0	0	0	0	0	0	0	0	0	0	0	0	0	0	0	0
Archaea|Euryarchaeota|Methanobacteria|Methanobacteriales|Methanobacteriaceae|Methanobacterium|Methanobacterium lacus	0	0	0	0	0	0	0	0	0	0	0	0	0	0	0	0	0	0	0	0	0	0
Archaea|Euryarchaeota|Methanobacteria|Methanobacteriales|Methanobacteriaceae|Methanobacterium|Methanobacterium paludis	0	0	0	0	0	0	0	0	0	0	0	0	0	0	0	0	0	0	0	0	0	0
Archaea|Euryarchaeota|Methanobacteria|Methanobacteriales|Methanobacteriaceae|Methanobrevibacter|Methanobrevibacter ruminantium|Methanobrevibacter ruminantium M1	0	3	2	1	0	0	0	0	0	0	1	0	0	1	0	0	2	0	0	0	0	0
Archaea|Euryarchaeota|Methanobacteria|Methanobacteriales|Methanobacteriaceae|Methanobrevibacter|Methanobrevibacter smithii|Methanobrevibacter smithii ATCC 35061	59	27	33	17	6	0	0	81	0	0	0	1	0	0	0	0	25	1	2	1	0	1
Archaea|Euryarchaeota|Methanobacteria|Methanobacteriales|Methanobacteriaceae|Methanobrevibacter|Methanobrevibacter smithii|Methanobrevibacter smithii DSM 2374	17	17	14	8	7	0	0	20	0	0	0	0	0	2	0	0	7	0	0	1	0	0
Archaea|Euryarchaeota|Methanobacteria|Methanobacteriales|Methanobacteriaceae|Methanobrevibacter|Methanobrevibacter smithii|Methanobrevibacter smithii DSM 2375	51	28	46	24	12	0	0	89	0	0	0	0	1	0	0	0	26	0	0	0	0	0
Archaea|Euryarchaeota|Methanobacteria|Methanobacteriales|Methanobacteriaceae|Methanobrevibacter|Methanobrevibacter smithii|Methanobrevibacter smithii TS145A	0	0	0	0	0	0	0	0	0	0	0	0	0	0	0	0	0	0	0	0	0	0
Archaea|Euryarchaeota|Methanobacteria|Methanobacteriales|Methanobacteriaceae|Methanobrevibacter|Methanobrevibacter smithii|Methanobrevibacter smithii TS145B	0	0	0	0	0	0	0	0	0	0	0	0	0	0	0	0	0	0	0	0	0	0
Archaea|Euryarchaeota|Methanobacteria|Methanobacteriales|Methanobacteriaceae|Methanobrevibacter|Methanobrevibacter smithii|Methanobrevibacter smithii TS146A	2	0	0	0	2	0	0	1	0	0	0	0	0	1	0	0	1	0	0	0	0	0
Archaea|Euryarchaeota|Methanobacteria|Methanobacteriales|Methanobacteriaceae|Methanobrevibacter|Methanobrevibacter smithii|Methanobrevibacter smithii TS146B	0	0	0	0	0	0	0	0	0	0	0	0	0	0	0	0	0	0	0	0	0	0
Archaea|Euryarchaeota|Methanobacteria|Methanobacteriales|Methanobacteriaceae|Methanobrevibacter|Methanobrevibacter smithii|Methanobrevibacter smithii TS146C	0	0	0	0	0	0	0	0	0	0	0	0	0	0	0	0	0	0	0	0	0	0
Archaea|Euryarchaeota|Methanobacteria|Methanobacteriales|Methanobacteriaceae|Methanobrevibacter|Methanobrevibacter smithii|Methanobrevibacter smithii TS146D	0	0	0	0	0	0	0	0	0	0	0	0	0	0	0	0	0	0	0	0	0	0
Archaea|Euryarchaeota|Methanobacteria|Methanobacteriales|Methanobacteriaceae|Methanobrevibacter|Methanobrevibacter smithii|Methanobrevibacter smithii TS146E	0	0	0	0	0	0	0	0	0	0	0	0	0	0	0	0	0	0	0	0	0	0
Archaea|Euryarchaeota|Methanobacteria|Methanobacteriales|Methanobacteriaceae|Methanobrevibacter|Methanobrevibacter smithii|Methanobrevibacter smithii TS147A	0	0	0	0	0	0	0	0	0	0	0	0	0	0	0	0	0	0	0	0	0	0
Archaea|Euryarchaeota|Methanobacteria|Methanobacteriales|Methanobacteriaceae|Methanobrevibacter|Methanobrevibacter smithii|Methanobrevibacter smithii TS147B	0	0	0	0	0	0	0	0	0	0	0	0	0	0	0	0	0	0	0	0	0	0
Archaea|Euryarchaeota|Methanobacteria|Methanobacteriales|Methanobacteriaceae|Methanobrevibacter|Methanobrevibacter smithii|Methanobrevibacter smithii TS147C	0	0	0	0	0	0	0	0	0	0	0	0	0	0	0	0	0	0	0	0	0	0
Archaea|Euryarchaeota|Methanobacteria|Methanobacteriales|Methanobacteriaceae|Methanobrevibacter|Methanobrevibacter smithii|Methanobrevibacter smithii TS94A	0	0	0	0	0	0	0	0	0	0	0	0	0	0	0	0	0	0	0	0	0	0
Archaea|Euryarchaeota|Methanobacteria|Methanobacteriales|Methanobacteriaceae|Methanobrevibacter|Methanobrevibacter smithii|Methanobrevibacter smithii TS94B	0	0	0	0	0	0	0	0	0	0	0	0	0	0	0	0	0	0	0	0	0	0
Archaea|Euryarchaeota|Methanobacteria|Methanobacteriales|Methanobacteriaceae|Methanobrevibacter|Methanobrevibacter smithii|Methanobrevibacter smithii TS94C	0	0	0	0	0	0	0	0	0	0	0	0	0	0	0	0	0	0	0	0	0	0
Archaea|Euryarchaeota|Methanobacteria|Methanobacteriales|Methanobacteriaceae|Methanobrevibacter|Methanobrevibacter smithii|Methanobrevibacter smithii TS95A	0	0	0	0	0	0	0	0	0	0	0	0	0	0	0	0	0	0	0	0	0	0
Archaea|Euryarchaeota|Methanobacteria|Methanobacteriales|Methanobacteriaceae|Methanobrevibacter|Methanobrevibacter smithii|Methanobrevibacter smithii TS95B	0	0	0	0	0	0	0	0	0	0	0	0	0	0	0	0	0	0	0	0	0	0
Archaea|Euryarchaeota|Methanobacteria|Methanobacteriales|Methanobacteriaceae|Methanobrevibacter|Methanobrevibacter smithii|Methanobrevibacter smithii TS95C	0	0	0	0	0	0	0	0	0	0	0	0	0	0	0	0	0	0	0	0	0	0
Archaea|Euryarchaeota|Methanobacteria|Methanobacteriales|Methanobacteriaceae|Methanobrevibacter|Methanobrevibacter smithii|Methanobrevibacter smithii TS95D	0	0	0	0	0	0	0	0	0	0	0	0	0	0	0	0	0	0	0	0	0	0
Archaea|Euryarchaeota|Methanobacteria|Methanobacteriales|Methanobacteriaceae|Methanobrevibacter|Methanobrevibacter smithii|Methanobrevibacter smithii TS96A	0	0	0	0	0	0	0	0	0	0	0	0	0	0	0	0	0	0	0	0	0	0
Archaea|Euryarchaeota|Methanobacteria|Methanobacteriales|Methanobacteriaceae|Methanobrevibacter|Methanobrevibacter smithii|Methanobrevibacter smithii TS96B	0	0	0	0	0	0	0	0	0	0	0	0	0	0	0	0	0	0	0	0	0	0
Archaea|Euryarchaeota|Methanobacteria|Methanobacteriales|Methanobacteriaceae|Methanobrevibacter|Methanobrevibacter smithii|Methanobrevibacter smithii TS96C	0	0	0	0	0	0	0	0	0	0	0	0	0	0	0	0	0	0	0	0	0	0
Archaea|Euryarchaeota|Methanobacteria|Methanobacteriales|Methanobacteriaceae|Methanosphaera|Methanosphaera stadtmanae|Methanosphaera stadtmanae DSM 3091	33	38	34	10	8	0	0	43	0	0	0	0	1	2	0	0	23	0	1	0	0	0
Archaea|Euryarchaeota|Methanobacteria|Methanobacteriales|Methanobacteriaceae|Methanothermobacter|Methanothermobacter marburgensis|Methanothermobacter marburgensis str. Marburg	1	0	0	0	0	0	0	0	0	0	0	0	0	0	0	0	0	0	0	0	0	0
Archaea|Euryarchaeota|Methanobacteria|Methanobacteriales|Methanobacteriaceae|Methanothermobacter|Methanothermobacter thermautotrophicus|Methanothermobacter thermautotrophicus str. Delta H	0	0	0	0	0	0	0	0	0	0	0	0	0	0	0	0	0	0	0	0	0	0
Archaea|Euryarchaeota|Methanobacteria|Methanobacteriales|Methanothermaceae|Methanothermus|Methanothermus fervidus|Methanothermus fervidus DSM 2088	0	0	0	0	0	0	0	0	0	0	0	0	0	0	0	0	0	0	0	0	0	0
Archaea|Euryarchaeota|Methanococci|Methanococcales|Methanocaldococcaceae|Methanocaldococcus|Methanocaldococcus fervens|Methanocaldococcus fervens AG86	0	0	0	0	0	0	0	0	0	0	0	0	0	0	0	0	0	0	0	0	0	0
Archaea|Euryarchaeota|Methanococci|Methanococcales|Methanocaldococcaceae|Methanocaldococcus|Methanocaldococcus infernus|Methanocaldococcus infernus ME	0	0	0	0	0	0	0	0	0	0	0	0	0	0	0	0	0	0	0	0	0	0
Archaea|Euryarchaeota|Methanococci|Methanococcales|Methanocaldococcaceae|Methanocaldococcus|Methanocaldococcus jannaschii|Methanocaldococcus jannaschii DSM 2661	0	0	0	0	0	0	0	0	0	0	0	0	0	0	0	0	0	0	0	0	0	0
Archaea|Euryarchaeota|Methanococci|Methanococcales|Methanocaldococcaceae|Methanocaldococcus|Methanocaldococcus sp. FS406-22	0	0	0	0	0	0	0	0	0	0	0	0	0	0	0	0	0	0	0	0	0	0
Archaea|Euryarchaeota|Methanococci|Methanococcales|Methanocaldococcaceae|Methanocaldococcus|Methanocaldococcus vulcanius|Methanocaldococcus vulcanius M7	0	0	0	0	0	0	0	0	0	0	0	0	0	0	0	0	0	0	0	0	0	0
Archaea|Euryarchaeota|Methanococci|Methanococcales|Methanocaldococcaceae|Methanotorris|Methanotorris formicicus|Methanotorris formicicus Mc-S-70	0	0	0	0	0	0	0	0	0	0	0	0	0	0	0	0	0	0	0	0	0	0
Archaea|Euryarchaeota|Methanococci|Methanococcales|Methanocaldococcaceae|Methanotorris|Methanotorris igneus|Methanotorris igneus Kol 5	0	0	0	0	0	0	0	0	0	0	0	0	0	0	0	0	0	0	0	0	0	0
Archaea|Euryarchaeota|Methanococci|Methanococcales|Methanococcaceae|Methanococcus|Methanococcus aeolicus|Methanococcus aeolicus Nankai-3	0	0	0	0	0	0	0	0	0	0	0	0	0	0	0	0	0	0	0	0	0	0
Archaea|Euryarchaeota|Methanococci|Methanococcales|Methanococcaceae|Methanococcus|Methanococcus maripaludis|Methanococcus maripaludis C5	0	0	0	0	0	0	0	0	0	0	0	0	0	0	0	0	0	0	0	0	0	0
Archaea|Euryarchaeota|Methanococci|Methanococcales|Methanococcaceae|Methanococcus|Methanococcus maripaludis|Methanococcus maripaludis C6	0	0	0	0	0	0	0	0	0	0	0	0	0	0	0	0	0	0	0	0	0	0
Archaea|Euryarchaeota|Methanococci|Methanococcales|Methanococcaceae|Methanococcus|Methanococcus maripaludis|Methanococcus maripaludis C7	0	0	0	0	0	0	0	0	0	0	0	0	0	0	0	0	0	0	0	0	0	0
Archaea|Euryarchaeota|Methanococci|Methanococcales|Methanococcaceae|Methanococcus|Methanococcus maripaludis|Methanococcus maripaludis S2	0	0	0	0	0	0	0	0	0	0	0	0	0	0	0	0	0	0	0	0	0	0
Archaea|Euryarchaeota|Methanococci|Methanococcales|Methanococcaceae|Methanococcus|Methanococcus maripaludis|Methanococcus maripaludis X1	0	0	0	0	0	0	0	0	0	0	0	0	0	0	0	0	0	0	0	0	0	0
Archaea|Euryarchaeota|Methanococci|Methanococcales|Methanococcaceae|Methanococcus|Methanococcus vannielii|Methanococcus vannielii SB	0	0	0	0	0	0	0	0	0	0	0	0	0	0	0	0	0	0	0	0	0	0
Archaea|Euryarchaeota|Methanococci|Methanococcales|Methanococcaceae|Methanococcus|Methanococcus voltae|Methanococcus voltae A3	0	0	0	0	0	0	0	0	0	0	0	0	0	0	0	0	0	0	0	0	0	0
Archaea|Euryarchaeota|Methanococci|Methanococcales|Methanococcaceae|Methanothermococcus|Methanothermococcus okinawensis|Methanothermococcus okinawensis IH1	0	0	0	0	0	0	0	0	0	0	0	0	0	0	0	0	0	0	0	0	0	0
Archaea|Euryarchaeota|Methanomicrobia|Methanocellales|Methanocellaceae|Methanocella|Methanocella arvoryzae|Methanocella arvoryzae MRE50	0	0	0	0	0	0	0	0	0	0	0	0	0	0	0	0	0	0	0	0	0	0
Archaea|Euryarchaeota|Methanomicrobia|Methanocellales|Methanocellaceae|Methanocella|Methanocella conradii|Methanocella conradii HZ254	0	0	0	0	0	0	0	0	0	0	0	0	0	0	0	0	0	0	0	0	0	0
Archaea|Euryarchaeota|Methanomicrobia|Methanocellales|Methanocellaceae|Methanocella|Methanocella paludicola|Methanocella paludicola SANAE	0	0	0	0	0	0	0	0	0	0	0	0	1	0	0	0	0	0	0	0	0	0
Archaea|Euryarchaeota|Methanomicrobia|Methanomicrobiales|Methanocorpusculaceae|Methanocorpusculum|Methanocorpusculum labreanum|Methanocorpusculum labreanum Z	3	0	0	2	5	0	0	0	0	0	3	0	0	2	0	0	0	1	2	0	0	0
Archaea|Euryarchaeota|Methanomicrobia|Methanomicrobiales|Methanomicrobiaceae|Methanoculleus|Methanoculleus bourgensis|Methanoculleus bourgensis MS2	0	4	2	3	1	0	0	0	0	0	0	0	0	0	0	0	2	0	0	0	0	0
Archaea|Euryarchaeota|Methanomicrobia|Methanomicrobiales|Methanomicrobiaceae|Methanoculleus|Methanoculleus marisnigri|Methanoculleus marisnigri JR1	0	0	1	0	0	0	0	0	0	0	0	0	0	0	0	0	0	0	0	0	0	0
Archaea|Euryarchaeota|Methanomicrobia|Methanomicrobiales|Methanomicrobiaceae|Methanoplanus|Methanoplanus limicola|Methanoplanus limicola DSM 2279	0	0	0	0	0	0	0	0	0	0	0	0	0	0	0	0	0	0	0	0	0	0
Archaea|Euryarchaeota|Methanomicrobia|Methanomicrobiales|Methanomicrobiaceae|Methanoplanus|Methanoplanus petrolearius|Methanoplanus petrolearius DSM 11571	0	0	0	0	0	0	0	0	0	0	0	0	0	0	0	0	0	0	0	0	0	0
Archaea|Euryarchaeota|Methanomicrobia|Methanomicrobiales|Methanoregulaceae|Methanolinea|Methanolinea tarda|Methanolinea tarda NOBI-1	0	0	0	0	0	0	0	0	0	0	1	0	1	0	0	0	0	0	1	0	0	0
Archaea|Euryarchaeota|Methanomicrobia|Methanomicrobiales|Methanoregulaceae|Methanoregula|Methanoregula boonei|Methanoregula boonei 6A8	0	0	0	0	0	0	0	0	0	0	0	0	0	0	0	0	0	0	0	0	0	0
Archaea|Euryarchaeota|Methanomicrobia|Methanomicrobiales|Methanoregulaceae|Methanosphaerula|Methanosphaerula palustris|Methanosphaerula palustris E1-9c	0	0	0	0	0	0	0	0	0	0	0	0	0	0	0	0	0	0	0	0	0	0
Archaea|Euryarchaeota|Methanomicrobia|Methanomicrobiales|Methanospirillaceae|Methanospirillum|Methanospirillum hungatei|Methanospirillum hungatei JF-1	0	6	8	2	2	0	1	1	0	0	1	1	0	2	0	0	8	0	1	0	0	0
Archaea|Euryarchaeota|Methanomicrobia|Methanosarcinales|Methanosaetaceae|Methanosaeta|Methanosaeta concilii|Methanosaeta concilii GP6	319	1519	1116	617	490	70	26	132	3	2	90	11	16	335	7	3	1189	18	54	13	0	2
Archaea|Euryarchaeota|Methanomicrobia|Methanosarcinales|Methanosaetaceae|Methanosaeta|Methanosaeta harundinacea|Methanosaeta harundinacea 6Ac	0	1	0	0	1	0	0	0	0	0	0	0	0	0	0	0	0	0	0	0	0	0
Archaea|Euryarchaeota|Methanomicrobia|Methanosarcinales|Methanosaetaceae|Methanosaeta|Methanosaeta thermophila|Methanosaeta thermophila PT	0	0	0	0	0	0	0	0	0	0	0	0	0	0	0	0	0	0	0	0	0	0
Archaea|Euryarchaeota|Methanomicrobia|Methanosarcinales|Methanosarcinaceae|Methanococcoides|Methanococcoides burtonii|Methanococcoides burtonii DSM 6242	0	0	0	0	0	0	0	0	0	0	0	0	0	0	0	0	0	0	0	0	0	0
Archaea|Euryarchaeota|Methanomicrobia|Methanosarcinales|Methanosarcinaceae|Methanohalobium|Methanohalobium evestigatum|Methanohalobium evestigatum Z-7303	0	0	0	0	0	0	0	0	0	0	0	0	0	0	0	0	0	0	0	0	0	0
Archaea|Euryarchaeota|Methanomicrobia|Methanosarcinales|Methanosarcinaceae|Methanohalophilus|Methanohalophilus mahii|Methanohalophilus mahii DSM 5219	0	0	0	0	0	0	0	0	0	0	0	0	0	0	0	0	0	0	0	0	0	0
Archaea|Euryarchaeota|Methanomicrobia|Methanosarcinales|Methanosarcinaceae|Methanosalsum|Methanosalsum zhilinae|Methanosalsum zhilinae DSM 4017	0	0	0	0	0	0	0	0	0	0	0	0	0	0	0	0	0	0	0	0	0	0
Archaea|Euryarchaeota|Methanomicrobia|Methanosarcinales|Methanosarcinaceae|Methanosarcina|Methanosarcina acetivorans|Methanosarcina acetivorans C2A	0	0	0	0	0	0	0	0	0	0	0	0	0	0	0	0	0	0	0	0	0	0
Archaea|Euryarchaeota|Methanomicrobia|Methanosarcinales|Methanosarcinaceae|Methanosarcina|Methanosarcina barkeri|Methanosarcina barkeri str. Fusaro	7	4	1	9	4	2	0	19	0	0	3	3	0	10	0	0	3	1	1	0	0	0
Archaea|Euryarchaeota|Methanomicrobia|Methanosarcinales|Methanosarcinaceae|Methanosarcina|Methanosarcina mazei|Methanosarcina mazei Go1	80	145	94	87	85	3	0	54	0	1	11	1	0	26	0	0	89	4	7	1	0	1
Archaea|Euryarchaeota|Methanopyri|Methanopyrales|Methanopyraceae|Methanopyrus|Methanopyrus kandleri|Methanopyrus kandleri AV19	0	0	0	0	0	0	0	0	0	0	0	0	0	0	0	0	0	0	0	0	0	0
Archaea|Euryarchaeota|Thermococci|Thermococcales|Thermococcaceae|Pyrococcus|Pyrococcus abyssi|Pyrococcus abyssi GE5	0	0	0	0	0	0	0	0	0	0	0	0	0	0	0	0	0	0	0	0	0	0
Archaea|Euryarchaeota|Thermococci|Thermococcales|Thermococcaceae|Pyrococcus|Pyrococcus furiosus|Pyrococcus furiosus COM1	0	0	0	0	0	0	0	0	0	0	0	0	0	0	0	0	0	0	0	0	0	0
Archaea|Euryarchaeota|Thermococci|Thermococcales|Thermococcaceae|Pyrococcus|Pyrococcus furiosus|Pyrococcus furiosus DSM 3638	0	0	0	0	0	0	0	0	0	0	0	0	0	0	0	0	0	0	0	0	0	0
Archaea|Euryarchaeota|Thermococci|Thermococcales|Thermococcaceae|Pyrococcus|Pyrococcus horikoshii|Pyrococcus horikoshii OT3	0	0	0	0	0	0	0	0	0	0	0	0	0	0	0	0	0	0	0	0	0	0
Archaea|Euryarchaeota|Thermococci|Thermococcales|Thermococcaceae|Pyrococcus|Pyrococcus sp. NA2	0	0	0	0	0	0	0	0	0	0	0	0	0	0	0	0	0	0	0	0	0	0
Archaea|Euryarchaeota|Thermococci|Thermococcales|Thermococcaceae|Pyrococcus|Pyrococcus sp. ST04	0	0	0	0	0	0	0	0	0	0	0	0	0	0	0	0	0	0	0	0	0	0
Archaea|Euryarchaeota|Thermococci|Thermococcales|Thermococcaceae|Pyrococcus|Pyrococcus yayanosii|Pyrococcus yayanosii CH1	0	0	0	0	0	0	0	0	0	0	0	0	0	0	0	0	0	0	0	0	0	0
Archaea|Euryarchaeota|Thermococci|Thermococcales|Thermococcaceae|Thermococcus|Thermococcus barophilus|Thermococcus barophilus MP	0	0	0	0	0	0	0	0	0	0	0	0	0	0	0	0	0	0	0	0	0	0
Archaea|Euryarchaeota|Thermococci|Thermococcales|Thermococcaceae|Thermococcus|Thermococcus gammatolerans|Thermococcus gammatolerans EJ3	0	0	0	0	0	0	0	0	0	0	0	0	0	0	0	0	0	0	0	0	0	0
Archaea|Euryarchaeota|Thermococci|Thermococcales|Thermococcaceae|Thermococcus|Thermococcus kodakarensis|Thermococcus kodakarensis KOD1	0	0	0	0	0	0	0	0	0	0	0	0	0	0	0	0	0	0	0	0	0	0
Archaea|Euryarchaeota|Thermococci|Thermococcales|Thermococcaceae|Thermococcus|Thermococcus litoralis|Thermococcus litoralis DSM 5473	0	0	0	0	0	0	0	0	0	0	0	0	0	0	0	0	0	0	0	0	0	0
Archaea|Euryarchaeota|Thermococci|Thermococcales|Thermococcaceae|Thermococcus|Thermococcus onnurineus|Thermococcus onnurineus NA1	0	0	0	0	0	0	0	0	0	0	0	0	0	0	0	0	0	0	0	0	0	0
Archaea|Euryarchaeota|Thermococci|Thermococcales|Thermococcaceae|Thermococcus|Thermococcus sibiricus|Thermococcus sibiricus MM 739	0	0	0	0	0	0	0	0	0	0	0	0	0	0	0	0	0	0	0	0	0	0
Archaea|Euryarchaeota|Thermococci|Thermococcales|Thermococcaceae|Thermococcus|Thermococcus sp. 4557	0	0	0	0	0	0	0	0	0	0	0	0	0	0	0	0	0	0	0	0	0	0
Archaea|Euryarchaeota|Thermococci|Thermococcales|Thermococcaceae|Thermococcus|Thermococcus sp. AM4	0	0	0	0	0	0	0	0	0	0	0	0	0	0	0	0	0	0	0	0	0	0
Archaea|Euryarchaeota|Thermococci|Thermococcales|Thermococcaceae|Thermococcus|Thermococcus sp. CL1	0	0	0	0	0	0	0	0	0	0	0	0	0	0	0	0	0	0	0	0	0	0
Archaea|Euryarchaeota|Thermoplasmata|Thermoplasmatales|Ferroplasmaceae|Ferroplasma|Ferroplasma acidarmanus|Ferroplasma acidarmanus fer1	0	0	0	1	0	0	0	0	0	0	0	0	0	0	0	0	0	0	0	0	0	0
Archaea|Euryarchaeota|Thermoplasmata|Thermoplasmatales|Picrophilaceae|Picrophilus|Picrophilus torridus|Picrophilus torridus DSM 9790	0	0	0	0	0	0	0	0	0	0	0	0	0	0	0	0	0	0	0	0	0	0
Archaea|Euryarchaeota|Thermoplasmata|Thermoplasmatales|Thermoplasmataceae|Thermoplasma|Thermoplasma acidophilum|Thermoplasma acidophilum DSM 1728	0	0	0	0	0	0	0	0	0	0	0	0	0	0	0	0	0	0	0	0	0	0
Archaea|Euryarchaeota|Thermoplasmata|Thermoplasmatales|Thermoplasmataceae|Thermoplasma|Thermoplasma volcanium|Thermoplasma volcanium GSS1	0	0	0	0	0	0	0	0	0	0	0	0	0	0	0	0	0	0	0	0	0	0
Archaea|Euryarchaeota|unclassified Euryarchaeota|Aciduliprofundum|Aciduliprofundum boonei|Aciduliprofundum boonei T469	0	0	0	0	0	0	0	0	0	0	0	0	0	0	0	0	0	0	0	0	0	0
Archaea|Korarchaeota|Candidatus Korarchaeum|Candidatus Korarchaeum cryptofilum|Candidatus Korarchaeum cryptofilum OPF8	0	0	0	0	0	0	0	0	0	0	0	0	0	0	0	0	0	0	0	0	0	0
Archaea|Nanoarchaeota|Nanoarchaeum|Nanoarchaeum equitans|Nanoarchaeum equitans Kin4-M	0	0	0	0	0	0	0	0	0	0	0	0	0	0	0	0	0	0	0	0	0	0
Archaea|Nanohaloarchaeota|Nanohaloarchaea|Candidatus Haloredivivus|Candidatus Haloredivivus sp. G17	0	0	0	0	0	0	0	0	0	0	0	0	0	0	0	0	0	0	0	0	0	0
Archaea|Thaumarchaeota|Cenarchaeales|Cenarchaeaceae|Cenarchaeum|Cenarchaeum symbiosum|Cenarchaeum symbiosum A	0	0	0	0	0	0	0	0	0	0	0	0	0	0	0	0	0	0	0	0	0	0
Archaea|Thaumarchaeota|Nitrosopumilales|Nitrosopumilaceae|Candidatus Nitrosoarchaeum|Candidatus Nitrosoarchaeum koreensis|Candidatus Nitrosoarchaeum koreensis MY1	0	0	0	0	1	0	0	0	0	0	0	0	0	0	0	0	0	2	0	0	0	0
Archaea|Thaumarchaeota|Nitrosopumilales|Nitrosopumilaceae|Candidatus Nitrosoarchaeum|Candidatus Nitrosoarchaeum limnia|Candidatus Nitrosoarchaeum limnia SFB1	0	0	0	0	0	0	0	0	0	0	0	0	0	0	0	0	0	0	0	0	0	0
Archaea|Thaumarchaeota|Nitrosopumilales|Nitrosopumilaceae|Nitrosopumilus|Candidatus Nitrosopumilus salaria|Candidatus Nitrosopumilus salaria BD31	0	0	0	0	0	0	0	0	0	0	0	0	0	0	0	0	0	0	0	0	0	0
Archaea|Thaumarchaeota|Nitrosopumilales|Nitrosopumilaceae|Nitrosopumilus|Nitrosopumilus maritimus|Nitrosopumilus maritimus SCM1	0	0	0	0	0	0	0	0	0	0	0	0	0	0	0	0	0	0	0	0	0	0
Archaea|unclassified Archaea|unclassified Archaea (miscellaneous)|halophilic archaeon DL31	0	0	0	0	0	0	0	0	0	0	0	0	0	0	0	0	0	0	0	0	0	0
Bacteria|Actinobacteria|Acidimicrobidae|Acidimicrobiales|Acidimicrobineae|Acidimicrobiaceae|Acidimicrobium|Acidimicrobium ferrooxidans|Acidimicrobium ferrooxidans DSM 10331	0	0	0	0	0	0	0	0	0	0	0	0	0	0	0	0	0	0	0	0	0	0
Bacteria|Actinobacteria|Actinobacteridae|Actinomycetales|Actinomycineae|Actinomycetaceae|Actinomyces|Actinomyces coleocanis|Actinomyces coleocanis DSM 15436	0	0	0	0	0	0	0	0	0	0	0	0	0	0	0	0	0	0	0	0	0	0
Bacteria|Actinobacteria|Actinobacteridae|Actinomycetales|Actinomycineae|Actinomycetaceae|Actinomyces|Actinomyces georgiae|Actinomyces georgiae F0490	0	0	0	0	0	0	0	0	0	0	0	0	0	0	0	0	0	0	0	0	0	0
Bacteria|Actinobacteria|Actinobacteridae|Actinomycetales|Actinomycineae|Actinomycetaceae|Actinomyces|Actinomyces graevenitzii|Actinomyces graevenitzii C83	3	1	4	0	3	0	0	12	0	0	1	0	0	1	0	0	1	0	0	1	0	0
Bacteria|Actinobacteria|Actinobacteridae|Actinomycetales|Actinomycineae|Actinomycetaceae|Actinomyces|Actinomyces massiliensis|Actinomyces massiliensis F0489	0	0	2	0	0	0	0	4	0	0	0	0	0	0	0	0	1	0	0	0	0	0
Bacteria|Actinobacteria|Actinobacteridae|Actinomycetales|Actinomycineae|Actinomycetaceae|Actinomyces|Actinomyces naeslundii|Actinomyces naeslundii str. Howell 279	1	1	0	0	0	0	0	3	0	0	0	0	0	0	0	0	2	0	0	0	0	0
Bacteria|Actinobacteria|Actinobacteridae|Actinomycetales|Actinomycineae|Actinomycetaceae|Actinomyces|Actinomyces odontolyticus|Actinomyces odontolyticus ATCC 17982	0	0	0	0	0	0	0	0	0	0	0	0	0	0	0	0	0	0	0	0	0	0
Bacteria|Actinobacteria|Actinobacteridae|Actinomycetales|Actinomycineae|Actinomycetaceae|Actinomyces|Actinomyces odontolyticus|Actinomyces odontolyticus F0309	0	0	0	0	0	0	0	0	0	0	0	0	0	0	0	0	0	0	0	0	0	0
Bacteria|Actinobacteria|Actinobacteridae|Actinomycetales|Actinomycineae|Actinomycetaceae|Actinomyces|Actinomyces oris|Actinomyces oris K20	0	0	0	0	0	0	0	0	0	0	0	0	0	0	0	0	0	0	0	0	0	0
Bacteria|Actinobacteria|Actinobacteridae|Actinomycetales|Actinomycineae|Actinomycetaceae|Actinomyces|Actinomyces sp. ICM39	0	0	1	0	0	0	1	0	0	0	0	0	0	0	0	0	0	0	0	0	0	0
Bacteria|Actinobacteria|Actinobacteridae|Actinomycetales|Actinomycineae|Actinomycetaceae|Actinomyces|Actinomyces sp. ICM47	8	6	0	0	0	0	0	9	0	0	0	0	0	0	0	0	4	0	0	0	0	0
Bacteria|Actinobacteria|Actinobacteridae|Actinomycetales|Actinomycineae|Actinomycetaceae|Actinomyces|Actinomyces sp. oral taxon 170|Actinomyces sp. oral taxon 170 str. F0386	0	1	0	0	0	0	0	1	0	0	0	0	0	0	0	0	0	0	0	0	0	0
Bacteria|Actinobacteria|Actinobacteridae|Actinomycetales|Actinomycineae|Actinomycetaceae|Actinomyces|Actinomyces sp. oral taxon 171|Actinomyces sp. oral taxon 171 str. F0337	0	0	1	0	0	0	0	0	0	0	0	0	0	0	0	0	0	0	0	0	0	0
Bacteria|Actinobacteria|Actinobacteridae|Actinomycetales|Actinomycineae|Actinomycetaceae|Actinomyces|Actinomyces sp. oral taxon 175|Actinomyces sp. oral taxon 175 str. F0384	0	0	0	0	0	0	0	0	0	0	0	0	0	0	0	0	0	0	0	0	0	0
Bacteria|Actinobacteria|Actinobacteridae|Actinomycetales|Actinomycineae|Actinomycetaceae|Actinomyces|Actinomyces sp. oral taxon 178|Actinomyces sp. oral taxon 178 str. F0338	0	0	0	0	0	0	0	0	0	0	0	0	0	0	0	0	0	0	0	0	0	0
Bacteria|Actinobacteria|Actinobacteridae|Actinomycetales|Actinomycineae|Actinomycetaceae|Actinomyces|Actinomyces sp. oral taxon 180|Actinomyces sp. oral taxon 180 str. F0310	0	0	0	0	0	0	0	1	0	0	0	0	0	0	0	0	1	0	0	0	0	0
Bacteria|Actinobacteria|Actinobacteridae|Actinomycetales|Actinomycineae|Actinomycetaceae|Actinomyces|Actinomyces sp. oral taxon 448|Actinomyces sp. oral taxon 448 str. F0400	0	1	0	1	0	0	0	2	0	0	0	0	0	0	0	0	0	0	0	0	0	0
Bacteria|Actinobacteria|Actinobacteridae|Actinomycetales|Actinomycineae|Actinomycetaceae|Actinomyces|Actinomyces sp. oral taxon 848|Actinomyces sp. oral taxon 848 str. F0332	0	0	0	0	0	0	0	1	0	0	0	0	0	0	0	0	0	0	0	0	0	0
Bacteria|Actinobacteria|Actinobacteridae|Actinomycetales|Actinomycineae|Actinomycetaceae|Actinomyces|Actinomyces sp. oral taxon 849|Actinomyces sp. oral taxon 849 str. F0330	0	0	0	0	0	0	0	1	0	0	0	0	0	0	0	0	0	0	0	0	0	0
Bacteria|Actinobacteria|Actinobacteridae|Actinomycetales|Actinomycineae|Actinomycetaceae|Actinomyces|Actinomyces urogenitalis|Actinomyces urogenitalis DSM 15434	0	0	0	0	0	0	0	0	0	0	0	0	0	0	0	0	0	0	0	0	0	0
Bacteria|Actinobacteria|Actinobacteridae|Actinomycetales|Actinomycineae|Actinomycetaceae|Actinomyces|Actinomyces viscosus|Actinomyces viscosus C505	0	0	0	0	0	0	0	1	0	0	0	0	0	0	0	0	0	0	0	0	0	0
Bacteria|Actinobacteria|Actinobacteridae|Actinomycetales|Actinomycineae|Actinomycetaceae|Arcanobacterium|Arcanobacterium haemolyticum|Arcanobacterium haemolyticum DSM 20595	5	0	12	1	0	0	0	8	0	0	0	0	0	0	0	0	5	0	0	0	0	0
Bacteria|Actinobacteria|Actinobacteridae|Actinomycetales|Actinomycineae|Actinomycetaceae|Mobiluncus/Falcivibrio group|Mobiluncus|Mobiluncus curtisii|Mobiluncus curtisii ATCC 43063	0	0	0	0	0	0	0	0	0	0	0	0	0	0	0	0	0	0	0	0	0	0
Bacteria|Actinobacteria|Actinobacteridae|Actinomycetales|Actinomycineae|Actinomycetaceae|Mobiluncus/Falcivibrio group|Mobiluncus|Mobiluncus curtisii|Mobiluncus curtisii ATCC 51333	0	0	0	0	0	0	0	0	0	0	0	0	0	0	0	0	0	0	0	0	0	0
Bacteria|Actinobacteria|Actinobacteridae|Actinomycetales|Actinomycineae|Actinomycetaceae|Mobiluncus/Falcivibrio group|Mobiluncus|Mobiluncus curtisii|Mobiluncus curtisii subsp. curtisii|Mobiluncus curtisii subsp. curtisii ATCC 35241	0	0	0	0	0	0	0	0	0	0	0	0	0	0	0	0	0	0	0	0	0	0
Bacteria|Actinobacteria|Actinobacteridae|Actinomycetales|Actinomycineae|Actinomycetaceae|Mobiluncus/Falcivibrio group|Mobiluncus|Mobiluncus curtisii|Mobiluncus curtisii subsp. holmesii|Mobiluncus curtisii subsp. holmesii ATCC 35242	0	0	0	0	0	0	0	0	0	0	0	0	0	0	0	0	0	0	0	0	0	0
Bacteria|Actinobacteria|Actinobacteridae|Actinomycetales|Actinomycineae|Actinomycetaceae|Mobiluncus/Falcivibrio group|Mobiluncus|Mobiluncus mulieris|Mobiluncus mulieris 28-1	0	0	0	0	0	0	0	0	0	0	0	0	0	0	0	0	0	0	0	0	0	0
Bacteria|Actinobacteria|Actinobacteridae|Actinomycetales|Actinomycineae|Actinomycetaceae|Mobiluncus/Falcivibrio group|Mobiluncus|Mobiluncus mulieris|Mobiluncus mulieris ATCC 35239	0	0	0	0	0	0	0	0	0	0	0	0	0	0	0	0	0	0	0	0	0	0
Bacteria|Actinobacteria|Actinobacteridae|Actinomycetales|Actinomycineae|Actinomycetaceae|Mobiluncus/Falcivibrio group|Mobiluncus|Mobiluncus mulieris|Mobiluncus mulieris ATCC 35243	0	0	0	0	0	0	0	0	0	0	0	0	0	0	0	0	0	0	0	0	0	0
Bacteria|Actinobacteria|Actinobacteridae|Actinomycetales|Actinomycineae|Actinomycetaceae|Mobiluncus/Falcivibrio group|Mobiluncus|Mobiluncus mulieris|Mobiluncus mulieris FB024-16	0	0	0	0	0	0	0	0	0	0	0	0	0	0	0	0	0	0	0	0	0	0
Bacteria|Actinobacteria|Actinobacteridae|Actinomycetales|Catenulisporineae|Catenulisporaceae|Catenulispora|Catenulispora acidiphila|Catenulispora acidiphila DSM 44928	0	0	0	0	0	0	0	0	0	0	0	0	0	0	0	0	0	0	0	0	0	0
Bacteria|Actinobacteria|Actinobacteridae|Actinomycetales|Corynebacterineae|Corynebacteriaceae|Corynebacterium|Corynebacterium accolens|Corynebacterium accolens ATCC 49725	0	0	0	0	0	0	0	0	0	0	0	0	0	0	0	0	0	0	0	0	0	0
Bacteria|Actinobacteria|Actinobacteridae|Actinomycetales|Corynebacterineae|Corynebacteriaceae|Corynebacterium|Corynebacterium accolens|Corynebacterium accolens ATCC 49726	0	0	0	0	0	0	0	0	0	0	0	0	0	0	0	0	0	0	0	0	0	0
Bacteria|Actinobacteria|Actinobacteridae|Actinomycetales|Corynebacterineae|Corynebacteriaceae|Corynebacterium|Corynebacterium ammoniagenes|Corynebacterium ammoniagenes DSM 20306	10	2	2	3	3	0	0	0	0	0	0	0	0	0	0	0	3	2	1	0	0	0
Bacteria|Actinobacteria|Actinobacteridae|Actinomycetales|Corynebacterineae|Corynebacteriaceae|Corynebacterium|Corynebacterium amycolatum|Corynebacterium amycolatum SK46	4	0	1	1	0	0	0	3	0	0	0	0	0	1	0	0	3	0	0	0	0	0
Bacteria|Actinobacteria|Actinobacteridae|Actinomycetales|Corynebacterineae|Corynebacteriaceae|Corynebacterium|Corynebacterium aurimucosum|Corynebacterium aurimucosum ATCC 700975	1	0	0	0	0	0	0	1	0	0	0	0	0	0	0	0	1	0	0	0	0	0
Bacteria|Actinobacteria|Actinobacteridae|Actinomycetales|Corynebacterineae|Corynebacteriaceae|Corynebacterium|Corynebacterium bovis|Corynebacterium bovis DSM 20582= CIP 54.80	0	0	0	0	0	0	0	0	0	0	0	0	0	0	0	0	0	0	0	0	0	0
Bacteria|Actinobacteria|Actinobacteridae|Actinomycetales|Corynebacterineae|Corynebacteriaceae|Corynebacterium|Corynebacterium casei|Corynebacterium casei UCMA 3821	86	49	44	14	24	0	0	1	0	0	3	0	0	10	0	0	14	9	0	0	0	0
Bacteria|Actinobacteria|Actinobacteridae|Actinomycetales|Corynebacterineae|Corynebacteriaceae|Corynebacterium|Corynebacterium diphtheriae|Corynebacterium diphtheriae 241	0	0	0	0	0	0	0	0	0	0	0	0	0	0	0	0	0	0	0	0	0	0
Bacteria|Actinobacteria|Actinobacteridae|Actinomycetales|Corynebacterineae|Corynebacteriaceae|Corynebacterium|Corynebacterium diphtheriae|Corynebacterium diphtheriae 31A	0	0	0	0	0	0	0	0	0	0	0	0	0	0	0	0	0	0	0	0	0	0
Bacteria|Actinobacteria|Actinobacteridae|Actinomycetales|Corynebacterineae|Corynebacteriaceae|Corynebacterium|Corynebacterium diphtheriae|Corynebacterium diphtheriae BH8	4	14	9	8	10	16	5	9	5	5	19	5	3	3	0	0	7	16	15	0	0	0
Bacteria|Actinobacteria|Actinobacteridae|Actinomycetales|Corynebacterineae|Corynebacteriaceae|Corynebacterium|Corynebacterium diphtheriae|Corynebacterium diphtheriae bv. intermedius str. NCTC 5011	0	0	0	0	0	0	0	0	0	0	0	0	0	0	0	0	0	0	0	0	0	0
Bacteria|Actinobacteria|Actinobacteridae|Actinomycetales|Corynebacterineae|Corynebacteriaceae|Corynebacterium|Corynebacterium diphtheriae|Corynebacterium diphtheriae C7 (beta)	0	0	0	0	0	0	0	0	0	0	0	0	0	0	0	0	0	0	0	0	0	0
Bacteria|Actinobacteria|Actinobacteridae|Actinomycetales|Corynebacterineae|Corynebacteriaceae|Corynebacterium|Corynebacterium diphtheriae|Corynebacterium diphtheriae CDCE 8392	0	0	0	0	0	0	0	0	0	0	0	0	0	0	0	0	0	0	0	0	0	0
Bacteria|Actinobacteria|Actinobacteridae|Actinomycetales|Corynebacterineae|Corynebacteriaceae|Corynebacterium|Corynebacterium diphtheriae|Corynebacterium diphtheriae HC01	0	0	0	0	0	0	0	0	0	0	0	0	0	0	0	0	0	0	0	0	0	0
Bacteria|Actinobacteria|Actinobacteridae|Actinomycetales|Corynebacterineae|Corynebacteriaceae|Corynebacterium|Corynebacterium diphtheriae|Corynebacterium diphtheriae HC02	0	0	0	0	0	0	0	0	0	0	0	0	0	0	0	0	0	0	0	0	0	0
Bacteria|Actinobacteria|Actinobacteridae|Actinomycetales|Corynebacterineae|Corynebacteriaceae|Corynebacterium|Corynebacterium diphtheriae|Corynebacterium diphtheriae HC03	0	0	0	1	0	0	0	0	0	0	0	0	0	0	0	0	0	0	0	0	0	0
Bacteria|Actinobacteria|Actinobacteridae|Actinomycetales|Corynebacterineae|Corynebacteriaceae|Corynebacterium|Corynebacterium diphtheriae|Corynebacterium diphtheriae HC04	0	0	1	0	0	0	0	0	0	0	0	0	0	0	0	0	0	0	0	0	0	0
Bacteria|Actinobacteria|Actinobacteridae|Actinomycetales|Corynebacterineae|Corynebacteriaceae|Corynebacterium|Corynebacterium diphtheriae|Corynebacterium diphtheriae INCA 402	0	0	0	0	0	0	0	0	0	0	0	0	0	0	0	0	0	0	0	0	0	0
Bacteria|Actinobacteria|Actinobacteridae|Actinomycetales|Corynebacterineae|Corynebacteriaceae|Corynebacterium|Corynebacterium diphtheriae|Corynebacterium diphtheriae NCTC 13129	0	0	0	0	0	0	0	0	0	0	0	0	0	0	0	0	0	0	0	0	0	0
Bacteria|Actinobacteria|Actinobacteridae|Actinomycetales|Corynebacterineae|Corynebacteriaceae|Corynebacterium|Corynebacterium diphtheriae|Corynebacterium diphtheriae PW8	0	0	0	0	0	0	0	0	0	0	0	0	0	0	0	0	0	0	0	0	0	0
Bacteria|Actinobacteria|Actinobacteridae|Actinomycetales|Corynebacterineae|Corynebacteriaceae|Corynebacterium|Corynebacterium diphtheriae|Corynebacterium diphtheriae VA01	0	0	0	0	0	0	0	0	0	0	0	0	0	0	0	0	0	0	0	0	0	0
Bacteria|Actinobacteria|Actinobacteridae|Actinomycetales|Corynebacterineae|Corynebacteriaceae|Corynebacterium|Corynebacterium efficiens|Corynebacterium efficiens YS-314	2	12	7	1	5	0	0	1	0	0	0	0	0	0	0	0	9	1	0	0	0	0
Bacteria|Actinobacteria|Actinobacteridae|Actinomycetales|Corynebacterineae|Corynebacteriaceae|Corynebacterium|Corynebacterium genitalium|Corynebacterium genitalium ATCC 33030	0	0	0	0	0	0	0	1	0	0	0	0	0	0	0	0	0	0	0	0	0	0
Bacteria|Actinobacteria|Actinobacteridae|Actinomycetales|Corynebacterineae|Corynebacteriaceae|Corynebacterium|Corynebacterium glucuronolyticum|Corynebacterium glucuronolyticum ATCC 51866	0	0	0	0	0	0	0	0	0	0	0	0	0	0	0	0	0	0	0	0	0	0
Bacteria|Actinobacteria|Actinobacteridae|Actinomycetales|Corynebacterineae|Corynebacteriaceae|Corynebacterium|Corynebacterium glucuronolyticum|Corynebacterium glucuronolyticum ATCC 51867	0	0	0	0	0	0	0	0	0	0	0	0	0	0	0	0	0	0	0	0	0	0
Bacteria|Actinobacteria|Actinobacteridae|Actinomycetales|Corynebacterineae|Corynebacteriaceae|Corynebacterium|Corynebacterium glutamicum|Corynebacterium glutamicum ATCC 13032	16	7	2	3	7	0	0	1	0	0	0	0	0	3	0	0	10	1	0	0	0	0
Bacteria|Actinobacteria|Actinobacteridae|Actinomycetales|Corynebacterineae|Corynebacteriaceae|Corynebacterium|Corynebacterium glutamicum|Corynebacterium glutamicum R	23	4	5	6	3	1	0	0	0	0	2	1	0	0	0	0	8	1	0	0	0	0
Bacteria|Actinobacteria|Actinobacteridae|Actinomycetales|Corynebacterineae|Corynebacteriaceae|Corynebacterium|Corynebacterium jeikeium|Corynebacterium jeikeium ATCC 43734	0	0	0	0	0	0	0	0	0	0	0	0	0	0	0	0	0	0	0	0	0	0
Bacteria|Actinobacteria|Actinobacteridae|Actinomycetales|Corynebacterineae|Corynebacteriaceae|Corynebacterium|Corynebacterium jeikeium|Corynebacterium jeikeium K411	0	0	0	0	0	0	0	0	0	0	0	0	0	0	0	0	1	0	0	0	0	0
Bacteria|Actinobacteria|Actinobacteridae|Actinomycetales|Corynebacterineae|Corynebacteriaceae|Corynebacterium|Corynebacterium kroppenstedtii|Corynebacterium kroppenstedtii DSM 44385	3	3	0	0	0	0	0	0	0	0	0	0	0	0	0	0	0	0	0	0	0	0
Bacteria|Actinobacteria|Actinobacteridae|Actinomycetales|Corynebacterineae|Corynebacteriaceae|Corynebacterium|Corynebacterium lipophiloflavum|Corynebacterium lipophiloflavum DSM 44291	1	1	0	0	0	0	0	0	0	0	0	0	0	0	0	0	1	0	0	0	0	0
Bacteria|Actinobacteria|Actinobacteridae|Actinomycetales|Corynebacterineae|Corynebacteriaceae|Corynebacterium|Corynebacterium matruchotii|Corynebacterium matruchotii ATCC 14266	0	0	0	0	0	0	0	0	0	0	0	0	0	0	0	0	0	0	0	0	0	0
Bacteria|Actinobacteria|Actinobacteridae|Actinomycetales|Corynebacterineae|Corynebacteriaceae|Corynebacterium|Corynebacterium matruchotii|Corynebacterium matruchotii ATCC 33806	0	0	0	0	0	0	0	0	0	0	0	0	0	0	0	0	0	0	0	0	0	0
Bacteria|Actinobacteria|Actinobacteridae|Actinomycetales|Corynebacterineae|Corynebacteriaceae|Corynebacterium|Corynebacterium nuruki|Corynebacterium nuruki S6-4	2	0	3	0	3	0	0	0	0	0	0	0	0	3	0	0	2	1	0	0	0	0
Bacteria|Actinobacteria|Actinobacteridae|Actinomycetales|Corynebacterineae|Corynebacteriaceae|Corynebacterium|Corynebacterium pseudogenitalium|Corynebacterium pseudogenitalium ATCC 33035	0	0	0	0	0	0	0	1	0	0	0	0	0	0	0	0	0	0	0	0	0	0
Bacteria|Actinobacteria|Actinobacteridae|Actinomycetales|Corynebacterineae|Corynebacteriaceae|Corynebacterium|Corynebacterium pseudotuberculosis|Corynebacterium pseudotuberculosis 1/06-A	0	0	0	0	0	0	0	0	0	0	0	0	0	0	0	0	0	0	0	0	0	0
Bacteria|Actinobacteria|Actinobacteridae|Actinomycetales|Corynebacterineae|Corynebacteriaceae|Corynebacterium|Corynebacterium pseudotuberculosis|Corynebacterium pseudotuberculosis 1002	0	0	0	0	0	0	0	0	0	0	0	0	0	0	0	0	0	0	0	0	0	0
Bacteria|Actinobacteria|Actinobacteridae|Actinomycetales|Corynebacterineae|Corynebacteriaceae|Corynebacterium|Corynebacterium pseudotuberculosis|Corynebacterium pseudotuberculosis 258	0	0	0	0	0	0	0	0	0	0	0	0	0	0	0	0	0	0	0	0	0	0
Bacteria|Actinobacteria|Actinobacteridae|Actinomycetales|Corynebacterineae|Corynebacteriaceae|Corynebacterium|Corynebacterium pseudotuberculosis|Corynebacterium pseudotuberculosis 267	0	0	0	0	0	0	0	0	0	0	0	0	0	0	0	0	0	0	0	0	0	0
Bacteria|Actinobacteria|Actinobacteridae|Actinomycetales|Corynebacterineae|Corynebacteriaceae|Corynebacterium|Corynebacterium pseudotuberculosis|Corynebacterium pseudotuberculosis 3/99-5	0	0	0	0	0	0	0	0	0	0	0	0	0	0	0	0	0	0	0	0	0	0
Bacteria|Actinobacteria|Actinobacteridae|Actinomycetales|Corynebacterineae|Corynebacteriaceae|Corynebacterium|Corynebacterium pseudotuberculosis|Corynebacterium pseudotuberculosis 31	0	0	0	0	0	0	0	0	0	0	0	0	0	0	0	0	0	0	0	0	0	0
Bacteria|Actinobacteria|Actinobacteridae|Actinomycetales|Corynebacterineae|Corynebacteriaceae|Corynebacterium|Corynebacterium pseudotuberculosis|Corynebacterium pseudotuberculosis 316	0	0	0	0	0	0	0	0	0	0	0	0	0	0	0	0	0	0	0	0	0	0
Bacteria|Actinobacteria|Actinobacteridae|Actinomycetales|Corynebacterineae|Corynebacteriaceae|Corynebacterium|Corynebacterium pseudotuberculosis|Corynebacterium pseudotuberculosis 42/02-A	0	0	0	0	0	0	0	0	0	0	0	0	0	0	0	0	0	0	0	0	0	0
Bacteria|Actinobacteria|Actinobacteridae|Actinomycetales|Corynebacterineae|Corynebacteriaceae|Corynebacterium|Corynebacterium pseudotuberculosis|Corynebacterium pseudotuberculosis C231	0	0	0	0	0	0	0	0	0	0	0	0	0	0	0	0	0	0	0	0	0	0
Bacteria|Actinobacteria|Actinobacteridae|Actinomycetales|Corynebacterineae|Corynebacteriaceae|Corynebacterium|Corynebacterium pseudotuberculosis|Corynebacterium pseudotuberculosis CIP 52.97	0	0	0	0	0	0	0	0	0	0	0	0	0	0	0	0	0	0	0	0	0	0
Bacteria|Actinobacteria|Actinobacteridae|Actinomycetales|Corynebacterineae|Corynebacteriaceae|Corynebacterium|Corynebacterium pseudotuberculosis|Corynebacterium pseudotuberculosis Cp162	0	0	0	0	0	0	0	0	0	0	0	0	0	0	0	0	0	0	0	0	0	0
Bacteria|Actinobacteria|Actinobacteridae|Actinomycetales|Corynebacterineae|Corynebacteriaceae|Corynebacterium|Corynebacterium pseudotuberculosis|Corynebacterium pseudotuberculosis FRC41	0	0	0	0	0	0	0	0	0	0	0	0	0	0	0	0	0	0	0	0	0	0
Bacteria|Actinobacteria|Actinobacteridae|Actinomycetales|Corynebacterineae|Corynebacteriaceae|Corynebacterium|Corynebacterium pseudotuberculosis|Corynebacterium pseudotuberculosis I19	0	0	0	0	0	0	0	0	0	0	0	0	0	0	0	0	0	0	0	0	0	0
Bacteria|Actinobacteria|Actinobacteridae|Actinomycetales|Corynebacterineae|Corynebacteriaceae|Corynebacterium|Corynebacterium pseudotuberculosis|Corynebacterium pseudotuberculosis P54B96	0	0	0	0	0	0	0	0	0	0	0	0	0	0	0	0	0	0	0	0	0	0
Bacteria|Actinobacteria|Actinobacteridae|Actinomycetales|Corynebacterineae|Corynebacteriaceae|Corynebacterium|Corynebacterium pseudotuberculosis|Corynebacterium pseudotuberculosis PAT10	0	0	0	0	0	0	0	0	0	0	0	0	0	0	0	0	0	0	0	0	0	0
Bacteria|Actinobacteria|Actinobacteridae|Actinomycetales|Corynebacterineae|Corynebacteriaceae|Corynebacterium|Corynebacterium resistens|Corynebacterium resistens DSM 45100	0	0	0	0	0	0	0	0	0	0	0	0	0	0	0	0	0	0	0	0	0	0
Bacteria|Actinobacteria|Actinobacteridae|Actinomycetales|Corynebacterineae|Corynebacteriaceae|Corynebacterium|Corynebacterium striatum|Corynebacterium striatum ATCC 6940	2	0	2	1	1	0	0	0	0	0	0	0	0	0	0	0	1	0	0	0	0	0
Bacteria|Actinobacteria|Actinobacteridae|Actinomycetales|Corynebacterineae|Corynebacteriaceae|Corynebacterium|Corynebacterium tuberculostearicum|Corynebacterium tuberculostearicum SK141	0	1	0	0	0	0	0	0	0	0	0	0	0	0	0	0	0	0	0	0	0	0
Bacteria|Actinobacteria|Actinobacteridae|Actinomycetales|Corynebacterineae|Corynebacteriaceae|Corynebacterium|Corynebacterium ulcerans|Corynebacterium ulcerans 0102	0	0	0	0	0	0	0	0	0	0	0	0	0	0	0	0	0	0	0	0	0	0
Bacteria|Actinobacteria|Actinobacteridae|Actinomycetales|Corynebacterineae|Corynebacteriaceae|Corynebacterium|Corynebacterium ulcerans|Corynebacterium ulcerans 809	0	0	0	0	0	0	0	0	0	0	0	0	0	0	0	0	0	0	0	0	0	0
Bacteria|Actinobacteria|Actinobacteridae|Actinomycetales|Corynebacterineae|Corynebacteriaceae|Corynebacterium|Corynebacterium ulcerans|Corynebacterium ulcerans BR-AD22	0	0	0	0	0	0	0	0	0	0	0	0	0	0	0	0	0	0	0	0	0	0
Bacteria|Actinobacteria|Actinobacteridae|Actinomycetales|Corynebacterineae|Corynebacteriaceae|Corynebacterium|Corynebacterium urealyticum|Corynebacterium urealyticum DSM 7109	1	2	4	1	0	0	0	2	0	0	0	0	0	0	0	0	3	0	0	0	0	0
Bacteria|Actinobacteria|Actinobacteridae|Actinomycetales|Corynebacterineae|Corynebacteriaceae|Corynebacterium|Corynebacterium variabile|Corynebacterium variabile DSM 44702	135	37	30	18	43	0	0	11	0	0	2	2	0	13	0	0	26	8	0	0	0	0
Bacteria|Actinobacteria|Actinobacteridae|Actinomycetales|Corynebacterineae|Dietziaceae|Dietzia|Dietzia cinnamea|Dietzia cinnamea P4	57	50	29	27	39	0	1	9	0	0	1	1	0	5	0	0	19	6	0	0	0	0
Bacteria|Actinobacteria|Actinobacteridae|Actinomycetales|Corynebacterineae|Gordoniaceae|Gordonia|Gordonia alkanivorans|Gordonia alkanivorans NBRC 16433	13	4	10	9	5	1	0	1	0	0	6	2	0	1	0	0	3	5	1	0	0	6
Bacteria|Actinobacteria|Actinobacteridae|Actinomycetales|Corynebacterineae|Gordoniaceae|Gordonia|Gordonia amarae|Gordonia amarae NBRC 15530	0	1	0	1	0	0	0	0	0	0	0	0	0	0	0	0	1	0	0	0	0	0
Bacteria|Actinobacteria|Actinobacteridae|Actinomycetales|Corynebacterineae|Gordoniaceae|Gordonia|Gordonia araii|Gordonia araii NBRC 100433	0	0	0	0	0	0	0	0	0	0	0	0	0	0	0	0	0	0	0	0	0	0
Bacteria|Actinobacteria|Actinobacteridae|Actinomycetales|Corynebacterineae|Gordoniaceae|Gordonia|Gordonia bronchialis|Gordonia bronchialis DSM 43247	0	0	0	0	1	0	1	4	0	0	0	0	0	0	0	0	0	2	0	0	0	0
Bacteria|Actinobacteria|Actinobacteridae|Actinomycetales|Corynebacterineae|Gordoniaceae|Gordonia|Gordonia effusa|Gordonia effusa NBRC 100432	0	0	0	0	0	0	0	0	0	0	0	0	0	0	0	0	0	0	0	0	0	0
Bacteria|Actinobacteria|Actinobacteridae|Actinomycetales|Corynebacterineae|Gordoniaceae|Gordonia|Gordonia neofelifaecis|Gordonia neofelifaecis NRRL B-59395	0	3	1	0	0	0	0	0	0	0	0	0	0	0	0	0	2	0	0	0	0	0
Bacteria|Actinobacteria|Actinobacteridae|Actinomycetales|Corynebacterineae|Gordoniaceae|Gordonia|Gordonia otitidis|Gordonia otitidis NBRC 100426	0	0	2	0	0	0	0	2	0	0	0	0	0	0	0	0	5	0	0	0	0	0
Bacteria|Actinobacteria|Actinobacteridae|Actinomycetales|Corynebacterineae|Gordoniaceae|Gordonia|Gordonia polyisoprenivorans|Gordonia polyisoprenivorans NBRC 16320 = JCM 10675	0	0	0	0	0	0	0	0	0	0	0	0	0	0	0	0	0	0	0	0	0	0
Bacteria|Actinobacteria|Actinobacteridae|Actinomycetales|Corynebacterineae|Gordoniaceae|Gordonia|Gordonia polyisoprenivorans|Gordonia polyisoprenivorans VH2	0	0	0	0	0	0	0	0	0	0	0	0	0	0	0	0	0	0	0	0	0	0
Bacteria|Actinobacteria|Actinobacteridae|Actinomycetales|Corynebacterineae|Gordoniaceae|Gordonia|Gordonia sp. KTR9	0	1	1	0	0	0	0	2	0	0	1	0	0	0	0	0	0	1	0	0	0	0
Bacteria|Actinobacteria|Actinobacteridae|Actinomycetales|Corynebacterineae|Gordoniaceae|Gordonia|Gordonia sputi|Gordonia sputi NBRC 100414	0	5	0	0	1	0	0	6	0	0	0	0	0	2	0	0	4	1	0	0	0	0
Bacteria|Actinobacteria|Actinobacteridae|Actinomycetales|Corynebacterineae|Gordoniaceae|Gordonia|Gordonia terrae|Gordonia terrae NBRC 100016	1	0	1	1	1	2	0	2	0	0	2	1	0	1	1	0	0	1	0	2	0	0
Bacteria|Actinobacteria|Actinobacteridae|Actinomycetales|Corynebacterineae|Mycobacteriaceae|Amycolicicoccus|Amycolicicoccus subflavus|Amycolicicoccus subflavus DQS3-9A1	0	0	0	2	0	0	0	0	0	0	0	0	0	0	0	0	0	3	0	0	0	0
Bacteria|Actinobacteria|Actinobacteridae|Actinomycetales|Corynebacterineae|Mycobacteriaceae|Mycobacterium|Mycobacterium avium complex (MAC)|Mycobacterium avium|Mycobacterium avium 104	0	0	0	0	0	0	0	0	0	0	0	0	0	0	0	0	0	0	0	0	0	0
Bacteria|Actinobacteria|Actinobacteridae|Actinomycetales|Corynebacterineae|Mycobacteriaceae|Mycobacterium|Mycobacterium avium complex (MAC)|Mycobacterium avium|Mycobacterium avium subsp. avium|Mycobacterium avium subsp. avium ATCC 25291	0	0	0	0	0	0	0	0	0	0	0	0	0	0	0	0	0	0	0	0	0	0
Bacteria|Actinobacteria|Actinobacteridae|Actinomycetales|Corynebacterineae|Mycobacteriaceae|Mycobacterium|Mycobacterium avium complex (MAC)|Mycobacterium avium|Mycobacterium avium subsp. paratuberculosis|Mycobacterium avium subsp. paratuberculosis 4B	0	0	0	0	0	0	0	0	0	0	0	0	0	0	0	0	0	0	0	0	0	0
Bacteria|Actinobacteria|Actinobacteridae|Actinomycetales|Corynebacterineae|Mycobacteriaceae|Mycobacterium|Mycobacterium avium complex (MAC)|Mycobacterium avium|Mycobacterium avium subsp. paratuberculosis|Mycobacterium avium subsp. paratuberculosis K-10	0	0	0	0	0	0	0	0	0	0	0	0	0	0	0	0	0	0	0	0	0	0
Bacteria|Actinobacteria|Actinobacteridae|Actinomycetales|Corynebacterineae|Mycobacteriaceae|Mycobacterium|Mycobacterium avium complex (MAC)|Mycobacterium avium|Mycobacterium avium subsp. paratuberculosis|Mycobacterium avium subsp. paratuberculosis Pt139	0	0	0	0	0	0	0	0	0	0	0	0	0	0	0	0	0	0	0	0	0	0
Bacteria|Actinobacteria|Actinobacteridae|Actinomycetales|Corynebacterineae|Mycobacteriaceae|Mycobacterium|Mycobacterium avium complex (MAC)|Mycobacterium avium|Mycobacterium avium subsp. paratuberculosis|Mycobacterium avium subsp. paratuberculosis Pt144	0	0	0	0	0	0	0	0	0	0	0	0	0	0	0	0	0	0	0	0	0	0
Bacteria|Actinobacteria|Actinobacteridae|Actinomycetales|Corynebacterineae|Mycobacteriaceae|Mycobacterium|Mycobacterium avium complex (MAC)|Mycobacterium avium|Mycobacterium avium subsp. paratuberculosis|Mycobacterium avium subsp. paratuberculosis Pt145	0	0	0	0	0	0	0	0	0	0	0	0	0	0	0	0	0	0	0	0	0	0
Bacteria|Actinobacteria|Actinobacteridae|Actinomycetales|Corynebacterineae|Mycobacteriaceae|Mycobacterium|Mycobacterium avium complex (MAC)|Mycobacterium avium|Mycobacterium avium subsp. paratuberculosis|Mycobacterium avium subsp. paratuberculosis Pt146	0	0	0	0	0	0	0	0	0	0	0	0	0	0	0	0	0	0	0	0	0	0
Bacteria|Actinobacteria|Actinobacteridae|Actinomycetales|Corynebacterineae|Mycobacteriaceae|Mycobacterium|Mycobacterium avium complex (MAC)|Mycobacterium avium|Mycobacterium avium subsp. paratuberculosis|Mycobacterium avium subsp. paratuberculosis Pt154	0	0	0	0	0	0	0	0	0	0	0	0	0	0	0	0	0	0	0	0	0	0
Bacteria|Actinobacteria|Actinobacteridae|Actinomycetales|Corynebacterineae|Mycobacteriaceae|Mycobacterium|Mycobacterium avium complex (MAC)|Mycobacterium avium|Mycobacterium avium subsp. paratuberculosis|Mycobacterium avium subsp. paratuberculosis Pt155	0	0	0	0	0	0	0	0	0	0	0	0	0	0	0	0	0	0	0	0	0	0
Bacteria|Actinobacteria|Actinobacteridae|Actinomycetales|Corynebacterineae|Mycobacteriaceae|Mycobacterium|Mycobacterium avium complex (MAC)|Mycobacterium avium|Mycobacterium avium subsp. paratuberculosis|Mycobacterium avium subsp. paratuberculosis Pt164	0	0	0	0	0	0	0	0	0	0	0	0	0	0	0	0	0	0	0	0	0	0
Bacteria|Actinobacteria|Actinobacteridae|Actinomycetales|Corynebacterineae|Mycobacteriaceae|Mycobacterium|Mycobacterium avium complex (MAC)|Mycobacterium colombiense|Mycobacterium colombiense CECT 3035	0	0	0	0	0	0	0	0	0	0	0	0	0	0	0	0	0	0	0	0	0	0
Bacteria|Actinobacteria|Actinobacteridae|Actinomycetales|Corynebacterineae|Mycobacteriaceae|Mycobacterium|Mycobacterium avium complex (MAC)|Mycobacterium intracellulare|Mycobacterium intracellulare ATCC 13950	0	0	0	0	0	0	0	0	0	0	0	0	0	0	0	0	0	0	0	0	0	0
Bacteria|Actinobacteria|Actinobacteridae|Actinomycetales|Corynebacterineae|Mycobacteriaceae|Mycobacterium|Mycobacterium avium complex (MAC)|Mycobacterium intracellulare|Mycobacterium intracellulare MOTT-02	0	0	0	0	0	0	0	0	0	0	0	0	0	0	0	0	0	0	0	0	0	0
Bacteria|Actinobacteria|Actinobacteridae|Actinomycetales|Corynebacterineae|Mycobacteriaceae|Mycobacterium|Mycobacterium avium complex (MAC)|Mycobacterium intracellulare|Mycobacterium intracellulare MOTT-64	0	0	0	0	0	0	0	0	0	0	0	0	0	0	0	0	0	0	0	0	0	0
Bacteria|Actinobacteria|Actinobacteridae|Actinomycetales|Corynebacterineae|Mycobacteriaceae|Mycobacterium|Mycobacterium chelonae group|Mycobacterium abscessus subgroup|Mycobacterium abscessus|Mycobacterium abscessus 3A-0119-R	0	0	0	0	0	0	0	0	0	0	0	0	0	0	0	0	0	0	0	0	0	0
Bacteria|Actinobacteria|Actinobacteridae|Actinomycetales|Corynebacterineae|Mycobacteriaceae|Mycobacterium|Mycobacterium chelonae group|Mycobacterium abscessus subgroup|Mycobacterium abscessus|Mycobacterium abscessus 3A-0122-R	0	0	0	0	0	0	0	0	0	0	0	0	0	0	0	0	0	0	0	0	0	0
Bacteria|Actinobacteria|Actinobacteridae|Actinomycetales|Corynebacterineae|Mycobacteriaceae|Mycobacterium|Mycobacterium chelonae group|Mycobacterium abscessus subgroup|Mycobacterium abscessus|Mycobacterium abscessus 3A-0122-S	0	0	0	0	0	0	0	0	0	0	0	0	0	0	0	0	0	0	0	0	0	0
Bacteria|Actinobacteria|Actinobacteridae|Actinomycetales|Corynebacterineae|Mycobacteriaceae|Mycobacterium|Mycobacterium chelonae group|Mycobacterium abscessus subgroup|Mycobacterium abscessus|Mycobacterium abscessus 3A-0731	0	0	0	0	0	0	0	0	0	0	0	0	0	0	0	0	0	0	0	0	0	0
Bacteria|Actinobacteria|Actinobacteridae|Actinomycetales|Corynebacterineae|Mycobacteriaceae|Mycobacterium|Mycobacterium chelonae group|Mycobacterium abscessus subgroup|Mycobacterium abscessus|Mycobacterium abscessus 3A-0810-R	0	0	0	0	0	0	0	0	0	0	0	0	0	0	0	0	0	0	0	0	0	0
Bacteria|Actinobacteria|Actinobacteridae|Actinomycetales|Corynebacterineae|Mycobacteriaceae|Mycobacterium|Mycobacterium chelonae group|Mycobacterium abscessus subgroup|Mycobacterium abscessus|Mycobacterium abscessus 3A-0930-R	0	0	0	0	0	0	0	0	0	0	0	0	0	0	0	0	0	0	0	0	0	0
Bacteria|Actinobacteria|Actinobacteridae|Actinomycetales|Corynebacterineae|Mycobacteriaceae|Mycobacterium|Mycobacterium chelonae group|Mycobacterium abscessus subgroup|Mycobacterium abscessus|Mycobacterium abscessus 3A-0930-S	0	0	0	0	0	0	0	0	0	0	0	0	0	0	0	0	0	0	0	0	0	0
Bacteria|Actinobacteria|Actinobacteridae|Actinomycetales|Corynebacterineae|Mycobacteriaceae|Mycobacterium|Mycobacterium chelonae group|Mycobacterium abscessus subgroup|Mycobacterium abscessus|Mycobacterium abscessus 47J26	0	0	0	0	0	0	0	0	0	0	0	0	0	0	0	0	0	0	0	0	0	0
Bacteria|Actinobacteria|Actinobacteridae|Actinomycetales|Corynebacterineae|Mycobacteriaceae|Mycobacterium|Mycobacterium chelonae group|Mycobacterium abscessus subgroup|Mycobacterium abscessus|Mycobacterium abscessus 4S-0116-R	0	0	0	0	0	0	0	0	0	0	0	0	0	0	0	0	0	0	0	0	0	0
Bacteria|Actinobacteria|Actinobacteridae|Actinomycetales|Corynebacterineae|Mycobacteriaceae|Mycobacterium|Mycobacterium chelonae group|Mycobacterium abscessus subgroup|Mycobacterium abscessus|Mycobacterium abscessus 4S-0116-S	0	0	0	0	0	0	0	0	0	0	0	0	0	0	0	0	0	0	0	0	0	0
Bacteria|Actinobacteria|Actinobacteridae|Actinomycetales|Corynebacterineae|Mycobacteriaceae|Mycobacterium|Mycobacterium chelonae group|Mycobacterium abscessus subgroup|Mycobacterium abscessus|Mycobacterium abscessus 4S-0206	0	0	0	0	0	0	0	0	0	0	0	0	0	0	0	0	0	0	0	0	0	0
Bacteria|Actinobacteria|Actinobacteridae|Actinomycetales|Corynebacterineae|Mycobacteriaceae|Mycobacterium|Mycobacterium chelonae group|Mycobacterium abscessus subgroup|Mycobacterium abscessus|Mycobacterium abscessus 4S-0303	0	0	0	0	0	0	0	0	0	0	0	0	0	0	0	0	0	0	0	0	0	0
Bacteria|Actinobacteria|Actinobacteridae|Actinomycetales|Corynebacterineae|Mycobacteriaceae|Mycobacterium|Mycobacterium chelonae group|Mycobacterium abscessus subgroup|Mycobacterium abscessus|Mycobacterium abscessus 4S-0726-RA	0	0	0	0	0	0	0	0	0	0	0	0	0	0	0	0	0	0	0	0	0	0
Bacteria|Actinobacteria|Actinobacteridae|Actinomycetales|Corynebacterineae|Mycobacteriaceae|Mycobacterium|Mycobacterium chelonae group|Mycobacterium abscessus subgroup|Mycobacterium abscessus|Mycobacterium abscessus 4S-0726-RB	0	0	0	0	0	0	0	0	0	0	0	0	0	0	0	0	0	0	0	0	0	0
Bacteria|Actinobacteria|Actinobacteridae|Actinomycetales|Corynebacterineae|Mycobacteriaceae|Mycobacterium|Mycobacterium chelonae group|Mycobacterium abscessus subgroup|Mycobacterium abscessus|Mycobacterium abscessus 5S-0304	0	0	0	0	0	0	0	0	0	0	0	0	0	0	0	0	0	0	0	0	0	0
Bacteria|Actinobacteria|Actinobacteridae|Actinomycetales|Corynebacterineae|Mycobacteriaceae|Mycobacterium|Mycobacterium chelonae group|Mycobacterium abscessus subgroup|Mycobacterium abscessus|Mycobacterium abscessus 5S-0421	0	0	0	0	0	0	0	0	0	0	0	0	0	0	0	0	0	0	0	0	0	0
Bacteria|Actinobacteria|Actinobacteridae|Actinomycetales|Corynebacterineae|Mycobacteriaceae|Mycobacterium|Mycobacterium chelonae group|Mycobacterium abscessus subgroup|Mycobacterium abscessus|Mycobacterium abscessus 5S-0422	0	0	0	0	0	0	0	0	0	0	0	0	0	0	0	0	0	0	0	0	0	0
Bacteria|Actinobacteria|Actinobacteridae|Actinomycetales|Corynebacterineae|Mycobacteriaceae|Mycobacterium|Mycobacterium chelonae group|Mycobacterium abscessus subgroup|Mycobacterium abscessus|Mycobacterium abscessus 5S-0708	0	0	0	0	0	0	0	0	0	0	0	0	0	0	0	0	0	0	0	0	0	0
Bacteria|Actinobacteria|Actinobacteridae|Actinomycetales|Corynebacterineae|Mycobacteriaceae|Mycobacterium|Mycobacterium chelonae group|Mycobacterium abscessus subgroup|Mycobacterium abscessus|Mycobacterium abscessus 5S-0817	0	0	0	0	0	0	0	0	0	0	0	0	0	0	0	0	0	0	0	0	0	0
Bacteria|Actinobacteria|Actinobacteridae|Actinomycetales|Corynebacterineae|Mycobacteriaceae|Mycobacterium|Mycobacterium chelonae group|Mycobacterium abscessus subgroup|Mycobacterium abscessus|Mycobacterium abscessus 5S-0921	0	0	0	0	0	0	0	0	0	0	0	0	0	0	0	0	0	0	0	0	0	0
Bacteria|Actinobacteria|Actinobacteridae|Actinomycetales|Corynebacterineae|Mycobacteriaceae|Mycobacterium|Mycobacterium chelonae group|Mycobacterium abscessus subgroup|Mycobacterium abscessus|Mycobacterium abscessus 5S-1212	0	0	0	0	0	0	0	0	0	0	0	0	0	0	0	0	0	0	0	0	0	0
Bacteria|Actinobacteria|Actinobacteridae|Actinomycetales|Corynebacterineae|Mycobacteriaceae|Mycobacterium|Mycobacterium chelonae group|Mycobacterium abscessus subgroup|Mycobacterium abscessus|Mycobacterium abscessus 5S-1215	0	0	0	0	0	0	0	0	0	0	0	0	0	0	0	0	0	0	0	0	0	0
Bacteria|Actinobacteria|Actinobacteridae|Actinomycetales|Corynebacterineae|Mycobacteriaceae|Mycobacterium|Mycobacterium chelonae group|Mycobacterium abscessus subgroup|Mycobacterium abscessus|Mycobacterium abscessus 6G-0125-R	0	0	0	0	0	0	0	0	0	0	0	0	0	0	0	0	0	0	0	0	0	0
Bacteria|Actinobacteria|Actinobacteridae|Actinomycetales|Corynebacterineae|Mycobacteriaceae|Mycobacterium|Mycobacterium chelonae group|Mycobacterium abscessus subgroup|Mycobacterium abscessus|Mycobacterium abscessus 6G-0125-S	0	0	0	0	0	0	0	0	0	0	0	0	0	0	0	0	0	0	0	0	0	0
Bacteria|Actinobacteria|Actinobacteridae|Actinomycetales|Corynebacterineae|Mycobacteriaceae|Mycobacterium|Mycobacterium chelonae group|Mycobacterium abscessus subgroup|Mycobacterium abscessus|Mycobacterium abscessus 6G-0212	0	0	0	0	0	0	0	0	0	0	0	0	0	0	0	0	0	0	0	0	0	0
Bacteria|Actinobacteria|Actinobacteridae|Actinomycetales|Corynebacterineae|Mycobacteriaceae|Mycobacterium|Mycobacterium chelonae group|Mycobacterium abscessus subgroup|Mycobacterium abscessus|Mycobacterium abscessus 6G-0728-R	0	0	0	0	0	0	0	0	0	0	0	0	0	0	0	0	0	0	0	0	0	0
Bacteria|Actinobacteria|Actinobacteridae|Actinomycetales|Corynebacterineae|Mycobacteriaceae|Mycobacterium|Mycobacterium chelonae group|Mycobacterium abscessus subgroup|Mycobacterium abscessus|Mycobacterium abscessus 6G-0728-S	0	0	0	0	0	0	0	0	0	0	0	0	0	0	0	0	0	0	0	0	0	0
Bacteria|Actinobacteria|Actinobacteridae|Actinomycetales|Corynebacterineae|Mycobacteriaceae|Mycobacterium|Mycobacterium chelonae group|Mycobacterium abscessus subgroup|Mycobacterium abscessus|Mycobacterium abscessus 6G-1108	0	0	0	0	0	0	0	0	0	0	0	0	0	0	0	0	0	0	0	0	0	0
Bacteria|Actinobacteria|Actinobacteridae|Actinomycetales|Corynebacterineae|Mycobacteriaceae|Mycobacterium|Mycobacterium chelonae group|Mycobacterium abscessus subgroup|Mycobacterium abscessus|Mycobacterium abscessus ATCC 19977	0	0	0	0	0	0	0	0	0	0	0	0	0	0	0	0	0	0	0	0	0	0
Bacteria|Actinobacteria|Actinobacteridae|Actinomycetales|Corynebacterineae|Mycobacteriaceae|Mycobacterium|Mycobacterium chelonae group|Mycobacterium abscessus subgroup|Mycobacterium abscessus|Mycobacterium abscessus M115	0	0	0	0	0	0	0	0	0	0	0	0	0	0	0	0	0	0	0	0	0	0
Bacteria|Actinobacteria|Actinobacteridae|Actinomycetales|Corynebacterineae|Mycobacteriaceae|Mycobacterium|Mycobacterium chelonae group|Mycobacterium abscessus subgroup|Mycobacterium abscessus|Mycobacterium abscessus M139	0	0	0	0	0	0	0	0	0	0	0	0	0	0	0	0	0	0	0	0	0	0
Bacteria|Actinobacteria|Actinobacteridae|Actinomycetales|Corynebacterineae|Mycobacteriaceae|Mycobacterium|Mycobacterium chelonae group|Mycobacterium abscessus subgroup|Mycobacterium abscessus|Mycobacterium abscessus M148	0	0	0	0	0	0	0	0	0	0	0	0	0	0	0	0	0	0	0	0	0	0
Bacteria|Actinobacteria|Actinobacteridae|Actinomycetales|Corynebacterineae|Mycobacteriaceae|Mycobacterium|Mycobacterium chelonae group|Mycobacterium abscessus subgroup|Mycobacterium abscessus|Mycobacterium abscessus M152	0	0	0	0	0	0	0	0	0	0	0	0	0	0	0	0	0	0	0	0	0	0
Bacteria|Actinobacteria|Actinobacteridae|Actinomycetales|Corynebacterineae|Mycobacteriaceae|Mycobacterium|Mycobacterium chelonae group|Mycobacterium abscessus subgroup|Mycobacterium abscessus|Mycobacterium abscessus M154	0	0	0	0	0	0	0	0	0	0	0	0	0	0	0	0	0	0	0	0	0	0
Bacteria|Actinobacteria|Actinobacteridae|Actinomycetales|Corynebacterineae|Mycobacteriaceae|Mycobacterium|Mycobacterium chelonae group|Mycobacterium abscessus subgroup|Mycobacterium abscessus|Mycobacterium abscessus M156	0	0	0	0	0	0	0	0	0	0	0	0	0	0	0	0	0	0	0	0	0	0
Bacteria|Actinobacteria|Actinobacteridae|Actinomycetales|Corynebacterineae|Mycobacteriaceae|Mycobacterium|Mycobacterium chelonae group|Mycobacterium abscessus subgroup|Mycobacterium abscessus|Mycobacterium abscessus M159	0	0	1	0	0	0	0	0	0	0	0	0	0	0	0	0	0	0	0	0	0	9
Bacteria|Actinobacteria|Actinobacteridae|Actinomycetales|Corynebacterineae|Mycobacteriaceae|Mycobacterium|Mycobacterium chelonae group|Mycobacterium abscessus subgroup|Mycobacterium abscessus|Mycobacterium abscessus M172	0	0	0	0	0	0	0	0	0	0	0	0	0	0	0	0	0	0	0	0	0	0
Bacteria|Actinobacteria|Actinobacteridae|Actinomycetales|Corynebacterineae|Mycobacteriaceae|Mycobacterium|Mycobacterium chelonae group|Mycobacterium abscessus subgroup|Mycobacterium abscessus|Mycobacterium abscessus M24	0	0	0	0	0	0	0	0	0	0	0	0	0	0	0	0	0	0	0	0	0	0
Bacteria|Actinobacteria|Actinobacteridae|Actinomycetales|Corynebacterineae|Mycobacteriaceae|Mycobacterium|Mycobacterium chelonae group|Mycobacterium abscessus subgroup|Mycobacterium abscessus|Mycobacterium abscessus M93	0	0	0	0	0	0	0	0	0	0	0	0	0	0	0	0	0	0	0	0	0	0
Bacteria|Actinobacteria|Actinobacteridae|Actinomycetales|Corynebacterineae|Mycobacteriaceae|Mycobacterium|Mycobacterium chelonae group|Mycobacterium abscessus subgroup|Mycobacterium abscessus|Mycobacterium abscessus M94	0	0	0	0	0	0	0	0	0	0	0	0	0	0	0	0	0	0	0	0	0	0
Bacteria|Actinobacteria|Actinobacteridae|Actinomycetales|Corynebacterineae|Mycobacteriaceae|Mycobacterium|Mycobacterium chelonae group|Mycobacterium abscessus subgroup|Mycobacterium abscessus|Mycobacterium abscessus subsp. bolletii|Mycobacterium abscessus subsp. bolletii 1S-151-0930	0	0	0	0	0	0	0	0	0	0	0	0	0	0	0	0	0	0	0	0	0	0
Bacteria|Actinobacteria|Actinobacteridae|Actinomycetales|Corynebacterineae|Mycobacteriaceae|Mycobacterium|Mycobacterium chelonae group|Mycobacterium abscessus subgroup|Mycobacterium abscessus|Mycobacterium abscessus subsp. bolletii|Mycobacterium abscessus subsp. bolletii 1S-152-0914	0	0	0	0	0	0	0	0	0	0	0	0	0	0	0	0	0	0	0	0	0	0
Bacteria|Actinobacteria|Actinobacteridae|Actinomycetales|Corynebacterineae|Mycobacteriaceae|Mycobacterium|Mycobacterium chelonae group|Mycobacterium abscessus subgroup|Mycobacterium abscessus|Mycobacterium abscessus subsp. bolletii|Mycobacterium abscessus subsp. bolletii 1S-153-0915	0	0	0	0	0	0	0	0	0	0	0	0	0	0	0	0	0	0	0	0	0	0
Bacteria|Actinobacteria|Actinobacteridae|Actinomycetales|Corynebacterineae|Mycobacteriaceae|Mycobacterium|Mycobacterium chelonae group|Mycobacterium abscessus subgroup|Mycobacterium abscessus|Mycobacterium abscessus subsp. bolletii|Mycobacterium abscessus subsp. bolletii 2B-0107	0	0	0	0	0	0	0	0	0	0	0	0	0	0	0	0	0	0	0	0	0	0
Bacteria|Actinobacteria|Actinobacteridae|Actinomycetales|Corynebacterineae|Mycobacteriaceae|Mycobacterium|Mycobacterium chelonae group|Mycobacterium abscessus subgroup|Mycobacterium abscessus|Mycobacterium abscessus subsp. bolletii|Mycobacterium abscessus subsp. bolletii 2B-0307	0	0	0	0	0	0	0	0	0	0	0	0	0	0	0	0	0	0	0	0	0	0
Bacteria|Actinobacteria|Actinobacteridae|Actinomycetales|Corynebacterineae|Mycobacteriaceae|Mycobacterium|Mycobacterium chelonae group|Mycobacterium abscessus subgroup|Mycobacterium abscessus|Mycobacterium abscessus subsp. bolletii|Mycobacterium abscessus subsp. bolletii 2B-0626	0	0	0	0	0	0	0	0	0	0	0	0	0	0	0	0	0	0	0	0	0	0
Bacteria|Actinobacteria|Actinobacteridae|Actinomycetales|Corynebacterineae|Mycobacteriaceae|Mycobacterium|Mycobacterium chelonae group|Mycobacterium abscessus subgroup|Mycobacterium abscessus|Mycobacterium abscessus subsp. bolletii|Mycobacterium abscessus subsp. bolletii 2B-0912-R	0	0	0	0	0	0	0	0	0	0	0	0	0	0	0	0	0	0	0	0	0	0
Bacteria|Actinobacteria|Actinobacteridae|Actinomycetales|Corynebacterineae|Mycobacteriaceae|Mycobacterium|Mycobacterium chelonae group|Mycobacterium abscessus subgroup|Mycobacterium abscessus|Mycobacterium abscessus subsp. bolletii|Mycobacterium abscessus subsp. bolletii 2B-0912-S	0	0	0	0	0	0	0	0	0	0	0	0	0	0	0	0	0	0	0	0	0	0
Bacteria|Actinobacteria|Actinobacteridae|Actinomycetales|Corynebacterineae|Mycobacteriaceae|Mycobacterium|Mycobacterium chelonae group|Mycobacterium abscessus subgroup|Mycobacterium abscessus|Mycobacterium abscessus subsp. bolletii|Mycobacterium abscessus subsp. bolletii 2B-1231	0	0	0	0	0	0	0	0	0	0	0	0	0	0	0	0	0	0	0	0	0	0
Bacteria|Actinobacteria|Actinobacteridae|Actinomycetales|Corynebacterineae|Mycobacteriaceae|Mycobacterium|Mycobacterium chelonae group|Mycobacterium abscessus subgroup|Mycobacterium abscessus|Mycobacterium abscessus subsp. bolletii|Mycobacterium abscessus subsp. bolletii CCUG 48898 = JCM 15300	0	0	0	0	0	0	0	0	0	0	0	0	0	0	0	0	0	0	0	0	0	0
Bacteria|Actinobacteria|Actinobacteridae|Actinomycetales|Corynebacterineae|Mycobacteriaceae|Mycobacterium|Mycobacterium chelonae group|Mycobacterium abscessus subgroup|Mycobacterium abscessus|Mycobacterium abscessus subsp. bolletii|Mycobacterium abscessus subsp. bolletii str. GO 06	0	0	0	0	0	0	0	0	0	0	0	0	0	0	0	0	0	0	0	0	0	0
Bacteria|Actinobacteria|Actinobacteridae|Actinomycetales|Corynebacterineae|Mycobacteriaceae|Mycobacterium|Mycobacterium chubuense|Mycobacterium chubuense NBB4	0	0	0	0	0	0	0	0	0	0	1	0	0	0	0	0	0	0	0	0	0	0
Bacteria|Actinobacteria|Actinobacteridae|Actinomycetales|Corynebacterineae|Mycobacteriaceae|Mycobacterium|Mycobacterium gilvum|Mycobacterium gilvum PYR-GCK	4	39	9	4	2	5	1	2	0	0	2	0	0	0	0	0	14	4	0	0	0	3
Bacteria|Actinobacteria|Actinobacteridae|Actinomycetales|Corynebacterineae|Mycobacteriaceae|Mycobacterium|Mycobacterium gilvum|Mycobacterium gilvum Spyr1	0	0	1	0	0	1	0	4	1	0	0	0	0	0	0	0	0	1	1	0	0	0
Bacteria|Actinobacteria|Actinobacteridae|Actinomycetales|Corynebacterineae|Mycobacteriaceae|Mycobacterium|Mycobacterium kansasii|Mycobacterium kansasii ATCC 12478	0	0	0	0	0	0	0	2	0	0	0	0	0	0	0	0	0	0	2	0	0	0
Bacteria|Actinobacteria|Actinobacteridae|Actinomycetales|Corynebacterineae|Mycobacteriaceae|Mycobacterium|Mycobacterium leprae|Mycobacterium leprae Br4923	0	0	0	0	0	0	0	0	0	0	0	0	0	0	0	0	0	0	0	0	0	0
Bacteria|Actinobacteria|Actinobacteridae|Actinomycetales|Corynebacterineae|Mycobacteriaceae|Mycobacterium|Mycobacterium leprae|Mycobacterium leprae TN	0	0	0	0	0	0	0	0	0	0	0	0	0	0	0	0	0	0	0	0	0	0
Bacteria|Actinobacteria|Actinobacteridae|Actinomycetales|Corynebacterineae|Mycobacteriaceae|Mycobacterium|Mycobacterium mageritense|Mycobacterium mageritense JR2009	0	1	0	0	0	0	0	0	1	0	0	0	0	0	0	0	0	0	0	0	0	0
Bacteria|Actinobacteria|Actinobacteridae|Actinomycetales|Corynebacterineae|Mycobacteriaceae|Mycobacterium|Mycobacterium marinum|Mycobacterium marinum M	0	0	0	0	0	0	0	0	0	0	0	0	0	0	0	0	0	0	0	0	0	0
Bacteria|Actinobacteria|Actinobacteridae|Actinomycetales|Corynebacterineae|Mycobacteriaceae|Mycobacterium|Mycobacterium parascrofulaceum|Mycobacterium parascrofulaceum ATCC BAA-614	0	0	0	0	0	0	1	1	2	0	0	0	0	0	0	0	0	0	0	0	0	1
Bacteria|Actinobacteria|Actinobacteridae|Actinomycetales|Corynebacterineae|Mycobacteriaceae|Mycobacterium|Mycobacterium phlei|Mycobacterium phlei RIVM601174	0	0	0	0	0	0	0	0	0	0	0	0	0	0	0	0	0	0	0	0	0	0
Bacteria|Actinobacteria|Actinobacteridae|Actinomycetales|Corynebacterineae|Mycobacteriaceae|Mycobacterium|Mycobacterium rhodesiae|Mycobacterium rhodesiae NBB3	0	0	0	1	0	2	0	0	0	0	1	2	0	0	0	0	0	0	0	0	0	0
Bacteria|Actinobacteria|Actinobacteridae|Actinomycetales|Corynebacterineae|Mycobacteriaceae|Mycobacterium|Mycobacterium smegmatis|Mycobacterium smegmatis str. MC2 155	0	0	0	0	0	0	0	0	0	0	0	0	0	0	0	0	0	0	0	0	0	0
Bacteria|Actinobacteria|Actinobacteridae|Actinomycetales|Corynebacterineae|Mycobacteriaceae|Mycobacterium|Mycobacterium sp. JDM601	0	0	0	0	0	0	0	0	0	0	0	0	0	0	0	0	0	0	0	0	0	0
Bacteria|Actinobacteria|Actinobacteridae|Actinomycetales|Corynebacterineae|Mycobacteriaceae|Mycobacterium|Mycobacterium sp. JLS	0	1	1	0	2	0	0	3	0	0	0	1	1	0	0	0	0	2	1	0	0	0
Bacteria|Actinobacteria|Actinobacteridae|Actinomycetales|Corynebacterineae|Mycobacteriaceae|Mycobacterium|Mycobacterium sp. KMS	0	0	0	0	0	0	0	0	0	0	0	0	0	0	0	0	0	0	0	0	0	0
Bacteria|Actinobacteria|Actinobacteridae|Actinomycetales|Corynebacterineae|Mycobacteriaceae|Mycobacterium|Mycobacterium sp. MCS	0	0	0	0	0	0	0	0	0	0	0	0	0	0	0	0	0	0	0	0	0	0
Bacteria|Actinobacteria|Actinobacteridae|Actinomycetales|Corynebacterineae|Mycobacteriaceae|Mycobacterium|Mycobacterium sp. MOTT36Y	0	0	0	0	0	0	1	0	0	0	0	0	0	0	0	0	0	0	0	0	0	0
Bacteria|Actinobacteria|Actinobacteridae|Actinomycetales|Corynebacterineae|Mycobacteriaceae|Mycobacterium|Mycobacterium thermoresistibile|Mycobacterium thermoresistibile ATCC 19527	0	0	0	0	0	0	0	0	0	0	0	0	0	0	0	0	0	0	0	0	0	0
Bacteria|Actinobacteria|Actinobacteridae|Actinomycetales|Corynebacterineae|Mycobacteriaceae|Mycobacterium|Mycobacterium tuberculosis complex|Mycobacterium africanum|Mycobacterium africanum GM041182	0	0	0	0	0	0	0	0	0	0	0	0	0	0	0	0	0	0	0	0	0	0
Bacteria|Actinobacteria|Actinobacteridae|Actinomycetales|Corynebacterineae|Mycobacteriaceae|Mycobacterium|Mycobacterium tuberculosis complex|Mycobacterium bovis|Mycobacterium bovis AF2122/97	0	0	0	0	0	0	0	0	0	0	0	0	0	0	0	0	0	0	0	0	0	0
Bacteria|Actinobacteria|Actinobacteridae|Actinomycetales|Corynebacterineae|Mycobacteriaceae|Mycobacterium|Mycobacterium tuberculosis complex|Mycobacterium bovis|Mycobacterium bovis BCG|Mycobacterium bovis BCG str. ATCC 35733	0	0	0	0	0	0	0	0	0	0	0	0	0	0	0	0	0	0	0	0	0	0
Bacteria|Actinobacteria|Actinobacteridae|Actinomycetales|Corynebacterineae|Mycobacteriaceae|Mycobacterium|Mycobacterium tuberculosis complex|Mycobacterium bovis|Mycobacterium bovis BCG|Mycobacterium bovis BCG str. ATCC 35740	0	0	0	0	0	0	0	0	0	0	0	0	0	0	0	0	0	0	0	0	0	0
Bacteria|Actinobacteria|Actinobacteridae|Actinomycetales|Corynebacterineae|Mycobacteriaceae|Mycobacterium|Mycobacterium tuberculosis complex|Mycobacterium bovis|Mycobacterium bovis BCG|Mycobacterium bovis BCG str. ATCC 35743	0	0	0	0	0	0	0	0	0	0	0	0	0	0	0	0	0	0	0	0	0	0
Bacteria|Actinobacteria|Actinobacteridae|Actinomycetales|Corynebacterineae|Mycobacteriaceae|Mycobacterium|Mycobacterium tuberculosis complex|Mycobacterium bovis|Mycobacterium bovis BCG|Mycobacterium bovis BCG str. China	0	0	0	0	0	0	0	0	0	0	0	0	0	0	0	0	0	0	0	0	0	0
Bacteria|Actinobacteria|Actinobacteridae|Actinomycetales|Corynebacterineae|Mycobacteriaceae|Mycobacterium|Mycobacterium tuberculosis complex|Mycobacterium bovis|Mycobacterium bovis BCG|Mycobacterium bovis BCG str. Mexico	0	0	0	0	0	0	0	0	0	0	0	0	0	0	0	0	0	0	0	0	0	0
Bacteria|Actinobacteria|Actinobacteridae|Actinomycetales|Corynebacterineae|Mycobacteriaceae|Mycobacterium|Mycobacterium tuberculosis complex|Mycobacterium bovis|Mycobacterium bovis BCG|Mycobacterium bovis BCG str. Pasteur 1173P2	0	0	0	0	0	0	0	0	0	0	0	0	0	0	0	0	0	0	0	0	0	0
Bacteria|Actinobacteria|Actinobacteridae|Actinomycetales|Corynebacterineae|Mycobacteriaceae|Mycobacterium|Mycobacterium tuberculosis complex|Mycobacterium bovis|Mycobacterium bovis BCG|Mycobacterium bovis BCG str. Tokyo 172	0	0	0	0	0	0	0	0	0	0	0	0	0	0	0	0	0	0	0	0	0	0
Bacteria|Actinobacteria|Actinobacteridae|Actinomycetales|Corynebacterineae|Mycobacteriaceae|Mycobacterium|Mycobacterium tuberculosis complex|Mycobacterium canettii|Mycobacterium canettii CIPT 140010059	0	0	0	0	0	0	0	0	0	0	0	0	0	0	0	0	0	0	0	0	0	0
Bacteria|Actinobacteria|Actinobacteridae|Actinomycetales|Corynebacterineae|Mycobacteriaceae|Mycobacterium|Mycobacterium tuberculosis complex|Mycobacterium tuberculosis|Mycobacterium tuberculosis 02_1987	0	0	0	0	0	0	0	0	0	0	0	0	0	0	0	0	0	0	0	0	0	0
Bacteria|Actinobacteria|Actinobacteridae|Actinomycetales|Corynebacterineae|Mycobacteriaceae|Mycobacterium|Mycobacterium tuberculosis complex|Mycobacterium tuberculosis|Mycobacterium tuberculosis 210	0	0	0	0	0	0	0	0	0	0	0	0	0	0	0	0	0	0	0	0	0	0
Bacteria|Actinobacteria|Actinobacteridae|Actinomycetales|Corynebacterineae|Mycobacteriaceae|Mycobacterium|Mycobacterium tuberculosis complex|Mycobacterium tuberculosis|Mycobacterium tuberculosis 94_M4241A	0	0	0	0	0	0	0	0	0	0	0	0	0	0	0	0	0	0	0	0	0	0
Bacteria|Actinobacteria|Actinobacteridae|Actinomycetales|Corynebacterineae|Mycobacteriaceae|Mycobacterium|Mycobacterium tuberculosis complex|Mycobacterium tuberculosis|Mycobacterium tuberculosis '98-R604 INH-RIF-EM'	0	0	0	0	0	0	0	0	0	0	0	0	0	0	0	0	0	0	0	0	0	0
Bacteria|Actinobacteria|Actinobacteridae|Actinomycetales|Corynebacterineae|Mycobacteriaceae|Mycobacterium|Mycobacterium tuberculosis complex|Mycobacterium tuberculosis|Mycobacterium tuberculosis BTB05-552	0	0	0	0	0	0	0	0	0	0	0	0	0	0	0	0	0	0	0	0	0	0
Bacteria|Actinobacteria|Actinobacteridae|Actinomycetales|Corynebacterineae|Mycobacteriaceae|Mycobacterium|Mycobacterium tuberculosis complex|Mycobacterium tuberculosis|Mycobacterium tuberculosis BTB05-559	0	0	0	0	0	0	0	0	0	0	0	0	0	0	0	0	0	0	0	0	0	0
Bacteria|Actinobacteria|Actinobacteridae|Actinomycetales|Corynebacterineae|Mycobacteriaceae|Mycobacterium|Mycobacterium tuberculosis complex|Mycobacterium tuberculosis|Mycobacterium tuberculosis C	0	0	0	0	0	0	0	0	0	0	0	0	0	0	0	0	0	0	0	0	0	0
Bacteria|Actinobacteria|Actinobacteridae|Actinomycetales|Corynebacterineae|Mycobacteriaceae|Mycobacterium|Mycobacterium tuberculosis complex|Mycobacterium tuberculosis|Mycobacterium tuberculosis CCDC5079	0	0	0	0	0	0	0	0	0	0	0	0	0	0	0	0	0	0	0	0	0	0
Bacteria|Actinobacteria|Actinobacteridae|Actinomycetales|Corynebacterineae|Mycobacteriaceae|Mycobacterium|Mycobacterium tuberculosis complex|Mycobacterium tuberculosis|Mycobacterium tuberculosis CCDC5180	0	0	0	0	0	0	0	0	0	0	0	0	0	0	0	0	0	0	0	0	0	0
Bacteria|Actinobacteria|Actinobacteridae|Actinomycetales|Corynebacterineae|Mycobacteriaceae|Mycobacterium|Mycobacterium tuberculosis complex|Mycobacterium tuberculosis|Mycobacterium tuberculosis CDC1551	0	0	0	0	0	0	0	0	0	0	0	0	0	0	0	0	0	0	0	0	0	0
Bacteria|Actinobacteria|Actinobacteridae|Actinomycetales|Corynebacterineae|Mycobacteriaceae|Mycobacterium|Mycobacterium tuberculosis complex|Mycobacterium tuberculosis|Mycobacterium tuberculosis CDC1551A	0	0	0	0	0	0	0	0	0	0	0	0	0	0	0	0	0	0	0	0	0	0
Bacteria|Actinobacteria|Actinobacteridae|Actinomycetales|Corynebacterineae|Mycobacteriaceae|Mycobacterium|Mycobacterium tuberculosis complex|Mycobacterium tuberculosis|Mycobacterium tuberculosis CPHL_A	0	0	0	0	0	0	0	0	0	0	0	0	0	0	0	0	0	0	0	0	0	0
Bacteria|Actinobacteria|Actinobacteridae|Actinomycetales|Corynebacterineae|Mycobacteriaceae|Mycobacterium|Mycobacterium tuberculosis complex|Mycobacterium tuberculosis|Mycobacterium tuberculosis CTRI-2	0	0	0	0	0	0	0	0	0	0	0	0	0	0	0	0	0	0	0	0	0	0
Bacteria|Actinobacteria|Actinobacteridae|Actinomycetales|Corynebacterineae|Mycobacteriaceae|Mycobacterium|Mycobacterium tuberculosis complex|Mycobacterium tuberculosis|Mycobacterium tuberculosis CTRI-4	0	0	0	0	0	0	0	0	0	0	0	0	0	0	0	0	0	0	0	0	0	0
Bacteria|Actinobacteria|Actinobacteridae|Actinomycetales|Corynebacterineae|Mycobacteriaceae|Mycobacterium|Mycobacterium tuberculosis complex|Mycobacterium tuberculosis|Mycobacterium tuberculosis EAS054	0	0	0	0	0	0	0	0	0	0	0	0	0	0	0	0	0	0	0	0	0	0
Bacteria|Actinobacteria|Actinobacteridae|Actinomycetales|Corynebacterineae|Mycobacteriaceae|Mycobacterium|Mycobacterium tuberculosis complex|Mycobacterium tuberculosis|Mycobacterium tuberculosis F11	0	0	0	0	0	0	0	0	0	0	0	0	0	0	0	0	0	0	0	0	0	0
Bacteria|Actinobacteria|Actinobacteridae|Actinomycetales|Corynebacterineae|Mycobacteriaceae|Mycobacterium|Mycobacterium tuberculosis complex|Mycobacterium tuberculosis|Mycobacterium tuberculosis GM 1503	0	0	0	0	0	0	0	0	0	0	0	0	0	0	0	0	0	0	0	0	0	0
Bacteria|Actinobacteria|Actinobacteridae|Actinomycetales|Corynebacterineae|Mycobacteriaceae|Mycobacterium|Mycobacterium tuberculosis complex|Mycobacterium tuberculosis|Mycobacterium tuberculosis H37Ra	0	0	0	2	2	0	0	0	0	0	1	0	0	0	0	0	1	0	0	0	0	0
Bacteria|Actinobacteria|Actinobacteridae|Actinomycetales|Corynebacterineae|Mycobacteriaceae|Mycobacterium|Mycobacterium tuberculosis complex|Mycobacterium tuberculosis|Mycobacterium tuberculosis H37Rv	0	0	0	0	0	0	0	0	0	0	0	0	0	0	0	0	0	0	0	0	0	0
Bacteria|Actinobacteria|Actinobacteridae|Actinomycetales|Corynebacterineae|Mycobacteriaceae|Mycobacterium|Mycobacterium tuberculosis complex|Mycobacterium tuberculosis|Mycobacterium tuberculosis HN878	0	0	0	0	0	0	0	0	0	0	0	0	0	0	0	0	0	0	0	0	0	0
Bacteria|Actinobacteria|Actinobacteridae|Actinomycetales|Corynebacterineae|Mycobacteriaceae|Mycobacterium|Mycobacterium tuberculosis complex|Mycobacterium tuberculosis|Mycobacterium tuberculosis K85	0	0	0	0	0	0	0	0	0	0	0	0	0	0	0	0	0	0	0	0	0	0
Bacteria|Actinobacteria|Actinobacteridae|Actinomycetales|Corynebacterineae|Mycobacteriaceae|Mycobacterium|Mycobacterium tuberculosis complex|Mycobacterium tuberculosis|Mycobacterium tuberculosis KZN 1435	0	0	0	0	0	0	0	0	0	0	0	0	0	0	0	0	0	0	0	0	0	0
Bacteria|Actinobacteria|Actinobacteridae|Actinomycetales|Corynebacterineae|Mycobacteriaceae|Mycobacterium|Mycobacterium tuberculosis complex|Mycobacterium tuberculosis|Mycobacterium tuberculosis KZN 4207	0	0	0	0	0	0	0	0	0	0	0	0	0	0	0	0	0	0	0	0	0	0
Bacteria|Actinobacteria|Actinobacteridae|Actinomycetales|Corynebacterineae|Mycobacteriaceae|Mycobacterium|Mycobacterium tuberculosis complex|Mycobacterium tuberculosis|Mycobacterium tuberculosis KZN 605	0	0	0	0	0	0	0	0	0	0	0	0	0	0	0	0	0	0	0	0	0	0
Bacteria|Actinobacteria|Actinobacteridae|Actinomycetales|Corynebacterineae|Mycobacteriaceae|Mycobacterium|Mycobacterium tuberculosis complex|Mycobacterium tuberculosis|Mycobacterium tuberculosis KZN R506	0	0	0	0	0	0	0	0	0	0	0	0	0	0	0	0	0	0	0	0	0	0
Bacteria|Actinobacteria|Actinobacteridae|Actinomycetales|Corynebacterineae|Mycobacteriaceae|Mycobacterium|Mycobacterium tuberculosis complex|Mycobacterium tuberculosis|Mycobacterium tuberculosis KZN V2475	0	0	0	0	0	0	0	0	0	0	0	0	0	0	0	0	0	0	0	0	0	0
Bacteria|Actinobacteria|Actinobacteridae|Actinomycetales|Corynebacterineae|Mycobacteriaceae|Mycobacterium|Mycobacterium tuberculosis complex|Mycobacterium tuberculosis|Mycobacterium tuberculosis OSDD071	0	0	0	0	0	0	0	0	0	0	0	0	0	0	0	0	0	0	0	0	0	0
Bacteria|Actinobacteria|Actinobacteridae|Actinomycetales|Corynebacterineae|Mycobacteriaceae|Mycobacterium|Mycobacterium tuberculosis complex|Mycobacterium tuberculosis|Mycobacterium tuberculosis OSDD504	0	0	0	0	0	0	0	0	0	0	0	0	0	0	0	0	0	0	0	0	0	0
Bacteria|Actinobacteria|Actinobacteridae|Actinomycetales|Corynebacterineae|Mycobacteriaceae|Mycobacterium|Mycobacterium tuberculosis complex|Mycobacterium tuberculosis|Mycobacterium tuberculosis OSDD518	0	0	0	0	0	0	0	0	0	0	0	0	0	0	0	0	0	0	0	0	0	0
Bacteria|Actinobacteria|Actinobacteridae|Actinomycetales|Corynebacterineae|Mycobacteriaceae|Mycobacterium|Mycobacterium tuberculosis complex|Mycobacterium tuberculosis|Mycobacterium tuberculosis R1207	0	0	0	0	0	0	0	0	0	0	0	0	0	0	0	0	0	0	0	0	0	0
Bacteria|Actinobacteria|Actinobacteridae|Actinomycetales|Corynebacterineae|Mycobacteriaceae|Mycobacterium|Mycobacterium tuberculosis complex|Mycobacterium tuberculosis|Mycobacterium tuberculosis RGTB327	0	0	0	0	0	0	0	0	0	0	0	0	0	0	0	0	0	0	0	0	0	0
Bacteria|Actinobacteria|Actinobacteridae|Actinomycetales|Corynebacterineae|Mycobacteriaceae|Mycobacterium|Mycobacterium tuberculosis complex|Mycobacterium tuberculosis|Mycobacterium tuberculosis RGTB423	0	0	0	0	0	0	0	0	0	0	0	0	0	0	0	0	0	0	0	0	0	0
Bacteria|Actinobacteria|Actinobacteridae|Actinomycetales|Corynebacterineae|Mycobacteriaceae|Mycobacterium|Mycobacterium tuberculosis complex|Mycobacterium tuberculosis|Mycobacterium tuberculosis S96-129	0	0	0	0	0	0	0	0	0	0	0	0	0	0	0	0	0	0	0	0	0	0
Bacteria|Actinobacteria|Actinobacteridae|Actinomycetales|Corynebacterineae|Mycobacteriaceae|Mycobacterium|Mycobacterium tuberculosis complex|Mycobacterium tuberculosis|Mycobacterium tuberculosis str. Haarlem	0	0	0	0	0	0	0	0	0	0	0	0	0	0	0	0	0	0	0	0	0	0
Bacteria|Actinobacteria|Actinobacteridae|Actinomycetales|Corynebacterineae|Mycobacteriaceae|Mycobacterium|Mycobacterium tuberculosis complex|Mycobacterium tuberculosis|Mycobacterium tuberculosis SUMu001	0	0	0	0	0	0	0	0	0	0	0	0	0	0	0	0	0	0	0	0	0	0
Bacteria|Actinobacteria|Actinobacteridae|Actinomycetales|Corynebacterineae|Mycobacteriaceae|Mycobacterium|Mycobacterium tuberculosis complex|Mycobacterium tuberculosis|Mycobacterium tuberculosis SUMu002	0	0	0	0	0	0	0	0	0	0	0	0	0	0	0	0	0	0	0	0	0	0
Bacteria|Actinobacteria|Actinobacteridae|Actinomycetales|Corynebacterineae|Mycobacteriaceae|Mycobacterium|Mycobacterium tuberculosis complex|Mycobacterium tuberculosis|Mycobacterium tuberculosis SUMu003	0	0	0	0	0	0	0	0	0	0	0	0	0	0	0	0	0	0	0	0	0	0
Bacteria|Actinobacteria|Actinobacteridae|Actinomycetales|Corynebacterineae|Mycobacteriaceae|Mycobacterium|Mycobacterium tuberculosis complex|Mycobacterium tuberculosis|Mycobacterium tuberculosis SUMu004	0	0	0	0	0	0	0	0	0	0	0	0	0	0	0	0	0	0	0	0	0	0
Bacteria|Actinobacteria|Actinobacteridae|Actinomycetales|Corynebacterineae|Mycobacteriaceae|Mycobacterium|Mycobacterium tuberculosis complex|Mycobacterium tuberculosis|Mycobacterium tuberculosis SUMu005	0	0	0	0	0	0	0	0	0	0	0	0	0	0	0	0	0	0	0	0	0	0
Bacteria|Actinobacteria|Actinobacteridae|Actinomycetales|Corynebacterineae|Mycobacteriaceae|Mycobacterium|Mycobacterium tuberculosis complex|Mycobacterium tuberculosis|Mycobacterium tuberculosis SUMu006	0	0	0	0	0	0	0	0	0	0	0	0	0	0	0	0	0	0	0	0	0	0
Bacteria|Actinobacteria|Actinobacteridae|Actinomycetales|Corynebacterineae|Mycobacteriaceae|Mycobacterium|Mycobacterium tuberculosis complex|Mycobacterium tuberculosis|Mycobacterium tuberculosis SUMu007	0	0	0	0	0	0	0	0	0	0	0	0	0	0	0	0	0	0	0	0	0	0
Bacteria|Actinobacteria|Actinobacteridae|Actinomycetales|Corynebacterineae|Mycobacteriaceae|Mycobacterium|Mycobacterium tuberculosis complex|Mycobacterium tuberculosis|Mycobacterium tuberculosis SUMu008	0	0	0	0	0	0	0	0	0	0	0	0	0	0	0	0	0	0	0	0	0	0
Bacteria|Actinobacteria|Actinobacteridae|Actinomycetales|Corynebacterineae|Mycobacteriaceae|Mycobacterium|Mycobacterium tuberculosis complex|Mycobacterium tuberculosis|Mycobacterium tuberculosis SUMu009	0	0	0	0	0	0	0	0	0	0	0	0	0	0	0	0	0	0	0	0	0	0
Bacteria|Actinobacteria|Actinobacteridae|Actinomycetales|Corynebacterineae|Mycobacteriaceae|Mycobacterium|Mycobacterium tuberculosis complex|Mycobacterium tuberculosis|Mycobacterium tuberculosis SUMu010	0	0	0	0	0	0	0	0	0	0	0	0	0	0	0	0	0	0	0	0	0	0
Bacteria|Actinobacteria|Actinobacteridae|Actinomycetales|Corynebacterineae|Mycobacteriaceae|Mycobacterium|Mycobacterium tuberculosis complex|Mycobacterium tuberculosis|Mycobacterium tuberculosis SUMu011	0	0	0	0	0	0	0	0	0	0	0	0	0	0	0	0	0	0	0	0	0	0
Bacteria|Actinobacteria|Actinobacteridae|Actinomycetales|Corynebacterineae|Mycobacteriaceae|Mycobacterium|Mycobacterium tuberculosis complex|Mycobacterium tuberculosis|Mycobacterium tuberculosis SUMu012	0	0	0	0	0	0	0	0	0	0	0	0	0	0	0	0	0	0	0	0	0	0
Bacteria|Actinobacteria|Actinobacteridae|Actinomycetales|Corynebacterineae|Mycobacteriaceae|Mycobacterium|Mycobacterium tuberculosis complex|Mycobacterium tuberculosis|Mycobacterium tuberculosis T17	0	0	0	0	0	0	0	0	0	0	0	0	0	0	0	0	0	0	0	0	0	0
Bacteria|Actinobacteria|Actinobacteridae|Actinomycetales|Corynebacterineae|Mycobacteriaceae|Mycobacterium|Mycobacterium tuberculosis complex|Mycobacterium tuberculosis|Mycobacterium tuberculosis T46	0	0	0	0	0	0	0	0	0	0	0	0	0	0	0	0	0	0	0	0	0	0
Bacteria|Actinobacteria|Actinobacteridae|Actinomycetales|Corynebacterineae|Mycobacteriaceae|Mycobacterium|Mycobacterium tuberculosis complex|Mycobacterium tuberculosis|Mycobacterium tuberculosis T85	0	0	0	0	0	0	0	0	0	0	0	0	0	0	0	0	0	0	0	0	0	0
Bacteria|Actinobacteria|Actinobacteridae|Actinomycetales|Corynebacterineae|Mycobacteriaceae|Mycobacterium|Mycobacterium tuberculosis complex|Mycobacterium tuberculosis|Mycobacterium tuberculosis T92	0	0	0	0	0	0	0	0	0	0	0	0	0	0	0	0	0	0	0	0	0	0
Bacteria|Actinobacteria|Actinobacteridae|Actinomycetales|Corynebacterineae|Mycobacteriaceae|Mycobacterium|Mycobacterium tuberculosis complex|Mycobacterium tuberculosis|Mycobacterium tuberculosis UT205	0	0	0	0	0	0	0	0	0	0	0	0	0	0	0	0	0	0	0	0	0	0
Bacteria|Actinobacteria|Actinobacteridae|Actinomycetales|Corynebacterineae|Mycobacteriaceae|Mycobacterium|Mycobacterium tuberculosis complex|Mycobacterium tuberculosis|Mycobacterium tuberculosis W-148	0	0	0	0	0	0	0	0	0	0	0	0	0	0	0	0	0	0	0	0	0	0
Bacteria|Actinobacteria|Actinobacteridae|Actinomycetales|Corynebacterineae|Mycobacteriaceae|Mycobacterium|Mycobacterium tuberculosis complex|Mycobacterium tuberculosis|Mycobacterium tuberculosis X122	0	0	0	0	0	0	0	0	0	0	0	0	0	0	0	0	0	0	0	0	0	0
Bacteria|Actinobacteria|Actinobacteridae|Actinomycetales|Corynebacterineae|Mycobacteriaceae|Mycobacterium|Mycobacterium tusciae|Mycobacterium tusciae JS617	0	0	0	0	0	0	0	0	0	0	0	0	0	0	0	0	0	0	0	0	0	0
Bacteria|Actinobacteria|Actinobacteridae|Actinomycetales|Corynebacterineae|Mycobacteriaceae|Mycobacterium|Mycobacterium ulcerans|Mycobacterium ulcerans Agy99	0	0	0	0	0	0	0	0	0	0	0	0	0	0	0	0	0	0	0	0	0	0
Bacteria|Actinobacteria|Actinobacteridae|Actinomycetales|Corynebacterineae|Mycobacteriaceae|Mycobacterium|Mycobacterium vanbaalenii|Mycobacterium vanbaalenii PYR-1	0	0	1	1	1	10	0	9	0	0	7	1	0	1	0	0	0	3	1	3	0	8
Bacteria|Actinobacteria|Actinobacteridae|Actinomycetales|Corynebacterineae|Mycobacteriaceae|Mycobacterium|Mycobacterium xenopi|Mycobacterium xenopi RIVM700367	0	0	0	0	0	0	0	0	0	0	0	0	0	0	0	0	0	0	0	0	0	0
Bacteria|Actinobacteria|Actinobacteridae|Actinomycetales|Corynebacterineae|Nocardiaceae|Nocardia|Nocardia brasiliensis|Nocardia brasiliensis ATCC 700358	0	0	0	0	0	0	0	0	0	0	0	0	0	0	0	0	0	0	0	0	0	0
Bacteria|Actinobacteria|Actinobacteridae|Actinomycetales|Corynebacterineae|Nocardiaceae|Nocardia|Nocardia cyriacigeorgica|Nocardia cyriacigeorgica GUH-2	0	0	0	0	0	0	0	2	0	0	0	0	0	0	0	0	0	0	0	0	0	1
Bacteria|Actinobacteria|Actinobacteridae|Actinomycetales|Corynebacterineae|Nocardiaceae|Nocardia|Nocardia farcinica|Nocardia farcinica IFM 10152	0	0	0	1	0	0	0	0	0	0	0	0	0	0	0	0	0	1	0	0	0	0
Bacteria|Actinobacteria|Actinobacteridae|Actinomycetales|Corynebacterineae|Nocardiaceae|Rhodococcus|Rhodococcus equi|Rhodococcus equi 103S	0	0	0	0	1	0	0	0	0	0	0	0	0	0	0	0	0	0	0	0	0	0
Bacteria|Actinobacteria|Actinobacteridae|Actinomycetales|Corynebacterineae|Nocardiaceae|Rhodococcus|Rhodococcus equi|Rhodococcus equi ATCC 33707	0	0	0	0	0	0	0	0	0	0	0	0	0	0	0	0	0	0	0	0	0	0
Bacteria|Actinobacteria|Actinobacteridae|Actinomycetales|Corynebacterineae|Nocardiaceae|Rhodococcus|Rhodococcus erythropolis|Rhodococcus erythropolis PR4	0	0	0	0	0	0	0	0	0	0	0	0	0	0	0	0	0	0	0	0	0	0
Bacteria|Actinobacteria|Actinobacteridae|Actinomycetales|Corynebacterineae|Nocardiaceae|Rhodococcus|Rhodococcus erythropolis|Rhodococcus erythropolis SK121	0	0	0	0	0	0	2	0	0	0	0	0	0	0	0	0	0	0	0	0	0	0
Bacteria|Actinobacteria|Actinobacteridae|Actinomycetales|Corynebacterineae|Nocardiaceae|Rhodococcus|Rhodococcus imtechensis|Rhodococcus imtechensis RKJ300 = JCM 13270	0	0	0	0	0	0	0	0	0	0	0	0	0	0	0	0	0	0	0	0	0	0
Bacteria|Actinobacteria|Actinobacteridae|Actinomycetales|Corynebacterineae|Nocardiaceae|Rhodococcus|Rhodococcus jostii|Rhodococcus jostii RHA1	0	0	0	0	0	0	0	0	0	0	0	0	0	0	0	0	0	0	0	0	0	0
Bacteria|Actinobacteria|Actinobacteridae|Actinomycetales|Corynebacterineae|Nocardiaceae|Rhodococcus|Rhodococcus opacus|Rhodococcus opacus B4	0	0	0	0	0	0	0	0	0	0	0	0	0	0	0	0	0	0	0	0	0	0
Bacteria|Actinobacteria|Actinobacteridae|Actinomycetales|Corynebacterineae|Nocardiaceae|Rhodococcus|Rhodococcus pyridinivorans|Rhodococcus pyridinivorans AK37	14	10	17	5	7	1	4	5	0	1	3	3	0	5	0	1	13	7	0	0	0	1
Bacteria|Actinobacteria|Actinobacteridae|Actinomycetales|Corynebacterineae|Segniliparaceae|Segniliparus|Segniliparus rotundus|Segniliparus rotundus DSM 44985	0	0	0	0	0	0	0	0	0	0	0	0	0	0	0	0	0	0	0	0	0	0
Bacteria|Actinobacteria|Actinobacteridae|Actinomycetales|Corynebacterineae|Segniliparaceae|Segniliparus|Segniliparus rugosus|Segniliparus rugosus ATCC BAA-974	0	0	0	0	0	0	0	0	0	0	0	0	0	0	0	0	0	0	0	0	0	0
Bacteria|Actinobacteria|Actinobacteridae|Actinomycetales|Corynebacterineae|Tsukamurellaceae|Tsukamurella|Tsukamurella paurometabola|Tsukamurella paurometabola DSM 20162	0	0	0	0	0	0	0	0	0	0	0	0	0	0	0	0	0	0	0	0	0	0
Bacteria|Actinobacteria|Actinobacteridae|Actinomycetales|Frankineae|Acidothermaceae|Acidothermus|Acidothermus cellulolyticus|Acidothermus cellulolyticus 11B	0	0	0	0	0	0	0	0	0	0	0	0	0	0	0	0	0	0	0	0	0	0
Bacteria|Actinobacteria|Actinobacteridae|Actinomycetales|Frankineae|Frankiaceae|Frankia|Frankia alni|Frankia alni ACN14a	0	0	0	0	0	0	0	0	0	0	0	0	0	0	0	0	0	0	0	0	0	0
Bacteria|Actinobacteria|Actinobacteridae|Actinomycetales|Frankineae|Frankiaceae|Frankia|Frankia sp. CcI3	0	0	0	0	0	0	0	0	0	0	0	0	0	0	0	0	0	0	0	0	0	0
Bacteria|Actinobacteria|Actinobacteridae|Actinomycetales|Frankineae|Frankiaceae|Frankia|Frankia sp. CN3	0	0	0	0	0	0	0	0	0	0	0	0	0	0	0	0	0	0	0	0	0	0
Bacteria|Actinobacteria|Actinobacteridae|Actinomycetales|Frankineae|Frankiaceae|Frankia|Frankia sp. EAN1pec	0	0	0	0	0	0	0	0	0	0	0	0	0	0	0	0	0	0	0	0	0	0
Bacteria|Actinobacteria|Actinobacteridae|Actinomycetales|Frankineae|Frankiaceae|Frankia|Frankia sp. EuI1c	0	0	0	0	0	0	0	0	0	0	0	0	0	0	0	0	0	0	0	0	0	0
Bacteria|Actinobacteria|Actinobacteridae|Actinomycetales|Frankineae|Frankiaceae|Frankia|Frankia sp. EUN1f	0	0	0	0	0	0	0	0	0	0	0	0	0	0	0	0	0	0	0	0	0	0
Bacteria|Actinobacteria|Actinobacteridae|Actinomycetales|Frankineae|Frankiaceae|Frankia|Frankia symbiont of Datisca glomerata	0	0	0	0	0	0	0	0	0	0	0	0	0	0	0	0	0	0	0	0	0	0
Bacteria|Actinobacteria|Actinobacteridae|Actinomycetales|Frankineae|Geodermatophilaceae|Blastococcus|Blastococcus saxobsidens|Blastococcus saxobsidens DD2	0	0	0	0	0	0	0	0	0	0	0	0	0	0	0	0	0	0	0	0	0	0
Bacteria|Actinobacteria|Actinobacteridae|Actinomycetales|Frankineae|Geodermatophilaceae|Geodermatophilus|Geodermatophilus obscurus|Geodermatophilus obscurus DSM 43160	0	0	0	0	0	0	0	1	0	0	0	0	0	0	0	0	0	0	0	0	0	0
Bacteria|Actinobacteria|Actinobacteridae|Actinomycetales|Frankineae|Geodermatophilaceae|Modestobacter|Modestobacter marinus	0	0	0	0	0	0	0	0	0	0	0	0	0	0	0	0	0	0	0	0	0	0
Bacteria|Actinobacteria|Actinobacteridae|Actinomycetales|Frankineae|Nakamurellaceae|Nakamurella|Nakamurella multipartita|Nakamurella multipartita DSM 44233	6	2	1	0	0	0	1	17	0	0	0	0	0	0	0	0	0	0	0	0	0	0
Bacteria|Actinobacteria|Actinobacteridae|Actinomycetales|Glycomycineae|Glycomycetaceae|Stackebrandtia|Stackebrandtia nassauensis|Stackebrandtia nassauensis DSM 44728	0	0	0	0	0	0	0	0	0	0	0	0	0	0	0	0	0	0	0	0	0	0
Bacteria|Actinobacteria|Actinobacteridae|Actinomycetales|Kineosporiineae|Kineosporiaceae|Kineococcus|Kineococcus radiotolerans|Kineococcus radiotolerans SRS30216 = ATCC BAA-149	0	0	0	0	0	0	0	0	0	0	0	0	0	0	0	0	0	0	0	0	0	0
Bacteria|Actinobacteria|Actinobacteridae|Actinomycetales|Micrococcineae|Beutenbergiaceae|Beutenbergia|Beutenbergia cavernae|Beutenbergia cavernae DSM 12333	0	0	0	0	0	0	0	0	0	0	0	0	0	0	0	0	0	0	0	0	0	0
Bacteria|Actinobacteria|Actinobacteridae|Actinomycetales|Micrococcineae|Brevibacteriaceae|Brevibacterium|Brevibacterium linens|Brevibacterium linens BL2	0	2	0	0	0	0	0	0	0	0	0	1	0	0	0	0	1	0	0	0	0	0
Bacteria|Actinobacteria|Actinobacteridae|Actinomycetales|Micrococcineae|Brevibacteriaceae|Brevibacterium|Brevibacterium mcbrellneri|Brevibacterium mcbrellneri ATCC 49030	22	13	15	6	3	0	0	12	0	0	1	2	0	1	0	0	10	22	1	0	0	0
Bacteria|Actinobacteria|Actinobacteridae|Actinomycetales|Micrococcineae|Cellulomonadaceae|Cellulomonas|[Cellvibrio] gilvus|[Cellvibrio] gilvus ATCC 13127	0	0	0	0	0	0	1	0	0	0	0	0	0	0	0	0	0	0	0	0	0	0
Bacteria|Actinobacteria|Actinobacteridae|Actinomycetales|Micrococcineae|Cellulomonadaceae|Cellulomonas|Cellulomonas fimi|Cellulomonas fimi ATCC 484	0	0	0	0	0	0	0	0	0	0	1	0	0	0	0	0	0	0	0	0	0	0
Bacteria|Actinobacteria|Actinobacteridae|Actinomycetales|Micrococcineae|Cellulomonadaceae|Cellulomonas|Cellulomonas flavigena|Cellulomonas flavigena DSM 20109	0	0	0	0	0	0	0	0	0	0	0	0	0	0	0	0	0	0	0	0	0	0
Bacteria|Actinobacteria|Actinobacteridae|Actinomycetales|Micrococcineae|Dermabacteraceae|Brachybacterium|Brachybacterium faecium|Brachybacterium faecium DSM 4810	1	0	0	0	0	0	0	0	0	0	0	0	0	0	0	0	0	2	0	0	0	0
Bacteria|Actinobacteria|Actinobacteridae|Actinomycetales|Micrococcineae|Dermabacteraceae|Brachybacterium|Brachybacterium paraconglomeratum|Brachybacterium paraconglomeratum LC44	10	4	2	4	8	0	0	2	0	0	1	0	0	2	0	0	2	19	0	0	0	0
Bacteria|Actinobacteria|Actinobacteridae|Actinomycetales|Micrococcineae|Dermabacteraceae|Brachybacterium|Brachybacterium squillarum|Brachybacterium squillarum M-6-3	6	3	3	2	3	0	0	7	0	0	0	0	0	0	0	0	5	3	0	0	0	0
Bacteria|Actinobacteria|Actinobacteridae|Actinomycetales|Micrococcineae|Dermacoccaceae|Dermacoccus|Dermacoccus sp. Ellin185	1	0	1	0	0	0	0	1	0	0	0	0	0	0	0	0	2	0	0	0	0	0
Bacteria|Actinobacteria|Actinobacteridae|Actinomycetales|Micrococcineae|Dermacoccaceae|Kytococcus|Kytococcus sedentarius|Kytococcus sedentarius DSM 20547	11	4	4	2	6	0	0	4	0	0	1	0	0	1	0	0	3	5	0	1	0	0
Bacteria|Actinobacteria|Actinobacteridae|Actinomycetales|Micrococcineae|Dermatophilaceae|Mobilicoccus|Mobilicoccus pelagius|Mobilicoccus pelagius NBRC 104925	1	2	0	2	0	0	0	0	0	0	0	0	0	0	0	0	0	0	0	0	0	0
Bacteria|Actinobacteria|Actinobacteridae|Actinomycetales|Micrococcineae|Intrasporangiaceae|Intrasporangium|Intrasporangium calvum|Intrasporangium calvum DSM 43043	0	0	1	0	0	0	0	0	1	0	0	0	0	0	0	0	0	1	0	0	0	0
Bacteria|Actinobacteria|Actinobacteridae|Actinomycetales|Micrococcineae|Intrasporangiaceae|Janibacter|Janibacter sp. HTCC2649	0	0	1	0	1	0	1	1	0	0	0	4	0	0	0	0	0	5	0	0	0	0
Bacteria|Actinobacteria|Actinobacteridae|Actinomycetales|Micrococcineae|Intrasporangiaceae|Serinicoccus|Serinicoccus profundi|Serinicoccus profundi MCCC 1A05965	29	10	14	15	11	0	1	6	0	1	2	0	0	1	0	0	11	40	0	0	0	0
Bacteria|Actinobacteria|Actinobacteridae|Actinomycetales|Micrococcineae|Jonesiaceae|Jonesia|Jonesia denitrificans|Jonesia denitrificans DSM 20603	26	9	16	24	17	0	0	1	0	0	2	0	0	2	0	0	3	7	0	0	0	0
Bacteria|Actinobacteria|Actinobacteridae|Actinomycetales|Micrococcineae|Microbacteriaceae|Candidatus Aquiluna|Candidatus Aquiluna sp. IMCC13023	0	0	0	0	0	0	0	0	0	0	0	0	0	0	0	0	0	0	0	0	0	0
Bacteria|Actinobacteria|Actinobacteridae|Actinomycetales|Micrococcineae|Microbacteriaceae|Clavibacter|Clavibacter michiganensis|Clavibacter michiganensis subsp. michiganensis|Clavibacter michiganensis subsp. michiganensis NCPPB 382	0	0	0	0	0	0	0	0	0	0	0	0	0	0	0	0	0	0	0	0	0	0
Bacteria|Actinobacteria|Actinobacteridae|Actinomycetales|Micrococcineae|Microbacteriaceae|Clavibacter|Clavibacter michiganensis|Clavibacter michiganensis subsp. sepedonicus	0	0	0	0	0	0	0	0	0	0	0	0	0	0	0	0	0	0	0	0	0	0
Bacteria|Actinobacteria|Actinobacteridae|Actinomycetales|Micrococcineae|Microbacteriaceae|Leifsonia|Leifsonia xyli|Leifsonia xyli subsp. xyli|Leifsonia xyli subsp. xyli str. CTCB07	0	0	0	0	0	0	0	0	0	0	0	0	0	0	0	0	0	0	0	0	0	0
Bacteria|Actinobacteria|Actinobacteridae|Actinomycetales|Micrococcineae|Microbacteriaceae|Leucobacter|Leucobacter chromiiresistens|Leucobacter chromiiresistens JG 31	1	3	4	2	0	0	0	4	0	0	0	0	0	1	0	0	4	2	0	0	0	0
Bacteria|Actinobacteria|Actinobacteridae|Actinomycetales|Micrococcineae|Microbacteriaceae|Microbacterium|Microbacterium laevaniformans|Microbacterium laevaniformans OR221	5	2	4	2	1	1	1	8	2	0	0	3	0	0	0	0	3	1	0	0	0	0
Bacteria|Actinobacteria|Actinobacteridae|Actinomycetales|Micrococcineae|Microbacteriaceae|Microbacterium|Microbacterium testaceum|Microbacterium testaceum StLB037	3	0	0	0	0	0	0	1	0	0	1	1	0	2	1	1	1	4	0	0	0	0
Bacteria|Actinobacteria|Actinobacteridae|Actinomycetales|Micrococcineae|Micrococcaceae|Arthrobacter|Arthrobacter arilaitensis|Arthrobacter arilaitensis Re117	14	7	10	1	4	2	0	2	0	0	0	1	0	2	0	0	3	6	1	0	0	0
Bacteria|Actinobacteria|Actinobacteridae|Actinomycetales|Micrococcineae|Micrococcaceae|Arthrobacter|Arthrobacter aurescens|Arthrobacter aurescens TC1	0	0	0	0	0	0	0	0	0	0	0	0	0	0	0	0	0	2	0	0	0	0
Bacteria|Actinobacteria|Actinobacteridae|Actinomycetales|Micrococcineae|Micrococcaceae|Arthrobacter|Arthrobacter chlorophenolicus|Arthrobacter chlorophenolicus A6	0	1	0	0	0	0	0	1	0	0	0	2	0	0	0	0	0	2	0	0	0	0
Bacteria|Actinobacteria|Actinobacteridae|Actinomycetales|Micrococcineae|Micrococcaceae|Arthrobacter|Arthrobacter globiformis|Arthrobacter globiformis NBRC 12137	0	0	0	0	0	0	0	0	0	0	0	0	0	0	0	0	0	2	0	0	0	0
Bacteria|Actinobacteria|Actinobacteridae|Actinomycetales|Micrococcineae|Micrococcaceae|Arthrobacter|Arthrobacter phenanthrenivorans|Arthrobacter phenanthrenivorans Sphe3	11	10	9	5	3	1	1	15	0	0	0	3	0	1	0	0	13	2	0	0	0	0
Bacteria|Actinobacteria|Actinobacteridae|Actinomycetales|Micrococcineae|Micrococcaceae|Arthrobacter|Arthrobacter sp. FB24	0	0	0	0	0	0	0	0	0	0	0	0	0	0	0	0	0	0	0	0	0	0
Bacteria|Actinobacteria|Actinobacteridae|Actinomycetales|Micrococcineae|Micrococcaceae|Arthrobacter|Arthrobacter sp. Rue61a	0	0	0	0	0	0	0	0	0	0	0	0	0	0	0	0	0	0	0	0	0	0
Bacteria|Actinobacteria|Actinobacteridae|Actinomycetales|Micrococcineae|Micrococcaceae|Citricoccus|Citricoccus sp. CH26A	2	0	2	0	3	0	0	1	0	0	1	0	0	0	0	0	0	1	0	0	0	0
Bacteria|Actinobacteria|Actinobacteridae|Actinomycetales|Micrococcineae|Micrococcaceae|Kocuria|Kocuria rhizophila|Kocuria rhizophila DC2201	9	8	6	2	2	0	0	0	0	0	0	0	0	0	0	0	7	1	0	0	0	0
Bacteria|Actinobacteria|Actinobacteridae|Actinomycetales|Micrococcineae|Micrococcaceae|Micrococcus|Micrococcus luteus|Micrococcus luteus NCTC 2665	19	6	10	4	1	0	0	11	0	0	1	0	0	0	0	0	3	7	0	0	0	0
Bacteria|Actinobacteria|Actinobacteridae|Actinomycetales|Micrococcineae|Micrococcaceae|Micrococcus|Micrococcus luteus|Micrococcus luteus SK58	1	0	0	1	0	0	0	3	0	0	0	0	0	0	0	0	0	1	0	0	0	0
Bacteria|Actinobacteria|Actinobacteridae|Actinomycetales|Micrococcineae|Micrococcaceae|Nesterenkonia|Nesterenkonia sp. F	0	0	0	0	0	0	0	0	0	0	0	0	0	0	0	0	0	0	0	0	0	0
Bacteria|Actinobacteria|Actinobacteridae|Actinomycetales|Micrococcineae|Micrococcaceae|Renibacterium|Renibacterium salmoninarum|Renibacterium salmoninarum ATCC 33209	0	0	0	0	0	0	0	0	0	0	0	0	0	0	0	0	0	0	0	0	0	0
Bacteria|Actinobacteria|Actinobacteridae|Actinomycetales|Micrococcineae|Micrococcaceae|Rothia|Rothia aeria|Rothia aeria F0474	1	0	0	0	0	0	0	2	0	0	0	0	0	0	0	0	1	0	0	0	0	0
Bacteria|Actinobacteria|Actinobacteridae|Actinomycetales|Micrococcineae|Micrococcaceae|Rothia|Rothia dentocariosa|Rothia dentocariosa ATCC 17931	0	0	0	0	0	0	0	1	0	0	0	0	0	0	0	0	0	0	0	0	0	0
Bacteria|Actinobacteria|Actinobacteridae|Actinomycetales|Micrococcineae|Micrococcaceae|Rothia|Rothia dentocariosa|Rothia dentocariosa M567	0	0	0	0	0	0	0	0	0	0	0	0	0	0	0	0	0	0	0	0	0	0
Bacteria|Actinobacteria|Actinobacteridae|Actinomycetales|Micrococcineae|Micrococcaceae|Rothia|Rothia mucilaginosa|Rothia mucilaginosa ATCC 25296	0	0	0	0	0	0	0	2	0	0	0	0	0	0	0	0	0	0	0	0	0	0
Bacteria|Actinobacteria|Actinobacteridae|Actinomycetales|Micrococcineae|Micrococcaceae|Rothia|Rothia mucilaginosa|Rothia mucilaginosa DY-18	0	0	1	0	0	0	0	1	0	0	0	0	0	0	0	0	0	0	0	0	0	0
Bacteria|Actinobacteria|Actinobacteridae|Actinomycetales|Micrococcineae|Micrococcaceae|Rothia|Rothia mucilaginosa|Rothia mucilaginosa M508	0	0	0	0	0	0	0	0	0	0	0	0	0	0	0	0	0	0	0	0	0	0
Bacteria|Actinobacteria|Actinobacteridae|Actinomycetales|Micrococcineae|Promicromonosporaceae|Isoptericola|Isoptericola variabilis|Isoptericola variabilis 225	0	0	0	0	0	0	0	0	0	0	0	0	0	0	0	0	0	0	0	0	0	0
Bacteria|Actinobacteria|Actinobacteridae|Actinomycetales|Micrococcineae|Promicromonosporaceae|Xylanimonas|Xylanimonas cellulosilytica|Xylanimonas cellulosilytica DSM 15894	0	0	0	0	0	0	0	0	0	0	0	0	0	0	0	0	0	0	0	0	0	0
Bacteria|Actinobacteria|Actinobacteridae|Actinomycetales|Micrococcineae|Sanguibacteraceae|Sanguibacter|Sanguibacter keddieii|Sanguibacter keddieii DSM 10542	0	0	0	0	0	0	0	0	0	0	0	0	0	2	1	0	1	0	0	0	0	0
Bacteria|Actinobacteria|Actinobacteridae|Actinomycetales|Micrococcineae|unclassified Micrococcineae|Tropheryma|Tropheryma whipplei|Tropheryma whipplei str. Twist	0	0	0	0	0	0	0	0	0	0	0	0	0	0	0	0	0	0	0	0	0	0
Bacteria|Actinobacteria|Actinobacteridae|Actinomycetales|Micrococcineae|unclassified Micrococcineae|Tropheryma|Tropheryma whipplei|Tropheryma whipplei TW08/27	0	0	0	0	0	0	0	0	0	0	0	0	0	0	0	0	0	0	0	0	0	0
Bacteria|Actinobacteria|Actinobacteridae|Actinomycetales|Micromonosporineae|Micromonosporaceae|Actinoplanes|Actinoplanes missouriensis|Actinoplanes missouriensis 431	0	0	0	0	0	0	0	0	0	0	0	0	0	0	0	0	0	1	0	0	0	0
Bacteria|Actinobacteria|Actinobacteridae|Actinomycetales|Micromonosporineae|Micromonosporaceae|Actinoplanes|Actinoplanes sp. SE50/110	0	0	0	0	0	0	0	0	0	0	0	0	0	0	0	0	0	0	0	0	0	0
Bacteria|Actinobacteria|Actinobacteridae|Actinomycetales|Micromonosporineae|Micromonosporaceae|Micromonospora|Micromonospora aurantiaca|Micromonospora aurantiaca ATCC 27029	0	0	0	0	0	0	0	0	0	0	0	0	0	0	0	0	0	0	0	0	0	0
Bacteria|Actinobacteria|Actinobacteridae|Actinomycetales|Micromonosporineae|Micromonosporaceae|Micromonospora|Micromonospora lupini|Micromonospora lupini str. Lupac 08	0	0	0	0	0	0	0	0	0	0	0	0	0	0	0	0	0	0	0	0	0	0
Bacteria|Actinobacteria|Actinobacteridae|Actinomycetales|Micromonosporineae|Micromonosporaceae|Micromonospora|Micromonospora sp. ATCC 39149	0	0	0	0	0	0	0	0	0	0	0	0	0	0	0	0	0	0	0	0	0	0
Bacteria|Actinobacteria|Actinobacteridae|Actinomycetales|Micromonosporineae|Micromonosporaceae|Micromonospora|Micromonospora sp. L5	1	0	0	0	0	0	0	0	0	0	0	0	0	0	0	0	0	0	0	0	0	0
Bacteria|Actinobacteria|Actinobacteridae|Actinomycetales|Micromonosporineae|Micromonosporaceae|Salinispora|Salinispora arenicola|Salinispora arenicola CNS-205	0	0	0	0	0	0	0	0	0	0	0	0	0	0	0	0	0	0	0	0	0	0
Bacteria|Actinobacteria|Actinobacteridae|Actinomycetales|Micromonosporineae|Micromonosporaceae|Salinispora|Salinispora tropica|Salinispora tropica CNB-440	0	0	0	0	0	0	0	0	0	0	0	0	0	0	0	0	0	0	0	0	0	0
Bacteria|Actinobacteria|Actinobacteridae|Actinomycetales|Micromonosporineae|Micromonosporaceae|Verrucosispora|Verrucosispora maris|Verrucosispora maris AB-18-032	0	0	0	0	0	0	0	0	0	0	0	0	0	0	0	0	0	1	0	0	0	0
Bacteria|Actinobacteria|Actinobacteridae|Actinomycetales|Propionibacterineae|Nocardioidaceae|Aeromicrobium|Aeromicrobium marinum|Aeromicrobium marinum DSM 15272	0	0	1	0	1	0	0	1	0	0	0	0	0	0	0	0	0	0	0	0	0	0
Bacteria|Actinobacteria|Actinobacteridae|Actinomycetales|Propionibacterineae|Nocardioidaceae|Aeromicrobium|Aeromicrobium massiliense|Aeromicrobium massiliense JC14	0	0	0	0	0	0	0	0	0	0	0	0	0	0	0	0	0	0	0	0	0	0
Bacteria|Actinobacteria|Actinobacteridae|Actinomycetales|Propionibacterineae|Nocardioidaceae|Kribbella|Kribbella flavida|Kribbella flavida DSM 17836	0	0	0	0	0	0	0	0	0	0	0	0	0	0	0	0	0	0	0	0	0	0
Bacteria|Actinobacteria|Actinobacteridae|Actinomycetales|Propionibacterineae|Nocardioidaceae|Nocardioides|Nocardioides sp. JS614	1	1	0	1	1	0	0	2	0	0	0	0	0	0	0	0	0	2	0	0	0	0
Bacteria|Actinobacteria|Actinobacteridae|Actinomycetales|Propionibacterineae|Nocardioidaceae|unclassified Nocardioidaceae|Nocardioidaceae bacterium Broad-1	0	0	0	0	1	0	0	0	0	0	0	0	0	0	0	0	0	0	0	0	0	0
Bacteria|Actinobacteria|Actinobacteridae|Actinomycetales|Propionibacterineae|Propionibacteriaceae|Microlunatus|Microlunatus phosphovorus|Microlunatus phosphovorus NM-1	6	7	8	3	2	0	0	53	0	1	0	0	0	0	0	0	5	0	0	0	0	0
Bacteria|Actinobacteria|Actinobacteridae|Actinomycetales|Propionibacterineae|Propionibacteriaceae|Propionibacterium|Propionibacterium acidifaciens|Propionibacterium acidifaciens F0233	0	0	0	0	0	0	0	0	0	0	0	0	0	0	0	0	0	0	0	0	0	0
Bacteria|Actinobacteria|Actinobacteridae|Actinomycetales|Propionibacterineae|Propionibacteriaceae|Propionibacterium|Propionibacterium acnes|Propionibacterium acnes 266	0	0	0	0	0	0	0	0	0	0	0	0	0	0	0	0	0	0	0	0	0	0
Bacteria|Actinobacteria|Actinobacteridae|Actinomycetales|Propionibacterineae|Propionibacteriaceae|Propionibacterium|Propionibacterium acnes|Propionibacterium acnes 6609	0	0	0	0	0	0	0	0	0	0	0	0	0	0	0	0	0	0	0	0	0	0
Bacteria|Actinobacteria|Actinobacteridae|Actinomycetales|Propionibacterineae|Propionibacteriaceae|Propionibacterium|Propionibacterium acnes|Propionibacterium acnes ATCC 11828	0	0	0	0	0	0	0	0	0	0	0	0	0	0	0	0	0	0	0	0	0	0
Bacteria|Actinobacteria|Actinobacteridae|Actinomycetales|Propionibacterineae|Propionibacteriaceae|Propionibacterium|Propionibacterium acnes|Propionibacterium acnes HL001PA1	0	0	0	0	0	0	0	0	0	0	0	0	0	0	0	0	0	0	0	0	0	0
Bacteria|Actinobacteria|Actinobacteridae|Actinomycetales|Propionibacterineae|Propionibacteriaceae|Propionibacterium|Propionibacterium acnes|Propionibacterium acnes HL002PA1	0	0	0	0	0	0	0	0	0	0	0	0	0	0	0	0	0	0	0	0	0	0
Bacteria|Actinobacteria|Actinobacteridae|Actinomycetales|Propionibacterineae|Propionibacteriaceae|Propionibacterium|Propionibacterium acnes|Propionibacterium acnes HL002PA2	0	0	0	0	0	0	0	0	0	0	0	0	0	0	0	0	0	0	0	0	0	0
Bacteria|Actinobacteria|Actinobacteridae|Actinomycetales|Propionibacterineae|Propionibacteriaceae|Propionibacterium|Propionibacterium acnes|Propionibacterium acnes HL002PA3	0	0	0	0	0	0	0	0	0	0	0	0	0	0	0	0	0	0	0	0	0	0
Bacteria|Actinobacteria|Actinobacteridae|Actinomycetales|Propionibacterineae|Propionibacteriaceae|Propionibacterium|Propionibacterium acnes|Propionibacterium acnes HL005PA1	0	0	0	0	0	0	0	0	0	0	0	0	0	0	0	0	0	0	0	0	0	0
Bacteria|Actinobacteria|Actinobacteridae|Actinomycetales|Propionibacterineae|Propionibacteriaceae|Propionibacterium|Propionibacterium acnes|Propionibacterium acnes HL005PA2	0	0	0	0	0	0	0	0	0	0	0	0	0	0	0	0	0	0	0	0	0	0
Bacteria|Actinobacteria|Actinobacteridae|Actinomycetales|Propionibacterineae|Propionibacteriaceae|Propionibacterium|Propionibacterium acnes|Propionibacterium acnes HL005PA3	0	0	0	0	0	0	0	0	0	0	0	0	0	0	0	0	0	0	0	0	0	0
Bacteria|Actinobacteria|Actinobacteridae|Actinomycetales|Propionibacterineae|Propionibacteriaceae|Propionibacterium|Propionibacterium acnes|Propionibacterium acnes HL005PA4	0	0	0	0	0	0	0	0	0	0	0	0	0	0	0	0	0	0	0	0	0	0
Bacteria|Actinobacteria|Actinobacteridae|Actinomycetales|Propionibacterineae|Propionibacteriaceae|Propionibacterium|Propionibacterium acnes|Propionibacterium acnes HL007PA1	0	0	0	0	0	0	0	0	0	0	0	0	0	0	0	0	0	0	0	0	0	0
Bacteria|Actinobacteria|Actinobacteridae|Actinomycetales|Propionibacterineae|Propionibacteriaceae|Propionibacterium|Propionibacterium acnes|Propionibacterium acnes HL013PA1	0	0	0	0	0	0	0	0	0	0	0	0	0	0	0	0	0	0	0	0	0	0
Bacteria|Actinobacteria|Actinobacteridae|Actinomycetales|Propionibacterineae|Propionibacteriaceae|Propionibacterium|Propionibacterium acnes|Propionibacterium acnes HL013PA2	0	0	0	0	0	0	0	0	0	0	0	0	0	0	0	0	0	0	0	0	0	0
Bacteria|Actinobacteria|Actinobacteridae|Actinomycetales|Propionibacterineae|Propionibacteriaceae|Propionibacterium|Propionibacterium acnes|Propionibacterium acnes HL020PA1	0	0	0	0	0	0	0	0	0	0	0	0	0	0	0	0	0	0	0	0	0	0
Bacteria|Actinobacteria|Actinobacteridae|Actinomycetales|Propionibacterineae|Propionibacteriaceae|Propionibacterium|Propionibacterium acnes|Propionibacterium acnes HL025PA1	0	0	0	0	0	0	0	0	0	0	0	0	0	0	0	0	0	0	0	0	0	0
Bacteria|Actinobacteria|Actinobacteridae|Actinomycetales|Propionibacterineae|Propionibacteriaceae|Propionibacterium|Propionibacterium acnes|Propionibacterium acnes HL025PA2	0	0	0	0	0	0	0	0	0	0	0	0	0	0	0	0	0	0	0	0	0	0
Bacteria|Actinobacteria|Actinobacteridae|Actinomycetales|Propionibacterineae|Propionibacteriaceae|Propionibacterium|Propionibacterium acnes|Propionibacterium acnes HL027PA1	0	0	0	0	0	0	0	0	0	0	0	0	0	0	0	0	0	0	0	0	0	0
Bacteria|Actinobacteria|Actinobacteridae|Actinomycetales|Propionibacterineae|Propionibacteriaceae|Propionibacterium|Propionibacterium acnes|Propionibacterium acnes HL027PA2	0	0	0	0	0	0	0	0	0	0	0	0	0	0	0	0	0	0	0	0	0	0
Bacteria|Actinobacteria|Actinobacteridae|Actinomycetales|Propionibacterineae|Propionibacteriaceae|Propionibacterium|Propionibacterium acnes|Propionibacterium acnes HL030PA1	0	0	0	0	0	0	0	0	0	0	0	0	0	0	0	0	0	0	0	0	0	0
Bacteria|Actinobacteria|Actinobacteridae|Actinomycetales|Propionibacterineae|Propionibacteriaceae|Propionibacterium|Propionibacterium acnes|Propionibacterium acnes HL030PA2	0	0	0	0	0	0	0	0	0	0	0	0	0	0	0	0	0	0	0	0	0	0
Bacteria|Actinobacteria|Actinobacteridae|Actinomycetales|Propionibacterineae|Propionibacteriaceae|Propionibacterium|Propionibacterium acnes|Propionibacterium acnes HL036PA1	0	0	0	0	0	0	0	0	0	0	0	0	0	0	0	0	0	0	0	0	0	0
Bacteria|Actinobacteria|Actinobacteridae|Actinomycetales|Propionibacterineae|Propionibacteriaceae|Propionibacterium|Propionibacterium acnes|Propionibacterium acnes HL036PA2	0	0	0	0	0	0	0	0	0	0	0	0	0	0	0	0	0	0	0	0	0	0
Bacteria|Actinobacteria|Actinobacteridae|Actinomycetales|Propionibacterineae|Propionibacteriaceae|Propionibacterium|Propionibacterium acnes|Propionibacterium acnes HL036PA3	0	0	0	0	0	0	0	0	0	0	0	0	0	0	0	0	0	0	0	0	0	0
Bacteria|Actinobacteria|Actinobacteridae|Actinomycetales|Propionibacterineae|Propionibacteriaceae|Propionibacterium|Propionibacterium acnes|Propionibacterium acnes HL037PA1	0	0	0	0	0	0	0	0	0	0	0	0	0	0	0	0	0	0	0	0	0	0
Bacteria|Actinobacteria|Actinobacteridae|Actinomycetales|Propionibacterineae|Propionibacteriaceae|Propionibacterium|Propionibacterium acnes|Propionibacterium acnes HL037PA2	0	0	0	0	0	0	0	0	0	0	0	0	0	0	0	0	0	0	0	0	0	0
Bacteria|Actinobacteria|Actinobacteridae|Actinomycetales|Propionibacterineae|Propionibacteriaceae|Propionibacterium|Propionibacterium acnes|Propionibacterium acnes HL037PA3	0	0	0	0	0	0	0	0	0	0	0	0	0	0	0	0	0	0	0	0	0	0
Bacteria|Actinobacteria|Actinobacteridae|Actinomycetales|Propionibacterineae|Propionibacteriaceae|Propionibacterium|Propionibacterium acnes|Propionibacterium acnes HL038PA1	0	0	0	0	0	0	0	0	0	0	0	0	0	0	0	0	0	0	0	0	0	0
Bacteria|Actinobacteria|Actinobacteridae|Actinomycetales|Propionibacterineae|Propionibacteriaceae|Propionibacterium|Propionibacterium acnes|Propionibacterium acnes HL043PA1	0	0	0	0	0	0	0	0	0	0	0	0	0	0	0	0	0	0	0	0	0	0
Bacteria|Actinobacteria|Actinobacteridae|Actinomycetales|Propionibacterineae|Propionibacteriaceae|Propionibacterium|Propionibacterium acnes|Propionibacterium acnes HL043PA2	0	0	0	0	0	0	0	0	0	0	0	0	0	0	0	0	0	0	0	0	0	0
Bacteria|Actinobacteria|Actinobacteridae|Actinomycetales|Propionibacterineae|Propionibacteriaceae|Propionibacterium|Propionibacterium acnes|Propionibacterium acnes HL044PA1	1	2	0	0	0	0	0	0	0	0	0	0	0	0	0	0	0	0	0	0	0	0
Bacteria|Actinobacteria|Actinobacteridae|Actinomycetales|Propionibacterineae|Propionibacteriaceae|Propionibacterium|Propionibacterium acnes|Propionibacterium acnes HL045PA1	0	0	0	0	0	0	0	0	0	0	0	0	0	0	0	0	0	0	0	0	0	0
Bacteria|Actinobacteria|Actinobacteridae|Actinomycetales|Propionibacterineae|Propionibacteriaceae|Propionibacterium|Propionibacterium acnes|Propionibacterium acnes HL046PA1	0	0	0	0	0	0	0	0	0	0	0	0	0	0	0	0	0	0	0	0	0	0
Bacteria|Actinobacteria|Actinobacteridae|Actinomycetales|Propionibacterineae|Propionibacteriaceae|Propionibacterium|Propionibacterium acnes|Propionibacterium acnes HL046PA2	0	0	0	0	0	0	0	0	0	0	0	0	0	0	0	0	0	0	0	0	0	0
Bacteria|Actinobacteria|Actinobacteridae|Actinomycetales|Propionibacterineae|Propionibacteriaceae|Propionibacterium|Propionibacterium acnes|Propionibacterium acnes HL050PA1	0	0	0	0	0	0	0	0	0	0	0	0	0	0	0	0	0	0	0	0	0	0
Bacteria|Actinobacteria|Actinobacteridae|Actinomycetales|Propionibacterineae|Propionibacteriaceae|Propionibacterium|Propionibacterium acnes|Propionibacterium acnes HL050PA2	0	0	0	0	0	0	0	0	0	0	0	0	0	0	0	0	0	0	0	0	0	0
Bacteria|Actinobacteria|Actinobacteridae|Actinomycetales|Propionibacterineae|Propionibacteriaceae|Propionibacterium|Propionibacterium acnes|Propionibacterium acnes HL050PA3	0	0	0	0	0	0	0	0	0	0	0	0	0	0	0	0	0	0	0	0	0	0
Bacteria|Actinobacteria|Actinobacteridae|Actinomycetales|Propionibacterineae|Propionibacteriaceae|Propionibacterium|Propionibacterium acnes|Propionibacterium acnes HL053PA1	0	0	0	0	0	0	0	0	0	0	0	0	0	0	0	0	0	0	0	0	0	0
Bacteria|Actinobacteria|Actinobacteridae|Actinomycetales|Propionibacterineae|Propionibacteriaceae|Propionibacterium|Propionibacterium acnes|Propionibacterium acnes HL053PA2	0	0	0	0	0	0	0	0	0	0	0	0	0	0	0	0	0	0	0	0	0	0
Bacteria|Actinobacteria|Actinobacteridae|Actinomycetales|Propionibacterineae|Propionibacteriaceae|Propionibacterium|Propionibacterium acnes|Propionibacterium acnes HL056PA1	0	0	0	0	0	0	0	0	0	0	0	0	0	0	0	0	0	0	0	0	0	0
Bacteria|Actinobacteria|Actinobacteridae|Actinomycetales|Propionibacterineae|Propionibacteriaceae|Propionibacterium|Propionibacterium acnes|Propionibacterium acnes HL059PA1	0	0	0	0	0	0	0	0	0	0	0	0	0	0	0	0	0	0	0	0	0	0
Bacteria|Actinobacteria|Actinobacteridae|Actinomycetales|Propionibacterineae|Propionibacteriaceae|Propionibacterium|Propionibacterium acnes|Propionibacterium acnes HL059PA2	0	0	0	0	0	0	0	0	0	0	0	0	0	0	0	0	0	0	0	0	0	0
Bacteria|Actinobacteria|Actinobacteridae|Actinomycetales|Propionibacterineae|Propionibacteriaceae|Propionibacterium|Propionibacterium acnes|Propionibacterium acnes HL060PA1	0	0	0	0	0	0	0	0	0	0	0	0	0	0	0	0	0	0	0	0	0	0
Bacteria|Actinobacteria|Actinobacteridae|Actinomycetales|Propionibacterineae|Propionibacteriaceae|Propionibacterium|Propionibacterium acnes|Propionibacterium acnes HL063PA1	0	0	0	0	0	0	0	0	0	0	0	0	0	0	0	0	0	0	0	0	0	0
Bacteria|Actinobacteria|Actinobacteridae|Actinomycetales|Propionibacterineae|Propionibacteriaceae|Propionibacterium|Propionibacterium acnes|Propionibacterium acnes HL063PA2	0	0	0	0	0	0	0	0	0	0	0	0	0	0	0	0	0	0	0	0	0	0
Bacteria|Actinobacteria|Actinobacteridae|Actinomycetales|Propionibacterineae|Propionibacteriaceae|Propionibacterium|Propionibacterium acnes|Propionibacterium acnes HL067PA1	0	0	0	0	0	0	0	0	0	0	0	0	0	0	0	0	0	0	0	0	0	0
Bacteria|Actinobacteria|Actinobacteridae|Actinomycetales|Propionibacterineae|Propionibacteriaceae|Propionibacterium|Propionibacterium acnes|Propionibacterium acnes HL072PA1	0	0	0	0	0	0	0	0	0	0	0	0	0	0	0	0	0	0	0	0	0	0
Bacteria|Actinobacteria|Actinobacteridae|Actinomycetales|Propionibacterineae|Propionibacteriaceae|Propionibacterium|Propionibacterium acnes|Propionibacterium acnes HL072PA2	0	0	0	0	0	0	0	0	0	0	0	0	0	0	0	0	0	0	0	0	0	0
Bacteria|Actinobacteria|Actinobacteridae|Actinomycetales|Propionibacterineae|Propionibacteriaceae|Propionibacterium|Propionibacterium acnes|Propionibacterium acnes HL074PA1	0	0	0	0	0	0	0	0	0	0	0	0	0	0	0	0	0	0	0	0	0	0
Bacteria|Actinobacteria|Actinobacteridae|Actinomycetales|Propionibacterineae|Propionibacteriaceae|Propionibacterium|Propionibacterium acnes|Propionibacterium acnes HL078PA1	0	0	0	0	0	0	0	0	0	0	0	0	0	0	0	0	0	0	0	0	0	0
Bacteria|Actinobacteria|Actinobacteridae|Actinomycetales|Propionibacterineae|Propionibacteriaceae|Propionibacterium|Propionibacterium acnes|Propionibacterium acnes HL082PA1	0	0	0	0	0	0	0	0	0	0	0	0	0	0	0	0	0	0	0	0	0	0
Bacteria|Actinobacteria|Actinobacteridae|Actinomycetales|Propionibacterineae|Propionibacteriaceae|Propionibacterium|Propionibacterium acnes|Propionibacterium acnes HL082PA2	2	0	0	0	0	0	0	0	0	0	0	0	0	0	0	0	0	0	0	0	0	0
Bacteria|Actinobacteria|Actinobacteridae|Actinomycetales|Propionibacterineae|Propionibacteriaceae|Propionibacterium|Propionibacterium acnes|Propionibacterium acnes HL083PA1	0	0	0	0	0	0	0	0	0	0	0	0	0	0	0	0	0	0	0	0	0	0
Bacteria|Actinobacteria|Actinobacteridae|Actinomycetales|Propionibacterineae|Propionibacteriaceae|Propionibacterium|Propionibacterium acnes|Propionibacterium acnes HL083PA2	0	0	0	0	0	0	0	0	0	0	0	0	0	0	0	0	0	0	0	0	0	0
Bacteria|Actinobacteria|Actinobacteridae|Actinomycetales|Propionibacterineae|Propionibacteriaceae|Propionibacterium|Propionibacterium acnes|Propionibacterium acnes HL086PA1	0	0	0	0	0	0	0	0	0	0	0	0	0	0	0	0	0	0	0	0	0	0
Bacteria|Actinobacteria|Actinobacteridae|Actinomycetales|Propionibacterineae|Propionibacteriaceae|Propionibacterium|Propionibacterium acnes|Propionibacterium acnes HL087PA1	0	0	0	0	0	0	0	0	0	0	0	0	0	0	0	0	0	0	0	0	0	0
Bacteria|Actinobacteria|Actinobacteridae|Actinomycetales|Propionibacterineae|Propionibacteriaceae|Propionibacterium|Propionibacterium acnes|Propionibacterium acnes HL087PA2	0	0	0	0	0	0	0	0	0	0	0	0	0	0	0	0	0	0	0	0	0	0
Bacteria|Actinobacteria|Actinobacteridae|Actinomycetales|Propionibacterineae|Propionibacteriaceae|Propionibacterium|Propionibacterium acnes|Propionibacterium acnes HL087PA3	0	0	0	0	0	0	0	0	0	0	0	0	0	0	0	0	0	0	0	0	0	0
Bacteria|Actinobacteria|Actinobacteridae|Actinomycetales|Propionibacterineae|Propionibacteriaceae|Propionibacterium|Propionibacterium acnes|Propionibacterium acnes HL092PA1	0	0	0	0	0	0	0	0	0	0	0	0	0	0	0	0	0	0	0	0	0	0
Bacteria|Actinobacteria|Actinobacteridae|Actinomycetales|Propionibacterineae|Propionibacteriaceae|Propionibacterium|Propionibacterium acnes|Propionibacterium acnes HL096PA2	0	0	0	0	0	0	0	0	0	0	0	0	0	0	0	0	0	0	0	0	0	0
Bacteria|Actinobacteria|Actinobacteridae|Actinomycetales|Propionibacterineae|Propionibacteriaceae|Propionibacterium|Propionibacterium acnes|Propionibacterium acnes HL096PA3	0	0	0	0	0	0	0	0	0	0	0	0	0	0	0	0	0	0	0	0	0	0
Bacteria|Actinobacteria|Actinobacteridae|Actinomycetales|Propionibacterineae|Propionibacteriaceae|Propionibacterium|Propionibacterium acnes|Propionibacterium acnes HL097PA1	0	0	0	0	0	0	0	0	0	0	0	0	0	0	0	0	0	0	0	0	0	0
Bacteria|Actinobacteria|Actinobacteridae|Actinomycetales|Propionibacterineae|Propionibacteriaceae|Propionibacterium|Propionibacterium acnes|Propionibacterium acnes HL099PA1	0	0	0	0	0	0	0	0	0	0	0	0	0	0	0	0	0	0	0	0	0	0
Bacteria|Actinobacteria|Actinobacteridae|Actinomycetales|Propionibacterineae|Propionibacteriaceae|Propionibacterium|Propionibacterium acnes|Propionibacterium acnes HL103PA1	0	0	0	0	0	0	0	0	0	0	0	0	0	0	0	0	0	0	0	0	0	0
Bacteria|Actinobacteria|Actinobacteridae|Actinomycetales|Propionibacterineae|Propionibacteriaceae|Propionibacterium|Propionibacterium acnes|Propionibacterium acnes HL110PA1	0	0	0	0	0	0	0	0	0	0	0	0	0	0	0	0	0	0	0	0	0	0
Bacteria|Actinobacteria|Actinobacteridae|Actinomycetales|Propionibacterineae|Propionibacteriaceae|Propionibacterium|Propionibacterium acnes|Propionibacterium acnes HL110PA2	0	0	0	0	0	0	0	0	0	0	0	0	0	0	0	0	0	0	0	0	0	0
Bacteria|Actinobacteria|Actinobacteridae|Actinomycetales|Propionibacterineae|Propionibacteriaceae|Propionibacterium|Propionibacterium acnes|Propionibacterium acnes HL110PA3	0	0	0	0	0	0	0	0	0	0	0	0	0	0	0	0	0	0	0	0	0	0
Bacteria|Actinobacteria|Actinobacteridae|Actinomycetales|Propionibacterineae|Propionibacteriaceae|Propionibacterium|Propionibacterium acnes|Propionibacterium acnes HL110PA4	0	0	0	0	0	0	0	0	0	0	0	0	0	0	0	0	0	0	0	0	0	0
Bacteria|Actinobacteria|Actinobacteridae|Actinomycetales|Propionibacterineae|Propionibacteriaceae|Propionibacterium|Propionibacterium acnes|Propionibacterium acnes J139	0	0	0	0	0	0	0	0	0	0	0	0	0	0	0	0	0	0	0	0	0	0
Bacteria|Actinobacteria|Actinobacteridae|Actinomycetales|Propionibacterineae|Propionibacteriaceae|Propionibacterium|Propionibacterium acnes|Propionibacterium acnes J165	0	0	0	0	0	0	0	0	0	0	0	0	0	0	0	0	0	0	0	0	0	0
Bacteria|Actinobacteria|Actinobacteridae|Actinomycetales|Propionibacterineae|Propionibacteriaceae|Propionibacterium|Propionibacterium acnes|Propionibacterium acnes KPA171202	0	0	0	0	0	0	0	0	0	0	0	0	0	0	0	0	0	0	0	0	0	0
Bacteria|Actinobacteria|Actinobacteridae|Actinomycetales|Propionibacterineae|Propionibacteriaceae|Propionibacterium|Propionibacterium acnes|Propionibacterium acnes PRP-38	0	0	0	0	0	0	0	0	0	0	0	0	0	0	0	0	0	0	0	0	0	0
Bacteria|Actinobacteria|Actinobacteridae|Actinomycetales|Propionibacterineae|Propionibacteriaceae|Propionibacterium|Propionibacterium acnes|Propionibacterium acnes SK137	0	0	0	0	0	0	0	0	0	0	0	0	0	0	0	0	0	0	0	0	0	0
Bacteria|Actinobacteria|Actinobacteridae|Actinomycetales|Propionibacterineae|Propionibacteriaceae|Propionibacterium|Propionibacterium acnes|Propionibacterium acnes SK182	0	0	0	0	0	0	0	0	0	0	0	0	0	0	0	0	0	0	0	0	0	0
Bacteria|Actinobacteria|Actinobacteridae|Actinomycetales|Propionibacterineae|Propionibacteriaceae|Propionibacterium|Propionibacterium acnes|Propionibacterium acnes SK182B-JCVI	2	1	0	1	0	0	0	0	0	0	0	0	0	0	0	0	1	0	0	0	0	0
Bacteria|Actinobacteria|Actinobacteridae|Actinomycetales|Propionibacterineae|Propionibacteriaceae|Propionibacterium|Propionibacterium acnes|Propionibacterium acnes SK187	0	0	0	0	0	0	0	0	0	0	0	0	0	0	0	0	0	0	0	0	0	0
Bacteria|Actinobacteria|Actinobacteridae|Actinomycetales|Propionibacterineae|Propionibacteriaceae|Propionibacterium|Propionibacterium acnes|Propionibacterium acnes TypeIA2 P.acn17	0	0	0	0	0	0	0	0	0	0	0	0	0	0	0	0	0	0	0	0	0	0
Bacteria|Actinobacteria|Actinobacteridae|Actinomycetales|Propionibacterineae|Propionibacteriaceae|Propionibacterium|Propionibacterium acnes|Propionibacterium acnes TypeIA2 P.acn31	0	0	0	0	0	0	0	0	0	0	0	0	0	0	0	0	0	0	0	0	0	0
Bacteria|Actinobacteria|Actinobacteridae|Actinomycetales|Propionibacterineae|Propionibacteriaceae|Propionibacterium|Propionibacterium acnes|Propionibacterium acnes TypeIA2 P.acn33	0	0	0	0	0	0	0	0	0	0	0	0	0	0	0	0	0	0	0	0	0	0
Bacteria|Actinobacteria|Actinobacteridae|Actinomycetales|Propionibacterineae|Propionibacteriaceae|Propionibacterium|Propionibacterium avidum|Propionibacterium avidum ATCC 25577	0	0	0	0	0	0	0	1	0	0	0	0	0	0	0	0	0	0	0	0	0	0
Bacteria|Actinobacteria|Actinobacteridae|Actinomycetales|Propionibacterineae|Propionibacteriaceae|Propionibacterium|Propionibacterium freudenreichii|Propionibacterium freudenreichii subsp. shermanii|Propionibacterium freudenreichii subsp. shermanii CIRM-BIA1	3	1	2	0	1	0	0	2	0	0	0	0	0	1	0	0	5	0	0	0	0	0
Bacteria|Actinobacteria|Actinobacteridae|Actinomycetales|Propionibacterineae|Propionibacteriaceae|Propionibacterium|Propionibacterium humerusii|Propionibacterium humerusii P08	0	0	0	0	0	0	0	0	0	0	0	0	0	0	0	0	0	0	0	0	0	0
Bacteria|Actinobacteria|Actinobacteridae|Actinomycetales|Propionibacterineae|Propionibacteriaceae|Propionibacterium|Propionibacterium propionicum|Propionibacterium propionicum F0230a	0	0	0	0	0	0	0	7	0	0	0	0	0	0	0	0	2	0	0	0	0	0
Bacteria|Actinobacteria|Actinobacteridae|Actinomycetales|Propionibacterineae|Propionibacteriaceae|Propionibacterium|Propionibacterium sp. 409-HC1	0	0	0	0	0	0	0	0	0	0	0	0	0	0	0	0	0	0	0	0	0	0
Bacteria|Actinobacteria|Actinobacteridae|Actinomycetales|Propionibacterineae|Propionibacteriaceae|Propionibacterium|Propionibacterium sp. 434-HC2	0	0	0	0	0	0	0	0	0	0	0	0	0	0	0	0	0	0	0	0	0	0
Bacteria|Actinobacteria|Actinobacteridae|Actinomycetales|Propionibacterineae|Propionibacteriaceae|Propionibacterium|Propionibacterium sp. 5_U_42AFAA	0	0	0	0	0	0	0	0	0	0	0	0	0	0	0	0	0	0	0	0	0	0
Bacteria|Actinobacteria|Actinobacteridae|Actinomycetales|Propionibacterineae|Propionibacteriaceae|Propionibacterium|Propionibacterium sp. CC003-HC2	0	0	0	0	0	0	0	0	0	0	0	0	0	0	0	0	0	0	0	0	0	0
Bacteria|Actinobacteria|Actinobacteridae|Actinomycetales|Pseudonocardineae|Pseudonocardiaceae|Actinosynnema|Actinosynnema mirum|Actinosynnema mirum DSM 43827	0	0	0	0	0	0	0	0	0	0	3	0	0	1	0	0	0	1	0	0	0	0
Bacteria|Actinobacteria|Actinobacteridae|Actinomycetales|Pseudonocardineae|Pseudonocardiaceae|Amycolatopsis|Amycolatopsis mediterranei|Amycolatopsis mediterranei S699	0	0	0	0	0	0	0	0	0	0	0	0	0	0	0	0	0	0	0	0	0	0
Bacteria|Actinobacteria|Actinobacteridae|Actinomycetales|Pseudonocardineae|Pseudonocardiaceae|Amycolatopsis|Amycolatopsis mediterranei|Amycolatopsis mediterranei U32	0	0	0	0	0	0	0	0	0	0	0	0	0	0	0	0	0	0	0	0	0	0
Bacteria|Actinobacteria|Actinobacteridae|Actinomycetales|Pseudonocardineae|Pseudonocardiaceae|Amycolatopsis|Amycolatopsis sp. ATCC 39116	0	0	0	0	0	0	0	0	0	0	0	0	0	0	0	0	0	0	0	0	0	0
Bacteria|Actinobacteria|Actinobacteridae|Actinomycetales|Pseudonocardineae|Pseudonocardiaceae|Pseudonocardia|Pseudonocardia dioxanivorans|Pseudonocardia dioxanivorans CB1190	0	0	0	0	0	0	0	0	0	0	0	0	0	0	0	0	0	0	0	0	0	0
Bacteria|Actinobacteria|Actinobacteridae|Actinomycetales|Pseudonocardineae|Pseudonocardiaceae|Pseudonocardia|Pseudonocardia sp. P1	0	0	0	0	0	0	0	0	0	0	0	0	0	0	0	0	0	0	0	0	0	0
Bacteria|Actinobacteria|Actinobacteridae|Actinomycetales|Pseudonocardineae|Pseudonocardiaceae|Saccharomonospora|Saccharomonospora azurea|Saccharomonospora azurea NA-128	0	0	0	1	1	0	0	0	0	0	0	0	0	0	0	0	0	0	0	0	0	0
Bacteria|Actinobacteria|Actinobacteridae|Actinomycetales|Pseudonocardineae|Pseudonocardiaceae|Saccharomonospora|Saccharomonospora cyanea|Saccharomonospora cyanea NA-134	0	0	0	0	0	0	0	0	0	0	0	0	0	0	0	0	0	0	0	0	0	0
Bacteria|Actinobacteria|Actinobacteridae|Actinomycetales|Pseudonocardineae|Pseudonocardiaceae|Saccharomonospora|Saccharomonospora glauca|Saccharomonospora glauca K62	0	0	0	0	1	0	0	2	0	0	0	0	0	0	0	0	0	0	0	0	0	0
Bacteria|Actinobacteria|Actinobacteridae|Actinomycetales|Pseudonocardineae|Pseudonocardiaceae|Saccharomonospora|Saccharomonospora marina|Saccharomonospora marina XMU15	0	0	1	0	0	0	0	0	0	0	0	0	0	0	0	0	0	0	0	0	0	0
Bacteria|Actinobacteria|Actinobacteridae|Actinomycetales|Pseudonocardineae|Pseudonocardiaceae|Saccharomonospora|Saccharomonospora paurometabolica|Saccharomonospora paurometabolica YIM 90007	0	0	0	0	0	0	0	0	0	0	0	0	0	0	0	0	0	0	0	0	0	0
Bacteria|Actinobacteria|Actinobacteridae|Actinomycetales|Pseudonocardineae|Pseudonocardiaceae|Saccharomonospora|Saccharomonospora viridis|Saccharomonospora viridis DSM 43017	0	1	1	0	0	1	0	0	0	0	0	0	0	1	0	0	2	2	0	0	0	0
Bacteria|Actinobacteria|Actinobacteridae|Actinomycetales|Pseudonocardineae|Pseudonocardiaceae|Saccharomonospora|Saccharomonospora xinjiangensis|Saccharomonospora xinjiangensis XJ-54	1	1	0	0	0	0	0	0	0	0	0	0	0	0	0	0	0	0	0	0	0	0
Bacteria|Actinobacteria|Actinobacteridae|Actinomycetales|Pseudonocardineae|Pseudonocardiaceae|Saccharopolyspora|Saccharopolyspora erythraea|Saccharopolyspora erythraea NRRL 2338	0	0	0	0	0	0	0	0	0	0	0	0	0	0	0	0	0	0	0	0	0	0
Bacteria|Actinobacteria|Actinobacteridae|Actinomycetales|Pseudonocardineae|Pseudonocardiaceae|Saccharopolyspora|Saccharopolyspora spinosa|Saccharopolyspora spinosa NRRL 18395	0	0	0	0	0	0	0	0	0	0	0	0	0	0	0	0	0	0	0	0	0	0
Bacteria|Actinobacteria|Actinobacteridae|Actinomycetales|Pseudonocardineae|Pseudonocardiaceae|Thermobispora|Thermobispora bispora|Thermobispora bispora DSM 43833	0	0	0	0	0	0	0	0	0	0	0	0	0	0	0	0	0	0	0	0	0	0
Bacteria|Actinobacteria|Actinobacteridae|Actinomycetales|Streptomycineae|Streptomycetaceae|Kitasatospora|Kitasatospora setae|Kitasatospora setae KM-6054	0	0	0	0	0	0	0	0	0	0	0	0	0	0	0	0	0	0	0	0	0	0
Bacteria|Actinobacteria|Actinobacteridae|Actinomycetales|Streptomycineae|Streptomycetaceae|Streptomyces|Streptomyces albidoflavus group|Streptomyces coelicolor|Streptomyces coelicolor A3(2)	0	0	0	0	0	0	0	0	0	0	0	0	0	0	0	0	0	0	0	0	0	0
Bacteria|Actinobacteria|Actinobacteridae|Actinomycetales|Streptomycineae|Streptomycetaceae|Streptomyces|Streptomyces albus|Streptomyces albus J1074	0	0	0	0	1	0	0	0	0	0	0	0	0	0	0	0	0	0	0	0	0	0
Bacteria|Actinobacteria|Actinobacteridae|Actinomycetales|Streptomycineae|Streptomycetaceae|Streptomyces|Streptomyces avermitilis|Streptomyces avermitilis MA-4680 = NBRC 14893	0	0	0	0	0	0	0	0	0	0	0	0	0	0	0	0	0	0	0	0	0	0
Bacteria|Actinobacteria|Actinobacteridae|Actinomycetales|Streptomycineae|Streptomycetaceae|Streptomyces|Streptomyces bingchenggensis|Streptomyces bingchenggensis BCW-1	0	0	0	0	0	0	0	0	1	0	0	0	0	0	0	0	0	0	0	0	0	0
Bacteria|Actinobacteria|Actinobacteridae|Actinomycetales|Streptomycineae|Streptomycetaceae|Streptomyces|Streptomyces cattleya|Streptomyces cattleya NRRL 8057 = DSM 46488	0	0	0	0	0	0	0	0	0	0	0	0	0	0	0	0	0	0	0	0	0	0
Bacteria|Actinobacteria|Actinobacteridae|Actinomycetales|Streptomycineae|Streptomycetaceae|Streptomyces|Streptomyces chartreusis|Streptomyces chartreusis NRRL 12338	0	0	0	0	0	0	0	0	0	0	0	0	0	0	0	0	0	0	0	0	0	0
Bacteria|Actinobacteria|Actinobacteridae|Actinomycetales|Streptomycineae|Streptomycetaceae|Streptomyces|Streptomyces clavuligerus|Streptomyces clavuligerus ATCC 27064	0	0	0	0	0	0	0	0	0	0	0	0	0	0	0	0	0	0	0	0	0	0
Bacteria|Actinobacteria|Actinobacteridae|Actinomycetales|Streptomycineae|Streptomycetaceae|Streptomyces|Streptomyces filamentosus|Streptomyces roseosporus NRRL 11379	0	0	0	0	0	0	0	0	0	0	0	0	0	0	0	0	0	0	0	0	0	0
Bacteria|Actinobacteria|Actinobacteridae|Actinomycetales|Streptomycineae|Streptomycetaceae|Streptomyces|Streptomyces filamentosus|Streptomyces roseosporus NRRL 15998	0	0	0	0	0	0	0	0	0	0	0	0	0	0	0	0	0	0	0	0	0	0
Bacteria|Actinobacteria|Actinobacteridae|Actinomycetales|Streptomycineae|Streptomycetaceae|Streptomyces|Streptomyces ghanaensis|Streptomyces ghanaensis ATCC 14672	0	0	0	0	0	0	0	0	0	0	0	0	0	0	0	0	0	0	0	0	0	0
Bacteria|Actinobacteria|Actinobacteridae|Actinomycetales|Streptomycineae|Streptomycetaceae|Streptomyces|Streptomyces griseoaurantiacus|Streptomyces griseoaurantiacus M045	0	0	0	0	0	0	0	0	0	0	0	0	0	0	0	0	0	0	0	0	0	0
Bacteria|Actinobacteria|Actinobacteridae|Actinomycetales|Streptomycineae|Streptomycetaceae|Streptomyces|Streptomyces griseoflavus|Streptomyces griseoflavus Tu4000	0	0	0	0	0	0	0	0	0	0	0	0	0	0	0	0	0	0	0	0	0	0
Bacteria|Actinobacteria|Actinobacteridae|Actinomycetales|Streptomycineae|Streptomycetaceae|Streptomyces|Streptomyces griseus group|Streptomyces griseus subgroup|Streptomyces griseus|Streptomyces griseus subsp. griseus|Streptomyces griseus subsp. griseus NBRC 13350	0	0	0	0	0	0	0	0	0	0	0	0	0	0	0	0	0	0	0	0	0	0
Bacteria|Actinobacteria|Actinobacteridae|Actinomycetales|Streptomycineae|Streptomycetaceae|Streptomyces|Streptomyces griseus group|Streptomyces griseus subgroup|Streptomyces griseus|Streptomyces griseus XylebKG-1	0	0	0	0	0	0	0	0	0	0	0	0	0	0	0	0	0	0	0	0	0	0
Bacteria|Actinobacteria|Actinobacteridae|Actinomycetales|Streptomycineae|Streptomycetaceae|Streptomyces|Streptomyces himastatinicus|Streptomyces himastatinicus ATCC 53653	0	0	0	0	0	0	0	0	0	0	0	0	0	0	0	0	0	0	0	0	0	0
Bacteria|Actinobacteria|Actinobacteridae|Actinomycetales|Streptomycineae|Streptomycetaceae|Streptomyces|Streptomyces hygroscopicus|Streptomyces hygroscopicus subsp. jinggangensis|Streptomyces hygroscopicus subsp. jinggangensis 5008	0	0	0	0	0	0	0	0	0	0	0	0	0	0	0	0	0	0	0	0	0	0
Bacteria|Actinobacteria|Actinobacteridae|Actinomycetales|Streptomycineae|Streptomycetaceae|Streptomyces|Streptomyces lividans|Streptomyces lividans TK24	0	0	0	0	0	0	0	0	0	0	0	0	0	0	0	0	0	0	0	0	0	0
Bacteria|Actinobacteria|Actinobacteridae|Actinomycetales|Streptomycineae|Streptomycetaceae|Streptomyces|Streptomyces pratensis|Streptomyces pratensis ATCC 33331	0	0	0	0	0	0	0	0	0	0	0	0	0	0	0	0	0	0	0	0	0	0
Bacteria|Actinobacteria|Actinobacteridae|Actinomycetales|Streptomycineae|Streptomycetaceae|Streptomyces|Streptomyces pristinaespiralis|Streptomyces pristinaespiralis ATCC 25486	0	0	0	0	0	0	0	0	0	0	0	0	0	0	0	0	0	0	0	0	0	0
Bacteria|Actinobacteria|Actinobacteridae|Actinomycetales|Streptomycineae|Streptomycetaceae|Streptomyces|Streptomyces scabiei|Streptomyces scabiei 87.22	0	0	0	0	0	0	0	0	0	0	0	0	0	0	0	0	0	1	0	0	0	0
Bacteria|Actinobacteria|Actinobacteridae|Actinomycetales|Streptomycineae|Streptomycetaceae|Streptomyces|Streptomyces somaliensis|Streptomyces somaliensis DSM 40738	0	0	0	0	0	0	0	0	0	0	0	0	0	0	0	0	0	0	0	0	0	0
Bacteria|Actinobacteria|Actinobacteridae|Actinomycetales|Streptomycineae|Streptomycetaceae|Streptomyces|Streptomyces sp. AA4	0	0	0	0	0	0	0	0	0	0	0	0	0	0	0	0	0	0	0	0	0	0
Bacteria|Actinobacteria|Actinobacteridae|Actinomycetales|Streptomycineae|Streptomycetaceae|Streptomyces|Streptomyces sp. C	0	0	0	0	0	0	0	0	0	0	0	0	0	0	0	0	0	0	0	0	0	0
Bacteria|Actinobacteria|Actinobacteridae|Actinomycetales|Streptomycineae|Streptomycetaceae|Streptomyces|Streptomyces sp. e14	0	0	0	0	0	0	0	0	0	0	0	0	0	0	0	0	0	0	0	0	0	0
Bacteria|Actinobacteria|Actinobacteridae|Actinomycetales|Streptomycineae|Streptomycetaceae|Streptomyces|Streptomyces sp. Mg1	0	0	0	0	0	0	0	0	0	0	0	0	0	0	0	0	0	0	0	0	0	0
Bacteria|Actinobacteria|Actinobacteridae|Actinomycetales|Streptomycineae|Streptomycetaceae|Streptomyces|Streptomyces sp. S4	0	0	0	0	0	0	0	0	0	0	0	0	0	0	0	0	0	0	0	0	0	0
Bacteria|Actinobacteria|Actinobacteridae|Actinomycetales|Streptomycineae|Streptomycetaceae|Streptomyces|Streptomyces sp. SA3_actF	0	0	0	0	0	0	0	0	0	0	0	0	0	0	0	0	0	0	0	0	0	0
Bacteria|Actinobacteria|Actinobacteridae|Actinomycetales|Streptomycineae|Streptomycetaceae|Streptomyces|Streptomyces sp. SA3_actG	0	0	0	0	0	0	0	0	0	0	0	0	0	0	0	0	0	0	0	0	0	0
Bacteria|Actinobacteria|Actinobacteridae|Actinomycetales|Streptomycineae|Streptomycetaceae|Streptomyces|Streptomyces sp. SirexAA-E	0	0	0	0	0	0	0	0	0	0	0	0	0	0	0	0	0	0	0	0	0	0
Bacteria|Actinobacteria|Actinobacteridae|Actinomycetales|Streptomycineae|Streptomycetaceae|Streptomyces|Streptomyces sp. SPB74	0	0	0	0	0	0	0	0	0	0	0	0	0	0	0	0	0	0	0	0	0	0
Bacteria|Actinobacteria|Actinobacteridae|Actinomycetales|Streptomycineae|Streptomycetaceae|Streptomyces|Streptomyces sp. SPB78	0	0	0	0	0	0	0	0	0	0	0	0	0	0	0	0	0	0	0	0	0	0
Bacteria|Actinobacteria|Actinobacteridae|Actinomycetales|Streptomycineae|Streptomycetaceae|Streptomyces|Streptomyces sp. Tu6071	0	0	0	0	0	0	0	0	0	0	0	0	0	0	0	0	0	0	0	0	0	0
Bacteria|Actinobacteria|Actinobacteridae|Actinomycetales|Streptomycineae|Streptomycetaceae|Streptomyces|Streptomyces sp. W007	0	0	0	0	0	0	0	0	0	0	0	0	0	0	0	0	0	0	0	0	0	0
Bacteria|Actinobacteria|Actinobacteridae|Actinomycetales|Streptomycineae|Streptomycetaceae|Streptomyces|Streptomyces sviceus|Streptomyces sviceus ATCC 29083	0	0	0	0	0	0	0	0	0	0	0	0	0	0	0	0	0	0	0	0	0	0
Bacteria|Actinobacteria|Actinobacteridae|Actinomycetales|Streptomycineae|Streptomycetaceae|Streptomyces|Streptomyces tsukubaensis|Streptomyces tsukubaensis NRRL18488	0	0	0	0	0	0	0	0	0	0	0	0	0	0	0	0	0	0	0	0	0	0
Bacteria|Actinobacteria|Actinobacteridae|Actinomycetales|Streptomycineae|Streptomycetaceae|Streptomyces|Streptomyces violaceusniger|Streptomyces violaceusniger Tu 4113	0	0	0	0	0	0	0	0	0	0	0	0	0	0	0	0	0	0	0	0	0	0
Bacteria|Actinobacteria|Actinobacteridae|Actinomycetales|Streptomycineae|Streptomycetaceae|Streptomyces|Streptomyces viridochromogenes|Streptomyces viridochromogenes DSM 40736	0	0	0	0	0	0	0	0	0	0	0	0	0	0	0	0	0	0	0	0	0	0
Bacteria|Actinobacteria|Actinobacteridae|Actinomycetales|Streptomycineae|Streptomycetaceae|Streptomyces|Streptomyces zinciresistens|Streptomyces zinciresistens K42	0	0	0	0	0	0	0	0	1	0	0	0	0	0	0	0	0	0	0	0	0	0
Bacteria|Actinobacteria|Actinobacteridae|Actinomycetales|Streptosporangineae|Nocardiopsaceae|Nocardiopsis|Nocardiopsis alba|Nocardiopsis alba ATCC BAA-2165	1	2	3	4	2	0	1	0	0	0	1	0	0	3	0	0	3	1	0	0	0	0
Bacteria|Actinobacteria|Actinobacteridae|Actinomycetales|Streptosporangineae|Nocardiopsaceae|Nocardiopsis|Nocardiopsis dassonvillei|Nocardiopsis dassonvillei subsp. dassonvillei|Nocardiopsis dassonvillei subsp. dassonvillei DSM 43111	0	0	0	0	0	0	0	0	0	0	0	0	0	0	0	0	0	0	0	0	0	0
Bacteria|Actinobacteria|Actinobacteridae|Actinomycetales|Streptosporangineae|Nocardiopsaceae|Thermobifida|Thermobifida fusca|Thermobifida fusca YX	0	1	1	1	4	1	0	0	0	0	0	0	0	0	0	0	1	0	0	0	0	0
Bacteria|Actinobacteria|Actinobacteridae|Actinomycetales|Streptosporangineae|Streptosporangiaceae|Streptosporangium|Streptosporangium roseum|Streptosporangium roseum DSM 43021	0	0	0	0	0	0	0	0	0	0	0	0	0	0	0	0	0	0	0	0	0	0
Bacteria|Actinobacteria|Actinobacteridae|Actinomycetales|Streptosporangineae|Thermomonosporaceae|Thermomonospora|Thermomonospora curvata|Thermomonospora curvata DSM 43183	0	0	0	0	0	0	0	0	0	0	0	0	0	0	0	0	0	0	0	0	0	0
Bacteria|Actinobacteria|Actinobacteridae|Bifidobacteriales|Bifidobacteriaceae|Bifidobacterium|Bifidobacterium adolescentis|Bifidobacterium adolescentis ATCC 15703	165	65	82	33	12	1	1	473	0	0	1	0	0	13	2	0	117	0	2	1	0	0
Bacteria|Actinobacteria|Actinobacteridae|Bifidobacteriales|Bifidobacteriaceae|Bifidobacterium|Bifidobacterium adolescentis|Bifidobacterium adolescentis L2-32	184	137	134	35	44	0	1	542	0	3	18	1	0	19	4	0	150	3	4	1	0	1
Bacteria|Actinobacteria|Actinobacteridae|Bifidobacteriales|Bifidobacteriaceae|Bifidobacterium|Bifidobacterium angulatum|Bifidobacterium angulatum DSM 20098 = JCM 7096	0	0	0	0	0	0	0	0	0	0	0	0	0	0	0	0	0	0	0	0	0	0
Bacteria|Actinobacteria|Actinobacteridae|Bifidobacteriales|Bifidobacteriaceae|Bifidobacterium|Bifidobacterium angulatum|Bifidobacterium angulatum DSM 20098 = JCM 7096	0	0	0	0	0	0	0	0	0	0	0	0	0	0	0	0	0	0	0	0	0	0
Bacteria|Actinobacteria|Actinobacteridae|Bifidobacteriales|Bifidobacteriaceae|Bifidobacterium|Bifidobacterium animalis|Bifidobacterium animalis subsp. animalis|Bifidobacterium animalis subsp. animalis ATCC 25527	0	0	0	0	0	0	0	0	0	0	0	0	0	0	0	0	0	0	0	0	0	0
Bacteria|Actinobacteria|Actinobacteridae|Bifidobacteriales|Bifidobacteriaceae|Bifidobacterium|Bifidobacterium animalis|Bifidobacterium animalis subsp. lactis|Bifidobacterium animalis subsp. lactis AD011	0	0	0	0	0	0	0	0	0	0	0	0	0	0	0	0	0	0	0	0	0	0
Bacteria|Actinobacteria|Actinobacteridae|Bifidobacteriales|Bifidobacteriaceae|Bifidobacterium|Bifidobacterium animalis|Bifidobacterium animalis subsp. lactis|Bifidobacterium animalis subsp. lactis B420	0	0	0	0	0	0	0	0	0	0	0	0	0	0	0	0	0	0	0	0	0	0
Bacteria|Actinobacteria|Actinobacteridae|Bifidobacteriales|Bifidobacteriaceae|Bifidobacterium|Bifidobacterium animalis|Bifidobacterium animalis subsp. lactis|Bifidobacterium animalis subsp. lactis BB-12	0	0	0	0	0	0	0	0	0	0	0	0	0	0	0	0	0	0	0	0	0	0
Bacteria|Actinobacteria|Actinobacteridae|Bifidobacteriales|Bifidobacteriaceae|Bifidobacterium|Bifidobacterium animalis|Bifidobacterium animalis subsp. lactis|Bifidobacterium animalis subsp. lactis Bi-07	0	0	0	0	0	0	0	0	0	0	0	0	0	0	0	0	0	0	0	0	0	0
Bacteria|Actinobacteria|Actinobacteridae|Bifidobacteriales|Bifidobacteriaceae|Bifidobacterium|Bifidobacterium animalis|Bifidobacterium animalis subsp. lactis|Bifidobacterium animalis subsp. lactis Bl-04	0	0	0	0	0	0	0	0	0	0	0	0	0	0	0	0	0	0	0	0	0	0
Bacteria|Actinobacteria|Actinobacteridae|Bifidobacteriales|Bifidobacteriaceae|Bifidobacterium|Bifidobacterium animalis|Bifidobacterium animalis subsp. lactis|Bifidobacterium animalis subsp. lactis BLC1	0	0	0	0	0	0	0	0	0	0	0	0	0	0	0	0	0	0	0	0	0	0
Bacteria|Actinobacteria|Actinobacteridae|Bifidobacteriales|Bifidobacteriaceae|Bifidobacterium|Bifidobacterium animalis|Bifidobacterium animalis subsp. lactis|Bifidobacterium animalis subsp. lactis BS 01	0	0	0	0	0	0	0	0	0	0	0	0	0	0	0	0	0	0	0	0	0	0
Bacteria|Actinobacteria|Actinobacteridae|Bifidobacteriales|Bifidobacteriaceae|Bifidobacterium|Bifidobacterium animalis|Bifidobacterium animalis subsp. lactis|Bifidobacterium animalis subsp. lactis CNCM I-2494	0	0	0	0	0	0	0	0	0	0	0	0	0	0	0	0	0	0	0	0	0	0
Bacteria|Actinobacteria|Actinobacteridae|Bifidobacteriales|Bifidobacteriaceae|Bifidobacterium|Bifidobacterium animalis|Bifidobacterium animalis subsp. lactis|Bifidobacterium animalis subsp. lactis DSM 10140	0	0	0	0	0	0	0	0	0	0	0	0	0	0	0	0	0	0	0	0	0	0
Bacteria|Actinobacteria|Actinobacteridae|Bifidobacteriales|Bifidobacteriaceae|Bifidobacterium|Bifidobacterium animalis|Bifidobacterium animalis subsp. lactis|Bifidobacterium animalis subsp. lactis HN019	0	0	0	0	0	0	0	0	0	0	0	0	0	0	0	0	0	0	0	0	0	0
Bacteria|Actinobacteria|Actinobacteridae|Bifidobacteriales|Bifidobacteriaceae|Bifidobacterium|Bifidobacterium animalis|Bifidobacterium animalis subsp. lactis|Bifidobacterium animalis subsp. lactis V9	0	0	0	0	0	0	0	0	0	0	0	0	0	0	0	0	0	0	0	0	0	0
Bacteria|Actinobacteria|Actinobacteridae|Bifidobacteriales|Bifidobacteriaceae|Bifidobacterium|Bifidobacterium bifidum|Bifidobacterium bifidum BGN4	5	0	1	1	3	0	0	19	0	0	1	0	0	0	0	0	2	0	0	0	0	0
Bacteria|Actinobacteria|Actinobacteridae|Bifidobacteriales|Bifidobacteriaceae|Bifidobacterium|Bifidobacterium bifidum|Bifidobacterium bifidum NCIMB 41171	63	37	34	8	14	0	0	140	0	0	8	0	0	4	0	0	33	0	0	0	0	0
Bacteria|Actinobacteria|Actinobacteridae|Bifidobacteriales|Bifidobacteriaceae|Bifidobacterium|Bifidobacterium bifidum|Bifidobacterium bifidum PRL2010	2	1	3	2	0	0	0	7	0	0	0	0	0	0	0	0	2	0	0	0	0	0
Bacteria|Actinobacteria|Actinobacteridae|Bifidobacteriales|Bifidobacteriaceae|Bifidobacterium|Bifidobacterium bifidum|Bifidobacterium bifidum S17	1	1	1	0	1	0	0	9	0	0	0	0	0	1	0	0	1	0	0	0	0	0
Bacteria|Actinobacteria|Actinobacteridae|Bifidobacteriales|Bifidobacteriaceae|Bifidobacterium|Bifidobacterium breve|Bifidobacterium breve ACS-071-V-Sch8b	2	4	2	1	0	1	0	13	0	0	0	0	0	0	0	0	6	0	0	0	0	0
Bacteria|Actinobacteria|Actinobacteridae|Bifidobacteriales|Bifidobacteriaceae|Bifidobacterium|Bifidobacterium breve|Bifidobacterium breve CECT 7263	11	11	17	7	12	0	0	58	0	1	1	0	0	6	0	0	11	0	0	0	0	0
Bacteria|Actinobacteria|Actinobacteridae|Bifidobacteriales|Bifidobacteriaceae|Bifidobacterium|Bifidobacterium breve|Bifidobacterium breve DPC 6330	16	6	10	6	6	0	0	41	0	0	1	0	0	1	0	0	11	0	0	0	0	0
Bacteria|Actinobacteria|Actinobacteridae|Bifidobacteriales|Bifidobacteriaceae|Bifidobacterium|Bifidobacterium breve|Bifidobacterium breve DSM 20213 = JCM 1192	0	0	0	0	0	0	0	0	0	0	0	0	0	0	0	0	0	0	0	0	0	0
Bacteria|Actinobacteria|Actinobacteridae|Bifidobacteriales|Bifidobacteriaceae|Bifidobacterium|Bifidobacterium breve|Bifidobacterium breve DSM 20213 = JCM 1192	0	0	0	0	0	0	0	0	0	0	0	0	0	0	0	0	0	0	0	0	0	0
Bacteria|Actinobacteria|Actinobacteridae|Bifidobacteriales|Bifidobacteriaceae|Bifidobacterium|Bifidobacterium breve|Bifidobacterium breve UCC2003	11	1	5	3	1	0	0	13	0	0	0	0	0	0	0	0	2	0	0	0	0	0
Bacteria|Actinobacteria|Actinobacteridae|Bifidobacteriales|Bifidobacteriaceae|Bifidobacterium|Bifidobacterium catenulatum|Bifidobacterium catenulatum DSM 16992 = JCM 1194 = LMG 11043	157	93	86	35	35	2	0	508	0	1	8	2	2	13	0	0	86	0	2	0	0	1
Bacteria|Actinobacteria|Actinobacteridae|Bifidobacteriales|Bifidobacteriaceae|Bifidobacterium|Bifidobacterium dentium|Bifidobacterium dentium ATCC 27678	0	0	0	0	0	0	0	0	0	0	0	0	0	0	0	0	0	0	0	0	0	0
Bacteria|Actinobacteria|Actinobacteridae|Bifidobacteriales|Bifidobacteriaceae|Bifidobacterium|Bifidobacterium dentium|Bifidobacterium dentium ATCC 27679	0	0	0	0	0	0	0	0	0	0	0	0	0	0	0	0	0	0	0	0	0	0
Bacteria|Actinobacteria|Actinobacteridae|Bifidobacteriales|Bifidobacteriaceae|Bifidobacterium|Bifidobacterium dentium|Bifidobacterium dentium Bd1	0	0	0	0	0	0	0	0	0	0	0	0	0	0	0	0	0	0	0	0	0	0
Bacteria|Actinobacteria|Actinobacteridae|Bifidobacteriales|Bifidobacteriaceae|Bifidobacterium|Bifidobacterium dentium|Bifidobacterium dentium JCVIHMP022	0	0	0	0	0	0	0	0	0	0	0	0	0	0	0	0	0	0	0	0	0	0
Bacteria|Actinobacteria|Actinobacteridae|Bifidobacteriales|Bifidobacteriaceae|Bifidobacterium|Bifidobacterium gallicum|Bifidobacterium gallicum DSM 20093 = LMG 11596	0	0	0	0	0	0	0	0	0	0	0	0	0	0	0	0	0	0	0	0	0	0
Bacteria|Actinobacteria|Actinobacteridae|Bifidobacteriales|Bifidobacteriaceae|Bifidobacterium|Bifidobacterium longum|Bifidobacterium longum DJO10A	15	5	3	3	0	0	0	41	0	0	0	0	0	3	0	0	10	0	0	0	0	0
Bacteria|Actinobacteria|Actinobacteridae|Bifidobacteriales|Bifidobacteriaceae|Bifidobacterium|Bifidobacterium longum|Bifidobacterium longum NCC2705	4	3	5	0	1	0	0	14	0	0	0	0	0	0	0	0	5	0	0	0	0	0
Bacteria|Actinobacteria|Actinobacteridae|Bifidobacteriales|Bifidobacteriaceae|Bifidobacterium|Bifidobacterium longum|Bifidobacterium longum subsp. infantis|Bifidobacterium longum subsp. infantis 157F	8	5	5	0	1	0	0	20	0	0	0	0	0	1	0	0	6	0	0	0	0	0
Bacteria|Actinobacteria|Actinobacteridae|Bifidobacteriales|Bifidobacteriaceae|Bifidobacterium|Bifidobacterium longum|Bifidobacterium longum subsp. infantis|Bifidobacterium longum subsp. infantis ATCC 15697 = JCM 1222 = DSM 20088	0	0	0	0	0	0	0	0	0	0	0	0	0	0	0	0	0	0	0	0	0	0
Bacteria|Actinobacteria|Actinobacteridae|Bifidobacteriales|Bifidobacteriaceae|Bifidobacterium|Bifidobacterium longum|Bifidobacterium longum subsp. infantis|Bifidobacterium longum subsp. infantis CCUG 52486	9	8	4	1	2	0	0	19	0	0	1	0	0	1	0	0	5	0	0	0	0	0
Bacteria|Actinobacteria|Actinobacteridae|Bifidobacteriales|Bifidobacteriaceae|Bifidobacterium|Bifidobacterium longum|Bifidobacterium longum subsp. longum|Bifidobacterium longum subsp. longum 1-6B	12	6	8	4	2	2	1	31	0	0	1	0	0	5	0	0	4	0	0	0	0	0
Bacteria|Actinobacteria|Actinobacteridae|Bifidobacteriales|Bifidobacteriaceae|Bifidobacterium|Bifidobacterium longum|Bifidobacterium longum subsp. longum|Bifidobacterium longum subsp. longum 2-2B	107	70	67	23	26	1	0	317	0	3	3	0	0	10	0	0	62	0	0	0	0	1
Bacteria|Actinobacteria|Actinobacteridae|Bifidobacteriales|Bifidobacteriaceae|Bifidobacterium|Bifidobacterium longum|Bifidobacterium longum subsp. longum|Bifidobacterium longum subsp. longum 35B	4	15	10	6	5	0	1	36	0	0	1	0	0	1	0	0	21	0	1	0	0	0
Bacteria|Actinobacteria|Actinobacteridae|Bifidobacteriales|Bifidobacteriaceae|Bifidobacterium|Bifidobacterium longum|Bifidobacterium longum subsp. longum|Bifidobacterium longum subsp. longum 44B	15	8	5	2	4	0	1	41	0	0	0	0	0	1	0	0	10	0	1	0	0	0
Bacteria|Actinobacteria|Actinobacteridae|Bifidobacteriales|Bifidobacteriaceae|Bifidobacterium|Bifidobacterium longum|Bifidobacterium longum subsp. longum|Bifidobacterium longum subsp. longum ATCC 55813	66	50	37	17	26	1	0	195	0	0	5	0	0	7	0	0	48	0	1	0	0	0
Bacteria|Actinobacteria|Actinobacteridae|Bifidobacteriales|Bifidobacteriaceae|Bifidobacterium|Bifidobacterium longum|Bifidobacterium longum subsp. longum|Bifidobacterium longum subsp. longum BBMN68	22	19	13	3	3	0	0	40	0	0	2	1	0	4	0	0	20	0	0	0	0	0
Bacteria|Actinobacteria|Actinobacteridae|Bifidobacteriales|Bifidobacteriaceae|Bifidobacterium|Bifidobacterium longum|Bifidobacterium longum subsp. longum|Bifidobacterium longum subsp. longum F8	34	26	30	10	4	1	0	92	0	0	6	0	0	1	0	0	28	0	0	0	0	0
Bacteria|Actinobacteria|Actinobacteridae|Bifidobacteriales|Bifidobacteriaceae|Bifidobacterium|Bifidobacterium longum|Bifidobacterium longum subsp. longum|Bifidobacterium longum subsp. longum JCM 1217	3	2	1	1	0	0	0	8	0	0	0	0	0	1	0	0	3	0	0	0	0	0
Bacteria|Actinobacteria|Actinobacteridae|Bifidobacteriales|Bifidobacteriaceae|Bifidobacterium|Bifidobacterium longum|Bifidobacterium longum subsp. longum|Bifidobacterium longum subsp. longum JDM301	11	5	2	4	2	0	0	29	0	0	0	0	1	1	0	0	6	0	0	0	0	0
Bacteria|Actinobacteria|Actinobacteridae|Bifidobacteriales|Bifidobacteriaceae|Bifidobacterium|Bifidobacterium longum|Bifidobacterium longum subsp. longum|Bifidobacterium longum subsp. longum KACC 91563	6	4	4	6	3	0	0	42	0	0	2	0	0	0	0	0	4	0	0	0	0	0
Bacteria|Actinobacteria|Actinobacteridae|Bifidobacteriales|Bifidobacteriaceae|Bifidobacterium|Bifidobacterium pseudocatenulatum|Bifidobacterium pseudocatenulatum DSM 20438 = JCM 1200 = LMG 10505	0	0	0	0	0	0	0	0	0	0	0	0	0	0	0	0	0	0	0	0	0	0
Bacteria|Actinobacteria|Actinobacteridae|Bifidobacteriales|Bifidobacteriaceae|Bifidobacterium|Bifidobacterium pseudocatenulatum|Bifidobacterium pseudocatenulatum DSM 20438 = JCM 1200 = LMG 10505	14	18	14	4	3	0	0	48	0	0	2	1	1	5	0	0	18	0	0	0	0	0
Bacteria|Actinobacteria|Actinobacteridae|Bifidobacteriales|Bifidobacteriaceae|Bifidobacterium|Bifidobacterium sp. 12_1_47BFAA	328	265	214	112	103	5	1	906	0	1	16	2	1	26	3	0	238	3	1	1	0	0
Bacteria|Actinobacteria|Actinobacteridae|Bifidobacteriales|Bifidobacteriaceae|Gardnerella|Gardnerella vaginalis|Gardnerella vaginalis 00703Bmash	0	0	0	0	0	0	0	0	0	0	0	0	0	0	0	0	0	0	0	0	0	0
Bacteria|Actinobacteria|Actinobacteridae|Bifidobacteriales|Bifidobacteriaceae|Gardnerella|Gardnerella vaginalis|Gardnerella vaginalis 00703C2mash	0	0	0	0	0	0	0	0	0	0	0	0	0	0	0	0	0	0	0	0	0	0
Bacteria|Actinobacteria|Actinobacteridae|Bifidobacteriales|Bifidobacteriaceae|Gardnerella|Gardnerella vaginalis|Gardnerella vaginalis 00703Dmash	0	0	0	0	0	0	0	0	0	0	0	0	0	0	0	0	0	0	0	0	0	0
Bacteria|Actinobacteria|Actinobacteridae|Bifidobacteriales|Bifidobacteriaceae|Gardnerella|Gardnerella vaginalis|Gardnerella vaginalis 0288E	0	0	0	0	0	0	0	0	0	0	0	0	0	0	0	0	0	0	0	0	0	0
Bacteria|Actinobacteria|Actinobacteridae|Bifidobacteriales|Bifidobacteriaceae|Gardnerella|Gardnerella vaginalis|Gardnerella vaginalis 101	0	0	0	0	0	0	0	0	0	0	0	0	0	0	0	0	0	0	0	0	0	0
Bacteria|Actinobacteria|Actinobacteridae|Bifidobacteriales|Bifidobacteriaceae|Gardnerella|Gardnerella vaginalis|Gardnerella vaginalis 1400E	0	0	0	0	0	0	0	0	0	0	0	0	0	0	0	0	0	0	0	0	0	0
Bacteria|Actinobacteria|Actinobacteridae|Bifidobacteriales|Bifidobacteriaceae|Gardnerella|Gardnerella vaginalis|Gardnerella vaginalis 1500E	0	0	0	0	0	0	0	0	0	0	0	0	0	0	0	0	0	0	0	0	0	0
Bacteria|Actinobacteria|Actinobacteridae|Bifidobacteriales|Bifidobacteriaceae|Gardnerella|Gardnerella vaginalis|Gardnerella vaginalis 284V	0	0	0	0	0	0	0	0	0	0	0	0	0	0	0	0	0	0	0	0	0	0
Bacteria|Actinobacteria|Actinobacteridae|Bifidobacteriales|Bifidobacteriaceae|Gardnerella|Gardnerella vaginalis|Gardnerella vaginalis 315-A	0	0	0	0	0	0	0	0	0	0	0	0	0	0	0	0	0	0	0	0	0	0
Bacteria|Actinobacteria|Actinobacteridae|Bifidobacteriales|Bifidobacteriaceae|Gardnerella|Gardnerella vaginalis|Gardnerella vaginalis 409-05	1	0	0	0	0	0	0	0	0	0	0	0	0	0	0	0	0	0	0	0	0	0
Bacteria|Actinobacteria|Actinobacteridae|Bifidobacteriales|Bifidobacteriaceae|Gardnerella|Gardnerella vaginalis|Gardnerella vaginalis 41V	0	0	0	0	0	0	0	0	0	0	0	0	0	0	0	0	0	0	0	0	0	0
Bacteria|Actinobacteria|Actinobacteridae|Bifidobacteriales|Bifidobacteriaceae|Gardnerella|Gardnerella vaginalis|Gardnerella vaginalis 5-1	0	0	0	0	0	0	0	1	0	0	0	0	0	0	0	0	0	0	0	0	0	0
Bacteria|Actinobacteria|Actinobacteridae|Bifidobacteriales|Bifidobacteriaceae|Gardnerella|Gardnerella vaginalis|Gardnerella vaginalis 55152	0	0	0	0	0	0	0	1	0	0	0	0	0	0	0	0	0	0	0	0	0	0
Bacteria|Actinobacteria|Actinobacteridae|Bifidobacteriales|Bifidobacteriaceae|Gardnerella|Gardnerella vaginalis|Gardnerella vaginalis 6119V5	0	0	0	0	0	0	0	0	0	0	0	0	0	0	0	0	0	0	0	0	0	0
Bacteria|Actinobacteria|Actinobacteridae|Bifidobacteriales|Bifidobacteriaceae|Gardnerella|Gardnerella vaginalis|Gardnerella vaginalis 6420B	0	0	0	0	0	0	0	0	0	0	0	0	0	0	0	0	0	0	0	0	0	0
Bacteria|Actinobacteria|Actinobacteridae|Bifidobacteriales|Bifidobacteriaceae|Gardnerella|Gardnerella vaginalis|Gardnerella vaginalis 6420LIT	0	0	0	0	0	0	0	0	0	0	0	0	0	0	0	0	0	0	0	0	0	0
Bacteria|Actinobacteria|Actinobacteridae|Bifidobacteriales|Bifidobacteriaceae|Gardnerella|Gardnerella vaginalis|Gardnerella vaginalis 75712	0	0	0	0	0	0	0	0	0	0	0	0	0	0	0	0	0	0	0	0	0	0
Bacteria|Actinobacteria|Actinobacteridae|Bifidobacteriales|Bifidobacteriaceae|Gardnerella|Gardnerella vaginalis|Gardnerella vaginalis AMD	0	0	0	0	0	0	0	0	0	0	0	0	0	0	0	0	0	0	0	0	0	0
Bacteria|Actinobacteria|Actinobacteridae|Bifidobacteriales|Bifidobacteriaceae|Gardnerella|Gardnerella vaginalis|Gardnerella vaginalis ATCC 14018 = JCM 11026	0	0	0	0	0	0	0	0	0	0	0	0	0	0	0	0	0	0	0	0	0	0
Bacteria|Actinobacteria|Actinobacteridae|Bifidobacteriales|Bifidobacteriaceae|Gardnerella|Gardnerella vaginalis|Gardnerella vaginalis ATCC 14019	0	0	0	0	0	0	0	0	0	0	0	0	0	0	0	0	0	0	0	0	0	0
Bacteria|Actinobacteria|Actinobacteridae|Bifidobacteriales|Bifidobacteriaceae|Gardnerella|Gardnerella vaginalis|Gardnerella vaginalis HMP9231	0	0	0	0	0	0	0	0	0	0	0	0	0	0	0	0	0	0	0	0	0	0
Bacteria|Actinobacteria|Actinobacteridae|Bifidobacteriales|Bifidobacteriaceae|Parascardovia|Parascardovia denticolens|Parascardovia denticolens DSM 10105 = JCM 12538	0	0	0	0	0	0	0	0	0	0	0	0	0	0	0	0	0	0	0	0	0	0
Bacteria|Actinobacteria|Actinobacteridae|Bifidobacteriales|Bifidobacteriaceae|Parascardovia|Parascardovia denticolens|Parascardovia denticolens F0305	0	0	0	0	0	0	0	0	0	0	0	0	0	0	0	0	0	0	0	0	0	0
Bacteria|Actinobacteria|Actinobacteridae|Bifidobacteriales|Bifidobacteriaceae|Parascardovia|Parascardovia denticolens|Parascardovia denticolens IPLA 20019	0	0	0	0	0	0	0	0	0	0	0	0	0	0	0	0	0	0	0	0	0	0
Bacteria|Actinobacteria|Actinobacteridae|Bifidobacteriales|Bifidobacteriaceae|Scardovia|Scardovia inopinata|Scardovia inopinata F0304	0	0	0	0	0	0	0	0	0	0	0	0	0	0	0	0	0	0	0	0	0	0
Bacteria|Actinobacteria|Actinobacteridae|Bifidobacteriales|Bifidobacteriaceae|Scardovia|Scardovia wiggsiae|Scardovia wiggsiae F0424	0	0	0	0	0	0	0	0	0	0	0	0	0	0	0	0	0	0	0	0	0	0
Bacteria|Actinobacteria|Coriobacteridae|Coriobacteriales|Coriobacterineae|Coriobacteriaceae|Atopobium|Atopobium parvulum|Atopobium parvulum DSM 20469	0	0	1	0	0	0	0	1	0	0	0	0	0	0	0	0	0	0	0	0	0	0
Bacteria|Actinobacteria|Coriobacteridae|Coriobacteriales|Coriobacterineae|Coriobacteriaceae|Atopobium|Atopobium rimae|Atopobium rimae ATCC 49626	0	1	0	0	0	0	0	0	0	0	0	0	0	1	0	0	0	0	0	0	0	0
Bacteria|Actinobacteria|Coriobacteridae|Coriobacteriales|Coriobacterineae|Coriobacteriaceae|Atopobium|Atopobium sp. ICM58	4	0	1	1	1	0	0	2	0	0	0	0	0	0	0	0	2	0	0	0	0	0
Bacteria|Actinobacteria|Coriobacteridae|Coriobacteriales|Coriobacterineae|Coriobacteriaceae|Atopobium|Atopobium vaginae|Atopobium vaginae DSM 15829	3	2	0	0	0	0	0	0	0	0	0	0	0	0	0	0	1	0	0	0	0	0
Bacteria|Actinobacteria|Coriobacteridae|Coriobacteriales|Coriobacterineae|Coriobacteriaceae|Atopobium|Atopobium vaginae|Atopobium vaginae PB189-T1-4	0	0	0	0	0	0	0	0	0	0	0	0	0	0	0	0	0	0	0	0	0	0
Bacteria|Actinobacteria|Coriobacteridae|Coriobacteriales|Coriobacterineae|Coriobacteriaceae|Collinsella|Collinsella aerofaciens|Collinsella aerofaciens ATCC 25986	425	243	283	143	109	1	0	838	1	3	35	4	2	31	3	0	347	2	1	1	1	1
Bacteria|Actinobacteria|Coriobacteridae|Coriobacteriales|Coriobacterineae|Coriobacteriaceae|Collinsella|Collinsella intestinalis|Collinsella intestinalis DSM 13280	1	0	0	0	0	0	0	4	0	0	0	0	0	1	0	0	0	0	0	0	0	0
Bacteria|Actinobacteria|Coriobacteridae|Coriobacteriales|Coriobacterineae|Coriobacteriaceae|Collinsella|Collinsella stercoris|Collinsella stercoris DSM 13279	0	0	0	0	0	0	0	1	0	0	0	0	0	0	0	0	1	0	0	0	0	0
Bacteria|Actinobacteria|Coriobacteridae|Coriobacteriales|Coriobacterineae|Coriobacteriaceae|Collinsella|Collinsella tanakaei|Collinsella tanakaei YIT 12063	0	0	0	0	0	0	0	0	0	0	0	0	0	0	0	0	1	0	0	0	0	0
Bacteria|Actinobacteria|Coriobacteridae|Coriobacteriales|Coriobacterineae|Coriobacteriaceae|Coriobacterium|Coriobacterium glomerans|Coriobacterium glomerans PW2	0	0	0	0	0	0	0	0	0	0	0	0	0	0	0	0	0	0	0	0	0	0
Bacteria|Actinobacteria|Coriobacteridae|Coriobacteriales|Coriobacterineae|Coriobacteriaceae|Cryptobacterium|Cryptobacterium curtum|Cryptobacterium curtum DSM 15641	0	0	0	0	0	0	0	0	0	0	0	0	0	0	0	0	0	0	0	0	0	0
Bacteria|Actinobacteria|Coriobacteridae|Coriobacteriales|Coriobacterineae|Coriobacteriaceae|Eggerthella|Eggerthella lenta|Eggerthella lenta DSM 2243	4	4	6	4	4	0	1	12	0	0	0	1	0	2	0	0	10	0	0	0	0	0
Bacteria|Actinobacteria|Coriobacteridae|Coriobacteriales|Coriobacterineae|Coriobacteriaceae|Eggerthella|Eggerthella sp. 1_3_56FAA	0	0	0	0	0	0	0	0	0	0	0	0	0	0	0	0	1	0	0	0	0	0
Bacteria|Actinobacteria|Coriobacteridae|Coriobacteriales|Coriobacterineae|Coriobacteriaceae|Eggerthella|Eggerthella sp. HGA1	0	3	1	2	1	0	0	4	0	0	1	0	0	0	0	0	2	0	0	0	0	0
Bacteria|Actinobacteria|Coriobacteridae|Coriobacteriales|Coriobacterineae|Coriobacteriaceae|Eggerthella|Eggerthella sp. YY7918	0	0	0	0	0	0	0	0	0	0	0	0	0	0	0	0	0	0	0	0	0	0
Bacteria|Actinobacteria|Coriobacteridae|Coriobacteriales|Coriobacterineae|Coriobacteriaceae|Gordonibacter|Gordonibacter pamelaeae|Gordonibacter pamelaeae 7-10-1-b	12	18	27	16	8	0	0	41	0	0	9	0	0	5	0	0	24	0	0	0	0	0
Bacteria|Actinobacteria|Coriobacteridae|Coriobacteriales|Coriobacterineae|Coriobacteriaceae|Olsenella|Olsenella sp. oral taxon 809|Olsenella sp. oral taxon 809 str. F0356	1	0	0	0	0	0	0	0	0	0	0	0	0	0	0	0	0	0	0	0	0	0
Bacteria|Actinobacteria|Coriobacteridae|Coriobacteriales|Coriobacterineae|Coriobacteriaceae|Olsenella|Olsenella uli|Olsenella uli DSM 7084	0	0	0	0	1	0	0	1	0	0	0	0	0	0	0	0	1	0	0	0	0	0
Bacteria|Actinobacteria|Coriobacteridae|Coriobacteriales|Coriobacterineae|Coriobacteriaceae|Senegalimassilia|Senegalimassilia anaerobia|Senegalimassilia anaerobia JC110	0	0	0	0	0	0	0	0	0	0	0	0	0	0	0	0	0	0	0	0	0	0
Bacteria|Actinobacteria|Coriobacteridae|Coriobacteriales|Coriobacterineae|Coriobacteriaceae|Slackia|Slackia exigua|Slackia exigua ATCC 700122	0	0	0	0	0	0	0	0	0	0	0	0	0	0	0	0	0	0	0	0	0	0
Bacteria|Actinobacteria|Coriobacteridae|Coriobacteriales|Coriobacterineae|Coriobacteriaceae|Slackia|Slackia heliotrinireducens|Slackia heliotrinireducens DSM 20476	0	0	0	0	0	0	0	0	0	0	0	0	0	0	0	0	0	0	0	0	0	0
Bacteria|Actinobacteria|Coriobacteridae|Coriobacteriales|Coriobacterineae|Coriobacteriaceae|Slackia|Slackia sp. CM382	1	0	0	0	0	0	0	0	0	0	0	0	0	0	0	0	1	0	0	0	0	0
Bacteria|Actinobacteria|Rubrobacteridae|Rubrobacterales|Rubrobacterineae|Rubrobacteraceae|Rubrobacter|Rubrobacter xylanophilus|Rubrobacter xylanophilus DSM 9941	0	0	0	0	0	0	0	0	0	0	0	0	0	0	0	0	0	0	0	0	0	0
Bacteria|Actinobacteria|Rubrobacteridae|Solirubrobacterales|Conexibacteraceae|Conexibacter|Conexibacter woesei|Conexibacter woesei DSM 14684	0	0	0	0	0	0	0	0	0	0	0	0	0	0	0	0	0	0	0	0	0	0
Bacteria|Actinobacteria|Rubrobacteridae|Solirubrobacterales|Patulibacteraceae|Patulibacter|Patulibacter medicamentivorans	0	0	0	0	0	0	0	0	0	0	0	0	0	0	0	0	0	0	0	0	0	0
Bacteria|Actinobacteria|unclassified Actinobacteria|unclassified Actinobacteria (miscellaneous)|marine actinobacterium PHSC20C1	0	0	0	0	0	0	0	0	0	0	0	0	0	0	0	0	0	0	0	0	0	0
Bacteria|Aquificae|Aquificae|Aquificales|Aquificaceae|Aquifex|Aquifex aeolicus|Aquifex aeolicus VF5	0	0	0	0	0	0	0	0	0	0	0	0	0	0	0	0	0	0	0	0	0	0
Bacteria|Aquificae|Aquificae|Aquificales|Aquificaceae|Hydrogenivirga|Hydrogenivirga sp. 128-5-R1-1	0	0	0	0	0	0	0	0	0	0	0	0	0	0	0	0	0	0	0	0	0	0
Bacteria|Aquificae|Aquificae|Aquificales|Aquificaceae|Hydrogenobacter|Hydrogenobacter thermophilus|Hydrogenobacter thermophilus TK-6	0	0	0	0	0	0	0	0	0	0	0	0	0	0	0	0	0	0	0	0	0	0
Bacteria|Aquificae|Aquificae|Aquificales|Aquificaceae|Hydrogenobaculum|Hydrogenobaculum sp. Y04AAS1	0	0	0	0	0	0	0	0	0	0	0	0	0	0	0	0	0	0	0	0	0	0
Bacteria|Aquificae|Aquificae|Aquificales|Aquificaceae|Thermocrinis|Thermocrinis albus|Thermocrinis albus DSM 14484	0	0	0	0	0	0	0	0	0	0	0	0	0	0	0	0	0	0	0	0	0	0
Bacteria|Aquificae|Aquificae|Aquificales|Hydrogenothermaceae|Persephonella|Persephonella marina|Persephonella marina EX-H1	0	0	0	0	0	0	0	0	0	0	0	0	0	0	0	0	0	0	0	0	0	0
Bacteria|Aquificae|Aquificae|Aquificales|Hydrogenothermaceae|Sulfurihydrogenibium|Sulfurihydrogenibium azorense|Sulfurihydrogenibium azorense Az-Fu1	0	0	0	0	0	0	0	0	0	0	0	0	0	0	0	0	0	0	0	0	0	0
Bacteria|Aquificae|Aquificae|Aquificales|Hydrogenothermaceae|Sulfurihydrogenibium|Sulfurihydrogenibium sp. YO3AOP1	0	0	0	0	0	0	0	0	0	0	0	0	0	0	0	0	0	0	0	0	0	0
Bacteria|Aquificae|Aquificae|Aquificales|Hydrogenothermaceae|Sulfurihydrogenibium|Sulfurihydrogenibium yellowstonense|Sulfurihydrogenibium yellowstonense SS-5	0	0	0	0	0	0	0	0	0	0	0	0	0	0	0	0	0	0	0	0	0	0
Bacteria|Aquificae|Aquificae|Desulfurobacteriales|Desulfurobacteriaceae|Desulfurobacterium|Desulfurobacterium thermolithotrophum|Desulfurobacterium thermolithotrophum DSM 11699	0	0	0	0	0	0	0	0	0	0	0	0	0	0	0	0	0	0	0	0	0	0
Bacteria|Aquificae|Aquificae|Desulfurobacteriales|Desulfurobacteriaceae|Thermovibrio|Thermovibrio ammonificans|Thermovibrio ammonificans HB-1	0	0	0	0	0	0	0	0	0	0	0	0	0	0	0	0	0	0	0	0	0	0
Bacteria|Bacteroidetes|Bacteroidetes Order II. Incertae sedis|Rhodothermaceae|Rhodothermus|Rhodothermus marinus|Rhodothermus marinus DSM 4252	0	0	0	0	0	0	0	0	0	0	0	0	0	0	0	0	0	0	0	0	0	0
Bacteria|Bacteroidetes|Bacteroidetes Order II. Incertae sedis|Rhodothermaceae|Rhodothermus|Rhodothermus marinus|Rhodothermus marinus SG0.5JP17-172	0	0	0	0	0	0	0	0	0	0	0	0	0	0	0	0	0	0	0	0	0	0
Bacteria|Bacteroidetes|Bacteroidetes Order II. Incertae sedis|Rhodothermaceae|Salinibacter|Salinibacter ruber|Salinibacter ruber DSM 13855	0	0	0	0	0	0	0	0	0	0	0	0	0	0	0	0	0	0	0	0	0	0
Bacteria|Bacteroidetes|Bacteroidetes Order II. Incertae sedis|Rhodothermaceae|Salinibacter|Salinibacter ruber|Salinibacter ruber M8	0	0	0	0	0	0	0	0	0	0	0	0	0	0	0	0	0	0	0	0	0	0
Bacteria|Bacteroidetes|Bacteroidia|Bacteroidales|Bacteroidaceae|Bacteroides|Bacteroides caccae|Bacteroides caccae ATCC 43185	207	234	282	198	217	1	3	384	0	1	82	7	1	139	0	0	187	4	17	4	1	0
Bacteria|Bacteroidetes|Bacteroidia|Bacteroidales|Bacteroidaceae|Bacteroides|Bacteroides cellulosilyticus|Bacteroides cellulosilyticus DSM 14838	50	38	47	52	27	0	1	79	0	1	16	0	0	17	0	0	20	1	7	1	0	1
Bacteria|Bacteroidetes|Bacteroidia|Bacteroidales|Bacteroidaceae|Bacteroides|Bacteroides clarus|Bacteroides clarus YIT 12056	8	7	15	14	16	0	2	19	0	0	4	1	0	2	0	0	14	0	3	0	0	0
Bacteria|Bacteroidetes|Bacteroidia|Bacteroidales|Bacteroidaceae|Bacteroides|Bacteroides coprocola|Bacteroides coprocola DSM 17136	45	9	27	23	21	0	1	103	0	1	15	0	1	12	0	0	7	0	2	0	0	0
Bacteria|Bacteroidetes|Bacteroidia|Bacteroidales|Bacteroidaceae|Bacteroides|Bacteroides coprophilus|Bacteroides coprophilus DSM 18228 = JCM 13818	0	0	0	0	0	0	0	0	0	0	0	0	0	0	0	0	0	0	0	0	0	0
Bacteria|Bacteroidetes|Bacteroidia|Bacteroidales|Bacteroidaceae|Bacteroides|Bacteroides coprosuis|Bacteroides coprosuis DSM 18011	30	7	77	50	28	2	1	129	1	4	14	5	1	33	0	0	9	3	6	0	0	1
Bacteria|Bacteroidetes|Bacteroidia|Bacteroidales|Bacteroidaceae|Bacteroides|Bacteroides dorei|Bacteroides dorei 5_1_36/D4	16	7	16	6	14	0	0	21	0	0	5	0	0	4	0	0	3	0	1	0	0	0
Bacteria|Bacteroidetes|Bacteroidia|Bacteroidales|Bacteroidaceae|Bacteroides|Bacteroides dorei|Bacteroides dorei DSM 17855	4	8	6	7	5	0	1	13	0	0	3	0	1	4	0	0	1	1	2	0	0	0
Bacteria|Bacteroidetes|Bacteroidia|Bacteroidales|Bacteroidaceae|Bacteroides|Bacteroides eggerthii|Bacteroides eggerthii 1_2_48FAA	5	12	6	9	7	0	2	5	0	0	3	0	0	3	0	0	3	0	0	2	0	0
Bacteria|Bacteroidetes|Bacteroidia|Bacteroidales|Bacteroidaceae|Bacteroides|Bacteroides eggerthii|Bacteroides eggerthii DSM 20697	2	1	4	2	2	0	0	3	0	0	1	0	0	0	0	0	1	0	3	0	0	0
Bacteria|Bacteroidetes|Bacteroidia|Bacteroidales|Bacteroidaceae|Bacteroides|Bacteroides faecis|Bacteroides faecis MAJ27	69	26	50	33	25	0	0	120	1	4	22	1	0	16	0	0	15	1	2	1	0	0
Bacteria|Bacteroidetes|Bacteroidia|Bacteroidales|Bacteroidaceae|Bacteroides|Bacteroides finegoldii|Bacteroides finegoldii CL09T03C10	0	0	0	0	0	0	0	0	0	0	0	0	0	0	0	0	0	0	0	0	0	0
Bacteria|Bacteroidetes|Bacteroidia|Bacteroidales|Bacteroidaceae|Bacteroides|Bacteroides finegoldii|Bacteroides finegoldii DSM 17565	6	4	6	7	8	0	0	8	0	0	2	0	0	3	0	0	7	0	0	0	0	0
Bacteria|Bacteroidetes|Bacteroidia|Bacteroidales|Bacteroidaceae|Bacteroides|Bacteroides fluxus|Bacteroides fluxus YIT 12057	2	1	2	3	0	0	0	0	0	0	0	0	0	0	0	0	0	1	0	1	0	0
Bacteria|Bacteroidetes|Bacteroidia|Bacteroidales|Bacteroidaceae|Bacteroides|Bacteroides fragilis|Bacteroides fragilis 3_1_12	69	97	90	67	44	2	2	60	2	0	22	1	1	33	3	1	90	1	17	0	0	2
Bacteria|Bacteroidetes|Bacteroidia|Bacteroidales|Bacteroidaceae|Bacteroides|Bacteroides fragilis|Bacteroides fragilis 638R	5	1	3	3	2	0	0	5	0	0	1	0	0	1	0	0	1	0	1	0	0	0
Bacteria|Bacteroidetes|Bacteroidia|Bacteroidales|Bacteroidaceae|Bacteroides|Bacteroides fragilis|Bacteroides fragilis CL05T00C42	4	2	5	1	1	0	0	4	0	0	1	0	0	3	0	0	3	0	1	0	0	0
Bacteria|Bacteroidetes|Bacteroidia|Bacteroidales|Bacteroidaceae|Bacteroides|Bacteroides fragilis|Bacteroides fragilis NCTC 9343	0	2	1	2	1	0	0	2	0	0	0	0	0	1	0	0	1	0	0	0	0	0
Bacteria|Bacteroidetes|Bacteroidia|Bacteroidales|Bacteroidaceae|Bacteroides|Bacteroides fragilis|Bacteroides fragilis YCH46	0	1	1	0	1	0	0	0	0	0	0	0	0	0	0	0	0	0	0	0	0	0
Bacteria|Bacteroidetes|Bacteroidia|Bacteroidales|Bacteroidaceae|Bacteroides|Bacteroides helcogenes|Bacteroides helcogenes P 36-108	0	0	0	0	0	0	0	0	0	0	0	0	0	0	0	0	0	0	0	0	0	0
Bacteria|Bacteroidetes|Bacteroidia|Bacteroidales|Bacteroidaceae|Bacteroides|Bacteroides intestinalis|Bacteroides intestinalis DSM 17393	114	98	91	76	42	1	1	143	1	0	11	5	3	24	1	0	53	1	4	2	0	0
Bacteria|Bacteroidetes|Bacteroidia|Bacteroidales|Bacteroidaceae|Bacteroides|Bacteroides nordii|Bacteroides nordii CL02T12C05	13	21	26	15	9	0	0	14	0	0	7	0	1	8	0	0	10	0	1	0	0	0
Bacteria|Bacteroidetes|Bacteroidia|Bacteroidales|Bacteroidaceae|Bacteroides|Bacteroides ovatus|Bacteroides ovatus 3_8_47FAA	9	4	11	3	6	0	0	14	0	0	2	0	1	3	0	0	3	0	0	0	0	0
Bacteria|Bacteroidetes|Bacteroidia|Bacteroidales|Bacteroidaceae|Bacteroides|Bacteroides ovatus|Bacteroides ovatus ATCC 8483	24	19	27	12	22	0	0	33	0	0	6	0	0	8	0	0	12	1	1	1	0	0
Bacteria|Bacteroidetes|Bacteroidia|Bacteroidales|Bacteroidaceae|Bacteroides|Bacteroides ovatus|Bacteroides ovatus SD CMC 3f	121	81	97	45	39	0	3	198	0	2	14	2	1	24	0	0	57	4	3	2	0	1
Bacteria|Bacteroidetes|Bacteroidia|Bacteroidales|Bacteroidaceae|Bacteroides|Bacteroides plebeius|Bacteroides plebeius DSM 17135	20	10	20	17	33	0	1	181	0	3	28	0	0	24	1	0	9	0	6	1	0	0
Bacteria|Bacteroidetes|Bacteroidia|Bacteroidales|Bacteroidaceae|Bacteroides|Bacteroides salanitronis|Bacteroides salanitronis DSM 18170	24	15	50	34	37	0	0	47	0	0	10	0	0	15	0	0	27	2	9	1	0	0
Bacteria|Bacteroidetes|Bacteroidia|Bacteroidales|Bacteroidaceae|Bacteroides|Bacteroides salyersiae|Bacteroides salyersiae CL02T12C01	31	21	27	34	27	0	0	108	0	0	17	3	0	23	0	0	13	2	7	3	0	0
Bacteria|Bacteroidetes|Bacteroidia|Bacteroidales|Bacteroidaceae|Bacteroides|Bacteroides sp. 1_1_14	10	7	8	3	2	0	0	12	0	0	2	0	0	4	0	0	0	0	0	0	0	0
Bacteria|Bacteroidetes|Bacteroidia|Bacteroidales|Bacteroidaceae|Bacteroides|Bacteroides sp. 1_1_30	3	4	4	0	2	0	0	4	0	0	4	0	0	1	0	0	1	0	1	0	0	0
Bacteria|Bacteroidetes|Bacteroidia|Bacteroidales|Bacteroidaceae|Bacteroides|Bacteroides sp. 1_1_6	1	4	6	5	4	0	1	15	0	0	3	0	0	9	0	0	4	0	1	0	0	0
Bacteria|Bacteroidetes|Bacteroidia|Bacteroidales|Bacteroidaceae|Bacteroides|Bacteroides sp. 2_1_16	1	0	0	0	0	0	0	3	0	0	0	0	0	1	0	0	1	0	0	0	0	0
Bacteria|Bacteroidetes|Bacteroidia|Bacteroidales|Bacteroidaceae|Bacteroides|Bacteroides sp. 2_1_22	1	2	0	1	1	0	0	3	0	0	1	0	0	1	0	0	1	0	0	0	0	0
Bacteria|Bacteroidetes|Bacteroidia|Bacteroidales|Bacteroidaceae|Bacteroides|Bacteroides sp. 2_1_33B	8	9	5	5	7	0	0	14	0	1	4	0	0	6	0	0	11	0	3	1	0	0
Bacteria|Bacteroidetes|Bacteroidia|Bacteroidales|Bacteroidaceae|Bacteroides|Bacteroides sp. 2_1_56FAA	2	0	3	1	2	0	0	2	0	0	0	0	0	0	0	0	1	0	0	0	0	0
Bacteria|Bacteroidetes|Bacteroidia|Bacteroidales|Bacteroidaceae|Bacteroides|Bacteroides sp. 2_1_7	6	2	3	2	1	0	0	9	0	0	0	0	0	3	0	0	2	0	0	0	0	0
Bacteria|Bacteroidetes|Bacteroidia|Bacteroidales|Bacteroidaceae|Bacteroides|Bacteroides sp. 2_2_4	9	10	7	7	10	0	0	27	0	0	5	2	1	12	0	0	8	1	2	2	0	0
Bacteria|Bacteroidetes|Bacteroidia|Bacteroidales|Bacteroidaceae|Bacteroides|Bacteroides sp. 3_1_19	9	12	13	12	4	0	1	9	0	0	3	0	0	11	0	0	3	0	0	0	0	0
Bacteria|Bacteroidetes|Bacteroidia|Bacteroidales|Bacteroidaceae|Bacteroides|Bacteroides sp. 3_1_23	3	2	6	0	0	0	0	10	0	0	4	1	0	1	0	0	1	0	0	0	0	0
Bacteria|Bacteroidetes|Bacteroidia|Bacteroidales|Bacteroidaceae|Bacteroides|Bacteroides sp. 3_1_33FAA	3	1	2	3	9	0	0	11	0	0	2	0	0	0	0	0	1	0	0	0	0	0
Bacteria|Bacteroidetes|Bacteroidia|Bacteroidales|Bacteroidaceae|Bacteroides|Bacteroides sp. 3_1_40A	5	1	7	6	3	0	0	26	0	0	0	0	0	5	0	0	5	0	4	0	0	0
Bacteria|Bacteroidetes|Bacteroidia|Bacteroidales|Bacteroidaceae|Bacteroides|Bacteroides sp. 3_2_5	1	0	4	0	1	0	0	0	0	0	0	0	0	0	0	0	1	0	0	0	0	0
Bacteria|Bacteroidetes|Bacteroidia|Bacteroidales|Bacteroidaceae|Bacteroides|Bacteroides sp. 4_1_36	33	28	29	12	10	0	0	22	0	0	3	0	0	7	0	0	11	2	1	1	0	1
Bacteria|Bacteroidetes|Bacteroidia|Bacteroidales|Bacteroidaceae|Bacteroides|Bacteroides sp. 4_3_47FAA	7	5	4	4	7	0	2	14	0	0	4	1	0	4	0	0	0	2	2	1	0	0
Bacteria|Bacteroidetes|Bacteroidia|Bacteroidales|Bacteroidaceae|Bacteroides|Bacteroides sp. 9_1_42FAA	5	4	9	6	2	0	0	13	0	0	2	1	0	5	0	0	0	0	1	1	0	0
Bacteria|Bacteroidetes|Bacteroidia|Bacteroidales|Bacteroidaceae|Bacteroides|Bacteroides sp. D1	1	3	0	0	4	0	0	1	0	0	6	0	0	0	0	0	1	0	0	0	0	0
Bacteria|Bacteroidetes|Bacteroidia|Bacteroidales|Bacteroidaceae|Bacteroides|Bacteroides sp. D2	8	5	14	7	7	0	0	21	0	0	4	1	0	2	0	0	5	2	0	0	0	0
Bacteria|Bacteroidetes|Bacteroidia|Bacteroidales|Bacteroidaceae|Bacteroides|Bacteroides sp. D20	20	19	28	24	14	0	0	47	0	1	5	0	0	11	0	0	18	1	1	1	0	0
Bacteria|Bacteroidetes|Bacteroidia|Bacteroidales|Bacteroidaceae|Bacteroides|Bacteroides sp. D22	5	4	3	2	3	0	0	4	0	0	0	0	0	1	0	0	4	0	0	0	0	0
Bacteria|Bacteroidetes|Bacteroidia|Bacteroidales|Bacteroidaceae|Bacteroides|Bacteroides stercoris|Bacteroides stercoris ATCC 43183	22	20	35	43	27	0	6	117	0	1	33	3	1	27	0	0	17	1	2	0	0	0
Bacteria|Bacteroidetes|Bacteroidia|Bacteroidales|Bacteroidaceae|Bacteroides|Bacteroides thetaiotaomicron|Bacteroides thetaiotaomicron VPI-5482	46	25	29	11	9	1	0	34	0	0	6	0	0	8	0	0	8	0	4	0	0	0
Bacteria|Bacteroidetes|Bacteroidia|Bacteroidales|Bacteroidaceae|Bacteroides|Bacteroides uniformis|Bacteroides uniformis ATCC 8492	12	7	19	10	8	0	0	14	0	0	2	0	0	1	0	0	4	0	1	0	0	0
Bacteria|Bacteroidetes|Bacteroidia|Bacteroidales|Bacteroidaceae|Bacteroides|Bacteroides vulgatus|Bacteroides vulgatus ATCC 8482	5	5	15	12	9	0	0	15	0	0	6	0	0	5	0	0	11	0	1	0	0	0
Bacteria|Bacteroidetes|Bacteroidia|Bacteroidales|Bacteroidaceae|Bacteroides|Bacteroides vulgatus|Bacteroides vulgatus PC510	8	6	8	6	6	0	0	11	0	0	2	0	0	5	0	0	1	0	0	0	0	0
Bacteria|Bacteroidetes|Bacteroidia|Bacteroidales|Bacteroidaceae|Bacteroides|Bacteroides xylanisolvens|Bacteroides xylanisolvens SD CC 1b	0	0	0	0	0	0	0	0	0	0	0	0	0	0	0	0	0	0	0	0	0	0
Bacteria|Bacteroidetes|Bacteroidia|Bacteroidales|Bacteroidaceae|Bacteroides|Bacteroides xylanisolvens|Bacteroides xylanisolvens SD CC 2a	0	0	0	0	0	0	0	0	0	0	0	0	0	0	0	0	0	0	0	0	0	0
Bacteria|Bacteroidetes|Bacteroidia|Bacteroidales|Bacteroidaceae|Bacteroides|Bacteroides xylanisolvens|Bacteroides xylanisolvens XB1A	5	1	0	1	2	0	0	8	0	0	0	1	0	3	0	0	1	0	0	0	0	0
Bacteria|Bacteroidetes|Bacteroidia|Bacteroidales|Marinilabiliaceae|Anaerophaga|Anaerophaga thermohalophila|Anaerophaga thermohalophila DSM 12881	0	0	0	0	0	0	0	0	0	0	0	0	0	0	0	0	0	0	0	0	0	0
Bacteria|Bacteroidetes|Bacteroidia|Bacteroidales|Marinilabiliaceae|Thermophagus|Thermophagus xiamenensis	0	0	0	0	0	0	0	0	0	0	0	0	0	0	0	0	0	0	0	0	0	0
Bacteria|Bacteroidetes|Bacteroidia|Bacteroidales|Porphyromonadaceae|Dysgonomonas|Dysgonomonas gadei|Dysgonomonas gadei ATCC BAA-286	3	2	5	3	2	0	0	2	0	0	0	0	0	4	0	0	1	2	0	0	0	0
Bacteria|Bacteroidetes|Bacteroidia|Bacteroidales|Porphyromonadaceae|Dysgonomonas|Dysgonomonas mossii|Dysgonomonas mossii DSM 22836	19	5	18	14	4	0	0	18	0	0	2	3	13	6	0	0	15	4	1	0	0	0
Bacteria|Bacteroidetes|Bacteroidia|Bacteroidales|Porphyromonadaceae|Odoribacter|Odoribacter laneus|Odoribacter laneus YIT 12061	1	1	1	2	0	0	0	5	0	0	1	0	0	0	0	0	1	0	0	0	0	0
Bacteria|Bacteroidetes|Bacteroidia|Bacteroidales|Porphyromonadaceae|Odoribacter|Odoribacter splanchnicus|Odoribacter splanchnicus DSM 220712	0	0	0	0	0	0	0	0	0	0	0	0	0	0	0	0	0	0	0	0	0	0
Bacteria|Bacteroidetes|Bacteroidia|Bacteroidales|Porphyromonadaceae|Paludibacter|Paludibacter propionicigenes|Paludibacter propionicigenes WB4	0	1	9	3	2	11	0	5	25	0	2	0	141	0	0	0	2	0	2	0	0	1
Bacteria|Bacteroidetes|Bacteroidia|Bacteroidales|Porphyromonadaceae|Parabacteroides|Parabacteroides distasonis|Parabacteroides distasonis ATCC 8503	2	8	2	0	1	0	0	8	0	0	0	0	0	2	0	0	1	0	0	0	0	0
Bacteria|Bacteroidetes|Bacteroidia|Bacteroidales|Porphyromonadaceae|Parabacteroides|Parabacteroides johnsonii|Parabacteroides johnsonii DSM 18315	5	5	3	9	11	0	1	7	0	0	6	1	2	4	0	0	8	0	0	0	0	0
Bacteria|Bacteroidetes|Bacteroidia|Bacteroidales|Porphyromonadaceae|Parabacteroides|Parabacteroides merdae|Parabacteroides merdae ATCC 43184	52	65	99	76	72	0	2	133	0	2	35	1	1	68	1	0	59	1	10	1	0	0
Bacteria|Bacteroidetes|Bacteroidia|Bacteroidales|Porphyromonadaceae|Parabacteroides|Parabacteroides sp. 20_3	0	0	0	0	0	0	0	0	0	0	0	0	0	0	0	0	0	0	0	0	0	0
Bacteria|Bacteroidetes|Bacteroidia|Bacteroidales|Porphyromonadaceae|Parabacteroides|Parabacteroides sp. D13	25	34	17	14	15	0	0	31	0	1	8	2	0	5	0	0	13	0	1	0	0	0
Bacteria|Bacteroidetes|Bacteroidia|Bacteroidales|Porphyromonadaceae|Porphyromonas|Porphyromonas asaccharolytica|Porphyromonas asaccharolytica DSM 20707	0	0	0	0	0	0	0	0	0	0	0	0	0	0	0	0	0	0	0	0	0	0
Bacteria|Bacteroidetes|Bacteroidia|Bacteroidales|Porphyromonadaceae|Porphyromonas|Porphyromonas asaccharolytica|Porphyromonas asaccharolytica PR426713P-I	0	0	0	0	0	0	0	0	0	0	0	0	0	0	0	0	0	0	0	0	0	0
Bacteria|Bacteroidetes|Bacteroidia|Bacteroidales|Porphyromonadaceae|Porphyromonas|Porphyromonas endodontalis|Porphyromonas endodontalis ATCC 35406	0	0	0	0	0	0	0	0	0	0	0	0	0	0	0	0	0	0	0	0	0	0
Bacteria|Bacteroidetes|Bacteroidia|Bacteroidales|Porphyromonadaceae|Porphyromonas|Porphyromonas gingivalis|Porphyromonas gingivalis ATCC 33277	0	0	0	0	0	0	0	0	0	0	0	0	0	0	0	0	0	0	0	0	0	0
Bacteria|Bacteroidetes|Bacteroidia|Bacteroidales|Porphyromonadaceae|Porphyromonas|Porphyromonas gingivalis|Porphyromonas gingivalis TDC60	0	0	0	0	0	0	0	0	0	0	0	0	0	0	0	0	0	0	0	0	0	0
Bacteria|Bacteroidetes|Bacteroidia|Bacteroidales|Porphyromonadaceae|Porphyromonas|Porphyromonas gingivalis|Porphyromonas gingivalis W50	0	0	0	0	0	0	0	0	0	0	0	0	0	0	0	0	0	0	0	0	0	0
Bacteria|Bacteroidetes|Bacteroidia|Bacteroidales|Porphyromonadaceae|Porphyromonas|Porphyromonas gingivalis|Porphyromonas gingivalis W83	0	0	0	0	0	0	0	0	0	0	0	0	0	0	0	0	0	0	0	0	0	0
Bacteria|Bacteroidetes|Bacteroidia|Bacteroidales|Porphyromonadaceae|Porphyromonas|Porphyromonas sp. oral taxon 279|Porphyromonas sp. oral taxon 279 str. F0450	1	1	0	0	0	0	0	0	0	0	0	1	0	0	0	0	0	0	0	0	0	0
Bacteria|Bacteroidetes|Bacteroidia|Bacteroidales|Porphyromonadaceae|Porphyromonas|Porphyromonas uenonis|Porphyromonas uenonis 60-3	0	0	0	0	0	0	0	0	0	0	0	0	0	0	0	0	0	0	0	0	0	0
Bacteria|Bacteroidetes|Bacteroidia|Bacteroidales|Porphyromonadaceae|Tannerella|Tannerella forsythia|Tannerella forsythia ATCC 43037	0	0	0	0	0	0	0	0	0	0	0	0	0	0	0	0	0	0	0	0	0	0
Bacteria|Bacteroidetes|Bacteroidia|Bacteroidales|Porphyromonadaceae|Tannerella|Tannerella sp. 6_1_58FAA_CT1	3	1	8	2	0	0	0	2	0	0	1	0	0	0	0	0	1	0	0	1	0	0
Bacteria|Bacteroidetes|Bacteroidia|Bacteroidales|Prevotellaceae|Alloprevotella|Alloprevotella rava|Alloprevotella rava F0323	0	0	0	0	0	0	0	0	0	0	0	0	0	0	0	0	0	0	0	0	0	0
Bacteria|Bacteroidetes|Bacteroidia|Bacteroidales|Prevotellaceae|Alloprevotella|Alloprevotella tannerae|Prevotella tannerae ATCC 51259	1	0	0	0	0	0	0	0	0	0	0	0	0	0	0	0	0	0	0	0	0	0
Bacteria|Bacteroidetes|Bacteroidia|Bacteroidales|Prevotellaceae|Paraprevotella|Paraprevotella clara|Paraprevotella clara YIT 11840	0	0	0	0	0	0	0	0	0	0	0	0	0	0	0	0	0	0	0	0	0	0
Bacteria|Bacteroidetes|Bacteroidia|Bacteroidales|Prevotellaceae|Paraprevotella|Paraprevotella xylaniphila|Paraprevotella xylaniphila YIT 11841	2	1	4	6	2	0	0	5	0	0	2	0	0	6	0	0	2	0	1	1	0	0
Bacteria|Bacteroidetes|Bacteroidia|Bacteroidales|Prevotellaceae|Prevotella|Prevotella amnii|Prevotella amnii CRIS 21A-A	1	0	0	0	0	0	0	0	0	0	0	0	0	0	0	0	0	0	0	0	0	0
Bacteria|Bacteroidetes|Bacteroidia|Bacteroidales|Prevotellaceae|Prevotella|Prevotella bergensis|Prevotella bergensis DSM 17361	11	3	10	7	2	0	0	17	0	0	1	0	0	3	0	0	3	0	0	0	0	0
Bacteria|Bacteroidetes|Bacteroidia|Bacteroidales|Prevotellaceae|Prevotella|Prevotella bivia|Prevotella bivia DSM 20514	1	0	0	0	0	0	0	0	0	0	0	0	0	0	0	0	0	0	0	0	0	0
Bacteria|Bacteroidetes|Bacteroidia|Bacteroidales|Prevotellaceae|Prevotella|Prevotella bivia|Prevotella bivia JCVIHMP010	0	0	0	0	0	0	0	0	0	0	0	0	0	0	0	0	0	0	0	0	0	0
Bacteria|Bacteroidetes|Bacteroidia|Bacteroidales|Prevotellaceae|Prevotella|Prevotella bryantii|Prevotella bryantii B14	0	3	4	1	2	0	0	0	0	0	0	0	0	3	0	0	2	0	0	0	0	0
Bacteria|Bacteroidetes|Bacteroidia|Bacteroidales|Prevotellaceae|Prevotella|Prevotella buccae|Prevotella buccae ATCC 33574	0	0	0	0	0	0	0	0	0	0	0	0	0	1	0	0	0	0	0	0	0	0
Bacteria|Bacteroidetes|Bacteroidia|Bacteroidales|Prevotellaceae|Prevotella|Prevotella buccae|Prevotella buccae D17	6	0	0	2	1	0	0	3	0	0	2	0	0	2	0	0	2	0	0	0	0	0
Bacteria|Bacteroidetes|Bacteroidia|Bacteroidales|Prevotellaceae|Prevotella|Prevotella buccalis|Prevotella buccalis ATCC 35310	0	0	0	0	0	0	0	1	0	0	0	0	0	0	0	0	0	0	0	0	0	0
Bacteria|Bacteroidetes|Bacteroidia|Bacteroidales|Prevotellaceae|Prevotella|Prevotella copri|Prevotella copri DSM 18205	1311	446	824	741	566	4	11	1830	1	28	350	35	15	279	4	0	416	13	43	6	0	3
Bacteria|Bacteroidetes|Bacteroidia|Bacteroidales|Prevotellaceae|Prevotella|Prevotella dentalis|Prevotella dentalis DSM 3688	2	0	0	0	0	0	0	0	0	0	0	0	0	0	1	0	2	0	0	0	0	0
Bacteria|Bacteroidetes|Bacteroidia|Bacteroidales|Prevotellaceae|Prevotella|Prevotella denticola|Prevotella denticola CRIS 18C-A	0	0	0	0	0	0	0	0	0	0	0	0	0	0	0	0	0	0	0	0	0	0
Bacteria|Bacteroidetes|Bacteroidia|Bacteroidales|Prevotellaceae|Prevotella|Prevotella denticola|Prevotella denticola F0289	0	0	0	0	0	0	0	1	0	0	0	0	0	0	0	0	0	0	0	0	0	0
Bacteria|Bacteroidetes|Bacteroidia|Bacteroidales|Prevotellaceae|Prevotella|Prevotella disiens|Prevotella disiens FB035-09AN	1	0	0	0	0	0	0	1	0	0	0	0	0	0	0	0	0	0	0	0	0	0
Bacteria|Bacteroidetes|Bacteroidia|Bacteroidales|Prevotellaceae|Prevotella|Prevotella histicola|Prevotella histicola F0411	0	0	0	0	0	0	0	0	0	0	0	0	0	0	0	0	0	0	0	0	0	0
Bacteria|Bacteroidetes|Bacteroidia|Bacteroidales|Prevotellaceae|Prevotella|Prevotella intermedia|Prevotella intermedia 17	0	0	0	0	0	0	0	0	0	0	0	0	0	0	0	0	0	0	0	0	0	0
Bacteria|Bacteroidetes|Bacteroidia|Bacteroidales|Prevotellaceae|Prevotella|Prevotella maculosa|Prevotella maculosa OT 289	0	0	0	0	0	0	0	0	0	0	0	0	0	0	0	0	0	0	0	0	0	0
Bacteria|Bacteroidetes|Bacteroidia|Bacteroidales|Prevotellaceae|Prevotella|Prevotella marshii|Prevotella marshii DSM 16973	0	0	0	0	0	0	0	0	0	0	0	0	0	0	0	0	0	0	0	0	0	0
Bacteria|Bacteroidetes|Bacteroidia|Bacteroidales|Prevotellaceae|Prevotella|Prevotella melaninogenica|Prevotella melaninogenica ATCC 25845	0	0	2	0	0	0	0	3	0	0	0	0	0	0	0	0	0	0	0	0	0	0
Bacteria|Bacteroidetes|Bacteroidia|Bacteroidales|Prevotellaceae|Prevotella|Prevotella melaninogenica|Prevotella melaninogenica D18	0	0	0	0	3	0	0	1	0	0	0	0	0	0	0	0	0	0	0	0	0	0
Bacteria|Bacteroidetes|Bacteroidia|Bacteroidales|Prevotellaceae|Prevotella|Prevotella micans|Prevotella micans F0438	0	0	0	0	0	0	0	0	0	0	0	0	0	0	0	0	0	0	0	0	0	0
Bacteria|Bacteroidetes|Bacteroidia|Bacteroidales|Prevotellaceae|Prevotella|Prevotella multiformis|Prevotella multiformis DSM 16608	0	0	0	0	0	0	0	0	0	0	0	0	0	0	0	0	0	0	0	0	0	0
Bacteria|Bacteroidetes|Bacteroidia|Bacteroidales|Prevotellaceae|Prevotella|Prevotella multisaccharivorax|Prevotella multisaccharivorax DSM 17128	11	3	1	6	2	0	0	20	0	0	2	0	0	0	0	0	1	0	0	0	0	0
Bacteria|Bacteroidetes|Bacteroidia|Bacteroidales|Prevotellaceae|Prevotella|Prevotella nigrescens|Prevotella nigrescens ATCC 33563	0	0	0	0	0	0	0	0	0	0	0	0	0	0	0	0	0	0	0	0	0	0
Bacteria|Bacteroidetes|Bacteroidia|Bacteroidales|Prevotellaceae|Prevotella|Prevotella oralis|Prevotella oralis ATCC 33269	0	0	0	0	0	0	0	0	0	0	0	0	0	0	0	0	0	0	0	0	0	0
Bacteria|Bacteroidetes|Bacteroidia|Bacteroidales|Prevotellaceae|Prevotella|Prevotella oris|Prevotella oris C735	0	0	0	0	0	0	0	0	0	0	0	0	0	0	0	0	0	0	0	0	0	0
Bacteria|Bacteroidetes|Bacteroidia|Bacteroidales|Prevotellaceae|Prevotella|Prevotella oris|Prevotella oris F0302	0	0	0	0	0	0	0	0	0	0	0	0	0	0	0	0	0	0	0	0	0	0
Bacteria|Bacteroidetes|Bacteroidia|Bacteroidales|Prevotellaceae|Prevotella|Prevotella oulorum|Prevotella oulorum F0390	0	0	0	0	0	0	0	0	0	0	0	0	0	0	0	0	0	0	0	0	0	0
Bacteria|Bacteroidetes|Bacteroidia|Bacteroidales|Prevotellaceae|Prevotella|Prevotella pallens|Prevotella pallens ATCC 700821	2	1	2	1	0	0	0	5	0	0	0	0	0	0	0	0	2	0	0	0	0	0
Bacteria|Bacteroidetes|Bacteroidia|Bacteroidales|Prevotellaceae|Prevotella|Prevotella ruminicola|Prevotella ruminicola 23	2	3	12	4	2	0	0	0	0	0	8	0	0	2	0	0	0	0	0	0	0	0
Bacteria|Bacteroidetes|Bacteroidia|Bacteroidales|Prevotellaceae|Prevotella|Prevotella salivae|Prevotella salivae DSM 15606	0	0	0	0	0	0	0	0	0	0	0	0	0	0	0	0	0	0	0	0	0	0
Bacteria|Bacteroidetes|Bacteroidia|Bacteroidales|Prevotellaceae|Prevotella|Prevotella sp. C561	0	1	2	4	1	0	0	4	0	0	0	0	0	0	0	0	3	0	0	0	0	0
Bacteria|Bacteroidetes|Bacteroidia|Bacteroidales|Prevotellaceae|Prevotella|Prevotella sp. MSX73	0	2	0	0	0	0	0	0	0	0	0	0	0	0	0	0	0	0	0	0	0	0
Bacteria|Bacteroidetes|Bacteroidia|Bacteroidales|Prevotellaceae|Prevotella|Prevotella sp. oral taxon 299|Prevotella sp. oral taxon 299 str. F0039	0	0	1	0	0	0	0	0	0	0	0	0	0	0	0	0	0	0	0	0	0	0
Bacteria|Bacteroidetes|Bacteroidia|Bacteroidales|Prevotellaceae|Prevotella|Prevotella sp. oral taxon 306|Prevotella sp. oral taxon 306 str. F0472	0	0	0	0	0	0	0	1	0	0	0	0	0	0	0	0	0	0	0	0	0	0
Bacteria|Bacteroidetes|Bacteroidia|Bacteroidales|Prevotellaceae|Prevotella|Prevotella sp. oral taxon 317|Prevotella sp. oral taxon 317 str. F0108	0	0	0	0	0	0	0	0	0	0	0	0	0	0	0	0	0	0	0	0	0	0
Bacteria|Bacteroidetes|Bacteroidia|Bacteroidales|Prevotellaceae|Prevotella|Prevotella sp. oral taxon 472|Prevotella sp. oral taxon 472 str. F0295	0	0	0	0	0	0	0	0	0	0	0	0	0	0	0	0	0	0	0	0	0	0
Bacteria|Bacteroidetes|Bacteroidia|Bacteroidales|Prevotellaceae|Prevotella|Prevotella stercorea|Prevotella stercorea DSM 18206	196	62	108	97	104	0	5	338	0	8	87	5	3	66	0	0	50	3	5	1	0	3
Bacteria|Bacteroidetes|Bacteroidia|Bacteroidales|Prevotellaceae|Prevotella|Prevotella timonensis|Prevotella timonensis CRIS 5C-B1	1	1	0	0	0	0	0	2	0	0	0	0	0	0	0	0	0	0	0	0	0	0
Bacteria|Bacteroidetes|Bacteroidia|Bacteroidales|Prevotellaceae|Prevotella|Prevotella veroralis|Prevotella veroralis F0319	1	0	0	0	0	0	0	1	0	0	0	0	0	0	0	0	0	0	0	0	0	0
Bacteria|Bacteroidetes|Bacteroidia|Bacteroidales|Rikenellaceae|Alistipes|Alistipes finegoldii|Alistipes finegoldii DSM 17242	11	8	12	13	14	0	1	13	1	0	4	2	0	9	0	0	7	1	5	0	0	0
Bacteria|Bacteroidetes|Bacteroidia|Bacteroidales|Rikenellaceae|Alistipes|Alistipes indistinctus|Alistipes indistinctus YIT 12060	18	25	31	29	19	0	1	21	0	0	10	0	1	19	0	0	33	2	9	2	0	0
Bacteria|Bacteroidetes|Bacteroidia|Bacteroidales|Rikenellaceae|Alistipes|Alistipes putredinis|Alistipes putredinis DSM 17216	140	147	199	198	106	1	15	365	0	3	92	13	7	93	1	0	196	5	40	14	1	1
Bacteria|Bacteroidetes|Bacteroidia|Bacteroidales|Rikenellaceae|Alistipes|Alistipes shahii|Alistipes shahii WAL 8301	21	14	29	44	38	0	5	70	0	1	41	7	2	39	0	0	42	1	12	0	0	0
Bacteria|Bacteroidetes|Bacteroidia|Bacteroidales|Rikenellaceae|Alistipes|Alistipes sp. HGB5	1	1	4	3	3	0	0	5	0	0	1	0	0	2	0	0	1	0	0	0	0	0
Bacteria|Bacteroidetes|Bacteroidia|Bacteroidales|unclassified Bacteroidales|Candidatus Azobacteroides|Candidatus Azobacteroides pseudotrichonymphae|Candidatus Azobacteroides pseudotrichonymphae genomovar. CFP2	0	0	0	0	0	0	0	0	0	0	0	0	0	0	0	0	0	0	0	0	0	0
Bacteria|Bacteroidetes|Cytophagia|Cytophagales|Amoebophilaceae|Candidatus Amoebophilus|Candidatus Amoebophilus asiaticus|Candidatus Amoebophilus asiaticus 5a2	0	0	0	0	0	0	0	0	0	0	0	0	0	0	0	0	0	0	0	0	0	0
Bacteria|Bacteroidetes|Cytophagia|Cytophagales|Cyclobacteriaceae|Algoriphagus|Algoriphagus machipongonensis	0	0	0	0	0	0	0	0	0	0	0	0	0	0	0	0	0	0	0	0	0	0
Bacteria|Bacteroidetes|Cytophagia|Cytophagales|Cyclobacteriaceae|Belliella|Belliella baltica|Belliella baltica DSM 15883	0	0	1	0	0	0	0	0	0	0	1	0	0	0	0	0	0	1	0	0	0	0
Bacteria|Bacteroidetes|Cytophagia|Cytophagales|Cyclobacteriaceae|Cyclobacterium|Cyclobacterium marinum|Cyclobacterium marinum DSM 745	0	0	0	0	0	0	0	0	0	0	0	0	0	0	0	0	0	0	0	0	0	0
Bacteria|Bacteroidetes|Cytophagia|Cytophagales|Cytophagaceae|Cytophaga|Cytophaga hutchinsonii|Cytophaga hutchinsonii ATCC 33406	0	0	0	0	0	0	0	0	0	0	0	0	0	0	0	0	0	0	0	0	0	0
Bacteria|Bacteroidetes|Cytophagia|Cytophagales|Cytophagaceae|Dyadobacter|Dyadobacter fermentans|Dyadobacter fermentans DSM 18053	1	0	0	0	3	0	0	0	0	0	2	1	0	0	0	0	0	4	1	0	0	0
Bacteria|Bacteroidetes|Cytophagia|Cytophagales|Cytophagaceae|Flexibacter|Flexibacter litoralis|Flexibacter litoralis DSM 6794	0	0	0	0	0	0	0	0	0	0	0	0	0	0	0	0	0	0	0	0	0	0
Bacteria|Bacteroidetes|Cytophagia|Cytophagales|Cytophagaceae|Leadbetterella|Leadbetterella byssophila|Leadbetterella byssophila DSM 17132	1	0	0	0	0	0	0	2	0	0	0	0	0	0	0	0	0	0	0	0	0	0
Bacteria|Bacteroidetes|Cytophagia|Cytophagales|Cytophagaceae|Microscilla|Microscilla marina|Microscilla marina ATCC 23134	0	0	0	0	0	0	0	0	0	0	0	0	0	0	0	0	0	0	0	0	0	0
Bacteria|Bacteroidetes|Cytophagia|Cytophagales|Cytophagaceae|Runella|Runella slithyformis|Runella slithyformis DSM 19594	0	0	0	0	0	0	0	0	0	1	1	3	0	0	0	0	0	0	0	0	0	0
Bacteria|Bacteroidetes|Cytophagia|Cytophagales|Cytophagaceae|Spirosoma|Spirosoma linguale|Spirosoma linguale DSM 74	0	0	0	0	0	0	0	0	0	0	0	0	0	0	0	0	0	0	0	0	0	0
Bacteria|Bacteroidetes|Cytophagia|Cytophagales|Flammeovirgaceae|Marivirga|Marivirga tractuosa|Marivirga tractuosa DSM 4126	0	0	0	0	0	0	0	0	0	0	0	0	0	0	0	0	0	0	0	0	0	0
Bacteria|Bacteroidetes|environmental samples|unidentified eubacterium SCB49	0	0	0	0	0	0	0	0	0	0	0	0	0	0	0	0	0	0	0	0	0	0
Bacteria|Bacteroidetes|Flavobacteriia|Flavobacteriales|Blattabacteriaceae|Blattabacterium|Blattabacterium punctulatus|Blattabacterium sp. (Cryptocercus punctulatus) str. Cpu	0	0	0	0	0	0	0	0	0	0	0	0	0	0	0	0	0	0	0	0	0	0
Bacteria|Bacteroidetes|Flavobacteriia|Flavobacteriales|Blattabacteriaceae|Blattabacterium|Blattabacterium sp. (Blaberus giganteus)	0	0	0	0	0	0	0	0	0	0	0	0	0	0	0	0	0	0	0	0	0	0
Bacteria|Bacteroidetes|Flavobacteriia|Flavobacteriales|Blattabacteriaceae|Blattabacterium|Blattabacterium sp. (Blattella germanica)|Blattabacterium sp. (Blattella germanica) str. Bge	0	0	0	0	0	0	0	0	0	0	0	0	0	0	0	0	0	0	0	0	0	0
Bacteria|Bacteroidetes|Flavobacteriia|Flavobacteriales|Blattabacteriaceae|Blattabacterium|Blattabacterium sp. (Mastotermes darwiniensis)|Blattabacterium sp. (Mastotermes darwiniensis) str. MADAR	0	0	0	0	0	0	0	0	0	0	0	0	0	0	0	0	0	0	0	0	0	0
Bacteria|Bacteroidetes|Flavobacteriia|Flavobacteriales|Blattabacteriaceae|Blattabacterium|Blattabacterium sp. (Periplaneta americana)|Blattabacterium sp. (Periplaneta americana) str. BPLAN	0	0	0	0	0	0	0	0	0	0	0	0	0	0	0	0	0	0	0	0	0	0
Bacteria|Bacteroidetes|Flavobacteriia|Flavobacteriales|Cryomorphaceae|Fluviicola|Fluviicola taffensis|Fluviicola taffensis DSM 16823	0	2	1	3	0	0	0	0	0	0	1	1	0	0	0	0	0	3	0	0	0	0
Bacteria|Bacteroidetes|Flavobacteriia|Flavobacteriales|Cryomorphaceae|Owenweeksia|Owenweeksia hongkongensis|Owenweeksia hongkongensis DSM 17368	0	0	0	0	0	0	0	0	0	0	0	0	0	0	0	0	0	0	0	0	0	0
Bacteria|Bacteroidetes|Flavobacteriia|Flavobacteriales|Flavobacteriaceae|Aequorivita|Aequorivita sublithincola|Aequorivita sublithincola DSM 14238	0	0	0	0	0	0	0	0	0	0	0	0	0	0	0	0	0	0	0	0	0	0
Bacteria|Bacteroidetes|Flavobacteriia|Flavobacteriales|Flavobacteriaceae|Bizionia|Bizionia argentinensis|Bizionia argentinensis JUB59	0	0	0	0	0	0	0	0	0	0	0	0	0	0	0	0	0	0	0	0	0	0
Bacteria|Bacteroidetes|Flavobacteriia|Flavobacteriales|Flavobacteriaceae|Capnocytophaga|Capnocytophaga canimorsus|Capnocytophaga canimorsus Cc5	0	0	0	0	0	0	0	0	0	0	0	0	0	0	0	0	0	0	0	0	0	0
Bacteria|Bacteroidetes|Flavobacteriia|Flavobacteriales|Flavobacteriaceae|Capnocytophaga|Capnocytophaga gingivalis|Capnocytophaga gingivalis ATCC 33624	0	0	0	0	0	0	0	0	0	0	0	0	0	0	0	0	0	0	0	0	0	0
Bacteria|Bacteroidetes|Flavobacteriia|Flavobacteriales|Flavobacteriaceae|Capnocytophaga|Capnocytophaga ochracea|Capnocytophaga ochracea DSM 7271	0	0	0	0	0	0	0	0	0	0	0	0	0	0	0	0	0	0	0	0	0	0
Bacteria|Bacteroidetes|Flavobacteriia|Flavobacteriales|Flavobacteriaceae|Capnocytophaga|Capnocytophaga ochracea|Capnocytophaga ochracea F0287	0	0	0	0	0	0	0	0	0	0	0	0	0	0	0	0	0	0	0	0	0	0
Bacteria|Bacteroidetes|Flavobacteriia|Flavobacteriales|Flavobacteriaceae|Capnocytophaga|Capnocytophaga ochracea|Capnocytophaga ochracea str. Holt 25	0	0	0	0	0	0	0	0	0	0	0	0	0	0	0	0	0	0	0	0	0	0
Bacteria|Bacteroidetes|Flavobacteriia|Flavobacteriales|Flavobacteriaceae|Capnocytophaga|Capnocytophaga sp. CM59	0	0	0	0	0	0	0	0	0	0	0	0	0	0	0	0	0	0	0	0	0	0
Bacteria|Bacteroidetes|Flavobacteriia|Flavobacteriales|Flavobacteriaceae|Capnocytophaga|Capnocytophaga sp. oral taxon 329|Capnocytophaga sp. oral taxon 329 str. F0087	0	0	0	0	0	0	0	0	0	0	0	0	0	0	0	0	0	0	0	0	0	0
Bacteria|Bacteroidetes|Flavobacteriia|Flavobacteriales|Flavobacteriaceae|Capnocytophaga|Capnocytophaga sp. oral taxon 335|Capnocytophaga sp. oral taxon 335 str. F0486	0	0	0	0	0	0	0	0	0	0	0	0	0	0	0	0	0	0	0	0	0	0
Bacteria|Bacteroidetes|Flavobacteriia|Flavobacteriales|Flavobacteriaceae|Capnocytophaga|Capnocytophaga sp. oral taxon 338|Capnocytophaga sp. oral taxon 338 str. F0234	0	0	0	0	0	0	0	0	0	0	0	0	0	0	0	0	0	0	0	0	0	0
Bacteria|Bacteroidetes|Flavobacteriia|Flavobacteriales|Flavobacteriaceae|Capnocytophaga|Capnocytophaga sp. oral taxon 412|Capnocytophaga sp. oral taxon 412 str. F0487	0	0	0	0	0	0	0	0	0	0	0	0	0	0	0	0	0	0	0	0	0	0
Bacteria|Bacteroidetes|Flavobacteriia|Flavobacteriales|Flavobacteriaceae|Capnocytophaga|Capnocytophaga sputigena|Capnocytophaga sputigena ATCC 33612	0	0	0	0	0	0	0	0	0	0	0	0	0	0	0	0	0	0	0	0	0	0
Bacteria|Bacteroidetes|Flavobacteriia|Flavobacteriales|Flavobacteriaceae|Cellulophaga|Cellulophaga algicola|Cellulophaga algicola DSM 14237	0	0	0	0	0	0	0	0	0	0	0	0	0	0	0	0	0	0	0	0	0	0
Bacteria|Bacteroidetes|Flavobacteriia|Flavobacteriales|Flavobacteriaceae|Cellulophaga|Cellulophaga lytica|Cellulophaga lytica DSM 7489	0	0	0	0	0	0	0	0	0	0	0	0	0	0	0	0	0	0	0	0	0	0
Bacteria|Bacteroidetes|Flavobacteriia|Flavobacteriales|Flavobacteriaceae|Chryseobacterium|Chryseobacterium gleum|Chryseobacterium gleum ATCC 35910	6	5	2	5	2	0	0	5	0	0	2	3	0	0	0	0	3	0	0	0	0	2
Bacteria|Bacteroidetes|Flavobacteriia|Flavobacteriales|Flavobacteriaceae|Croceibacter|Croceibacter atlanticus|Croceibacter atlanticus HTCC2559	0	0	0	0	0	0	0	0	0	0	0	0	0	0	0	0	0	0	0	0	0	0
Bacteria|Bacteroidetes|Flavobacteriia|Flavobacteriales|Flavobacteriaceae|Dokdonia|Dokdonia donghaensis|Dokdonia donghaensis MED134	0	0	0	0	0	0	0	0	0	0	0	0	0	0	0	0	0	0	0	0	0	0
Bacteria|Bacteroidetes|Flavobacteriia|Flavobacteriales|Flavobacteriaceae|Elizabethkingia|Elizabethkingia anophelis|Elizabethkingia anophelis Ag1	3	1	0	5	0	0	0	0	1	0	1	0	0	0	0	0	1	0	0	0	0	0
Bacteria|Bacteroidetes|Flavobacteriia|Flavobacteriales|Flavobacteriaceae|Flavobacterium|Flavobacterium branchiophilum|Flavobacterium branchiophilum FL-15	0	0	0	0	0	0	0	0	0	0	0	0	0	0	0	0	0	0	0	0	0	0
Bacteria|Bacteroidetes|Flavobacteriia|Flavobacteriales|Flavobacteriaceae|Flavobacterium|Flavobacterium columnare|Flavobacterium columnare ATCC 49512	0	0	0	0	0	0	0	0	0	1	0	0	0	0	0	0	0	0	0	0	0	0
Bacteria|Bacteroidetes|Flavobacteriia|Flavobacteriales|Flavobacteriaceae|Flavobacterium|Flavobacterium frigoris|Flavobacterium frigoris PS1	0	0	0	0	0	0	0	0	0	0	0	0	0	0	0	0	0	0	0	0	0	0
Bacteria|Bacteroidetes|Flavobacteriia|Flavobacteriales|Flavobacteriaceae|Flavobacterium|Flavobacterium indicum|Flavobacterium indicum GPTSA100-9 = DSM 17447	0	0	0	0	0	0	0	0	0	0	0	0	0	0	0	0	0	0	0	0	0	0
Bacteria|Bacteroidetes|Flavobacteriia|Flavobacteriales|Flavobacteriaceae|Flavobacterium|Flavobacterium johnsoniae|Flavobacterium johnsoniae UW101	0	0	0	0	0	0	1	0	0	0	0	0	0	0	0	0	0	1	0	0	0	0
Bacteria|Bacteroidetes|Flavobacteriia|Flavobacteriales|Flavobacteriaceae|Flavobacterium|Flavobacterium psychrophilum|Flavobacterium psychrophilum JIP02/86	0	0	0	0	0	0	0	0	0	0	0	0	0	0	0	0	0	0	0	0	0	0
Bacteria|Bacteroidetes|Flavobacteriia|Flavobacteriales|Flavobacteriaceae|Gillisia|Gillisia limnaea|Gillisia limnaea DSM 15749	0	0	0	0	0	0	0	0	0	0	0	0	0	0	0	0	0	0	0	0	0	0
Bacteria|Bacteroidetes|Flavobacteriia|Flavobacteriales|Flavobacteriaceae|Gramella|Gramella forsetii|Gramella forsetii KT0803	0	0	0	0	0	0	0	0	0	0	0	0	0	0	0	0	0	0	0	0	0	0
Bacteria|Bacteroidetes|Flavobacteriia|Flavobacteriales|Flavobacteriaceae|Imtechella|Imtechella halotolerans|Imtechella halotolerans K1	0	0	0	0	0	0	0	0	0	0	0	0	0	0	0	0	0	0	0	0	0	0
Bacteria|Bacteroidetes|Flavobacteriia|Flavobacteriales|Flavobacteriaceae|Joostella|Joostella marina|Joostella marina DSM 19592	0	0	0	0	0	0	0	0	0	0	0	0	0	0	0	0	0	0	0	0	0	0
Bacteria|Bacteroidetes|Flavobacteriia|Flavobacteriales|Flavobacteriaceae|Kordia|Kordia algicida|Kordia algicida OT-1	0	0	0	0	0	0	0	0	0	0	0	0	0	0	0	0	0	0	0	0	0	0
Bacteria|Bacteroidetes|Flavobacteriia|Flavobacteriales|Flavobacteriaceae|Krokinobacter|Krokinobacter sp. 4H-3-7-5	0	0	0	0	0	0	0	0	0	0	0	0	0	0	0	0	0	0	0	0	0	0
Bacteria|Bacteroidetes|Flavobacteriia|Flavobacteriales|Flavobacteriaceae|Lacinutrix|Lacinutrix sp. 5H-3-7-4	0	0	0	0	0	0	0	0	0	0	0	0	0	0	0	0	0	0	0	0	0	0
Bacteria|Bacteroidetes|Flavobacteriia|Flavobacteriales|Flavobacteriaceae|Leeuwenhoekiella|Leeuwenhoekiella blandensis|Leeuwenhoekiella blandensis MED217	0	0	0	0	0	0	0	0	0	0	0	0	0	0	0	0	0	0	0	0	0	0
Bacteria|Bacteroidetes|Flavobacteriia|Flavobacteriales|Flavobacteriaceae|Maribacter|Maribacter sp. HTCC2170	0	0	0	0	0	0	0	0	0	0	0	0	0	0	0	0	0	0	0	0	0	0
Bacteria|Bacteroidetes|Flavobacteriia|Flavobacteriales|Flavobacteriaceae|Mesoflavibacter|Mesoflavibacter zeaxanthinifaciens|Mesoflavibacter zeaxanthinifaciens S86	0	0	0	0	0	0	0	0	0	0	0	0	0	0	0	0	0	0	0	0	0	0
Bacteria|Bacteroidetes|Flavobacteriia|Flavobacteriales|Flavobacteriaceae|Muricauda|Muricauda ruestringensis|Muricauda ruestringensis DSM 13258	0	0	0	0	0	0	0	0	0	0	0	0	0	0	0	0	0	0	0	0	0	0
Bacteria|Bacteroidetes|Flavobacteriia|Flavobacteriales|Flavobacteriaceae|Myroides|Myroides odoratimimus|Myroides odoratimimus CCUG 10230	0	0	3	0	0	0	0	0	0	0	0	0	0	0	0	0	0	0	0	0	0	0
Bacteria|Bacteroidetes|Flavobacteriia|Flavobacteriales|Flavobacteriaceae|Myroides|Myroides odoratimimus|Myroides odoratimimus CCUG 12901	0	0	0	0	0	0	0	0	0	0	0	0	0	0	0	0	0	0	0	0	0	0
Bacteria|Bacteroidetes|Flavobacteriia|Flavobacteriales|Flavobacteriaceae|Myroides|Myroides odoratimimus|Myroides odoratimimus CIP 101113	1	0	0	1	0	0	0	0	0	0	0	0	1	0	0	0	0	0	0	0	0	0
Bacteria|Bacteroidetes|Flavobacteriia|Flavobacteriales|Flavobacteriaceae|Myroides|Myroides odoratus|Myroides odoratus DSM 2801	0	0	2	0	2	6	1	0	1	0	0	0	6	0	0	0	0	3	0	0	0	0
Bacteria|Bacteroidetes|Flavobacteriia|Flavobacteriales|Flavobacteriaceae|Ornithobacterium|Ornithobacterium rhinotracheale|Ornithobacterium rhinotracheale DSM 15997	0	0	0	0	0	0	0	0	0	0	0	0	0	0	0	0	0	0	0	0	0	0
Bacteria|Bacteroidetes|Flavobacteriia|Flavobacteriales|Flavobacteriaceae|Polaribacter|Polaribacter irgensii|Polaribacter irgensii 23-P	0	0	0	0	0	0	0	0	0	0	0	0	0	0	0	0	0	0	0	0	0	0
Bacteria|Bacteroidetes|Flavobacteriia|Flavobacteriales|Flavobacteriaceae|Polaribacter|Polaribacter sp. MED152	0	0	0	0	0	0	0	0	0	0	0	0	0	0	0	0	0	0	0	0	0	0
Bacteria|Bacteroidetes|Flavobacteriia|Flavobacteriales|Flavobacteriaceae|Psychroflexus|Psychroflexus torquis|Psychroflexus torquis ATCC 700755	0	0	0	0	0	0	0	0	0	0	0	0	0	0	0	0	0	0	0	0	0	0
Bacteria|Bacteroidetes|Flavobacteriia|Flavobacteriales|Flavobacteriaceae|Riemerella|Riemerella anatipestifer|Riemerella anatipestifer ATCC 11845 = DSM 15868	0	0	0	0	0	0	0	0	0	0	0	0	0	0	0	0	0	0	0	0	0	0
Bacteria|Bacteroidetes|Flavobacteriia|Flavobacteriales|Flavobacteriaceae|Riemerella|Riemerella anatipestifer|Riemerella anatipestifer RA-GD	0	0	0	0	0	0	0	0	0	0	0	0	0	0	0	0	0	0	0	0	0	0
Bacteria|Bacteroidetes|Flavobacteriia|Flavobacteriales|Flavobacteriaceae|Robiginitalea|Robiginitalea biformata|Robiginitalea biformata HTCC2501	0	0	0	0	0	0	0	0	0	0	0	0	0	0	0	0	0	0	0	0	0	0
Bacteria|Bacteroidetes|Flavobacteriia|Flavobacteriales|Flavobacteriaceae|unclassified Flavobacteriaceae|Flavobacteriaceae bacterium 3519-10	0	0	0	0	0	0	0	0	0	0	0	0	0	0	0	0	0	0	0	0	0	0
Bacteria|Bacteroidetes|Flavobacteriia|Flavobacteriales|Flavobacteriaceae|unclassified Flavobacteriaceae|Flavobacteriaceae bacterium HQM9	0	0	0	0	0	0	0	0	0	0	0	0	0	0	0	0	0	0	0	0	0	0
Bacteria|Bacteroidetes|Flavobacteriia|Flavobacteriales|Flavobacteriaceae|unclassified Flavobacteriaceae|Flavobacteriaceae bacterium S85	0	0	0	0	0	0	0	0	0	0	0	0	0	0	0	0	0	0	0	0	0	0
Bacteria|Bacteroidetes|Flavobacteriia|Flavobacteriales|Flavobacteriaceae|Weeksella|Weeksella virosa|Weeksella virosa DSM 16922	2	4	0	0	0	0	0	0	0	0	0	0	0	0	0	0	3	0	0	0	0	0
Bacteria|Bacteroidetes|Flavobacteriia|Flavobacteriales|Flavobacteriaceae|Zobellia|Zobellia galactanivorans	0	0	0	0	0	0	0	0	0	0	0	0	0	0	0	0	0	0	0	0	0	0
Bacteria|Bacteroidetes|Flavobacteriia|Flavobacteriales|Flavobacteriaceae|Zunongwangia|Zunongwangia profunda|Zunongwangia profunda SM-A87	0	0	0	0	0	0	0	0	0	0	0	0	0	0	0	0	0	0	0	0	0	0
Bacteria|Bacteroidetes|Flavobacteriia|Flavobacteriales|unclassified Flavobacteriales|Candidatus Sulcia|Candidatus Sulcia muelleri|Candidatus Sulcia muelleri CARI	0	0	0	0	0	0	0	0	0	0	0	0	0	0	0	0	0	0	0	0	0	0
Bacteria|Bacteroidetes|Flavobacteriia|Flavobacteriales|unclassified Flavobacteriales|Candidatus Sulcia|Candidatus Sulcia muelleri|Candidatus Sulcia muelleri DMIN	0	0	0	0	0	0	0	0	0	0	0	0	0	0	0	0	0	0	0	0	0	0
Bacteria|Bacteroidetes|Flavobacteriia|Flavobacteriales|unclassified Flavobacteriales|Candidatus Sulcia|Candidatus Sulcia muelleri|Candidatus Sulcia muelleri GWSS	0	0	0	0	0	0	0	0	0	0	0	0	0	0	0	0	0	0	0	0	0	0
Bacteria|Bacteroidetes|Flavobacteriia|Flavobacteriales|unclassified Flavobacteriales|Candidatus Sulcia|Candidatus Sulcia muelleri|Candidatus Sulcia muelleri SMDSEM	0	0	0	0	0	0	0	0	0	0	0	0	0	0	0	0	0	0	0	0	0	0
Bacteria|Bacteroidetes|Flavobacteriia|Flavobacteriales|unclassified Flavobacteriales|Candidatus Sulcia|Candidatus Sulcia muelleri|Candidatus Sulcia muelleri str. Hc (Homalodisca coagulata)	0	0	0	0	0	0	0	0	0	0	0	0	0	0	0	0	0	0	0	0	0	0
Bacteria|Bacteroidetes|Flavobacteriia|Flavobacteriales|unclassified Flavobacteriales|unclassified Flavobacteriales (miscellaneous)|Flavobacteria bacterium BAL38	10	0	0	4	1	10	0	7	0	2	1	5	2	2	0	3	1	1	0	1	1	0
Bacteria|Bacteroidetes|Flavobacteriia|Flavobacteriales|unclassified Flavobacteriales|unclassified Flavobacteriales (miscellaneous)|Flavobacteriales bacterium ALC-1	0	0	0	0	0	0	0	0	0	0	0	0	0	0	0	0	0	0	0	0	0	0
Bacteria|Bacteroidetes|Flavobacteriia|unclassified Flavobacteriia|Flavobacteria bacterium BBFL7	0	0	0	0	0	0	0	0	0	0	0	0	0	0	0	0	0	0	0	0	0	0
Bacteria|Bacteroidetes|Flavobacteriia|unclassified Flavobacteriia|Flavobacteria bacterium MS024-2A	0	0	0	0	0	0	0	0	0	0	0	0	0	0	0	0	0	0	0	0	0	0
Bacteria|Bacteroidetes|Flavobacteriia|unclassified Flavobacteriia|Flavobacteria bacterium MS024-3C	0	0	0	0	0	0	0	0	0	0	0	0	0	0	0	0	0	0	0	0	0	0
Bacteria|Bacteroidetes|Sphingobacteriia|Sphingobacteriales|Chitinophagaceae|Chitinophaga|Chitinophaga pinensis|Chitinophaga pinensis DSM 2588	0	0	0	0	0	0	0	0	0	0	0	0	0	0	0	0	0	0	1	0	0	0
Bacteria|Bacteroidetes|Sphingobacteriia|Sphingobacteriales|Chitinophagaceae|Niabella|Niabella soli|Niabella soli DSM 19437	0	0	0	0	0	0	0	0	0	0	0	1	0	0	0	0	0	0	0	0	0	0
Bacteria|Bacteroidetes|Sphingobacteriia|Sphingobacteriales|Chitinophagaceae|Niastella|Niastella koreensis|Niastella koreensis GR20-10	0	0	0	0	0	0	0	0	0	0	0	0	0	0	0	0	0	0	0	0	0	0
Bacteria|Bacteroidetes|Sphingobacteriia|Sphingobacteriales|Saprospiraceae|Haliscomenobacter|Haliscomenobacter hydrossis|Haliscomenobacter hydrossis DSM 1100	0	0	0	0	1	0	0	0	0	1	0	1	0	0	0	0	1	0	0	0	0	0
Bacteria|Bacteroidetes|Sphingobacteriia|Sphingobacteriales|Saprospiraceae|Saprospira|Saprospira grandis|Saprospira grandis str. Lewin	0	0	0	0	0	0	0	0	0	0	0	0	0	0	0	0	0	0	0	0	0	0
Bacteria|Bacteroidetes|Sphingobacteriia|Sphingobacteriales|Sphingobacteriaceae|Mucilaginibacter|Mucilaginibacter paludis|Mucilaginibacter paludis DSM 18603	0	0	0	0	0	0	0	0	0	0	0	0	0	0	0	0	0	0	0	0	0	0
Bacteria|Bacteroidetes|Sphingobacteriia|Sphingobacteriales|Sphingobacteriaceae|Pedobacter|Pedobacter heparinus|Pedobacter heparinus DSM 2366	0	0	0	0	0	0	0	0	0	0	0	0	0	0	0	0	0	0	0	0	0	0
Bacteria|Bacteroidetes|Sphingobacteriia|Sphingobacteriales|Sphingobacteriaceae|Pedobacter|Pedobacter saltans|Pedobacter saltans DSM 12145	0	0	0	0	1	0	0	0	0	0	0	0	0	0	0	0	0	0	0	0	0	0
Bacteria|Bacteroidetes|Sphingobacteriia|Sphingobacteriales|Sphingobacteriaceae|Pedobacter|Pedobacter sp. BAL39	0	0	0	0	0	0	0	0	0	0	0	0	0	0	0	0	0	0	0	0	0	0
Bacteria|Bacteroidetes|Sphingobacteriia|Sphingobacteriales|Sphingobacteriaceae|Solitalea|Solitalea canadensis|Solitalea canadensis DSM 3403	0	0	0	0	0	0	0	0	0	0	0	0	0	0	0	0	0	0	0	0	0	0
Bacteria|Bacteroidetes|Sphingobacteriia|Sphingobacteriales|Sphingobacteriaceae|Sphingobacterium|Sphingobacterium sp. 21	1	1	2	1	1	0	0	0	0	0	1	0	0	0	0	0	0	0	0	0	0	0
Bacteria|Bacteroidetes|Sphingobacteriia|Sphingobacteriales|Sphingobacteriaceae|Sphingobacterium|Sphingobacterium spiritivorum|Sphingobacterium spiritivorum ATCC 33300	1	1	2	2	0	0	0	3	0	1	1	0	0	1	0	0	0	1	0	0	0	0
Bacteria|Bacteroidetes|Sphingobacteriia|Sphingobacteriales|Sphingobacteriaceae|Sphingobacterium|Sphingobacterium spiritivorum|Sphingobacterium spiritivorum ATCC 33861	0	0	0	0	0	0	0	0	0	0	0	0	0	0	0	0	0	0	0	0	0	0
Bacteria|Bacteroidetes|unclassified Bacteroidetes|unclassified Bacteroidetes (miscellaneous)|Bacteroidetes oral taxon 274|Bacteroidetes oral taxon 274 str. F0058	0	0	0	0	0	0	0	0	0	0	0	0	0	0	0	0	0	0	0	0	0	0
Bacteria|Caldiserica|Caldisericia|Caldisericales|Caldisericaceae|Caldisericum|Caldisericum exile|Caldisericum exile AZM16c01	0	0	0	0	0	0	0	0	0	0	0	0	0	0	0	0	0	0	0	0	0	0
Bacteria|Chlamydiae|Chlamydiia|Chlamydiales|Chlamydiaceae|Chlamydia/Chlamydophila group|Chlamydia|Chlamydia muridarum|Chlamydia muridarum MopnTet14	0	0	0	0	0	0	0	0	0	0	0	0	0	0	0	0	0	0	0	0	0	0
Bacteria|Chlamydiae|Chlamydiia|Chlamydiales|Chlamydiaceae|Chlamydia/Chlamydophila group|Chlamydia|Chlamydia muridarum|Chlamydia muridarum str. Nigg	0	0	0	0	0	0	0	0	0	0	0	0	0	0	0	0	0	0	0	0	0	0
Bacteria|Chlamydiae|Chlamydiia|Chlamydiales|Chlamydiaceae|Chlamydia/Chlamydophila group|Chlamydia|Chlamydia muridarum|Chlamydia muridarum str. Weiss	0	0	0	0	0	0	0	0	0	0	0	0	0	0	0	0	0	0	0	0	0	0
Bacteria|Chlamydiae|Chlamydiia|Chlamydiales|Chlamydiaceae|Chlamydia/Chlamydophila group|Chlamydia|Chlamydia pecorum|Chlamydophila pecorum E58	0	0	0	0	0	0	0	0	0	0	0	0	0	0	0	0	0	0	0	0	0	0
Bacteria|Chlamydiae|Chlamydiia|Chlamydiales|Chlamydiaceae|Chlamydia/Chlamydophila group|Chlamydia|Chlamydia pneumoniae|Chlamydophila pneumoniae AR39	0	0	0	0	0	0	0	0	0	0	0	0	0	0	0	0	0	0	0	0	0	0
Bacteria|Chlamydiae|Chlamydiia|Chlamydiales|Chlamydiaceae|Chlamydia/Chlamydophila group|Chlamydia|Chlamydia pneumoniae|Chlamydophila pneumoniae CWL029	0	0	0	0	0	0	0	0	0	0	0	0	0	0	0	0	0	0	0	0	0	0
Bacteria|Chlamydiae|Chlamydiia|Chlamydiales|Chlamydiaceae|Chlamydia/Chlamydophila group|Chlamydia|Chlamydia pneumoniae|Chlamydophila pneumoniae J138	0	0	0	0	0	0	0	0	0	0	0	0	0	0	0	0	0	0	0	0	0	0
Bacteria|Chlamydiae|Chlamydiia|Chlamydiales|Chlamydiaceae|Chlamydia/Chlamydophila group|Chlamydia|Chlamydia pneumoniae|Chlamydophila pneumoniae LPCoLN	0	0	0	0	0	0	0	0	0	0	0	0	0	0	0	0	0	0	0	0	0	0
Bacteria|Chlamydiae|Chlamydiia|Chlamydiales|Chlamydiaceae|Chlamydia/Chlamydophila group|Chlamydia|Chlamydia pneumoniae|Chlamydophila pneumoniae TW-183	0	0	0	0	0	0	0	0	0	0	0	0	0	0	0	0	0	0	0	0	0	0
Bacteria|Chlamydiae|Chlamydiia|Chlamydiales|Chlamydiaceae|Chlamydia/Chlamydophila group|Chlamydia|Chlamydia psittaci|Chlamydia psittaci 01DC11	0	0	0	0	0	0	0	0	0	0	0	0	0	0	0	0	0	0	0	0	0	0
Bacteria|Chlamydiae|Chlamydiia|Chlamydiales|Chlamydiaceae|Chlamydia/Chlamydophila group|Chlamydia|Chlamydia psittaci|Chlamydia psittaci 02DC15	0	0	0	0	0	0	0	0	0	0	0	0	0	0	0	0	0	0	0	0	0	0
Bacteria|Chlamydiae|Chlamydiia|Chlamydiales|Chlamydiaceae|Chlamydia/Chlamydophila group|Chlamydia|Chlamydia psittaci|Chlamydia psittaci 08DC60	0	0	0	0	0	0	0	0	0	0	0	0	0	0	0	0	0	0	0	0	0	0
Bacteria|Chlamydiae|Chlamydiia|Chlamydiales|Chlamydiaceae|Chlamydia/Chlamydophila group|Chlamydia|Chlamydia psittaci|Chlamydia psittaci 6BC	0	0	0	0	0	0	0	0	0	0	0	0	0	0	0	0	0	0	0	0	0	0
Bacteria|Chlamydiae|Chlamydiia|Chlamydiales|Chlamydiaceae|Chlamydia/Chlamydophila group|Chlamydia|Chlamydia psittaci|Chlamydia psittaci C19/98	0	0	0	0	0	0	0	0	0	0	0	0	0	0	0	0	0	0	0	0	0	0
Bacteria|Chlamydiae|Chlamydiia|Chlamydiales|Chlamydiaceae|Chlamydia/Chlamydophila group|Chlamydia|Chlamydia psittaci|Chlamydia psittaci Cal10	0	0	0	0	0	0	0	0	0	0	0	0	0	0	0	0	0	0	0	0	0	0
Bacteria|Chlamydiae|Chlamydiia|Chlamydiales|Chlamydiaceae|Chlamydia/Chlamydophila group|Chlamydia|Chlamydia psittaci|Chlamydia psittaci RD1	0	0	0	0	0	0	0	0	0	0	0	0	0	0	0	0	0	0	0	0	0	0
Bacteria|Chlamydiae|Chlamydiia|Chlamydiales|Chlamydiaceae|Chlamydia/Chlamydophila group|Chlamydia|Chlamydia trachomatis|Chlamydia trachomatis 434/Bu	0	0	0	0	0	0	0	0	0	0	0	0	0	0	0	0	0	0	0	0	0	0
Bacteria|Chlamydiae|Chlamydiia|Chlamydiales|Chlamydiaceae|Chlamydia/Chlamydophila group|Chlamydia|Chlamydia trachomatis|Chlamydia trachomatis 6276	0	0	0	0	0	0	0	0	0	0	0	0	0	0	0	0	0	0	0	0	0	0
Bacteria|Chlamydiae|Chlamydiia|Chlamydiales|Chlamydiaceae|Chlamydia/Chlamydophila group|Chlamydia|Chlamydia trachomatis|Chlamydia trachomatis 6276s	0	0	0	0	0	0	0	0	0	0	0	0	0	0	0	0	0	0	0	0	0	0
Bacteria|Chlamydiae|Chlamydiia|Chlamydiales|Chlamydiaceae|Chlamydia/Chlamydophila group|Chlamydia|Chlamydia trachomatis|Chlamydia trachomatis 70	0	0	0	0	0	0	0	0	0	0	0	0	0	0	0	0	0	0	0	0	0	0
Bacteria|Chlamydiae|Chlamydiia|Chlamydiales|Chlamydiaceae|Chlamydia/Chlamydophila group|Chlamydia|Chlamydia trachomatis|Chlamydia trachomatis 70s	0	0	0	0	0	0	0	0	0	0	0	0	0	0	0	0	0	0	0	0	0	0
Bacteria|Chlamydiae|Chlamydiia|Chlamydiales|Chlamydiaceae|Chlamydia/Chlamydophila group|Chlamydia|Chlamydia trachomatis|Chlamydia trachomatis A/HAR-13	0	0	0	0	0	0	0	0	0	0	0	0	0	0	0	0	0	0	0	0	0	0
Bacteria|Chlamydiae|Chlamydiia|Chlamydiales|Chlamydiaceae|Chlamydia/Chlamydophila group|Chlamydia|Chlamydia trachomatis|Chlamydia trachomatis A2497	0	0	0	0	0	0	0	0	0	0	0	0	0	0	0	0	0	0	0	0	0	0
Bacteria|Chlamydiae|Chlamydiia|Chlamydiales|Chlamydiaceae|Chlamydia/Chlamydophila group|Chlamydia|Chlamydia trachomatis|Chlamydia trachomatis B/Jali20/OT	0	0	0	0	0	0	0	0	0	0	0	0	0	0	0	0	0	0	0	0	0	0
Bacteria|Chlamydiae|Chlamydiia|Chlamydiales|Chlamydiaceae|Chlamydia/Chlamydophila group|Chlamydia|Chlamydia trachomatis|Chlamydia trachomatis B/TZ1A828/OT	0	0	0	0	0	0	0	0	0	0	0	0	0	0	0	0	0	0	0	0	0	0
Bacteria|Chlamydiae|Chlamydiia|Chlamydiales|Chlamydiaceae|Chlamydia/Chlamydophila group|Chlamydia|Chlamydia trachomatis|Chlamydia trachomatis D(s)2923	0	0	0	0	0	0	0	0	0	0	0	0	0	0	0	0	0	0	0	0	0	0
Bacteria|Chlamydiae|Chlamydiia|Chlamydiales|Chlamydiaceae|Chlamydia/Chlamydophila group|Chlamydia|Chlamydia trachomatis|Chlamydia trachomatis D/UW-3/CX	0	0	0	0	0	0	0	0	0	0	0	0	0	0	0	0	0	0	0	0	0	0
Bacteria|Chlamydiae|Chlamydiia|Chlamydiales|Chlamydiaceae|Chlamydia/Chlamydophila group|Chlamydia|Chlamydia trachomatis|Chlamydia trachomatis D-EC	0	0	0	0	0	0	0	0	0	0	0	0	0	0	0	0	0	0	0	0	0	0
Bacteria|Chlamydiae|Chlamydiia|Chlamydiales|Chlamydiaceae|Chlamydia/Chlamydophila group|Chlamydia|Chlamydia trachomatis|Chlamydia trachomatis D-LC	0	0	0	0	0	0	0	0	0	0	0	0	0	0	0	0	0	0	0	0	0	0
Bacteria|Chlamydiae|Chlamydiia|Chlamydiales|Chlamydiaceae|Chlamydia/Chlamydophila group|Chlamydia|Chlamydia trachomatis|Chlamydia trachomatis E/11023	0	0	0	0	0	0	0	0	0	0	0	0	0	0	0	0	0	0	0	0	0	0
Bacteria|Chlamydiae|Chlamydiia|Chlamydiales|Chlamydiaceae|Chlamydia/Chlamydophila group|Chlamydia|Chlamydia trachomatis|Chlamydia trachomatis E/150	0	0	0	0	0	0	0	0	0	0	0	0	0	0	0	0	0	0	0	0	0	0
Bacteria|Chlamydiae|Chlamydiia|Chlamydiales|Chlamydiaceae|Chlamydia/Chlamydophila group|Chlamydia|Chlamydia trachomatis|Chlamydia trachomatis E/SW3	0	0	0	0	0	0	0	0	0	0	0	0	0	0	0	0	0	0	0	0	0	0
Bacteria|Chlamydiae|Chlamydiia|Chlamydiales|Chlamydiaceae|Chlamydia/Chlamydophila group|Chlamydia|Chlamydia trachomatis|Chlamydia trachomatis F/SW4	0	0	0	0	0	0	0	0	0	0	0	0	0	0	0	0	0	0	0	0	0	0
Bacteria|Chlamydiae|Chlamydiia|Chlamydiales|Chlamydiaceae|Chlamydia/Chlamydophila group|Chlamydia|Chlamydia trachomatis|Chlamydia trachomatis F/SW5	0	0	0	0	0	0	0	0	0	0	0	0	0	0	0	0	0	0	0	0	0	0
Bacteria|Chlamydiae|Chlamydiia|Chlamydiales|Chlamydiaceae|Chlamydia/Chlamydophila group|Chlamydia|Chlamydia trachomatis|Chlamydia trachomatis G/11074	0	0	0	0	0	0	0	0	0	0	0	0	0	0	0	0	0	0	0	0	0	0
Bacteria|Chlamydiae|Chlamydiia|Chlamydiales|Chlamydiaceae|Chlamydia/Chlamydophila group|Chlamydia|Chlamydia trachomatis|Chlamydia trachomatis G/11222	0	0	0	0	0	0	0	0	0	0	0	0	0	0	0	0	0	0	0	0	0	0
Bacteria|Chlamydiae|Chlamydiia|Chlamydiales|Chlamydiaceae|Chlamydia/Chlamydophila group|Chlamydia|Chlamydia trachomatis|Chlamydia trachomatis G/9301	0	0	0	0	0	0	0	0	0	0	0	0	0	0	0	0	0	0	0	0	0	0
Bacteria|Chlamydiae|Chlamydiia|Chlamydiales|Chlamydiaceae|Chlamydia/Chlamydophila group|Chlamydia|Chlamydia trachomatis|Chlamydia trachomatis G/9768	0	0	0	0	0	0	0	0	0	0	0	0	0	0	0	0	0	0	0	0	0	0
Bacteria|Chlamydiae|Chlamydiia|Chlamydiales|Chlamydiaceae|Chlamydia/Chlamydophila group|Chlamydia|Chlamydia trachomatis|Chlamydia trachomatis L2b/UCH-1/proctitis	0	0	0	0	0	0	0	0	0	0	0	0	0	0	0	0	0	0	0	0	0	0
Bacteria|Chlamydiae|Chlamydiia|Chlamydiales|Chlamydiaceae|Chlamydia/Chlamydophila group|Chlamydia|Chlamydia trachomatis|Chlamydia trachomatis L2c	0	0	0	0	0	0	0	0	0	0	0	0	0	0	0	0	0	0	0	0	0	0
Bacteria|Chlamydiae|Chlamydiia|Chlamydiales|Chlamydiaceae|Chlamydia/Chlamydophila group|Chlamydia|Chlamydia trachomatis|Chlamydia trachomatis L2tet1	0	0	0	0	0	0	0	0	0	0	0	0	0	0	0	0	0	0	0	0	0	0
Bacteria|Chlamydiae|Chlamydiia|Chlamydiales|Chlamydiaceae|Chlamydia/Chlamydophila group|Chlamydia|Chlamydia trachomatis|Chlamydia trachomatis Sweden2	0	0	0	0	0	0	0	0	0	0	0	0	0	0	0	0	0	0	0	0	0	0
Bacteria|Chlamydiae|Chlamydiia|Chlamydiales|Chlamydiaceae|Chlamydia/Chlamydophila group|Chlamydophila|Chlamydophila abortus|Chlamydophila abortus S26/3	0	0	0	0	0	0	0	0	0	0	0	0	0	0	0	0	0	0	0	0	0	0
Bacteria|Chlamydiae|Chlamydiia|Chlamydiales|Chlamydiaceae|Chlamydia/Chlamydophila group|Chlamydophila|Chlamydophila caviae|Chlamydophila caviae GPIC	0	0	0	0	0	0	0	0	0	0	0	0	0	0	0	0	0	0	0	0	0	0
Bacteria|Chlamydiae|Chlamydiia|Chlamydiales|Chlamydiaceae|Chlamydia/Chlamydophila group|Chlamydophila|Chlamydophila felis|Chlamydophila felis Fe/C-56	0	0	0	0	0	0	0	0	0	0	0	0	0	0	0	0	0	0	0	0	0	0
Bacteria|Chlamydiae|Chlamydiia|Chlamydiales|Parachlamydiaceae|Candidatus Protochlamydia|Candidatus Protochlamydia amoebophila|Candidatus Protochlamydia amoebophila UWE25	0	0	0	0	0	0	0	0	0	0	0	0	0	0	0	0	0	0	0	0	0	0
Bacteria|Chlamydiae|Chlamydiia|Chlamydiales|Parachlamydiaceae|Parachlamydia|Parachlamydia acanthamoebae|Parachlamydia acanthamoebae str. Hall's coccus	0	0	0	0	0	0	0	0	0	0	0	0	0	0	0	0	0	0	0	0	0	0
Bacteria|Chlamydiae|Chlamydiia|Chlamydiales|Parachlamydiaceae|Parachlamydia|Parachlamydia acanthamoebae|Parachlamydia acanthamoebae UV-7	0	0	0	1	0	0	0	0	0	0	0	0	0	0	0	0	0	0	0	0	0	2
Bacteria|Chlamydiae|Chlamydiia|Chlamydiales|Simkaniaceae|Simkania|Simkania negevensis|Simkania negevensis Z	0	0	0	0	0	0	0	0	0	0	0	0	0	0	0	0	0	0	0	0	0	0
Bacteria|Chlamydiae|Chlamydiia|Chlamydiales|Waddliaceae|Waddlia|Waddlia chondrophila|Waddlia chondrophila WSU 86-1044	1	0	0	0	0	0	0	0	0	0	0	0	0	0	0	0	0	0	0	0	0	0
Bacteria|Chlorobi|Chlorobia|Chlorobiales|Chlorobiaceae|Chlorobaculum|Chlorobaculum parvum|Chlorobaculum parvum NCIB 8327	0	0	0	0	0	0	0	0	0	0	0	0	0	0	0	0	0	0	0	0	0	0
Bacteria|Chlorobi|Chlorobia|Chlorobiales|Chlorobiaceae|Chlorobaculum|Chlorobaculum tepidum|Chlorobium tepidum TLS	0	0	0	0	0	0	4	0	1	0	0	2	0	0	0	0	0	0	0	0	0	0
Bacteria|Chlorobi|Chlorobia|Chlorobiales|Chlorobiaceae|Chlorobium/Pelodictyon group|Chlorobium|Chlorobium chlorochromatii|Chlorobium chlorochromatii CaD3	0	0	0	0	0	0	21	0	1	0	0	0	4	0	0	0	0	0	0	0	0	0
Bacteria|Chlorobi|Chlorobia|Chlorobiales|Chlorobiaceae|Chlorobium/Pelodictyon group|Chlorobium|Chlorobium ferrooxidans|Chlorobium ferrooxidans DSM 13031	0	0	0	0	0	0	0	0	0	0	0	0	38	0	0	0	0	0	0	0	0	0
Bacteria|Chlorobi|Chlorobia|Chlorobiales|Chlorobiaceae|Chlorobium/Pelodictyon group|Chlorobium|Chlorobium limicola|Chlorobium limicola DSM 245	0	0	1	0	0	0	0	0	0	0	0	0	1	0	0	0	0	0	0	0	0	0
Bacteria|Chlorobi|Chlorobia|Chlorobiales|Chlorobiaceae|Chlorobium/Pelodictyon group|Chlorobium|Chlorobium phaeobacteroides|Chlorobium phaeobacteroides BS1	0	0	0	0	0	0	0	0	0	0	0	0	0	0	0	0	0	0	0	0	0	0
Bacteria|Chlorobi|Chlorobia|Chlorobiales|Chlorobiaceae|Chlorobium/Pelodictyon group|Chlorobium|Chlorobium phaeobacteroides|Chlorobium phaeobacteroides DSM 266	0	0	0	0	0	0	0	0	0	0	0	0	3	0	0	0	0	0	0	0	0	0
Bacteria|Chlorobi|Chlorobia|Chlorobiales|Chlorobiaceae|Chlorobium/Pelodictyon group|Chlorobium|Chlorobium phaeovibrioides|Chlorobium phaeovibrioides DSM 265	0	0	0	0	0	0	0	0	0	0	0	0	0	0	0	0	0	0	0	0	0	0
Bacteria|Chlorobi|Chlorobia|Chlorobiales|Chlorobiaceae|Chlorobium/Pelodictyon group|Pelodictyon|Pelodictyon luteolum|Chlorobium luteolum DSM 273	0	0	0	0	0	0	0	0	0	0	0	0	0	0	0	0	0	0	0	0	0	0
Bacteria|Chlorobi|Chlorobia|Chlorobiales|Chlorobiaceae|Chlorobium/Pelodictyon group|Pelodictyon|Pelodictyon phaeoclathratiforme|Pelodictyon phaeoclathratiforme BU-1	0	0	0	0	0	0	0	0	0	0	0	0	0	0	0	0	0	0	0	0	0	0
Bacteria|Chlorobi|Chlorobia|Chlorobiales|Chlorobiaceae|Chloroherpeton|Chloroherpeton thalassium|Chloroherpeton thalassium ATCC 35110	0	0	0	0	0	0	0	0	0	0	0	0	0	0	0	0	0	0	0	0	0	0
Bacteria|Chlorobi|Chlorobia|Chlorobiales|Chlorobiaceae|Prosthecochloris|Prosthecochloris aestuarii|Prosthecochloris aestuarii DSM 271	0	0	0	0	0	0	0	0	0	0	0	0	0	0	0	0	0	0	0	0	0	0
Bacteria|Chloroflexi|Anaerolineae|Anaerolineales|Anaerolineaceae|Anaerolinea|Anaerolinea thermophila|Anaerolinea thermophila UNI-1	0	0	0	0	0	0	0	0	0	0	0	0	0	0	0	0	0	0	0	0	0	0
Bacteria|Chloroflexi|Caldilineae|Caldilineales|Caldilineaceae|Caldilinea|Caldilinea aerophila|Caldilinea aerophila DSM 14535 = NBRC 104270	0	0	0	0	0	0	0	0	0	0	0	0	0	0	0	0	0	0	0	0	0	0
Bacteria|Chloroflexi|Chloroflexi|Chloroflexales|Chloroflexaceae|Chloroflexus|Chloroflexus aggregans|Chloroflexus aggregans DSM 9485	0	0	0	0	0	0	0	0	0	0	0	0	0	0	0	0	0	0	0	0	0	0
Bacteria|Chloroflexi|Chloroflexi|Chloroflexales|Chloroflexaceae|Chloroflexus|Chloroflexus aurantiacus|Chloroflexus aurantiacus J-10-fl	0	0	0	0	0	0	0	0	0	0	0	0	0	0	0	0	0	0	0	0	0	0
Bacteria|Chloroflexi|Chloroflexi|Chloroflexales|Chloroflexaceae|Chloroflexus|Chloroflexus sp. Y-400-fl	0	0	0	0	0	0	0	0	0	0	0	0	0	0	0	0	0	0	0	0	0	0
Bacteria|Chloroflexi|Chloroflexi|Chloroflexales|Chloroflexaceae|Roseiflexus|Roseiflexus castenholzii|Roseiflexus castenholzii DSM 13941	0	0	0	0	0	0	0	0	0	0	0	0	0	0	0	0	0	0	0	0	0	0
Bacteria|Chloroflexi|Chloroflexi|Chloroflexales|Chloroflexaceae|Roseiflexus|Roseiflexus sp. RS-1	0	0	0	0	0	0	0	0	0	0	0	0	0	0	0	0	0	0	0	0	0	0
Bacteria|Chloroflexi|Chloroflexi|Chloroflexales|Oscillochloridaceae|Oscillochloris|Oscillochloris trichoides|Oscillochloris trichoides DG-6	0	0	0	0	0	0	0	0	0	0	0	1	0	0	0	0	0	0	0	0	0	0
Bacteria|Chloroflexi|Chloroflexi|Herpetosiphonales|Herpetosiphonaceae|Herpetosiphon|Herpetosiphon aurantiacus|Herpetosiphon aurantiacus DSM 785	0	0	0	1	0	0	0	0	0	0	0	4	1	0	1	0	0	2	0	0	0	0
Bacteria|Chloroflexi|Dehalococcoidia|Dehalococcoidales|Dehalococcoidaceae|Dehalococcoides|Dehalococcoides mccartyi|Dehalococcoides mccartyi 195	0	0	0	0	0	0	0	0	0	0	0	0	0	0	0	0	0	0	0	0	0	0
Bacteria|Chloroflexi|Dehalococcoidia|Dehalococcoidales|Dehalococcoidaceae|Dehalococcoides|Dehalococcoides mccartyi|Dehalococcoides mccartyi BAV1	0	0	0	0	0	0	0	0	0	0	0	0	0	0	0	0	0	0	0	0	0	0
Bacteria|Chloroflexi|Dehalococcoidia|Dehalococcoidales|Dehalococcoidaceae|Dehalococcoides|Dehalococcoides mccartyi|Dehalococcoides mccartyi CBDB1	0	0	0	0	0	0	0	0	0	0	0	0	0	0	0	0	0	0	0	0	0	0
Bacteria|Chloroflexi|Dehalococcoidia|Dehalococcoidales|Dehalococcoidaceae|Dehalococcoides|Dehalococcoides mccartyi|Dehalococcoides mccartyi GT	0	0	0	0	0	0	0	0	0	0	0	0	0	0	0	0	0	0	0	0	0	0
Bacteria|Chloroflexi|Dehalococcoidia|Dehalococcoidales|Dehalococcoidaceae|Dehalococcoides|Dehalococcoides mccartyi|Dehalococcoides mccartyi VS	0	0	0	0	0	0	0	0	0	0	0	0	0	0	0	0	0	0	0	0	0	0
Bacteria|Chloroflexi|Dehalococcoidia|Dehalogenimonas|Dehalogenimonas lykanthroporepellens|Dehalogenimonas lykanthroporepellens BL-DC-9	0	0	0	0	0	0	0	0	0	0	0	0	0	0	0	0	0	0	0	0	0	0
Bacteria|Chloroflexi|Ktedonobacteria|Ktedonobacterales|Ktedonobacteraceae|Ktedonobacter|Ktedonobacter racemifer|Ktedonobacter racemifer DSM 44963	0	0	0	0	0	0	0	0	0	0	0	0	0	0	0	0	0	0	0	0	0	0
Bacteria|Chloroflexi|Thermomicrobia|Sphaerobacteridae|Sphaerobacterales|Sphaerobacterineae|Sphaerobacteraceae|Sphaerobacter|Sphaerobacter thermophilus|Sphaerobacter thermophilus DSM 20745	0	0	0	0	0	0	0	0	0	0	0	0	0	0	0	0	0	0	0	0	0	0
Bacteria|Chloroflexi|Thermomicrobia|Thermomicrobiales|Thermomicrobiaceae|Thermomicrobium|Thermomicrobium roseum|Thermomicrobium roseum DSM 5159	0	0	0	0	0	0	0	0	0	0	0	0	0	0	0	0	0	0	0	0	0	0
Bacteria|Chrysiogenetes|Chrysiogenetes|Chrysiogenales|Chrysiogenaceae|Desulfurispirillum|Desulfurispirillum indicum|Desulfurispirillum indicum S5	0	0	1	0	0	0	0	0	0	0	0	0	0	0	0	0	0	0	0	0	0	0
Bacteria|Cyanobacteria|Gloeobacteria|Gloeobacterales|Gloeobacter|Gloeobacter violaceus|Gloeobacter violaceus PCC 7421	0	0	0	0	0	0	0	0	0	0	0	0	0	0	0	0	0	0	0	0	0	0
Bacteria|Cyanobacteria|Nostocales|Nostocaceae|Anabaena|Anabaena variabilis|Anabaena variabilis ATCC 29413	0	0	0	0	0	0	0	0	0	0	0	0	0	0	1	0	0	0	1	0	0	0
Bacteria|Cyanobacteria|Nostocales|Nostocaceae|Cylindrospermopsis|Cylindrospermopsis raciborskii|Cylindrospermopsis raciborskii CS-505	0	0	0	0	0	0	0	0	0	0	0	0	0	0	0	0	0	0	0	0	0	0
Bacteria|Cyanobacteria|Nostocales|Nostocaceae|Nodularia|Nodularia spumigena|Nodularia spumigena CCY9414	0	0	0	0	0	0	0	0	0	0	0	0	0	0	0	0	0	0	0	0	0	0
Bacteria|Cyanobacteria|Nostocales|Nostocaceae|Nostoc|Nostoc punctiforme|Nostoc punctiforme PCC 73102	0	1	0	0	0	0	0	0	0	0	0	0	0	0	0	0	0	0	0	0	0	0
Bacteria|Cyanobacteria|Nostocales|Nostocaceae|Nostoc|Nostoc sp. PCC 7120	0	0	0	0	0	0	0	0	0	0	0	0	0	0	0	0	0	0	0	0	0	0
Bacteria|Cyanobacteria|Nostocales|Nostocaceae|Raphidiopsis|Raphidiopsis brookii|Raphidiopsis brookii D9	0	0	0	0	0	0	0	0	0	0	0	0	0	0	0	0	0	0	0	0	0	0
Bacteria|Cyanobacteria|Nostocales|Nostocaceae|Trichormus|Trichormus azollae|'Nostoc azollae' 0708	0	0	0	0	0	0	0	0	0	0	0	0	0	0	0	0	0	0	0	0	0	0
Bacteria|Cyanobacteria|Oscillatoriophycideae|Chroococcales|Acaryochloris|Acaryochloris marina|Acaryochloris marina MBIC11017	0	0	0	0	0	0	0	0	0	0	0	0	0	0	0	0	0	0	0	0	0	0
Bacteria|Cyanobacteria|Oscillatoriophycideae|Chroococcales|Acaryochloris|Acaryochloris sp. CCMEE 5410	0	0	0	0	0	0	0	0	0	0	0	0	0	0	0	0	0	0	0	0	0	0
Bacteria|Cyanobacteria|Oscillatoriophycideae|Chroococcales|Candidatus Atelocyanobacterium|Candidatus Atelocyanobacterium thalassa	0	0	0	0	0	0	0	0	0	0	0	0	0	0	0	0	0	0	0	0	0	0
Bacteria|Cyanobacteria|Oscillatoriophycideae|Chroococcales|Crocosphaera|Crocosphaera watsonii|Crocosphaera watsonii WH 8501	0	0	0	0	0	0	0	0	0	0	0	0	0	0	0	0	0	0	0	0	0	0
Bacteria|Cyanobacteria|Oscillatoriophycideae|Chroococcales|Cyanobium|Cyanobium sp. PCC 7001	0	0	0	0	0	0	0	0	0	0	0	0	0	0	0	0	0	0	0	0	1	0
Bacteria|Cyanobacteria|Oscillatoriophycideae|Chroococcales|Cyanothece|Cyanothece sp. ATCC 51142	0	0	0	0	0	0	0	0	0	0	0	0	0	0	0	0	0	0	0	0	0	0
Bacteria|Cyanobacteria|Oscillatoriophycideae|Chroococcales|Cyanothece|Cyanothece sp. ATCC 51472	0	0	0	0	0	0	0	0	0	0	0	0	0	0	0	0	0	0	0	0	0	0
Bacteria|Cyanobacteria|Oscillatoriophycideae|Chroococcales|Cyanothece|Cyanothece sp. CCY0110	0	0	0	0	0	0	0	0	0	0	0	0	0	0	0	0	0	0	0	0	0	0
Bacteria|Cyanobacteria|Oscillatoriophycideae|Chroococcales|Cyanothece|Cyanothece sp. PCC 7424	0	0	0	0	0	0	0	0	0	0	0	0	0	0	0	0	0	0	0	0	0	0
Bacteria|Cyanobacteria|Oscillatoriophycideae|Chroococcales|Cyanothece|Cyanothece sp. PCC 7425	0	0	0	0	0	0	0	0	0	0	0	0	0	0	0	0	0	0	0	0	0	0
Bacteria|Cyanobacteria|Oscillatoriophycideae|Chroococcales|Cyanothece|Cyanothece sp. PCC 7822	0	0	0	0	0	0	0	0	0	0	0	0	0	0	0	0	0	0	3	3	0	1
Bacteria|Cyanobacteria|Oscillatoriophycideae|Chroococcales|Cyanothece|Cyanothece sp. PCC 8801	0	0	0	0	0	0	0	0	0	0	0	0	0	0	0	0	0	0	0	0	0	0
Bacteria|Cyanobacteria|Oscillatoriophycideae|Chroococcales|Cyanothece|Cyanothece sp. PCC 8802	0	0	0	0	0	0	0	0	0	0	0	0	0	0	0	0	0	0	0	0	0	0
Bacteria|Cyanobacteria|Oscillatoriophycideae|Chroococcales|Microcystis|Microcystis aeruginosa|Microcystis aeruginosa NIES-843	30	7	13	2	15	0	1	0	2	1	0	0	0	0	0	0	0	0	37615	39769	12708	3563
Bacteria|Cyanobacteria|Oscillatoriophycideae|Chroococcales|Synechococcus|Synechococcus elongatus|Synechococcus elongatus PCC 6301	0	0	0	0	0	0	0	0	0	0	0	0	0	0	0	0	0	0	0	0	0	0
Bacteria|Cyanobacteria|Oscillatoriophycideae|Chroococcales|Synechococcus|Synechococcus elongatus|Synechococcus elongatus PCC 7942	0	0	0	0	0	0	0	0	0	0	0	0	0	0	0	0	0	0	0	0	0	0
Bacteria|Cyanobacteria|Oscillatoriophycideae|Chroococcales|Synechococcus|Synechococcus sp. BL107	0	0	0	0	0	0	0	0	0	0	0	0	0	0	0	0	0	0	0	0	0	0
Bacteria|Cyanobacteria|Oscillatoriophycideae|Chroococcales|Synechococcus|Synechococcus sp. CB0101	0	0	0	0	0	0	0	0	0	0	0	0	0	0	0	0	0	0	5	0	2	0
Bacteria|Cyanobacteria|Oscillatoriophycideae|Chroococcales|Synechococcus|Synechococcus sp. CB0205	0	0	0	0	0	0	0	0	0	0	0	0	0	0	0	0	0	0	2	0	2	11
Bacteria|Cyanobacteria|Oscillatoriophycideae|Chroococcales|Synechococcus|Synechococcus sp. CC9311	0	0	0	0	0	0	0	0	0	0	0	0	0	0	0	0	0	0	0	0	0	0
Bacteria|Cyanobacteria|Oscillatoriophycideae|Chroococcales|Synechococcus|Synechococcus sp. CC9605	0	0	0	0	0	0	0	0	0	0	0	0	0	0	0	0	0	0	0	0	0	0
Bacteria|Cyanobacteria|Oscillatoriophycideae|Chroococcales|Synechococcus|Synechococcus sp. CC9902	0	0	0	0	0	0	0	0	0	0	0	0	0	0	0	0	0	0	0	0	0	0
Bacteria|Cyanobacteria|Oscillatoriophycideae|Chroococcales|Synechococcus|Synechococcus sp. JA-2-3B'a(2-13)	0	0	0	0	0	0	0	0	0	0	0	0	0	0	0	0	0	0	0	0	0	0
Bacteria|Cyanobacteria|Oscillatoriophycideae|Chroococcales|Synechococcus|Synechococcus sp. JA-3-3Ab	0	0	0	0	0	0	0	0	0	0	0	0	0	0	0	0	0	0	0	0	0	0
Bacteria|Cyanobacteria|Oscillatoriophycideae|Chroococcales|Synechococcus|Synechococcus sp. PCC 7002	0	0	0	0	0	0	0	0	0	0	0	0	0	0	0	0	0	0	0	0	0	0
Bacteria|Cyanobacteria|Oscillatoriophycideae|Chroococcales|Synechococcus|Synechococcus sp. PCC 7335	0	0	0	0	0	0	0	0	0	0	0	0	0	0	0	0	0	0	0	0	0	0
Bacteria|Cyanobacteria|Oscillatoriophycideae|Chroococcales|Synechococcus|Synechococcus sp. RCC307	0	0	0	0	0	0	0	0	0	0	0	0	0	0	0	0	0	0	0	0	0	0
Bacteria|Cyanobacteria|Oscillatoriophycideae|Chroococcales|Synechococcus|Synechococcus sp. RS9916	0	0	0	0	0	0	0	0	0	0	0	0	0	0	0	0	0	0	0	0	0	0
Bacteria|Cyanobacteria|Oscillatoriophycideae|Chroococcales|Synechococcus|Synechococcus sp. RS9917	0	0	0	0	0	0	0	0	0	0	0	0	0	0	0	0	0	0	2	0	5	2
Bacteria|Cyanobacteria|Oscillatoriophycideae|Chroococcales|Synechococcus|Synechococcus sp. WH 5701	0	0	0	0	0	0	0	0	0	0	0	0	0	0	0	0	0	0	0	0	0	0
Bacteria|Cyanobacteria|Oscillatoriophycideae|Chroococcales|Synechococcus|Synechococcus sp. WH 7803	0	0	0	0	0	0	0	0	0	0	0	0	0	0	0	0	0	0	0	0	0	0
Bacteria|Cyanobacteria|Oscillatoriophycideae|Chroococcales|Synechococcus|Synechococcus sp. WH 7805	0	0	0	0	0	0	0	0	0	0	0	0	0	0	0	0	0	0	0	0	0	0
Bacteria|Cyanobacteria|Oscillatoriophycideae|Chroococcales|Synechococcus|Synechococcus sp. WH 8016	0	0	0	0	0	0	0	0	0	0	0	0	0	0	0	0	0	0	0	0	0	0
Bacteria|Cyanobacteria|Oscillatoriophycideae|Chroococcales|Synechococcus|Synechococcus sp. WH 8102	0	0	0	0	0	0	0	0	0	0	0	0	0	0	0	0	0	0	0	0	0	0
Bacteria|Cyanobacteria|Oscillatoriophycideae|Chroococcales|Synechococcus|Synechococcus sp. WH 8109	0	0	0	0	0	0	0	0	0	0	0	0	0	0	0	0	0	0	0	0	0	0
Bacteria|Cyanobacteria|Oscillatoriophycideae|Chroococcales|Synechocystis|Synechocystis sp. PCC 6803	0	0	0	0	0	0	0	0	0	0	0	0	0	0	0	0	0	0	0	0	0	0
Bacteria|Cyanobacteria|Oscillatoriophycideae|Chroococcales|Synechocystis|Synechocystis sp. PCC 6803|Synechocystis sp. PCC 6803 substr. GT-I	0	0	0	0	0	0	0	0	0	0	0	0	0	0	0	0	0	0	0	0	0	0
Bacteria|Cyanobacteria|Oscillatoriophycideae|Chroococcales|Synechocystis|Synechocystis sp. PCC 6803|Synechocystis sp. PCC 6803 substr. PCC-N	0	0	0	0	0	0	0	0	0	0	0	0	0	0	0	0	0	0	0	0	0	0
Bacteria|Cyanobacteria|Oscillatoriophycideae|Chroococcales|Synechocystis|Synechocystis sp. PCC 6803|Synechocystis sp. PCC 6803 substr. PCC-P	0	0	0	0	0	0	0	0	0	0	0	0	0	0	0	0	0	0	0	0	0	0
Bacteria|Cyanobacteria|Oscillatoriophycideae|Chroococcales|Thermosynechococcus|Thermosynechococcus elongatus|Thermosynechococcus elongatus BP-1	0	0	0	0	0	0	0	0	0	0	0	0	0	0	0	0	0	0	0	0	0	0
Bacteria|Cyanobacteria|Oscillatoriophycideae|Oscillatoriales|Arthrospira|Arthrospira maxima|Arthrospira maxima CS-328	0	0	0	0	0	0	0	0	0	0	0	0	0	0	0	0	0	0	0	0	0	0
Bacteria|Cyanobacteria|Oscillatoriophycideae|Oscillatoriales|Arthrospira|Arthrospira platensis|Arthrospira platensis str. Paraca	0	0	0	0	0	0	0	0	0	0	0	0	0	0	0	0	0	0	0	0	0	0
Bacteria|Cyanobacteria|Oscillatoriophycideae|Oscillatoriales|Arthrospira|Arthrospira sp. PCC 8005	0	0	1	0	0	0	0	0	0	0	0	0	0	0	0	0	0	0	0	0	0	0
Bacteria|Cyanobacteria|Oscillatoriophycideae|Oscillatoriales|Coleofasciculus|Coleofasciculus chthonoplastes|Coleofasciculus chthonoplastes PCC 7420	0	0	0	0	0	0	0	0	0	0	0	0	0	0	0	0	0	0	0	0	0	0
Bacteria|Cyanobacteria|Oscillatoriophycideae|Oscillatoriales|Kamptonema|[Oscillatoria] sp. PCC 6506	0	0	0	0	0	0	0	0	0	0	0	0	0	0	0	0	0	0	0	0	0	0
Bacteria|Cyanobacteria|Oscillatoriophycideae|Oscillatoriales|Leptolyngbya|Leptolyngbya valderiana|Leptolyngbya valderiana BDU 20041	0	0	0	0	0	0	0	0	0	0	0	0	0	0	0	0	0	0	0	0	0	0
Bacteria|Cyanobacteria|Oscillatoriophycideae|Oscillatoriales|Lyngbya|Lyngbya sp. PCC 8106	0	0	0	0	0	0	0	0	5	0	0	0	0	0	0	0	0	0	1	1	0	0
Bacteria|Cyanobacteria|Oscillatoriophycideae|Oscillatoriales|Microcoleus|Microcoleus vaginatus|Microcoleus vaginatus FGP-2	1	1	10	4	6	0	0	7	0	0	0	0	0	1	0	0	4	3	0	0	0	0
Bacteria|Cyanobacteria|Oscillatoriophycideae|Oscillatoriales|Moorea|Moorea producens|Moorea producens 3L	0	0	0	0	0	0	0	0	0	0	0	0	0	0	0	0	0	0	0	0	0	0
Bacteria|Cyanobacteria|Oscillatoriophycideae|Oscillatoriales|Trichodesmium|Trichodesmium erythraeum|Trichodesmium erythraeum IMS101	0	0	0	0	0	0	0	0	0	0	0	0	0	0	0	0	0	0	0	0	0	0
Bacteria|Cyanobacteria|Prochlorales|Prochlorococcaceae|Prochlorococcus|Prochlorococcus marinus|Prochlorococcus marinus str. AS9601	0	0	0	0	0	0	0	0	0	0	0	0	0	0	0	0	0	0	0	0	0	0
Bacteria|Cyanobacteria|Prochlorales|Prochlorococcaceae|Prochlorococcus|Prochlorococcus marinus|Prochlorococcus marinus str. MIT 9202	0	0	0	0	0	0	0	0	0	0	0	0	0	0	0	0	0	0	0	0	0	0
Bacteria|Cyanobacteria|Prochlorales|Prochlorococcaceae|Prochlorococcus|Prochlorococcus marinus|Prochlorococcus marinus str. MIT 9211	0	0	0	0	0	0	0	0	0	0	0	0	0	0	0	0	0	0	0	0	0	0
Bacteria|Cyanobacteria|Prochlorales|Prochlorococcaceae|Prochlorococcus|Prochlorococcus marinus|Prochlorococcus marinus str. MIT 9215	0	0	0	0	0	0	0	0	0	0	0	0	0	0	0	0	0	0	0	0	0	0
Bacteria|Cyanobacteria|Prochlorales|Prochlorococcaceae|Prochlorococcus|Prochlorococcus marinus|Prochlorococcus marinus str. MIT 9301	0	0	0	0	0	0	0	0	0	0	0	0	0	0	0	0	0	0	0	0	0	0
Bacteria|Cyanobacteria|Prochlorales|Prochlorococcaceae|Prochlorococcus|Prochlorococcus marinus|Prochlorococcus marinus str. MIT 9303	0	0	0	0	0	0	0	0	0	0	0	0	0	0	0	0	0	0	0	0	0	0
Bacteria|Cyanobacteria|Prochlorales|Prochlorococcaceae|Prochlorococcus|Prochlorococcus marinus|Prochlorococcus marinus str. MIT 9312	0	0	0	0	0	0	0	0	0	0	0	0	0	0	0	0	0	0	0	0	0	0
Bacteria|Cyanobacteria|Prochlorales|Prochlorococcaceae|Prochlorococcus|Prochlorococcus marinus|Prochlorococcus marinus str. MIT 9313	0	0	0	0	0	0	0	0	0	0	0	0	0	0	0	0	0	0	0	0	0	0
Bacteria|Cyanobacteria|Prochlorales|Prochlorococcaceae|Prochlorococcus|Prochlorococcus marinus|Prochlorococcus marinus str. MIT 9515	0	0	0	0	0	0	0	0	0	0	0	0	0	0	0	0	0	0	0	0	0	0
Bacteria|Cyanobacteria|Prochlorales|Prochlorococcaceae|Prochlorococcus|Prochlorococcus marinus|Prochlorococcus marinus str. NATL1A	0	0	0	0	0	0	0	0	0	0	0	0	0	0	0	0	0	0	0	0	0	0
Bacteria|Cyanobacteria|Prochlorales|Prochlorococcaceae|Prochlorococcus|Prochlorococcus marinus|Prochlorococcus marinus str. NATL2A	0	0	0	0	0	0	0	0	0	0	0	0	0	0	0	0	0	0	0	0	0	0
Bacteria|Cyanobacteria|Prochlorales|Prochlorococcaceae|Prochlorococcus|Prochlorococcus marinus|Prochlorococcus marinus subsp. marinus|Prochlorococcus marinus subsp. marinus str. CCMP1375	0	0	0	0	0	0	0	0	0	0	0	0	0	0	0	0	0	0	0	0	0	0
Bacteria|Cyanobacteria|Prochlorales|Prochlorococcaceae|Prochlorococcus|Prochlorococcus marinus|Prochlorococcus marinus subsp. pastoris|Prochlorococcus marinus subsp. pastoris str. CCMP1986	0	0	0	0	0	0	0	0	0	0	0	0	0	0	0	0	0	0	0	0	0	0
Bacteria|Cyanobacteria|Stigonematales|Fischerella|Fischerella sp. JSC-11	0	0	0	0	0	0	0	0	0	0	0	0	0	0	0	0	0	0	0	0	0	0
Bacteria|Deferribacteres|Deferribacteres|Deferribacterales|Deferribacteraceae|Calditerrivibrio|Calditerrivibrio nitroreducens|Calditerrivibrio nitroreducens DSM 19672	0	0	0	0	0	0	0	0	0	0	0	0	0	0	0	0	0	0	0	0	0	0
Bacteria|Deferribacteres|Deferribacteres|Deferribacterales|Deferribacteraceae|Deferribacter|Deferribacter desulfuricans|Deferribacter desulfuricans SSM1	0	0	0	0	0	0	0	0	0	0	0	0	0	0	0	0	0	0	0	0	0	0
Bacteria|Deferribacteres|Deferribacteres|Deferribacterales|Deferribacteraceae|Denitrovibrio|Denitrovibrio acetiphilus|Denitrovibrio acetiphilus DSM 12809	0	0	0	0	0	0	0	0	0	0	0	0	0	0	0	0	0	0	0	0	0	0
Bacteria|Deferribacteres|Deferribacteres|Deferribacterales|Deferribacteraceae|Flexistipes|Flexistipes sinusarabici|Flexistipes sinusarabici DSM 4947	0	0	0	0	0	0	0	0	0	0	0	0	0	0	0	0	0	0	0	0	0	0
Bacteria|Deinococcus-Thermus|Deinococci|Deinococcales|Deinococcaceae|Deinococcus|Deinococcus deserti|Deinococcus deserti VCD115	0	0	0	0	0	0	0	0	0	0	0	0	0	0	0	0	0	0	0	0	0	0
Bacteria|Deinococcus-Thermus|Deinococci|Deinococcales|Deinococcaceae|Deinococcus|Deinococcus geothermalis|Deinococcus geothermalis DSM 11300	0	0	0	0	0	0	0	0	0	0	0	0	0	0	0	0	0	0	0	0	0	0
Bacteria|Deinococcus-Thermus|Deinococci|Deinococcales|Deinococcaceae|Deinococcus|Deinococcus gobiensis|Deinococcus gobiensis I-0	0	0	0	0	0	0	0	0	2	0	0	0	0	0	0	1	0	0	0	0	0	0
Bacteria|Deinococcus-Thermus|Deinococci|Deinococcales|Deinococcaceae|Deinococcus|Deinococcus maricopensis|Deinococcus maricopensis DSM 21211	0	0	0	0	0	0	0	0	0	0	0	0	0	0	0	0	0	0	0	0	0	0
Bacteria|Deinococcus-Thermus|Deinococci|Deinococcales|Deinococcaceae|Deinococcus|Deinococcus proteolyticus|Deinococcus proteolyticus MRP	0	0	0	1	0	0	0	0	0	0	2	0	0	0	0	0	0	0	0	0	0	0
Bacteria|Deinococcus-Thermus|Deinococci|Deinococcales|Deinococcaceae|Deinococcus|Deinococcus radiodurans|Deinococcus radiodurans R1	0	2	0	0	0	0	0	0	0	0	0	0	0	0	0	0	0	0	0	0	0	0
Bacteria|Deinococcus-Thermus|Deinococci|Deinococcales|Trueperaceae|Truepera|Truepera radiovictrix|Truepera radiovictrix DSM 17093	0	0	0	0	0	0	0	0	0	0	0	0	0	0	0	0	0	0	0	0	0	0
Bacteria|Deinococcus-Thermus|Deinococci|Thermales|Thermaceae|Marinithermus|Marinithermus hydrothermalis|Marinithermus hydrothermalis DSM 14884	0	0	0	0	0	0	0	0	0	0	0	0	0	0	0	0	0	0	0	0	0	0
Bacteria|Deinococcus-Thermus|Deinococci|Thermales|Thermaceae|Meiothermus|Meiothermus ruber|Meiothermus ruber DSM 1279	0	0	0	0	0	0	0	0	0	0	0	0	0	0	0	0	0	0	0	0	0	0
Bacteria|Deinococcus-Thermus|Deinococci|Thermales|Thermaceae|Meiothermus|Meiothermus silvanus|Meiothermus silvanus DSM 9946	0	0	0	0	0	0	0	0	0	0	0	0	0	0	0	0	1	1	0	0	0	0
Bacteria|Deinococcus-Thermus|Deinococci|Thermales|Thermaceae|Oceanithermus|Oceanithermus profundus|Oceanithermus profundus DSM 14977	0	0	0	0	0	0	0	0	0	0	0	0	0	0	0	0	0	0	0	0	0	0
Bacteria|Deinococcus-Thermus|Deinococci|Thermales|Thermaceae|Thermus|Thermus aquaticus|Thermus aquaticus Y51MC23	0	0	0	0	0	0	0	0	0	0	0	0	0	0	0	0	0	0	0	0	0	0
Bacteria|Deinococcus-Thermus|Deinococci|Thermales|Thermaceae|Thermus|Thermus scotoductus|Thermus scotoductus SA-01	0	0	0	0	0	0	0	0	0	0	0	0	0	0	0	0	0	0	0	0	0	0
Bacteria|Deinococcus-Thermus|Deinococci|Thermales|Thermaceae|Thermus|Thermus sp. CCB_US3_UF1	0	0	0	0	0	0	0	0	0	0	0	0	0	0	0	0	0	0	0	0	0	0
Bacteria|Deinococcus-Thermus|Deinococci|Thermales|Thermaceae|Thermus|Thermus sp. RL	0	0	0	0	0	0	0	0	0	0	0	0	0	0	0	0	0	0	0	0	0	0
Bacteria|Deinococcus-Thermus|Deinococci|Thermales|Thermaceae|Thermus|Thermus thermophilus|Thermus thermophilus HB27	0	0	0	0	0	0	0	0	0	0	0	0	0	0	0	0	0	0	0	0	0	0
Bacteria|Deinococcus-Thermus|Deinococci|Thermales|Thermaceae|Thermus|Thermus thermophilus|Thermus thermophilus HB8	0	0	0	0	0	0	0	0	0	0	0	0	0	0	0	0	0	0	0	0	0	0
Bacteria|Deinococcus-Thermus|Deinococci|Thermales|Thermaceae|Thermus|Thermus thermophilus|Thermus thermophilus JL-18	0	0	0	0	0	0	0	0	0	0	0	0	0	0	0	0	0	0	0	0	0	0
Bacteria|Deinococcus-Thermus|Deinococci|Thermales|Thermaceae|Thermus|Thermus thermophilus|Thermus thermophilus SG0.5JP17-16	0	0	0	0	0	0	0	0	0	0	0	0	0	0	0	0	0	0	0	0	0	0
Bacteria|Dictyoglomi|Dictyoglomia|Dictyoglomales|Dictyoglomaceae|Dictyoglomus|Dictyoglomus thermophilum|Dictyoglomus thermophilum H-6-12	0	0	0	0	0	0	0	0	0	0	0	0	0	0	0	0	0	0	0	0	0	0
Bacteria|Dictyoglomi|Dictyoglomia|Dictyoglomales|Dictyoglomaceae|Dictyoglomus|Dictyoglomus turgidum|Dictyoglomus turgidum DSM 6724	0	0	0	0	0	0	0	0	0	0	0	0	0	0	0	0	0	0	0	0	0	0
Bacteria|Elusimicrobia|Elusimicrobia|Elusimicrobiales|Elusimicrobiaceae|Elusimicrobium|Elusimicrobium minutum|Elusimicrobium minutum Pei191	0	0	0	0	0	0	0	0	0	0	0	0	0	0	0	0	0	0	0	0	0	0
Bacteria|Elusimicrobia|environmental samples|uncultured Termite group 1 bacterium|uncultured Termite group 1 bacterium phylotype Rs-D17	0	0	0	0	0	0	0	0	0	0	0	0	0	0	0	0	0	0	0	0	0	0
Bacteria|Fibrobacteres/Acidobacteria group|Acidobacteria|Acidobacteriia|Acidobacteriales|Acidobacteriaceae|Acidobacterium|Acidobacterium capsulatum|Acidobacterium capsulatum ATCC 51196	0	0	0	0	0	0	0	0	0	0	0	0	0	0	0	0	0	0	0	0	0	0
Bacteria|Fibrobacteres/Acidobacteria group|Acidobacteria|Acidobacteriia|Acidobacteriales|Acidobacteriaceae|Granulicella|Granulicella mallensis|Granulicella mallensis MP5ACTX8	0	0	0	0	0	0	0	0	0	0	0	0	0	0	0	0	0	0	0	0	0	0
Bacteria|Fibrobacteres/Acidobacteria group|Acidobacteria|Acidobacteriia|Acidobacteriales|Acidobacteriaceae|Granulicella|Granulicella tundricola|Granulicella tundricola MP5ACTX9	0	0	0	0	0	0	0	0	0	0	0	0	0	0	0	0	0	0	0	0	0	0
Bacteria|Fibrobacteres/Acidobacteria group|Acidobacteria|Acidobacteriia|Acidobacteriales|Acidobacteriaceae|Terriglobus|Terriglobus roseus|Terriglobus roseus DSM 18391	0	0	0	0	0	0	0	0	0	0	0	0	0	0	0	0	0	0	0	0	0	0
Bacteria|Fibrobacteres/Acidobacteria group|Acidobacteria|Acidobacteriia|Acidobacteriales|Acidobacteriaceae|Terriglobus|Terriglobus saanensis|Terriglobus saanensis SP1PR4	0	0	0	0	0	0	0	0	0	0	0	0	0	0	0	0	0	0	0	0	0	0
Bacteria|Fibrobacteres/Acidobacteria group|Acidobacteria|Holophagae|Holophagales|Holophagaceae|Holophaga|Holophaga foetida|Holophaga foetida DSM 6591	0	0	0	0	0	0	0	0	0	0	0	0	0	0	0	0	0	0	0	0	0	0
Bacteria|Fibrobacteres/Acidobacteria group|Acidobacteria|Solibacteres|Solibacterales|Solibacteraceae|Candidatus Solibacter|Candidatus Solibacter usitatus|Candidatus Solibacter usitatus Ellin6076	0	0	0	0	0	0	0	0	0	0	0	0	0	0	0	0	0	0	0	0	0	0
Bacteria|Fibrobacteres/Acidobacteria group|Acidobacteria|unclassified Acidobacteria|Candidatus Chloracidobacterium|Candidatus Chloracidobacterium thermophilum|Candidatus Chloracidobacterium thermophilum B	0	0	0	0	0	0	0	0	0	0	0	0	0	0	0	0	0	0	0	0	0	0
Bacteria|Fibrobacteres/Acidobacteria group|Acidobacteria|unclassified Acidobacteria|Candidatus Koribacter|Candidatus Koribacter versatilis|Candidatus Koribacter versatilis Ellin345	0	0	0	0	0	0	0	0	0	0	0	0	0	0	0	0	0	0	0	0	0	0
Bacteria|Fibrobacteres/Acidobacteria group|Fibrobacteres|Fibrobacteria|Fibrobacterales|Fibrobacteraceae|Fibrobacter|Fibrobacter succinogenes|Fibrobacter succinogenes subsp. succinogenes|Fibrobacter succinogenes subsp. succinogenes S85	0	0	1	0	0	0	0	0	0	0	3	0	0	0	0	0	0	0	0	0	0	0
Bacteria|Firmicutes|Bacilli|Bacillales|Alicyclobacillaceae|Alicyclobacillus|Alicyclobacillus acidocaldarius|Alicyclobacillus acidocaldarius LAA1	0	0	0	0	0	0	0	0	0	0	0	0	0	0	0	0	0	0	0	0	0	0
Bacteria|Firmicutes|Bacilli|Bacillales|Alicyclobacillaceae|Alicyclobacillus|Alicyclobacillus acidocaldarius|Alicyclobacillus acidocaldarius subsp. acidocaldarius|Alicyclobacillus acidocaldarius subsp. acidocaldarius DSM 446	0	0	0	0	0	0	0	0	0	0	0	0	0	0	0	0	0	0	0	0	0	0
Bacteria|Firmicutes|Bacilli|Bacillales|Alicyclobacillaceae|Alicyclobacillus|Alicyclobacillus acidocaldarius|Alicyclobacillus acidocaldarius subsp. acidocaldarius|Alicyclobacillus acidocaldarius subsp. acidocaldarius Tc-4-1	0	0	0	0	0	0	0	0	0	0	0	0	0	0	0	0	0	0	0	0	0	0
Bacteria|Firmicutes|Bacilli|Bacillales|Alicyclobacillaceae|Kyrpidia|Kyrpidia tusciae|Kyrpidia tusciae DSM 2912	0	0	0	0	0	0	0	0	0	0	0	0	0	0	0	0	0	0	0	0	0	0
Bacteria|Firmicutes|Bacilli|Bacillales|Bacillaceae|Anoxybacillus|Anoxybacillus flavithermus|Anoxybacillus flavithermus WK1	0	0	0	0	0	0	0	0	0	0	0	0	0	0	0	0	0	0	0	0	0	0
Bacteria|Firmicutes|Bacilli|Bacillales|Bacillaceae|Bacillus|Bacillus cellulosilyticus|Bacillus cellulosilyticus DSM 2522	0	0	0	0	0	0	0	0	0	0	0	0	0	0	0	0	0	0	0	0	0	0
Bacteria|Firmicutes|Bacilli|Bacillales|Bacillaceae|Bacillus|Bacillus cereus group|Bacillus anthracis|Bacillus anthracis str. A0174	0	0	0	0	0	0	0	0	0	0	0	0	0	0	0	0	0	0	0	0	0	0
Bacteria|Firmicutes|Bacilli|Bacillales|Bacillaceae|Bacillus|Bacillus cereus group|Bacillus anthracis|Bacillus anthracis str. A0193	0	0	0	0	0	0	0	0	0	0	0	0	0	0	0	0	0	0	0	0	0	0
Bacteria|Firmicutes|Bacilli|Bacillales|Bacillaceae|Bacillus|Bacillus cereus group|Bacillus anthracis|Bacillus anthracis str. A0248	0	0	0	0	0	0	0	0	0	0	0	0	0	0	0	0	0	0	0	0	0	0
Bacteria|Firmicutes|Bacilli|Bacillales|Bacillaceae|Bacillus|Bacillus cereus group|Bacillus anthracis|Bacillus anthracis str. A0389	0	0	0	0	0	0	0	0	0	0	0	0	0	0	0	0	0	0	0	0	0	0
Bacteria|Firmicutes|Bacilli|Bacillales|Bacillaceae|Bacillus|Bacillus cereus group|Bacillus anthracis|Bacillus anthracis str. A0442	0	0	0	0	0	0	0	0	0	0	0	0	0	0	0	0	0	0	0	0	0	0
Bacteria|Firmicutes|Bacilli|Bacillales|Bacillaceae|Bacillus|Bacillus cereus group|Bacillus anthracis|Bacillus anthracis str. A0465	0	0	0	0	0	0	0	0	0	0	0	0	0	0	0	0	0	0	0	0	0	0
Bacteria|Firmicutes|Bacilli|Bacillales|Bacillaceae|Bacillus|Bacillus cereus group|Bacillus anthracis|Bacillus anthracis str. A0488	0	0	0	0	0	0	0	0	0	0	0	0	0	0	0	0	0	0	0	0	0	0
Bacteria|Firmicutes|Bacilli|Bacillales|Bacillaceae|Bacillus|Bacillus cereus group|Bacillus anthracis|Bacillus anthracis str. A1055	0	0	0	0	0	0	0	0	0	0	0	0	0	0	0	0	0	0	0	0	0	0
Bacteria|Firmicutes|Bacilli|Bacillales|Bacillaceae|Bacillus|Bacillus cereus group|Bacillus anthracis|Bacillus anthracis str. A2012	0	0	0	0	0	0	0	0	0	0	0	0	0	0	0	0	0	0	0	0	0	0
Bacteria|Firmicutes|Bacilli|Bacillales|Bacillaceae|Bacillus|Bacillus cereus group|Bacillus anthracis|Bacillus anthracis str. Ames	0	0	0	0	0	0	0	0	0	0	0	0	0	0	0	0	0	0	0	0	0	0
Bacteria|Firmicutes|Bacilli|Bacillales|Bacillaceae|Bacillus|Bacillus cereus group|Bacillus anthracis|Bacillus anthracis str. 'Ames Ancestor'	0	0	0	0	0	0	0	0	0	0	0	0	0	0	0	0	0	0	0	0	0	0
Bacteria|Firmicutes|Bacilli|Bacillales|Bacillaceae|Bacillus|Bacillus cereus group|Bacillus anthracis|Bacillus anthracis str. Australia 94	0	0	0	0	0	0	0	0	0	0	0	0	0	0	0	0	0	0	0	0	0	0
Bacteria|Firmicutes|Bacilli|Bacillales|Bacillaceae|Bacillus|Bacillus cereus group|Bacillus anthracis|Bacillus anthracis str. CDC 684	0	0	0	0	0	0	0	0	0	0	0	0	0	0	0	0	0	0	0	0	0	0
Bacteria|Firmicutes|Bacilli|Bacillales|Bacillaceae|Bacillus|Bacillus cereus group|Bacillus anthracis|Bacillus anthracis str. CNEVA-9066	0	0	0	0	0	0	0	0	0	0	0	0	0	0	0	0	0	0	0	0	0	0
Bacteria|Firmicutes|Bacilli|Bacillales|Bacillaceae|Bacillus|Bacillus cereus group|Bacillus anthracis|Bacillus anthracis str. H9401	0	0	0	0	0	0	0	0	0	0	0	0	0	0	0	0	0	0	0	0	0	0
Bacteria|Firmicutes|Bacilli|Bacillales|Bacillaceae|Bacillus|Bacillus cereus group|Bacillus anthracis|Bacillus anthracis str. Heroin Ba4599	0	0	0	0	0	0	0	0	0	0	0	0	0	0	0	0	0	0	0	0	0	0
Bacteria|Firmicutes|Bacilli|Bacillales|Bacillaceae|Bacillus|Bacillus cereus group|Bacillus anthracis|Bacillus anthracis str. Kruger B	0	0	0	0	0	0	0	0	0	0	0	0	0	0	0	0	0	0	0	0	0	0
Bacteria|Firmicutes|Bacilli|Bacillales|Bacillaceae|Bacillus|Bacillus cereus group|Bacillus anthracis|Bacillus anthracis str. Sterne	0	0	0	0	0	0	0	0	0	0	0	0	0	0	0	0	0	0	0	0	0	0
Bacteria|Firmicutes|Bacilli|Bacillales|Bacillaceae|Bacillus|Bacillus cereus group|Bacillus anthracis|Bacillus anthracis str. Tsiankovskii-I	0	0	0	0	0	0	0	0	0	0	0	0	0	0	0	0	0	0	0	0	0	0
Bacteria|Firmicutes|Bacilli|Bacillales|Bacillaceae|Bacillus|Bacillus cereus group|Bacillus anthracis|Bacillus anthracis str. Tsiankovskii-I	0	0	0	0	0	0	0	0	0	0	0	0	0	0	0	0	0	0	0	0	0	0
Bacteria|Firmicutes|Bacilli|Bacillales|Bacillaceae|Bacillus|Bacillus cereus group|Bacillus anthracis|Bacillus anthracis str. Vollum	0	0	0	0	0	0	0	0	0	0	0	0	0	0	0	0	0	0	0	0	0	0
Bacteria|Firmicutes|Bacilli|Bacillales|Bacillaceae|Bacillus|Bacillus cereus group|Bacillus anthracis|Bacillus anthracis str. Western North America USA6153	0	0	0	0	0	0	0	0	0	0	0	0	0	0	0	0	0	0	0	0	0	0
Bacteria|Firmicutes|Bacilli|Bacillales|Bacillaceae|Bacillus|Bacillus cereus group|Bacillus cereus|Bacillus cereus 03BB102	0	0	0	0	0	0	0	0	0	0	0	0	0	0	0	0	0	0	0	0	0	0
Bacteria|Firmicutes|Bacilli|Bacillales|Bacillaceae|Bacillus|Bacillus cereus group|Bacillus cereus|Bacillus cereus 03BB108	0	0	0	0	0	0	0	0	0	0	0	0	0	0	0	0	0	0	0	0	0	0
Bacteria|Firmicutes|Bacilli|Bacillales|Bacillaceae|Bacillus|Bacillus cereus group|Bacillus cereus|Bacillus cereus 172560W	0	0	0	0	0	0	0	0	0	0	0	0	0	0	0	0	0	0	0	0	0	0
Bacteria|Firmicutes|Bacilli|Bacillales|Bacillaceae|Bacillus|Bacillus cereus group|Bacillus cereus|Bacillus cereus 95/8201	0	0	0	0	0	0	0	0	0	0	0	0	0	0	0	0	0	0	0	0	0	0
Bacteria|Firmicutes|Bacilli|Bacillales|Bacillaceae|Bacillus|Bacillus cereus group|Bacillus cereus|Bacillus cereus AH1134	0	0	0	0	0	0	0	0	0	0	0	0	0	0	0	0	0	0	0	0	0	0
Bacteria|Firmicutes|Bacilli|Bacillales|Bacillaceae|Bacillus|Bacillus cereus group|Bacillus cereus|Bacillus cereus AH1271	0	0	0	0	0	0	0	0	0	0	0	0	0	0	0	0	0	0	0	0	0	0
Bacteria|Firmicutes|Bacilli|Bacillales|Bacillaceae|Bacillus|Bacillus cereus group|Bacillus cereus|Bacillus cereus AH1272	0	0	0	0	0	0	0	0	0	0	0	0	0	0	0	0	0	0	0	0	0	0
Bacteria|Firmicutes|Bacilli|Bacillales|Bacillaceae|Bacillus|Bacillus cereus group|Bacillus cereus|Bacillus cereus AH1273	0	0	0	0	0	0	0	0	0	0	0	0	0	0	0	0	0	0	0	0	0	0
Bacteria|Firmicutes|Bacilli|Bacillales|Bacillaceae|Bacillus|Bacillus cereus group|Bacillus cereus|Bacillus cereus AH187	0	0	0	0	0	0	0	0	0	0	0	0	0	0	0	0	0	0	0	0	0	0
Bacteria|Firmicutes|Bacilli|Bacillales|Bacillaceae|Bacillus|Bacillus cereus group|Bacillus cereus|Bacillus cereus AH603	0	0	0	0	0	0	0	0	0	0	0	0	0	0	0	0	0	0	0	0	0	0
Bacteria|Firmicutes|Bacilli|Bacillales|Bacillaceae|Bacillus|Bacillus cereus group|Bacillus cereus|Bacillus cereus AH621	0	0	0	0	0	0	0	0	0	0	0	0	0	0	0	0	0	0	0	0	0	0
Bacteria|Firmicutes|Bacilli|Bacillales|Bacillaceae|Bacillus|Bacillus cereus group|Bacillus cereus|Bacillus cereus AH676	0	0	0	0	0	0	0	0	0	0	0	0	0	0	0	0	0	0	0	0	0	0
Bacteria|Firmicutes|Bacilli|Bacillales|Bacillaceae|Bacillus|Bacillus cereus group|Bacillus cereus|Bacillus cereus AH820	0	0	0	0	0	0	0	0	0	0	0	0	0	0	0	0	0	0	0	0	0	0
Bacteria|Firmicutes|Bacilli|Bacillales|Bacillaceae|Bacillus|Bacillus cereus group|Bacillus cereus|Bacillus cereus ATCC 10876	0	0	0	0	0	0	0	0	0	0	0	0	0	0	0	0	0	0	0	0	0	0
Bacteria|Firmicutes|Bacilli|Bacillales|Bacillaceae|Bacillus|Bacillus cereus group|Bacillus cereus|Bacillus cereus ATCC 10987	1	0	0	0	0	0	0	0	0	0	0	0	0	0	0	0	0	0	0	0	0	0
Bacteria|Firmicutes|Bacilli|Bacillales|Bacillaceae|Bacillus|Bacillus cereus group|Bacillus cereus|Bacillus cereus ATCC 14579	0	0	0	0	0	0	0	0	0	0	0	0	0	0	0	0	0	0	0	0	0	0
Bacteria|Firmicutes|Bacilli|Bacillales|Bacillaceae|Bacillus|Bacillus cereus group|Bacillus cereus|Bacillus cereus ATCC 4342	0	0	0	0	0	0	0	0	0	0	0	0	0	0	0	0	0	0	0	0	0	0
Bacteria|Firmicutes|Bacilli|Bacillales|Bacillaceae|Bacillus|Bacillus cereus group|Bacillus cereus|Bacillus cereus B4264	1	0	0	0	0	0	0	0	0	0	0	0	0	0	0	0	0	0	0	0	0	0
Bacteria|Firmicutes|Bacilli|Bacillales|Bacillaceae|Bacillus|Bacillus cereus group|Bacillus cereus|Bacillus cereus BDRD-Cer4	0	0	0	0	0	0	0	0	0	0	0	0	0	0	0	0	0	0	0	0	0	0
Bacteria|Firmicutes|Bacilli|Bacillales|Bacillaceae|Bacillus|Bacillus cereus group|Bacillus cereus|Bacillus cereus BDRD-ST196	0	0	0	0	0	0	0	0	0	0	0	0	0	0	0	0	0	0	0	0	0	0
Bacteria|Firmicutes|Bacilli|Bacillales|Bacillaceae|Bacillus|Bacillus cereus group|Bacillus cereus|Bacillus cereus BDRD-ST24	0	0	0	0	0	0	0	0	0	0	0	0	0	0	0	0	0	0	0	0	0	0
Bacteria|Firmicutes|Bacilli|Bacillales|Bacillaceae|Bacillus|Bacillus cereus group|Bacillus cereus|Bacillus cereus BDRD-ST26	0	0	0	0	0	0	0	0	0	0	0	0	0	0	0	0	0	0	0	0	0	0
Bacteria|Firmicutes|Bacilli|Bacillales|Bacillaceae|Bacillus|Bacillus cereus group|Bacillus cereus|Bacillus cereus BGSC 6E1	0	0	0	0	0	0	0	0	0	0	0	0	0	0	0	0	0	0	0	0	0	0
Bacteria|Firmicutes|Bacilli|Bacillales|Bacillaceae|Bacillus|Bacillus cereus group|Bacillus cereus|Bacillus cereus biovar anthracis|Bacillus cereus biovar anthracis str. CI	0	0	0	0	0	0	0	0	0	0	0	0	0	0	0	0	0	0	0	0	0	0
Bacteria|Firmicutes|Bacilli|Bacillales|Bacillaceae|Bacillus|Bacillus cereus group|Bacillus cereus|Bacillus cereus E33L	0	0	0	0	0	0	0	0	0	0	0	0	0	0	0	0	0	0	0	0	0	0
Bacteria|Firmicutes|Bacilli|Bacillales|Bacillaceae|Bacillus|Bacillus cereus group|Bacillus cereus|Bacillus cereus F65185	0	0	0	0	0	0	0	0	0	0	0	0	0	0	0	0	0	0	0	0	0	0
Bacteria|Firmicutes|Bacilli|Bacillales|Bacillaceae|Bacillus|Bacillus cereus group|Bacillus cereus|Bacillus cereus F837/76	0	0	0	0	0	0	0	0	0	0	0	0	0	0	0	0	0	0	0	0	0	0
Bacteria|Firmicutes|Bacilli|Bacillales|Bacillaceae|Bacillus|Bacillus cereus group|Bacillus cereus|Bacillus cereus G9241	0	0	0	0	0	0	0	0	0	0	0	0	0	0	0	0	0	0	0	0	0	0
Bacteria|Firmicutes|Bacilli|Bacillales|Bacillaceae|Bacillus|Bacillus cereus group|Bacillus cereus|Bacillus cereus G9842	0	0	0	0	0	0	0	0	0	0	0	0	0	0	0	0	0	0	0	0	0	0
Bacteria|Firmicutes|Bacilli|Bacillales|Bacillaceae|Bacillus|Bacillus cereus group|Bacillus cereus|Bacillus cereus H3081.97	0	0	1	0	0	0	0	0	0	0	0	0	0	0	0	0	0	0	0	0	0	0
Bacteria|Firmicutes|Bacilli|Bacillales|Bacillaceae|Bacillus|Bacillus cereus group|Bacillus cereus|Bacillus cereus m1293	5	0	4	0	0	0	0	14	0	0	1	0	0	0	0	0	0	0	0	0	0	0
Bacteria|Firmicutes|Bacilli|Bacillales|Bacillaceae|Bacillus|Bacillus cereus group|Bacillus cereus|Bacillus cereus m1550	0	0	0	0	0	0	0	0	0	0	0	0	0	0	0	0	0	0	0	0	0	0
Bacteria|Firmicutes|Bacilli|Bacillales|Bacillaceae|Bacillus|Bacillus cereus group|Bacillus cereus|Bacillus cereus MM3	0	0	0	0	0	0	0	0	0	0	0	0	0	0	0	0	0	0	0	0	0	0
Bacteria|Firmicutes|Bacilli|Bacillales|Bacillaceae|Bacillus|Bacillus cereus group|Bacillus cereus|Bacillus cereus NC7401	0	0	0	0	0	0	0	0	0	0	0	0	0	0	0	0	0	0	0	0	0	0
Bacteria|Firmicutes|Bacilli|Bacillales|Bacillaceae|Bacillus|Bacillus cereus group|Bacillus cereus|Bacillus cereus NVH0597-99	0	0	0	0	0	0	0	0	0	0	0	0	0	0	0	0	0	0	0	0	0	0
Bacteria|Firmicutes|Bacilli|Bacillales|Bacillaceae|Bacillus|Bacillus cereus group|Bacillus cereus|Bacillus cereus Q1	0	0	0	0	0	0	0	0	0	0	0	0	0	0	0	0	0	0	0	0	0	0
Bacteria|Firmicutes|Bacilli|Bacillales|Bacillaceae|Bacillus|Bacillus cereus group|Bacillus cereus|Bacillus cereus R309803	0	0	1	0	0	0	0	0	0	0	0	1	0	0	0	0	0	0	0	0	0	0
Bacteria|Firmicutes|Bacilli|Bacillales|Bacillaceae|Bacillus|Bacillus cereus group|Bacillus cereus|Bacillus cereus Rock1-15	0	0	0	0	0	0	0	0	0	0	0	0	0	0	0	0	0	0	0	0	0	0
Bacteria|Firmicutes|Bacilli|Bacillales|Bacillaceae|Bacillus|Bacillus cereus group|Bacillus cereus|Bacillus cereus Rock1-3	0	0	0	0	0	0	0	0	0	0	0	0	0	0	0	0	0	0	0	0	0	0
Bacteria|Firmicutes|Bacilli|Bacillales|Bacillaceae|Bacillus|Bacillus cereus group|Bacillus cereus|Bacillus cereus Rock3-28	53	21	9	1	6	3	3	19	2	7	23	8	4	17	5	0	11	5	11	2	0	0
Bacteria|Firmicutes|Bacilli|Bacillales|Bacillaceae|Bacillus|Bacillus cereus group|Bacillus cereus|Bacillus cereus Rock3-29	0	0	0	0	0	0	0	0	0	0	0	0	0	0	0	0	0	0	0	0	0	0
Bacteria|Firmicutes|Bacilli|Bacillales|Bacillaceae|Bacillus|Bacillus cereus group|Bacillus cereus|Bacillus cereus Rock3-42	0	0	0	0	0	0	0	0	0	0	0	0	0	0	0	0	0	0	0	0	0	0
Bacteria|Firmicutes|Bacilli|Bacillales|Bacillaceae|Bacillus|Bacillus cereus group|Bacillus cereus|Bacillus cereus Rock3-44	0	0	0	0	0	0	0	0	0	0	0	0	0	0	0	0	0	0	0	0	0	0
Bacteria|Firmicutes|Bacilli|Bacillales|Bacillaceae|Bacillus|Bacillus cereus group|Bacillus cereus|Bacillus cereus Rock4-18	0	0	0	0	0	0	0	0	0	0	0	0	0	0	0	0	0	0	0	0	0	0
Bacteria|Firmicutes|Bacilli|Bacillales|Bacillaceae|Bacillus|Bacillus cereus group|Bacillus cereus|Bacillus cereus Rock4-2	0	0	0	0	0	0	0	0	0	0	0	0	0	0	0	0	0	0	0	0	0	0
Bacteria|Firmicutes|Bacilli|Bacillales|Bacillaceae|Bacillus|Bacillus cereus group|Bacillus cereus|Bacillus cereus SJ1	0	0	0	0	0	0	0	0	0	0	0	0	0	0	0	0	0	0	0	0	0	0
Bacteria|Firmicutes|Bacilli|Bacillales|Bacillaceae|Bacillus|Bacillus cereus group|Bacillus cereus|Bacillus cereus W	0	0	0	0	0	0	0	0	0	0	0	0	0	0	0	0	1	0	0	0	0	0
Bacteria|Firmicutes|Bacilli|Bacillales|Bacillaceae|Bacillus|Bacillus cereus group|Bacillus cytotoxicus|Bacillus cytotoxicus NVH 391-98	0	0	0	0	0	0	0	0	0	0	0	0	0	0	0	0	0	0	0	0	0	0
Bacteria|Firmicutes|Bacilli|Bacillales|Bacillaceae|Bacillus|Bacillus cereus group|Bacillus mycoides|Bacillus mycoides DSM 2048	0	0	0	0	0	0	0	0	0	0	0	0	0	0	0	0	0	0	0	0	0	0
Bacteria|Firmicutes|Bacilli|Bacillales|Bacillaceae|Bacillus|Bacillus cereus group|Bacillus mycoides|Bacillus mycoides Rock1-4	0	0	0	0	0	0	0	0	0	0	0	0	0	0	0	0	0	0	0	0	0	0
Bacteria|Firmicutes|Bacilli|Bacillales|Bacillaceae|Bacillus|Bacillus cereus group|Bacillus mycoides|Bacillus mycoides Rock3-17	0	0	0	0	0	0	0	0	0	0	0	0	0	0	0	0	0	0	0	0	0	0
Bacteria|Firmicutes|Bacilli|Bacillales|Bacillaceae|Bacillus|Bacillus cereus group|Bacillus sp. 7_6_55CFAA_CT2	0	0	0	0	0	0	0	0	0	0	0	0	0	0	0	0	1	0	0	0	0	0
Bacteria|Firmicutes|Bacilli|Bacillales|Bacillaceae|Bacillus|Bacillus cereus group|Bacillus thuringiensis|Bacillus thuringiensis Bt407	0	0	0	0	0	0	0	0	0	0	0	0	0	0	0	0	0	0	0	0	0	0
Bacteria|Firmicutes|Bacilli|Bacillales|Bacillaceae|Bacillus|Bacillus cereus group|Bacillus thuringiensis|Bacillus thuringiensis IBL 200	0	0	0	0	0	0	0	0	0	0	0	0	0	0	0	0	0	0	0	0	0	0
Bacteria|Firmicutes|Bacilli|Bacillales|Bacillaceae|Bacillus|Bacillus cereus group|Bacillus thuringiensis|Bacillus thuringiensis IBL 4222	3	2	0	0	0	0	0	0	0	0	0	0	0	0	0	0	0	0	0	0	0	0
Bacteria|Firmicutes|Bacilli|Bacillales|Bacillaceae|Bacillus|Bacillus cereus group|Bacillus thuringiensis|Bacillus thuringiensis serovar andalousiensis|Bacillus thuringiensis serovar andalousiensis BGSC 4AW1	0	0	0	0	0	0	0	0	0	0	0	0	0	0	0	0	0	0	0	0	0	0
Bacteria|Firmicutes|Bacilli|Bacillales|Bacillaceae|Bacillus|Bacillus cereus group|Bacillus thuringiensis|Bacillus thuringiensis serovar berliner|Bacillus thuringiensis serovar berliner ATCC 10792	0	0	0	0	0	0	0	0	0	0	0	0	0	0	0	0	0	0	0	0	0	0
Bacteria|Firmicutes|Bacilli|Bacillales|Bacillaceae|Bacillus|Bacillus cereus group|Bacillus thuringiensis|Bacillus thuringiensis serovar chinensis|Bacillus thuringiensis serovar chinensis CT-43	0	0	0	0	0	0	0	0	0	0	0	0	0	0	0	0	0	0	0	0	0	0
Bacteria|Firmicutes|Bacilli|Bacillales|Bacillaceae|Bacillus|Bacillus cereus group|Bacillus thuringiensis|Bacillus thuringiensis serovar finitimus|Bacillus thuringiensis serovar finitimus YBT-020	0	0	0	0	0	0	0	0	0	0	0	0	0	0	0	0	0	0	0	0	0	0
Bacteria|Firmicutes|Bacilli|Bacillales|Bacillaceae|Bacillus|Bacillus cereus group|Bacillus thuringiensis|Bacillus thuringiensis serovar huazhongensis|Bacillus thuringiensis serovar huazhongensis BGSC 4BD1	0	0	0	0	0	0	0	0	0	0	0	0	0	0	0	0	0	0	0	0	0	0
Bacteria|Firmicutes|Bacilli|Bacillales|Bacillaceae|Bacillus|Bacillus cereus group|Bacillus thuringiensis|Bacillus thuringiensis serovar israelensis|Bacillus thuringiensis serovar israelensis ATCC 35646	0	0	0	0	0	0	0	0	0	0	0	0	0	0	0	0	0	0	0	0	0	0
Bacteria|Firmicutes|Bacilli|Bacillales|Bacillaceae|Bacillus|Bacillus cereus group|Bacillus thuringiensis|Bacillus thuringiensis serovar konkukian|Bacillus thuringiensis serovar konkukian str. 97-27	0	0	0	0	0	0	0	0	0	0	0	0	0	0	0	0	0	0	0	0	0	0
Bacteria|Firmicutes|Bacilli|Bacillales|Bacillaceae|Bacillus|Bacillus cereus group|Bacillus thuringiensis|Bacillus thuringiensis serovar kurstaki|Bacillus thuringiensis BMB171	0	0	0	0	0	0	0	0	0	0	0	0	0	0	0	0	0	0	0	0	0	0
Bacteria|Firmicutes|Bacilli|Bacillales|Bacillaceae|Bacillus|Bacillus cereus group|Bacillus thuringiensis|Bacillus thuringiensis serovar kurstaki|Bacillus thuringiensis serovar kurstaki str. T03a001	0	0	0	0	0	0	0	0	0	0	0	0	0	0	0	0	0	0	0	0	0	0
Bacteria|Firmicutes|Bacilli|Bacillales|Bacillaceae|Bacillus|Bacillus cereus group|Bacillus thuringiensis|Bacillus thuringiensis serovar monterrey|Bacillus thuringiensis serovar monterrey BGSC 4AJ1	0	0	0	0	0	0	0	0	0	0	0	0	0	0	0	0	0	0	0	0	0	0
Bacteria|Firmicutes|Bacilli|Bacillales|Bacillaceae|Bacillus|Bacillus cereus group|Bacillus thuringiensis|Bacillus thuringiensis serovar pakistani|Bacillus thuringiensis serovar pakistani str. T13001	0	0	0	0	0	0	0	0	0	0	0	0	0	0	0	0	0	0	0	0	0	0
Bacteria|Firmicutes|Bacilli|Bacillales|Bacillaceae|Bacillus|Bacillus cereus group|Bacillus thuringiensis|Bacillus thuringiensis serovar pondicheriensis|Bacillus thuringiensis serovar pondicheriensis BGSC 4BA1	0	0	0	0	0	0	0	0	0	0	0	0	0	0	0	0	0	0	0	0	0	0
Bacteria|Firmicutes|Bacilli|Bacillales|Bacillaceae|Bacillus|Bacillus cereus group|Bacillus thuringiensis|Bacillus thuringiensis serovar pulsiensis|Bacillus thuringiensis serovar pulsiensis BGSC 4CC1	0	0	0	0	0	0	0	0	0	0	0	0	0	0	0	0	0	0	0	0	0	0
Bacteria|Firmicutes|Bacilli|Bacillales|Bacillaceae|Bacillus|Bacillus cereus group|Bacillus thuringiensis|Bacillus thuringiensis serovar sotto|Bacillus thuringiensis serovar sotto str. T04001	0	0	0	0	0	0	0	0	0	0	0	0	0	0	0	0	0	0	0	0	0	0
Bacteria|Firmicutes|Bacilli|Bacillales|Bacillaceae|Bacillus|Bacillus cereus group|Bacillus thuringiensis|Bacillus thuringiensis serovar thuringiensis|Bacillus thuringiensis serovar thuringiensis str. T01001	0	0	0	0	0	0	0	0	0	0	0	0	0	0	0	0	0	0	0	0	0	0
Bacteria|Firmicutes|Bacilli|Bacillales|Bacillaceae|Bacillus|Bacillus cereus group|Bacillus thuringiensis|Bacillus thuringiensis serovar tochigiensis|Bacillus thuringiensis serovar tochigiensis BGSC 4Y1	0	0	0	0	0	0	0	0	0	0	0	0	0	0	0	0	0	0	0	0	0	0
Bacteria|Firmicutes|Bacilli|Bacillales|Bacillaceae|Bacillus|Bacillus cereus group|Bacillus thuringiensis|Bacillus thuringiensis str. Al Hakam	0	0	0	0	0	0	0	0	0	0	0	0	0	0	0	0	0	0	0	0	0	0
Bacteria|Firmicutes|Bacilli|Bacillales|Bacillaceae|Bacillus|Bacillus cereus group|Bacillus weihenstephanensis|Bacillus weihenstephanensis KBAB4	0	0	0	0	0	0	0	0	0	0	0	0	0	0	0	0	0	0	0	0	0	0
Bacteria|Firmicutes|Bacilli|Bacillales|Bacillaceae|Bacillus|Bacillus clausii|Bacillus clausii KSM-K16	2	3	4	1	4	0	0	3	0	0	0	1	0	0	0	0	0	0	0	3	0	0
Bacteria|Firmicutes|Bacilli|Bacillales|Bacillaceae|Bacillus|Bacillus coagulans|Bacillus coagulans 2-6	0	0	0	0	0	0	0	0	0	0	0	0	0	0	0	0	0	0	0	0	0	0
Bacteria|Firmicutes|Bacilli|Bacillales|Bacillaceae|Bacillus|Bacillus coagulans|Bacillus coagulans 36D1	0	0	0	0	0	0	0	0	0	0	0	0	0	0	0	0	0	0	0	0	0	0
Bacteria|Firmicutes|Bacilli|Bacillales|Bacillaceae|Bacillus|Bacillus coahuilensis|Bacillus coahuilensis m4-4	0	0	0	0	0	0	0	0	0	0	0	0	0	0	0	0	0	0	0	0	0	0
Bacteria|Firmicutes|Bacilli|Bacillales|Bacillaceae|Bacillus|Bacillus halodurans|Bacillus halodurans C-125	1	0	1	0	0	0	0	1	0	0	0	0	0	1	0	0	0	0	0	0	0	0
Bacteria|Firmicutes|Bacilli|Bacillales|Bacillaceae|Bacillus|Bacillus megaterium|Bacillus megaterium DSM 319	0	0	0	0	0	0	0	0	0	0	0	0	0	0	0	0	0	0	0	0	0	0
Bacteria|Firmicutes|Bacilli|Bacillales|Bacillaceae|Bacillus|Bacillus megaterium|Bacillus megaterium QM B1551	1	0	1	0	0	0	0	0	0	0	0	0	0	0	0	0	0	0	0	0	0	0
Bacteria|Firmicutes|Bacilli|Bacillales|Bacillaceae|Bacillus|Bacillus megaterium|Bacillus megaterium WSH-002	1	0	0	0	0	0	0	2	0	0	0	0	0	0	0	0	0	0	0	0	0	0
Bacteria|Firmicutes|Bacilli|Bacillales|Bacillaceae|Bacillus|Bacillus pseudofirmus|Bacillus pseudofirmus OF4	5	1	1	1	3	1	1	1	0	0	1	0	0	0	0	0	1	1	0	0	0	0
Bacteria|Firmicutes|Bacilli|Bacillales|Bacillaceae|Bacillus|Bacillus pseudomycoides|Bacillus pseudomycoides DSM 12442	0	0	0	0	0	0	0	0	0	0	0	0	0	0	0	0	0	0	0	0	0	0
Bacteria|Firmicutes|Bacilli|Bacillales|Bacillaceae|Bacillus|Bacillus pumilus|Bacillus pumilus ATCC 7061	0	0	0	0	0	0	0	0	0	0	0	0	0	0	0	0	0	0	0	0	0	0
Bacteria|Firmicutes|Bacilli|Bacillales|Bacillaceae|Bacillus|Bacillus pumilus|Bacillus pumilus SAFR-032	0	0	0	1	0	0	0	1	0	0	0	1	0	0	0	0	0	0	0	0	0	0
Bacteria|Firmicutes|Bacilli|Bacillales|Bacillaceae|Bacillus|Bacillus selenitireducens|Bacillus selenitireducens MLS10	0	0	0	0	0	0	0	0	0	0	0	0	0	0	0	0	0	0	0	0	0	0
Bacteria|Firmicutes|Bacilli|Bacillales|Bacillaceae|Bacillus|Bacillus smithii|Bacillus smithii 7_3_47FAA	0	1	0	1	0	0	0	1	0	0	0	0	0	0	0	0	0	1	0	0	0	0
Bacteria|Firmicutes|Bacilli|Bacillales|Bacillaceae|Bacillus|Bacillus sp. 1NLA3E	0	0	0	0	0	0	0	0	0	0	0	0	0	0	0	0	0	0	0	0	0	0
Bacteria|Firmicutes|Bacilli|Bacillales|Bacillaceae|Bacillus|Bacillus sp. 2_A_57_CT2	0	0	0	1	0	0	0	0	0	0	0	0	0	0	0	0	1	0	0	0	0	0
Bacteria|Firmicutes|Bacilli|Bacillales|Bacillaceae|Bacillus|Bacillus sp. 5B6	0	0	0	0	0	0	0	0	0	0	0	0	0	0	0	0	0	0	0	0	0	0
Bacteria|Firmicutes|Bacilli|Bacillales|Bacillaceae|Bacillus|Bacillus sp. B14905	0	0	0	0	0	0	0	1	0	0	0	0	0	0	0	0	0	0	0	0	0	0
Bacteria|Firmicutes|Bacilli|Bacillales|Bacillaceae|Bacillus|Bacillus sp. BT1B_CT2	0	0	0	0	0	0	0	0	0	0	0	0	0	0	0	0	0	0	0	0	0	0
Bacteria|Firmicutes|Bacilli|Bacillales|Bacillaceae|Bacillus|Bacillus sp. JS	0	0	0	0	0	0	0	0	0	0	0	0	0	0	0	0	0	0	0	0	0	0
Bacteria|Firmicutes|Bacilli|Bacillales|Bacillaceae|Bacillus|Bacillus sp. m3-13	0	0	0	0	0	0	0	0	0	0	0	0	0	0	0	0	0	0	0	0	0	0
Bacteria|Firmicutes|Bacilli|Bacillales|Bacillaceae|Bacillus|Bacillus sp. NRRL B-14911	0	0	0	0	0	0	0	0	0	0	0	0	0	0	0	0	0	0	0	0	0	0
Bacteria|Firmicutes|Bacilli|Bacillales|Bacillaceae|Bacillus|Bacillus sp. SG-1	0	0	0	0	0	0	0	0	0	0	0	0	0	0	0	0	0	0	0	0	0	0
Bacteria|Firmicutes|Bacilli|Bacillales|Bacillaceae|Bacillus|Bacillus subtilis group|Bacillus amyloliquefaciens|Bacillus amyloliquefaciens LL3	2	2	3	1	3	0	0	0	0	0	0	0	0	0	0	0	0	0	0	0	0	0
Bacteria|Firmicutes|Bacilli|Bacillales|Bacillaceae|Bacillus|Bacillus subtilis group|Bacillus amyloliquefaciens|Bacillus amyloliquefaciens subsp. amyloliquefaciens|Bacillus amyloliquefaciens DSM 7	0	0	0	0	0	0	0	0	0	0	0	0	0	0	0	0	0	0	0	0	0	0
Bacteria|Firmicutes|Bacilli|Bacillales|Bacillaceae|Bacillus|Bacillus subtilis group|Bacillus amyloliquefaciens|Bacillus amyloliquefaciens subsp. plantarum|Bacillus amyloliquefaciens subsp. plantarum CAU B946	0	0	0	0	0	0	0	0	0	0	0	0	0	0	0	0	0	0	0	0	0	0
Bacteria|Firmicutes|Bacilli|Bacillales|Bacillaceae|Bacillus|Bacillus subtilis group|Bacillus amyloliquefaciens|Bacillus amyloliquefaciens subsp. plantarum|Bacillus amyloliquefaciens subsp. plantarum str. FZB42	0	0	0	0	0	0	0	0	0	0	0	0	0	0	0	0	0	0	0	0	0	0
Bacteria|Firmicutes|Bacilli|Bacillales|Bacillaceae|Bacillus|Bacillus subtilis group|Bacillus amyloliquefaciens|Bacillus amyloliquefaciens subsp. plantarum|Bacillus amyloliquefaciens subsp. plantarum YAU B9601-Y2	0	0	0	0	0	0	0	0	0	0	0	0	0	0	0	0	0	0	0	0	0	0
Bacteria|Firmicutes|Bacilli|Bacillales|Bacillaceae|Bacillus|Bacillus subtilis group|Bacillus amyloliquefaciens|Bacillus amyloliquefaciens TA208	0	0	0	0	0	0	0	0	0	0	0	0	0	0	0	0	0	0	0	0	0	0
Bacteria|Firmicutes|Bacilli|Bacillales|Bacillaceae|Bacillus|Bacillus subtilis group|Bacillus amyloliquefaciens|Bacillus amyloliquefaciens XH7	0	0	0	0	0	0	0	0	0	0	0	0	0	0	0	0	0	0	0	0	0	0
Bacteria|Firmicutes|Bacilli|Bacillales|Bacillaceae|Bacillus|Bacillus subtilis group|Bacillus amyloliquefaciens|Bacillus amyloliquefaciens Y2	0	0	0	0	0	0	0	0	0	0	0	0	0	0	0	0	0	0	0	0	0	0
Bacteria|Firmicutes|Bacilli|Bacillales|Bacillaceae|Bacillus|Bacillus subtilis group|Bacillus atrophaeus|Bacillus atrophaeus 1942	0	0	0	0	0	0	0	0	0	0	0	0	0	0	0	0	0	0	0	0	0	0
Bacteria|Firmicutes|Bacilli|Bacillales|Bacillaceae|Bacillus|Bacillus subtilis group|Bacillus licheniformis|Bacillus licheniformis DSM 13 = ATCC 14580	0	1	0	0	0	0	0	0	0	0	0	0	0	0	0	0	0	0	0	0	0	0
Bacteria|Firmicutes|Bacilli|Bacillales|Bacillaceae|Bacillus|Bacillus subtilis group|Bacillus subtilis|Bacillus subtilis BSn5	0	0	0	0	0	0	0	0	0	0	0	0	0	0	0	0	0	0	0	0	0	0
Bacteria|Firmicutes|Bacilli|Bacillales|Bacillaceae|Bacillus|Bacillus subtilis group|Bacillus subtilis|Bacillus subtilis subsp. spizizenii|Bacillus subtilis subsp. spizizenii ATCC 6633	0	0	0	0	0	0	0	0	0	0	0	0	0	0	0	0	0	0	0	0	0	0
Bacteria|Firmicutes|Bacilli|Bacillales|Bacillaceae|Bacillus|Bacillus subtilis group|Bacillus subtilis|Bacillus subtilis subsp. spizizenii|Bacillus subtilis subsp. spizizenii str. W23	0	0	0	0	0	0	0	0	0	0	0	0	0	0	0	0	0	0	0	0	0	0
Bacteria|Firmicutes|Bacilli|Bacillales|Bacillaceae|Bacillus|Bacillus subtilis group|Bacillus subtilis|Bacillus subtilis subsp. spizizenii|Bacillus subtilis subsp. spizizenii TU-B-10	0	0	0	0	0	0	0	0	0	0	0	0	0	0	0	0	0	0	0	0	0	0
Bacteria|Firmicutes|Bacilli|Bacillales|Bacillaceae|Bacillus|Bacillus subtilis group|Bacillus subtilis|Bacillus subtilis subsp. subtilis|Bacillus subtilis subsp. subtilis str. 168	0	0	0	0	0	0	0	0	0	0	0	0	0	0	0	0	0	0	0	0	0	0
Bacteria|Firmicutes|Bacilli|Bacillales|Bacillaceae|Bacillus|Bacillus subtilis group|Bacillus subtilis|Bacillus subtilis subsp. subtilis|Bacillus subtilis subsp. subtilis str. JH642	0	0	0	0	0	0	0	0	0	0	0	0	0	0	0	0	0	0	0	0	0	0
Bacteria|Firmicutes|Bacilli|Bacillales|Bacillaceae|Bacillus|Bacillus subtilis group|Bacillus subtilis|Bacillus subtilis subsp. subtilis|Bacillus subtilis subsp. subtilis str. NCIB 3610	0	0	0	0	0	0	0	0	0	0	0	0	0	0	0	0	1	0	0	0	0	0
Bacteria|Firmicutes|Bacilli|Bacillales|Bacillaceae|Bacillus|Bacillus subtilis group|Bacillus subtilis|Bacillus subtilis subsp. subtilis|Bacillus subtilis subsp. subtilis str. RO-NN-1	0	0	1	0	0	0	0	0	0	0	0	0	0	0	0	0	0	0	0	0	0	0
Bacteria|Firmicutes|Bacilli|Bacillales|Bacillaceae|Bacillus|Bacillus subtilis group|Bacillus subtilis|Bacillus subtilis subsp. subtilis|Bacillus subtilis subsp. subtilis str. SMY	0	0	0	0	0	0	0	0	0	0	0	0	0	0	0	0	0	0	0	0	0	0
Bacteria|Firmicutes|Bacilli|Bacillales|Bacillaceae|Caldalkalibacillus|Caldalkalibacillus thermarum|Caldalkalibacillus thermarum TA2.A1	0	0	0	0	0	0	0	0	0	0	0	0	0	0	0	0	0	0	0	0	0	0
Bacteria|Firmicutes|Bacilli|Bacillales|Bacillaceae|Geobacillus|Geobacillus kaustophilus|Geobacillus kaustophilus HTA426	0	0	0	0	0	0	0	0	0	0	0	0	0	0	0	0	0	0	0	0	0	0
Bacteria|Firmicutes|Bacilli|Bacillales|Bacillaceae|Geobacillus|Geobacillus sp. C56-T3	0	0	0	0	0	0	0	0	0	0	0	0	0	0	0	0	0	0	0	0	0	0
Bacteria|Firmicutes|Bacilli|Bacillales|Bacillaceae|Geobacillus|Geobacillus sp. G11MC16	0	0	0	0	0	0	0	0	0	0	0	0	0	0	0	0	0	0	0	0	0	0
Bacteria|Firmicutes|Bacilli|Bacillales|Bacillaceae|Geobacillus|Geobacillus sp. WCH70	0	0	0	0	0	0	0	0	0	0	0	0	0	0	0	0	0	0	0	0	0	0
Bacteria|Firmicutes|Bacilli|Bacillales|Bacillaceae|Geobacillus|Geobacillus sp. Y4.1MC1	0	0	0	0	0	0	0	0	0	0	0	0	0	0	0	0	0	0	0	0	0	0
Bacteria|Firmicutes|Bacilli|Bacillales|Bacillaceae|Geobacillus|Geobacillus sp. Y412MC52	0	0	0	0	0	0	0	0	0	0	0	0	0	0	0	0	0	0	0	0	0	0
Bacteria|Firmicutes|Bacilli|Bacillales|Bacillaceae|Geobacillus|Geobacillus sp. Y412MC61	0	0	0	0	0	0	0	0	0	0	0	0	0	0	0	0	0	0	0	0	0	0
Bacteria|Firmicutes|Bacilli|Bacillales|Bacillaceae|Geobacillus|Geobacillus thermodenitrificans|Geobacillus thermodenitrificans NG80-2	0	0	0	0	0	0	0	0	0	0	0	0	0	0	0	0	0	0	0	0	0	0
Bacteria|Firmicutes|Bacilli|Bacillales|Bacillaceae|Geobacillus|Geobacillus thermoglucosidasius|Geobacillus thermoglucosidasius C56-YS93	0	0	0	0	0	0	0	0	0	0	0	0	0	0	0	0	0	0	0	0	0	0
Bacteria|Firmicutes|Bacilli|Bacillales|Bacillaceae|Geobacillus|Geobacillus thermoleovorans group|Geobacillus thermoleovorans|Geobacillus thermoleovorans CCB_US3_UF5	0	0	0	0	0	0	0	0	0	0	0	0	0	0	0	0	0	0	0	0	0	0
Bacteria|Firmicutes|Bacilli|Bacillales|Bacillaceae|Halobacillus|Halobacillus halophilus|Halobacillus halophilus DSM 2266	0	0	0	0	0	0	0	0	0	0	0	0	0	0	0	0	0	0	0	0	0	0
Bacteria|Firmicutes|Bacilli|Bacillales|Bacillaceae|Lentibacillus|Lentibacillus jeotgali	0	0	0	0	0	0	0	0	0	0	0	0	0	0	0	0	0	0	0	0	0	0
Bacteria|Firmicutes|Bacilli|Bacillales|Bacillaceae|Lysinibacillus|Lysinibacillus fusiformis|Lysinibacillus fusiformis ZC1	1	0	0	0	0	0	0	0	0	0	0	1	0	0	0	0	0	0	0	0	0	0
Bacteria|Firmicutes|Bacilli|Bacillales|Bacillaceae|Lysinibacillus|Lysinibacillus sphaericus|Lysinibacillus sphaericus C3-41	0	0	0	0	0	0	0	0	0	0	0	0	0	0	0	0	0	0	0	0	0	0
Bacteria|Firmicutes|Bacilli|Bacillales|Bacillaceae|Oceanobacillus|Oceanobacillus iheyensis|Oceanobacillus iheyensis HTE831	1	1	1	1	0	0	0	0	0	0	0	0	0	0	0	0	0	0	0	0	0	0
Bacteria|Firmicutes|Bacilli|Bacillales|Bacillaceae|Ornithinibacillus|Ornithinibacillus scapharcae|Ornithinibacillus scapharcae TW25	0	0	0	0	0	0	0	0	0	0	0	0	0	0	0	0	0	0	0	0	0	0
Bacteria|Firmicutes|Bacilli|Bacillales|Bacillales incertae sedis|Bacillales Family XI. Incertae Sedis|Gemella|Gemella haemolysans|Gemella haemolysans ATCC 10379	0	0	0	0	0	0	0	0	0	0	0	0	0	0	0	0	0	0	0	0	0	0
Bacteria|Firmicutes|Bacilli|Bacillales|Bacillales incertae sedis|Bacillales Family XI. Incertae Sedis|Gemella|Gemella haemolysans|Gemella haemolysans M341	0	0	0	0	0	0	0	0	0	0	0	0	0	0	0	0	0	0	0	0	0	0
Bacteria|Firmicutes|Bacilli|Bacillales|Bacillales incertae sedis|Bacillales Family XI. Incertae Sedis|Gemella|Gemella morbillorum|Gemella morbillorum M424	1	0	0	0	0	0	0	0	0	0	0	0	0	0	0	0	0	0	0	0	0	0
Bacteria|Firmicutes|Bacilli|Bacillales|Bacillales incertae sedis|Bacillales Family XI. Incertae Sedis|Gemella|Gemella sanguinis|Gemella sanguinis M325	0	0	0	0	0	0	0	0	0	0	0	0	0	0	0	0	0	0	0	0	0	0
Bacteria|Firmicutes|Bacilli|Bacillales|Bacillales incertae sedis|Bacillales Family XII. Incertae Sedis|Exiguobacterium|Exiguobacterium sibiricum|Exiguobacterium sibiricum 255-15	1	3	0	1	3	2	3	3	1	18	3	74	2	0	0	0	1	2	0	0	0	0
Bacteria|Firmicutes|Bacilli|Bacillales|Bacillales incertae sedis|Bacillales Family XII. Incertae Sedis|Exiguobacterium|Exiguobacterium sp. AT1b	103	24	46	46	17	1	2	99	0	16	169	88	5	11	2	3	42	27	10	1	0	1
Bacteria|Firmicutes|Bacilli|Bacillales|Listeriaceae|Listeria|Listeria fleischmannii|Listeria fleischmannii subsp. coloradonensis	0	0	0	0	0	0	0	0	0	0	0	0	0	0	0	0	0	0	0	0	0	0
Bacteria|Firmicutes|Bacilli|Bacillales|Listeriaceae|Listeria|Listeria grayi|Listeria grayi DSM 20601	0	0	0	0	0	0	0	0	0	0	0	0	0	0	0	0	0	0	0	0	0	0
Bacteria|Firmicutes|Bacilli|Bacillales|Listeriaceae|Listeria|Listeria innocua|Listeria innocua ATCC 33091	0	0	0	0	0	0	0	0	0	0	0	0	0	0	0	0	0	0	0	0	0	0
Bacteria|Firmicutes|Bacilli|Bacillales|Listeriaceae|Listeria|Listeria innocua|Listeria innocua Clip11262	0	0	0	0	0	0	0	0	0	0	0	0	0	0	0	0	0	0	0	0	0	0
Bacteria|Firmicutes|Bacilli|Bacillales|Listeriaceae|Listeria|Listeria ivanovii|Listeria ivanovii FSL F6-596	0	0	0	0	0	0	0	0	0	0	0	0	0	0	0	0	0	0	0	0	0	0
Bacteria|Firmicutes|Bacilli|Bacillales|Listeriaceae|Listeria|Listeria ivanovii|Listeria ivanovii subsp. ivanovii|Listeria ivanovii subsp. ivanovii PAM 55	0	0	0	0	0	0	0	0	0	0	0	0	0	0	0	0	0	0	0	0	0	0
Bacteria|Firmicutes|Bacilli|Bacillales|Listeriaceae|Listeria|Listeria marthii|Listeria marthii FSL S4-120	0	0	0	0	0	0	0	0	0	0	0	0	0	0	0	0	0	0	0	0	0	0
Bacteria|Firmicutes|Bacilli|Bacillales|Listeriaceae|Listeria|Listeria monocytogenes	0	0	0	0	0	0	0	0	0	0	0	0	0	0	0	0	0	0	0	0	0	0
Bacteria|Firmicutes|Bacilli|Bacillales|Listeriaceae|Listeria|Listeria monocytogenes|Listeria monocytogenes 07PF0776	0	0	0	0	0	0	0	0	0	0	0	0	0	0	0	0	0	0	0	0	0	0
Bacteria|Firmicutes|Bacilli|Bacillales|Listeriaceae|Listeria|Listeria monocytogenes|Listeria monocytogenes 08-5578	0	0	0	0	0	0	0	0	0	0	0	0	0	0	0	0	0	0	0	0	0	0
Bacteria|Firmicutes|Bacilli|Bacillales|Listeriaceae|Listeria|Listeria monocytogenes|Listeria monocytogenes 08-5923	0	0	0	0	0	0	0	0	0	0	0	0	0	0	0	0	0	0	0	0	0	0
Bacteria|Firmicutes|Bacilli|Bacillales|Listeriaceae|Listeria|Listeria monocytogenes|Listeria monocytogenes 10403S	0	0	0	0	0	0	0	0	0	0	0	0	0	0	0	0	0	0	0	0	0	0
Bacteria|Firmicutes|Bacilli|Bacillales|Listeriaceae|Listeria|Listeria monocytogenes|Listeria monocytogenes EGD-e	0	0	1	0	0	0	0	0	0	0	0	0	0	0	0	0	0	0	0	0	0	0
Bacteria|Firmicutes|Bacilli|Bacillales|Listeriaceae|Listeria|Listeria monocytogenes|Listeria monocytogenes F6900	0	0	0	0	0	0	0	0	0	0	0	0	0	0	0	0	0	0	0	0	0	0
Bacteria|Firmicutes|Bacilli|Bacillales|Listeriaceae|Listeria|Listeria monocytogenes|Listeria monocytogenes Finland 1998	0	0	0	0	0	0	0	0	0	0	0	0	0	0	0	0	0	0	0	0	0	0
Bacteria|Firmicutes|Bacilli|Bacillales|Listeriaceae|Listeria|Listeria monocytogenes|Listeria monocytogenes FSL F2-208	0	0	0	0	0	0	0	0	0	0	0	0	0	0	0	0	0	0	0	0	0	0
Bacteria|Firmicutes|Bacilli|Bacillales|Listeriaceae|Listeria|Listeria monocytogenes|Listeria monocytogenes FSL F2-515	0	0	0	0	0	0	0	0	0	0	0	0	0	0	0	0	0	0	0	0	0	0
Bacteria|Firmicutes|Bacilli|Bacillales|Listeriaceae|Listeria|Listeria monocytogenes|Listeria monocytogenes FSL J1-175	0	0	0	0	0	0	0	0	0	0	0	0	0	0	0	0	0	0	0	0	0	0
Bacteria|Firmicutes|Bacilli|Bacillales|Listeriaceae|Listeria|Listeria monocytogenes|Listeria monocytogenes FSL J1-194	0	0	0	0	0	0	0	0	0	0	0	0	0	0	0	0	0	0	0	0	0	0
Bacteria|Firmicutes|Bacilli|Bacillales|Listeriaceae|Listeria|Listeria monocytogenes|Listeria monocytogenes FSL J1-208	0	0	0	0	0	0	0	0	0	0	0	0	0	0	0	0	0	0	0	0	0	0
Bacteria|Firmicutes|Bacilli|Bacillales|Listeriaceae|Listeria|Listeria monocytogenes|Listeria monocytogenes FSL J2-003	0	0	0	0	0	0	0	0	0	0	0	0	0	0	0	0	0	0	0	0	0	0
Bacteria|Firmicutes|Bacilli|Bacillales|Listeriaceae|Listeria|Listeria monocytogenes|Listeria monocytogenes FSL J2-064	0	0	0	0	0	0	0	0	0	0	0	0	0	0	0	0	0	0	0	0	0	0
Bacteria|Firmicutes|Bacilli|Bacillales|Listeriaceae|Listeria|Listeria monocytogenes|Listeria monocytogenes FSL J2-071	0	0	0	0	0	0	0	0	0	0	0	0	0	0	0	0	0	0	0	0	0	0
Bacteria|Firmicutes|Bacilli|Bacillales|Listeriaceae|Listeria|Listeria monocytogenes|Listeria monocytogenes FSL N1-017	0	0	0	0	0	0	0	0	0	0	0	0	0	0	0	0	0	0	0	0	0	0
Bacteria|Firmicutes|Bacilli|Bacillales|Listeriaceae|Listeria|Listeria monocytogenes|Listeria monocytogenes FSL N3-165	0	0	0	0	0	0	0	0	0	0	0	0	0	0	0	0	0	0	0	0	0	0
Bacteria|Firmicutes|Bacilli|Bacillales|Listeriaceae|Listeria|Listeria monocytogenes|Listeria monocytogenes FSL R2-503	0	0	0	0	0	0	0	0	0	0	0	0	0	0	0	0	0	0	0	0	0	0
Bacteria|Firmicutes|Bacilli|Bacillales|Listeriaceae|Listeria|Listeria monocytogenes|Listeria monocytogenes FSL R2-561	0	0	0	0	0	0	0	0	0	0	0	0	0	0	0	0	0	0	0	0	0	0
Bacteria|Firmicutes|Bacilli|Bacillales|Listeriaceae|Listeria|Listeria monocytogenes|Listeria monocytogenes HCC23	0	0	0	0	0	0	0	0	0	0	0	0	0	0	0	0	0	0	0	0	0	0
Bacteria|Firmicutes|Bacilli|Bacillales|Listeriaceae|Listeria|Listeria monocytogenes|Listeria monocytogenes HPB2262	0	0	0	0	0	0	0	0	0	0	0	0	0	0	0	0	0	0	0	0	0	0
Bacteria|Firmicutes|Bacilli|Bacillales|Listeriaceae|Listeria|Listeria monocytogenes|Listeria monocytogenes J0161	0	0	0	0	0	0	0	0	0	0	0	0	0	0	0	0	0	0	0	0	0	0
Bacteria|Firmicutes|Bacilli|Bacillales|Listeriaceae|Listeria|Listeria monocytogenes|Listeria monocytogenes J1-220	0	0	0	0	0	0	0	0	0	0	0	0	0	0	0	0	0	0	0	0	0	0
Bacteria|Firmicutes|Bacilli|Bacillales|Listeriaceae|Listeria|Listeria monocytogenes|Listeria monocytogenes J1816	0	0	0	0	0	0	0	0	0	0	0	0	0	0	0	0	0	0	0	0	0	0
Bacteria|Firmicutes|Bacilli|Bacillales|Listeriaceae|Listeria|Listeria monocytogenes|Listeria monocytogenes J2818	0	0	0	0	0	0	0	0	0	0	0	0	0	0	0	0	0	0	0	0	0	0
Bacteria|Firmicutes|Bacilli|Bacillales|Listeriaceae|Listeria|Listeria monocytogenes|Listeria monocytogenes L99	0	0	0	0	0	0	0	0	0	0	0	0	0	0	0	0	0	0	0	0	0	0
Bacteria|Firmicutes|Bacilli|Bacillales|Listeriaceae|Listeria|Listeria monocytogenes|Listeria monocytogenes LO28	0	0	0	0	0	0	0	0	0	0	0	0	0	0	0	0	0	0	0	0	0	0
Bacteria|Firmicutes|Bacilli|Bacillales|Listeriaceae|Listeria|Listeria monocytogenes|Listeria monocytogenes M7	0	0	0	0	0	0	0	0	0	0	0	0	0	0	0	0	0	0	0	0	0	0
Bacteria|Firmicutes|Bacilli|Bacillales|Listeriaceae|Listeria|Listeria monocytogenes|Listeria monocytogenes serotype 1/2a str. F6854	0	0	0	0	0	0	0	0	0	0	0	0	0	0	0	0	0	0	0	0	0	0
Bacteria|Firmicutes|Bacilli|Bacillales|Listeriaceae|Listeria|Listeria monocytogenes|Listeria monocytogenes serotype 4b str. CLIP 80459	0	0	0	0	0	0	0	0	0	0	0	0	0	0	0	0	0	0	0	0	0	0
Bacteria|Firmicutes|Bacilli|Bacillales|Listeriaceae|Listeria|Listeria monocytogenes|Listeria monocytogenes serotype 4b str. F2365	0	0	0	0	0	0	0	0	0	0	0	0	0	0	0	0	0	0	0	0	0	0
Bacteria|Firmicutes|Bacilli|Bacillales|Listeriaceae|Listeria|Listeria monocytogenes|Listeria monocytogenes serotype 4b str. H7858	3	0	5	0	1	0	0	5	0	0	0	9	1	1	1	0	0	0	0	0	0	0
Bacteria|Firmicutes|Bacilli|Bacillales|Listeriaceae|Listeria|Listeria monocytogenes|Listeria monocytogenes serotype 7 str. SLCC2482	0	0	0	0	0	0	0	0	0	0	0	0	0	0	0	0	0	0	0	0	0	0
Bacteria|Firmicutes|Bacilli|Bacillales|Listeriaceae|Listeria|Listeria monocytogenes|Listeria monocytogenes SLCC2372	0	0	0	0	0	0	0	0	0	0	0	0	0	0	0	0	0	0	0	0	0	0
Bacteria|Firmicutes|Bacilli|Bacillales|Listeriaceae|Listeria|Listeria monocytogenes|Listeria monocytogenes SLCC2376	0	0	0	0	0	0	0	0	0	0	0	0	0	0	0	0	0	0	0	0	0	0
Bacteria|Firmicutes|Bacilli|Bacillales|Listeriaceae|Listeria|Listeria monocytogenes|Listeria monocytogenes SLCC2755	0	0	0	0	0	0	0	0	0	0	0	0	0	0	0	0	0	0	0	0	0	0
Bacteria|Firmicutes|Bacilli|Bacillales|Listeriaceae|Listeria|Listeria monocytogenes|Listeria monocytogenes SLCC5850	0	0	0	0	0	0	0	0	0	0	0	0	0	0	0	0	0	0	0	0	0	0
Bacteria|Firmicutes|Bacilli|Bacillales|Listeriaceae|Listeria|Listeria monocytogenes|Listeria monocytogenes SLCC7179	0	0	0	0	0	0	0	0	0	0	0	0	0	0	0	0	0	0	0	0	0	0
Bacteria|Firmicutes|Bacilli|Bacillales|Listeriaceae|Listeria|Listeria monocytogenes|Listeria monocytogenes str. Scott A	0	0	0	0	0	0	0	0	0	0	0	0	0	0	0	0	0	0	0	0	0	0
Bacteria|Firmicutes|Bacilli|Bacillales|Listeriaceae|Listeria|Listeria seeligeri|Listeria seeligeri serovar 1/2b str. SLCC3954	0	0	0	0	0	0	0	0	0	0	0	0	0	0	0	0	0	0	0	0	0	0
Bacteria|Firmicutes|Bacilli|Bacillales|Listeriaceae|Listeria|Listeria welshimeri|Listeria welshimeri serovar 6b str. SLCC5334	0	0	0	0	0	0	0	0	0	0	0	0	0	0	0	0	0	0	0	0	0	0
Bacteria|Firmicutes|Bacilli|Bacillales|Paenibacillaceae|Brevibacillus|Brevibacillus brevis|Brevibacillus brevis NBRC 100599	0	0	0	0	0	0	0	0	0	0	0	0	0	0	0	0	0	0	0	0	0	0
Bacteria|Firmicutes|Bacilli|Bacillales|Paenibacillaceae|Brevibacillus|Brevibacillus laterosporus|Brevibacillus laterosporus LMG 15441	0	0	0	0	0	0	0	0	0	0	0	0	0	0	0	0	0	0	0	0	0	0
Bacteria|Firmicutes|Bacilli|Bacillales|Paenibacillaceae|Paenibacillus|Paenibacillus curdlanolyticus|Paenibacillus curdlanolyticus YK9	0	0	0	0	0	0	0	0	0	0	0	0	0	0	0	0	0	0	0	0	0	0
Bacteria|Firmicutes|Bacilli|Bacillales|Paenibacillaceae|Paenibacillus|Paenibacillus dendritiformis|Paenibacillus dendritiformis C454	0	0	0	0	0	0	0	0	0	0	0	0	0	0	0	0	0	0	0	0	0	0
Bacteria|Firmicutes|Bacilli|Bacillales|Paenibacillaceae|Paenibacillus|Paenibacillus elgii|Paenibacillus elgii B69	0	0	0	0	0	0	0	0	0	0	0	0	0	0	0	0	0	0	0	0	0	0
Bacteria|Firmicutes|Bacilli|Bacillales|Paenibacillaceae|Paenibacillus|Paenibacillus lactis|Paenibacillus lactis 154	0	1	1	0	0	0	0	0	0	0	0	0	0	0	0	0	0	0	0	0	0	0
Bacteria|Firmicutes|Bacilli|Bacillales|Paenibacillaceae|Paenibacillus|Paenibacillus larvae|Paenibacillus larvae subsp. larvae|Paenibacillus larvae subsp. larvae B-3650	0	0	0	0	0	0	0	0	0	0	0	0	0	0	0	0	0	0	0	0	0	0
Bacteria|Firmicutes|Bacilli|Bacillales|Paenibacillaceae|Paenibacillus|Paenibacillus larvae|Paenibacillus larvae subsp. larvae|Paenibacillus larvae subsp. larvae BRL-230010	0	0	0	0	0	0	0	0	0	0	0	0	0	0	0	0	0	0	0	0	0	0
Bacteria|Firmicutes|Bacilli|Bacillales|Paenibacillaceae|Paenibacillus|Paenibacillus mucilaginosus|Paenibacillus mucilaginosus 3016	0	0	0	0	0	0	0	0	0	0	0	0	0	0	0	0	0	0	0	0	0	0
Bacteria|Firmicutes|Bacilli|Bacillales|Paenibacillaceae|Paenibacillus|Paenibacillus mucilaginosus|Paenibacillus mucilaginosus K02	0	0	0	0	0	0	0	0	0	0	0	0	0	0	0	0	0	0	0	0	0	0
Bacteria|Firmicutes|Bacilli|Bacillales|Paenibacillaceae|Paenibacillus|Paenibacillus mucilaginosus|Paenibacillus mucilaginosus KNP414	0	0	0	0	0	0	0	0	0	0	0	0	0	0	0	0	0	0	0	0	0	0
Bacteria|Firmicutes|Bacilli|Bacillales|Paenibacillaceae|Paenibacillus|Paenibacillus polymyxa|Paenibacillus polymyxa E681	0	0	0	0	0	0	0	0	0	0	0	0	0	0	0	0	0	0	0	0	0	0
Bacteria|Firmicutes|Bacilli|Bacillales|Paenibacillaceae|Paenibacillus|Paenibacillus polymyxa|Paenibacillus polymyxa M1	0	0	0	0	0	0	0	0	0	0	0	0	0	0	0	0	0	0	0	0	0	0
Bacteria|Firmicutes|Bacilli|Bacillales|Paenibacillaceae|Paenibacillus|Paenibacillus polymyxa|Paenibacillus polymyxa SC2	0	0	0	0	0	0	0	0	0	0	0	0	0	0	0	0	0	0	0	0	0	0
Bacteria|Firmicutes|Bacilli|Bacillales|Paenibacillaceae|Paenibacillus|Paenibacillus sp. Aloe-11	0	0	0	0	0	0	0	0	0	0	0	0	0	0	0	0	0	0	0	0	0	0
Bacteria|Firmicutes|Bacilli|Bacillales|Paenibacillaceae|Paenibacillus|Paenibacillus sp. HGF5	0	0	0	0	0	0	0	0	0	0	0	0	0	0	0	0	0	0	0	0	0	0
Bacteria|Firmicutes|Bacilli|Bacillales|Paenibacillaceae|Paenibacillus|Paenibacillus sp. HGF7	0	0	0	0	0	0	0	0	0	0	0	0	0	0	0	0	0	0	0	0	0	0
Bacteria|Firmicutes|Bacilli|Bacillales|Paenibacillaceae|Paenibacillus|Paenibacillus sp. JDR-2	0	0	0	0	0	0	0	0	0	0	0	0	0	0	0	0	0	0	0	0	0	0
Bacteria|Firmicutes|Bacilli|Bacillales|Paenibacillaceae|Paenibacillus|Paenibacillus sp. oral taxon 786|Paenibacillus sp. oral taxon 786 str. D14	0	0	0	1	0	0	0	0	0	0	0	0	0	0	0	0	0	0	0	0	0	0
Bacteria|Firmicutes|Bacilli|Bacillales|Paenibacillaceae|Paenibacillus|Paenibacillus sp. Y412MC10	0	0	0	0	0	0	0	0	0	0	0	0	0	0	0	0	0	0	0	0	0	0
Bacteria|Firmicutes|Bacilli|Bacillales|Paenibacillaceae|Paenibacillus|Paenibacillus terrae|Paenibacillus terrae HPL-003	0	0	0	0	0	0	0	0	0	0	0	0	0	0	0	0	0	0	0	0	0	0
Bacteria|Firmicutes|Bacilli|Bacillales|Paenibacillaceae|Paenibacillus|Paenibacillus vortex|Paenibacillus vortex V453	0	0	0	0	0	0	0	0	0	0	0	0	0	0	0	0	0	0	0	0	0	0
Bacteria|Firmicutes|Bacilli|Bacillales|Paenibacillaceae|Thermobacillus|Thermobacillus composti|Thermobacillus composti KWC4	0	0	0	0	0	0	0	1	0	0	0	0	0	0	0	0	0	0	0	0	0	0
Bacteria|Firmicutes|Bacilli|Bacillales|Planococcaceae|Planococcus|Planococcus donghaensis|Planococcus donghaensis MPA1U2	0	0	0	0	0	0	0	0	0	0	0	0	0	0	0	0	0	0	0	0	0	0
Bacteria|Firmicutes|Bacilli|Bacillales|Planococcaceae|Solibacillus|Solibacillus silvestris|Solibacillus silvestris StLB046	0	0	1	0	0	0	0	0	0	0	0	4	0	0	0	0	0	0	0	0	0	0
Bacteria|Firmicutes|Bacilli|Bacillales|Planococcaceae|Sporosarcina|Sporosarcina newyorkensis|Sporosarcina newyorkensis 2681	0	0	0	0	0	0	0	0	0	0	0	0	0	0	0	0	0	0	0	0	0	0
Bacteria|Firmicutes|Bacilli|Bacillales|Sporolactobacillaceae|Sporolactobacillus|Sporolactobacillus inulinus|Sporolactobacillus inulinus CASD	0	0	0	0	0	0	0	0	0	0	1	0	0	0	0	0	0	0	0	0	0	0
Bacteria|Firmicutes|Bacilli|Bacillales|Staphylococcaceae|Macrococcus|Macrococcus caseolyticus|Macrococcus caseolyticus JCSC5402	509	80	32	11	6	0	0	26	0	0	0	0	0	1	0	0	17	1	0	0	0	1
Bacteria|Firmicutes|Bacilli|Bacillales|Staphylococcaceae|Staphylococcus|Staphylococcus aureus|Staphylococcus aureus 04-02981	0	0	0	0	0	0	0	0	0	0	0	0	0	0	0	0	0	0	0	0	0	0
Bacteria|Firmicutes|Bacilli|Bacillales|Staphylococcaceae|Staphylococcus|Staphylococcus aureus|Staphylococcus aureus 16K	0	0	0	0	0	0	0	0	0	0	0	0	0	0	0	0	0	0	0	0	0	0
Bacteria|Firmicutes|Bacilli|Bacillales|Staphylococcaceae|Staphylococcus|Staphylococcus aureus|Staphylococcus aureus 930918-3	0	1	0	0	0	0	0	0	0	0	0	0	0	0	0	0	0	0	0	0	0	0
Bacteria|Firmicutes|Bacilli|Bacillales|Staphylococcaceae|Staphylococcus|Staphylococcus aureus|Staphylococcus aureus A10102	0	0	0	0	0	0	0	0	0	0	0	0	0	0	0	0	0	0	0	0	0	0
Bacteria|Firmicutes|Bacilli|Bacillales|Staphylococcaceae|Staphylococcus|Staphylococcus aureus|Staphylococcus aureus A5937	0	0	0	0	0	0	0	0	0	0	0	0	0	0	0	0	0	0	0	0	0	0
Bacteria|Firmicutes|Bacilli|Bacillales|Staphylococcaceae|Staphylococcus|Staphylococcus aureus|Staphylococcus aureus A5948	2	0	0	0	0	0	0	0	0	0	0	0	0	0	0	0	0	0	0	0	0	0
Bacteria|Firmicutes|Bacilli|Bacillales|Staphylococcaceae|Staphylococcus|Staphylococcus aureus|Staphylococcus aureus A6224	0	0	0	0	0	0	0	0	0	0	0	0	0	0	0	0	0	0	0	0	0	0
Bacteria|Firmicutes|Bacilli|Bacillales|Staphylococcaceae|Staphylococcus|Staphylococcus aureus|Staphylococcus aureus A6300	0	0	0	0	0	0	0	0	0	0	0	0	0	0	0	0	0	0	0	0	0	0
Bacteria|Firmicutes|Bacilli|Bacillales|Staphylococcaceae|Staphylococcus|Staphylococcus aureus|Staphylococcus aureus A8115	0	0	0	0	0	0	0	0	0	0	0	0	0	0	0	0	0	0	0	0	0	0
Bacteria|Firmicutes|Bacilli|Bacillales|Staphylococcaceae|Staphylococcus|Staphylococcus aureus|Staphylococcus aureus A8117	0	0	0	0	0	0	0	0	0	0	0	0	0	0	0	0	0	0	0	0	0	0
Bacteria|Firmicutes|Bacilli|Bacillales|Staphylococcaceae|Staphylococcus|Staphylococcus aureus|Staphylococcus aureus A8796	0	0	0	0	0	0	0	0	0	0	0	0	0	0	0	0	0	0	0	0	0	0
Bacteria|Firmicutes|Bacilli|Bacillales|Staphylococcaceae|Staphylococcus|Staphylococcus aureus|Staphylococcus aureus A8819	0	0	0	0	0	0	0	0	0	0	0	0	0	0	0	0	0	0	0	0	0	0
Bacteria|Firmicutes|Bacilli|Bacillales|Staphylococcaceae|Staphylococcus|Staphylococcus aureus|Staphylococcus aureus A9299	0	0	0	0	0	0	0	0	0	0	0	0	0	0	0	0	0	0	0	0	0	0
Bacteria|Firmicutes|Bacilli|Bacillales|Staphylococcaceae|Staphylococcus|Staphylococcus aureus|Staphylococcus aureus A9635	0	0	0	0	0	0	0	0	0	0	0	0	0	0	0	0	0	0	0	0	0	0
Bacteria|Firmicutes|Bacilli|Bacillales|Staphylococcaceae|Staphylococcus|Staphylococcus aureus|Staphylococcus aureus A9719	0	0	0	0	0	0	0	0	0	0	0	0	0	0	0	0	0	0	0	0	0	0
Bacteria|Firmicutes|Bacilli|Bacillales|Staphylococcaceae|Staphylococcus|Staphylococcus aureus|Staphylococcus aureus A9754	0	0	0	0	0	0	0	0	0	0	0	0	0	0	0	0	0	0	0	0	0	0
Bacteria|Firmicutes|Bacilli|Bacillales|Staphylococcaceae|Staphylococcus|Staphylococcus aureus|Staphylococcus aureus A9763	0	0	0	0	0	0	0	0	0	0	0	0	0	0	0	0	0	0	0	0	0	0
Bacteria|Firmicutes|Bacilli|Bacillales|Staphylococcaceae|Staphylococcus|Staphylococcus aureus|Staphylococcus aureus A9765	0	0	0	0	0	0	0	0	0	0	0	0	0	0	0	0	0	0	0	0	0	0
Bacteria|Firmicutes|Bacilli|Bacillales|Staphylococcaceae|Staphylococcus|Staphylococcus aureus|Staphylococcus aureus A9781	0	0	0	0	0	0	0	0	0	0	0	0	0	0	0	0	0	0	0	0	0	0
Bacteria|Firmicutes|Bacilli|Bacillales|Staphylococcaceae|Staphylococcus|Staphylococcus aureus|Staphylococcus aureus D30	0	0	1	0	0	0	0	0	0	0	0	0	0	0	0	0	0	0	0	0	0	0
Bacteria|Firmicutes|Bacilli|Bacillales|Staphylococcaceae|Staphylococcus|Staphylococcus aureus|Staphylococcus aureus RF122	1	0	0	0	0	0	0	0	0	0	0	0	0	0	0	0	0	0	0	0	0	0
Bacteria|Firmicutes|Bacilli|Bacillales|Staphylococcaceae|Staphylococcus|Staphylococcus aureus|Staphylococcus aureus subsp. aureus|Staphylococcus aureus subsp. aureus 118	0	0	0	0	0	0	0	0	0	0	0	0	0	0	0	0	0	0	0	0	0	0
Bacteria|Firmicutes|Bacilli|Bacillales|Staphylococcaceae|Staphylococcus|Staphylococcus aureus|Staphylococcus aureus subsp. aureus|Staphylococcus aureus subsp. aureus 11819-97	0	0	0	0	0	0	0	0	0	0	0	0	0	0	0	0	0	0	0	0	0	0
Bacteria|Firmicutes|Bacilli|Bacillales|Staphylococcaceae|Staphylococcus|Staphylococcus aureus|Staphylococcus aureus subsp. aureus|Staphylococcus aureus subsp. aureus 132	0	0	0	0	0	0	0	0	0	0	0	0	0	0	0	0	0	0	0	0	0	0
Bacteria|Firmicutes|Bacilli|Bacillales|Staphylococcaceae|Staphylococcus|Staphylococcus aureus|Staphylococcus aureus subsp. aureus|Staphylococcus aureus subsp. aureus 21172	0	0	0	0	0	0	0	0	0	0	0	0	0	0	0	0	0	0	0	0	0	0
Bacteria|Firmicutes|Bacilli|Bacillales|Staphylococcaceae|Staphylococcus|Staphylococcus aureus|Staphylococcus aureus subsp. aureus|Staphylococcus aureus subsp. aureus 21178	0	0	0	0	0	0	0	0	0	0	0	0	0	0	0	0	0	0	0	0	0	0
Bacteria|Firmicutes|Bacilli|Bacillales|Staphylococcaceae|Staphylococcus|Staphylococcus aureus|Staphylococcus aureus subsp. aureus|Staphylococcus aureus subsp. aureus 21189	0	0	0	0	0	0	0	0	0	0	0	0	0	0	0	0	0	0	0	0	0	0
Bacteria|Firmicutes|Bacilli|Bacillales|Staphylococcaceae|Staphylococcus|Staphylococcus aureus|Staphylococcus aureus subsp. aureus|Staphylococcus aureus subsp. aureus 21193	0	0	0	0	0	0	0	0	0	0	0	0	0	0	0	0	0	0	0	0	0	0
Bacteria|Firmicutes|Bacilli|Bacillales|Staphylococcaceae|Staphylococcus|Staphylococcus aureus|Staphylococcus aureus subsp. aureus|Staphylococcus aureus subsp. aureus 21194	0	0	0	0	0	0	0	0	0	0	0	0	0	0	0	0	0	0	0	0	0	0
Bacteria|Firmicutes|Bacilli|Bacillales|Staphylococcaceae|Staphylococcus|Staphylococcus aureus|Staphylococcus aureus subsp. aureus|Staphylococcus aureus subsp. aureus 21195	1	0	0	0	0	0	0	0	0	0	0	0	0	0	0	0	0	0	0	0	0	0
Bacteria|Firmicutes|Bacilli|Bacillales|Staphylococcaceae|Staphylococcus|Staphylococcus aureus|Staphylococcus aureus subsp. aureus|Staphylococcus aureus subsp. aureus 21200	0	0	0	0	0	0	0	0	0	0	0	0	0	0	0	0	0	0	0	0	0	0
Bacteria|Firmicutes|Bacilli|Bacillales|Staphylococcaceae|Staphylococcus|Staphylococcus aureus|Staphylococcus aureus subsp. aureus|Staphylococcus aureus subsp. aureus 21201	0	0	0	0	0	0	0	0	0	0	0	0	0	0	0	0	0	0	0	0	0	0
Bacteria|Firmicutes|Bacilli|Bacillales|Staphylococcaceae|Staphylococcus|Staphylococcus aureus|Staphylococcus aureus subsp. aureus|Staphylococcus aureus subsp. aureus 21202	0	0	0	0	0	0	0	0	0	0	0	0	0	0	0	0	0	0	0	0	0	0
Bacteria|Firmicutes|Bacilli|Bacillales|Staphylococcaceae|Staphylococcus|Staphylococcus aureus|Staphylococcus aureus subsp. aureus|Staphylococcus aureus subsp. aureus 21209	0	0	0	0	0	0	0	0	0	0	0	0	0	0	0	0	0	0	0	0	0	0
Bacteria|Firmicutes|Bacilli|Bacillales|Staphylococcaceae|Staphylococcus|Staphylococcus aureus|Staphylococcus aureus subsp. aureus|Staphylococcus aureus subsp. aureus 21232	0	0	0	0	0	0	0	0	0	0	0	0	0	0	0	0	0	0	0	0	0	0
Bacteria|Firmicutes|Bacilli|Bacillales|Staphylococcaceae|Staphylococcus|Staphylococcus aureus|Staphylococcus aureus subsp. aureus|Staphylococcus aureus subsp. aureus 21235	0	0	0	0	0	0	0	1	0	0	0	0	0	0	0	0	0	0	0	0	0	0
Bacteria|Firmicutes|Bacilli|Bacillales|Staphylococcaceae|Staphylococcus|Staphylococcus aureus|Staphylococcus aureus subsp. aureus|Staphylococcus aureus subsp. aureus 21252	0	0	0	0	0	0	0	0	0	0	0	0	0	0	0	0	0	0	0	0	0	0
Bacteria|Firmicutes|Bacilli|Bacillales|Staphylococcaceae|Staphylococcus|Staphylococcus aureus|Staphylococcus aureus subsp. aureus|Staphylococcus aureus subsp. aureus 21259	0	0	0	0	0	0	0	0	0	0	0	0	0	0	0	0	0	0	0	0	0	0
Bacteria|Firmicutes|Bacilli|Bacillales|Staphylococcaceae|Staphylococcus|Staphylococcus aureus|Staphylococcus aureus subsp. aureus|Staphylococcus aureus subsp. aureus 21262	0	0	0	0	0	0	0	0	0	0	0	0	0	0	0	0	0	0	0	0	0	0
Bacteria|Firmicutes|Bacilli|Bacillales|Staphylococcaceae|Staphylococcus|Staphylococcus aureus|Staphylococcus aureus subsp. aureus|Staphylococcus aureus subsp. aureus 21264	0	0	0	0	0	0	0	0	0	0	0	0	0	0	0	0	0	0	0	0	0	0
Bacteria|Firmicutes|Bacilli|Bacillales|Staphylococcaceae|Staphylococcus|Staphylococcus aureus|Staphylococcus aureus subsp. aureus|Staphylococcus aureus subsp. aureus 21266	0	0	0	0	0	0	0	0	0	0	0	0	0	0	0	0	0	0	0	0	0	0
Bacteria|Firmicutes|Bacilli|Bacillales|Staphylococcaceae|Staphylococcus|Staphylococcus aureus|Staphylococcus aureus subsp. aureus|Staphylococcus aureus subsp. aureus 21269	0	0	0	0	0	0	0	0	0	0	0	0	0	0	0	0	0	0	0	0	0	0
Bacteria|Firmicutes|Bacilli|Bacillales|Staphylococcaceae|Staphylococcus|Staphylococcus aureus|Staphylococcus aureus subsp. aureus|Staphylococcus aureus subsp. aureus 21272	0	0	0	0	0	0	0	0	0	0	0	0	0	0	0	0	0	0	0	0	0	0
Bacteria|Firmicutes|Bacilli|Bacillales|Staphylococcaceae|Staphylococcus|Staphylococcus aureus|Staphylococcus aureus subsp. aureus|Staphylococcus aureus subsp. aureus 21283	0	0	0	0	0	0	0	0	0	0	0	0	0	0	0	0	0	0	0	0	0	0
Bacteria|Firmicutes|Bacilli|Bacillales|Staphylococcaceae|Staphylococcus|Staphylococcus aureus|Staphylococcus aureus subsp. aureus|Staphylococcus aureus subsp. aureus 21305	0	0	0	0	0	0	0	0	0	0	0	0	0	0	0	0	0	0	0	0	0	0
Bacteria|Firmicutes|Bacilli|Bacillales|Staphylococcaceae|Staphylococcus|Staphylococcus aureus|Staphylococcus aureus subsp. aureus|Staphylococcus aureus subsp. aureus 21310	0	0	0	0	0	0	0	0	0	0	0	0	0	0	0	0	0	0	0	0	0	0
Bacteria|Firmicutes|Bacilli|Bacillales|Staphylococcaceae|Staphylococcus|Staphylococcus aureus|Staphylococcus aureus subsp. aureus|Staphylococcus aureus subsp. aureus 21318	0	0	0	0	0	0	0	0	0	0	0	0	0	0	0	0	0	0	0	0	0	0
Bacteria|Firmicutes|Bacilli|Bacillales|Staphylococcaceae|Staphylococcus|Staphylococcus aureus|Staphylococcus aureus subsp. aureus|Staphylococcus aureus subsp. aureus 21331	0	0	0	0	0	0	0	0	0	0	0	0	0	0	0	0	0	0	0	0	0	0
Bacteria|Firmicutes|Bacilli|Bacillales|Staphylococcaceae|Staphylococcus|Staphylococcus aureus|Staphylococcus aureus subsp. aureus|Staphylococcus aureus subsp. aureus 21333	0	0	0	0	0	0	0	0	0	0	0	0	0	0	0	0	1	0	0	0	0	0
Bacteria|Firmicutes|Bacilli|Bacillales|Staphylococcaceae|Staphylococcus|Staphylococcus aureus|Staphylococcus aureus subsp. aureus|Staphylococcus aureus subsp. aureus 21334	0	0	0	0	0	0	0	0	0	0	0	0	0	0	0	0	0	0	0	0	0	0
Bacteria|Firmicutes|Bacilli|Bacillales|Staphylococcaceae|Staphylococcus|Staphylococcus aureus|Staphylococcus aureus subsp. aureus|Staphylococcus aureus subsp. aureus 21340	0	0	0	0	0	0	0	0	0	0	0	0	0	0	0	0	0	0	0	0	0	0
Bacteria|Firmicutes|Bacilli|Bacillales|Staphylococcaceae|Staphylococcus|Staphylococcus aureus|Staphylococcus aureus subsp. aureus|Staphylococcus aureus subsp. aureus 21342	0	0	1	0	0	0	0	0	0	0	0	0	0	0	0	0	0	0	0	0	0	0
Bacteria|Firmicutes|Bacilli|Bacillales|Staphylococcaceae|Staphylococcus|Staphylococcus aureus|Staphylococcus aureus subsp. aureus|Staphylococcus aureus subsp. aureus 21343	0	0	0	0	0	0	0	0	0	0	0	0	0	0	0	0	0	0	0	0	0	0
Bacteria|Firmicutes|Bacilli|Bacillales|Staphylococcaceae|Staphylococcus|Staphylococcus aureus|Staphylococcus aureus subsp. aureus|Staphylococcus aureus subsp. aureus 21345	0	0	0	0	0	0	0	0	0	0	0	0	0	0	0	0	0	0	0	0	0	0
Bacteria|Firmicutes|Bacilli|Bacillales|Staphylococcaceae|Staphylococcus|Staphylococcus aureus|Staphylococcus aureus subsp. aureus|Staphylococcus aureus subsp. aureus 55/2053	0	0	0	0	0	0	0	0	0	0	0	0	0	0	0	0	0	0	0	0	0	0
Bacteria|Firmicutes|Bacilli|Bacillales|Staphylococcaceae|Staphylococcus|Staphylococcus aureus|Staphylococcus aureus subsp. aureus|Staphylococcus aureus subsp. aureus 58-424	0	0	0	0	0	0	0	0	0	0	0	0	0	0	0	0	0	0	0	0	0	0
Bacteria|Firmicutes|Bacilli|Bacillales|Staphylococcaceae|Staphylococcus|Staphylococcus aureus|Staphylococcus aureus subsp. aureus|Staphylococcus aureus subsp. aureus 65-1322	0	0	0	0	0	0	0	0	0	0	0	0	0	0	0	0	0	0	0	0	0	0
Bacteria|Firmicutes|Bacilli|Bacillales|Staphylococcaceae|Staphylococcus|Staphylococcus aureus|Staphylococcus aureus subsp. aureus|Staphylococcus aureus subsp. aureus 68-397	0	0	0	0	0	0	0	0	0	0	0	0	0	0	0	0	0	0	0	0	0	0
Bacteria|Firmicutes|Bacilli|Bacillales|Staphylococcaceae|Staphylococcus|Staphylococcus aureus|Staphylococcus aureus subsp. aureus|Staphylococcus aureus subsp. aureus A017934/97	0	0	0	0	0	0	0	0	0	0	0	0	0	0	0	0	0	0	0	0	0	0
Bacteria|Firmicutes|Bacilli|Bacillales|Staphylococcaceae|Staphylococcus|Staphylococcus aureus|Staphylococcus aureus subsp. aureus|Staphylococcus aureus subsp. aureus ATCC 51811	0	0	0	0	0	0	0	0	0	0	0	0	0	0	0	0	0	0	0	0	0	0
Bacteria|Firmicutes|Bacilli|Bacillales|Staphylococcaceae|Staphylococcus|Staphylococcus aureus|Staphylococcus aureus subsp. aureus|Staphylococcus aureus subsp. aureus ATCC BAA-39	0	0	0	0	0	0	0	0	0	0	0	0	0	0	0	0	0	0	0	0	0	0
Bacteria|Firmicutes|Bacilli|Bacillales|Staphylococcaceae|Staphylococcus|Staphylococcus aureus|Staphylococcus aureus subsp. aureus|Staphylococcus aureus subsp. aureus Btn1260	0	0	0	0	0	0	0	0	0	0	0	0	0	0	0	0	0	0	0	0	0	0
Bacteria|Firmicutes|Bacilli|Bacillales|Staphylococcaceae|Staphylococcus|Staphylococcus aureus|Staphylococcus aureus subsp. aureus|Staphylococcus aureus subsp. aureus C101	0	0	0	0	0	0	0	0	0	0	0	0	0	0	0	0	0	0	0	0	0	0
Bacteria|Firmicutes|Bacilli|Bacillales|Staphylococcaceae|Staphylococcus|Staphylococcus aureus|Staphylococcus aureus subsp. aureus|Staphylococcus aureus subsp. aureus C160	0	0	0	0	0	0	0	0	0	0	0	0	0	0	0	0	0	0	0	0	0	0
Bacteria|Firmicutes|Bacilli|Bacillales|Staphylococcaceae|Staphylococcus|Staphylococcus aureus|Staphylococcus aureus subsp. aureus|Staphylococcus aureus subsp. aureus C427	0	0	0	0	0	0	0	0	0	0	0	0	0	0	0	0	0	0	0	0	0	0
Bacteria|Firmicutes|Bacilli|Bacillales|Staphylococcaceae|Staphylococcus|Staphylococcus aureus|Staphylococcus aureus subsp. aureus|Staphylococcus aureus subsp. aureus CGS00	0	0	0	0	0	0	0	0	0	0	0	0	0	0	0	0	0	0	0	0	0	0
Bacteria|Firmicutes|Bacilli|Bacillales|Staphylococcaceae|Staphylococcus|Staphylococcus aureus|Staphylococcus aureus subsp. aureus|Staphylococcus aureus subsp. aureus CGS01	0	0	0	0	0	0	0	0	0	0	0	0	0	0	0	0	0	0	0	0	0	0
Bacteria|Firmicutes|Bacilli|Bacillales|Staphylococcaceae|Staphylococcus|Staphylococcus aureus|Staphylococcus aureus subsp. aureus|Staphylococcus aureus subsp. aureus CGS03	0	0	0	0	0	0	0	0	0	0	0	0	0	0	0	0	0	0	0	0	0	0
Bacteria|Firmicutes|Bacilli|Bacillales|Staphylococcaceae|Staphylococcus|Staphylococcus aureus|Staphylococcus aureus subsp. aureus|Staphylococcus aureus subsp. aureus CIG1057	0	0	0	0	0	0	0	0	0	0	0	0	0	0	0	0	0	0	0	0	0	0
Bacteria|Firmicutes|Bacilli|Bacillales|Staphylococcaceae|Staphylococcus|Staphylococcus aureus|Staphylococcus aureus subsp. aureus|Staphylococcus aureus subsp. aureus CIG1096	0	0	0	0	0	0	0	0	0	0	0	0	0	0	0	0	0	0	0	0	0	0
Bacteria|Firmicutes|Bacilli|Bacillales|Staphylococcaceae|Staphylococcus|Staphylococcus aureus|Staphylococcus aureus subsp. aureus|Staphylococcus aureus subsp. aureus CIG1114	0	0	0	0	0	0	0	0	0	0	0	0	0	0	0	0	0	0	0	0	0	0
Bacteria|Firmicutes|Bacilli|Bacillales|Staphylococcaceae|Staphylococcus|Staphylococcus aureus|Staphylococcus aureus subsp. aureus|Staphylococcus aureus subsp. aureus CIG1150	0	0	0	0	0	0	0	0	0	0	0	0	0	0	0	0	0	0	0	0	0	0
Bacteria|Firmicutes|Bacilli|Bacillales|Staphylococcaceae|Staphylococcus|Staphylococcus aureus|Staphylococcus aureus subsp. aureus|Staphylococcus aureus subsp. aureus CIG1165	0	0	0	0	0	0	0	0	0	0	0	0	0	0	0	0	0	0	0	0	0	0
Bacteria|Firmicutes|Bacilli|Bacillales|Staphylococcaceae|Staphylococcus|Staphylococcus aureus|Staphylococcus aureus subsp. aureus|Staphylococcus aureus subsp. aureus CIG1176	0	0	0	0	0	0	0	0	0	0	0	0	0	0	0	0	0	0	0	0	0	0
Bacteria|Firmicutes|Bacilli|Bacillales|Staphylococcaceae|Staphylococcus|Staphylococcus aureus|Staphylococcus aureus subsp. aureus|Staphylococcus aureus subsp. aureus CIG1213	0	0	0	0	0	0	0	0	0	0	0	0	0	0	0	0	0	0	0	0	0	0
Bacteria|Firmicutes|Bacilli|Bacillales|Staphylococcaceae|Staphylococcus|Staphylococcus aureus|Staphylococcus aureus subsp. aureus|Staphylococcus aureus subsp. aureus CIG1214	0	0	0	0	0	0	0	0	0	0	0	0	0	0	0	0	0	0	0	0	0	0
Bacteria|Firmicutes|Bacilli|Bacillales|Staphylococcaceae|Staphylococcus|Staphylococcus aureus|Staphylococcus aureus subsp. aureus|Staphylococcus aureus subsp. aureus CIG1233	0	0	0	0	0	0	0	0	0	0	0	0	0	0	0	0	0	0	0	0	0	0
Bacteria|Firmicutes|Bacilli|Bacillales|Staphylococcaceae|Staphylococcus|Staphylococcus aureus|Staphylococcus aureus subsp. aureus|Staphylococcus aureus subsp. aureus CIG1242	1	0	0	0	0	0	0	0	0	0	0	0	0	1	0	0	0	0	0	0	0	0
Bacteria|Firmicutes|Bacilli|Bacillales|Staphylococcaceae|Staphylococcus|Staphylococcus aureus|Staphylococcus aureus subsp. aureus|Staphylococcus aureus subsp. aureus CIG1267	0	0	0	0	0	0	0	0	0	0	0	0	0	0	0	0	0	0	0	0	0	0
Bacteria|Firmicutes|Bacilli|Bacillales|Staphylococcaceae|Staphylococcus|Staphylococcus aureus|Staphylococcus aureus subsp. aureus|Staphylococcus aureus subsp. aureus CIG149	0	0	0	0	0	0	0	0	0	0	0	0	0	0	0	0	0	0	0	0	0	0
Bacteria|Firmicutes|Bacilli|Bacillales|Staphylococcaceae|Staphylococcus|Staphylococcus aureus|Staphylococcus aureus subsp. aureus|Staphylococcus aureus subsp. aureus CIG1500	0	0	0	0	0	0	0	0	0	0	0	0	0	0	0	0	0	0	0	0	0	0
Bacteria|Firmicutes|Bacilli|Bacillales|Staphylococcaceae|Staphylococcus|Staphylococcus aureus|Staphylococcus aureus subsp. aureus|Staphylococcus aureus subsp. aureus CIG1524	0	0	0	0	0	0	0	0	0	0	0	0	0	0	0	0	0	0	0	0	0	0
Bacteria|Firmicutes|Bacilli|Bacillales|Staphylococcaceae|Staphylococcus|Staphylococcus aureus|Staphylococcus aureus subsp. aureus|Staphylococcus aureus subsp. aureus CIG1605	0	0	0	0	0	0	0	0	0	0	0	0	0	0	0	0	0	0	0	0	0	0
Bacteria|Firmicutes|Bacilli|Bacillales|Staphylococcaceae|Staphylococcus|Staphylococcus aureus|Staphylococcus aureus subsp. aureus|Staphylococcus aureus subsp. aureus CIG1612	0	0	0	0	0	0	0	0	0	0	0	0	0	0	0	0	0	0	0	0	0	0
Bacteria|Firmicutes|Bacilli|Bacillales|Staphylococcaceae|Staphylococcus|Staphylococcus aureus|Staphylococcus aureus subsp. aureus|Staphylococcus aureus subsp. aureus CIG1750	0	0	0	0	0	0	0	0	0	0	0	0	0	0	0	0	0	0	0	0	0	0
Bacteria|Firmicutes|Bacilli|Bacillales|Staphylococcaceae|Staphylococcus|Staphylococcus aureus|Staphylococcus aureus subsp. aureus|Staphylococcus aureus subsp. aureus CIG1769	0	0	0	0	0	0	0	0	0	0	0	0	0	0	0	0	0	0	0	0	0	0
Bacteria|Firmicutes|Bacilli|Bacillales|Staphylococcaceae|Staphylococcus|Staphylococcus aureus|Staphylococcus aureus subsp. aureus|Staphylococcus aureus subsp. aureus CIG1770	0	0	0	0	0	0	0	0	0	0	0	0	0	0	0	0	0	0	0	0	0	0
Bacteria|Firmicutes|Bacilli|Bacillales|Staphylococcaceae|Staphylococcus|Staphylococcus aureus|Staphylococcus aureus subsp. aureus|Staphylococcus aureus subsp. aureus CIG1835	0	0	0	0	0	0	0	0	0	0	0	0	0	0	0	0	0	0	0	0	0	0
Bacteria|Firmicutes|Bacilli|Bacillales|Staphylococcaceae|Staphylococcus|Staphylococcus aureus|Staphylococcus aureus subsp. aureus|Staphylococcus aureus subsp. aureus CIG2018	0	0	0	0	0	0	0	0	0	0	0	0	0	0	0	0	0	0	0	0	0	0
Bacteria|Firmicutes|Bacilli|Bacillales|Staphylococcaceae|Staphylococcus|Staphylococcus aureus|Staphylococcus aureus subsp. aureus|Staphylococcus aureus subsp. aureus CIG290	0	0	0	0	0	0	0	0	0	0	0	0	0	0	0	0	0	0	0	0	0	0
Bacteria|Firmicutes|Bacilli|Bacillales|Staphylococcaceae|Staphylococcus|Staphylococcus aureus|Staphylococcus aureus subsp. aureus|Staphylococcus aureus subsp. aureus CIG547	0	0	0	0	0	0	0	0	0	0	0	0	0	0	0	0	0	0	0	0	0	0
Bacteria|Firmicutes|Bacilli|Bacillales|Staphylococcaceae|Staphylococcus|Staphylococcus aureus|Staphylococcus aureus subsp. aureus|Staphylococcus aureus subsp. aureus CIGC128	0	0	0	0	0	0	0	0	0	0	0	0	0	0	0	0	0	0	0	0	0	0
Bacteria|Firmicutes|Bacilli|Bacillales|Staphylococcaceae|Staphylococcus|Staphylococcus aureus|Staphylococcus aureus subsp. aureus|Staphylococcus aureus subsp. aureus CIGC340D	0	0	0	0	0	0	0	0	0	0	0	0	0	0	0	0	0	0	0	0	0	0
Bacteria|Firmicutes|Bacilli|Bacillales|Staphylococcaceae|Staphylococcus|Staphylococcus aureus|Staphylococcus aureus subsp. aureus|Staphylococcus aureus subsp. aureus CIGC341D	0	0	0	0	0	0	0	0	0	0	0	0	0	0	0	0	0	0	0	0	0	0
Bacteria|Firmicutes|Bacilli|Bacillales|Staphylococcaceae|Staphylococcus|Staphylococcus aureus|Staphylococcus aureus subsp. aureus|Staphylococcus aureus subsp. aureus CIGC345D	0	0	0	0	0	0	0	0	0	0	0	0	0	0	0	0	0	0	0	0	0	0
Bacteria|Firmicutes|Bacilli|Bacillales|Staphylococcaceae|Staphylococcus|Staphylococcus aureus|Staphylococcus aureus subsp. aureus|Staphylococcus aureus subsp. aureus CIGC348	0	0	0	0	0	0	0	0	0	0	0	0	0	0	0	0	0	0	0	0	0	0
Bacteria|Firmicutes|Bacilli|Bacillales|Staphylococcaceae|Staphylococcus|Staphylococcus aureus|Staphylococcus aureus subsp. aureus|Staphylococcus aureus subsp. aureus CIGC93	0	0	0	0	0	0	0	0	0	0	0	0	0	0	0	0	0	0	0	0	0	0
Bacteria|Firmicutes|Bacilli|Bacillales|Staphylococcaceae|Staphylococcus|Staphylococcus aureus|Staphylococcus aureus subsp. aureus|Staphylococcus aureus subsp. aureus CM05	0	0	0	0	0	0	0	0	0	0	0	0	0	0	0	0	0	0	0	0	0	0
Bacteria|Firmicutes|Bacilli|Bacillales|Staphylococcaceae|Staphylococcus|Staphylococcus aureus|Staphylococcus aureus subsp. aureus|Staphylococcus aureus subsp. aureus CO-23	0	0	0	0	0	0	0	0	0	0	0	0	0	0	0	0	0	0	0	0	0	0
Bacteria|Firmicutes|Bacilli|Bacillales|Staphylococcaceae|Staphylococcus|Staphylococcus aureus|Staphylococcus aureus subsp. aureus|Staphylococcus aureus subsp. aureus COL	0	0	0	0	0	0	0	0	0	0	0	0	0	0	0	0	0	0	0	0	0	0
Bacteria|Firmicutes|Bacilli|Bacillales|Staphylococcaceae|Staphylococcus|Staphylococcus aureus|Staphylococcus aureus subsp. aureus|Staphylococcus aureus subsp. aureus D139	0	0	0	0	0	0	0	0	0	0	0	0	0	0	0	0	0	0	0	0	0	0
Bacteria|Firmicutes|Bacilli|Bacillales|Staphylococcaceae|Staphylococcus|Staphylococcus aureus|Staphylococcus aureus subsp. aureus|Staphylococcus aureus subsp. aureus E1410	0	0	0	0	0	0	0	0	0	0	0	0	0	0	0	0	0	0	0	0	0	0
Bacteria|Firmicutes|Bacilli|Bacillales|Staphylococcaceae|Staphylococcus|Staphylococcus aureus|Staphylococcus aureus subsp. aureus|Staphylococcus aureus subsp. aureus ECT-R 2	0	0	0	0	0	0	0	0	0	0	0	0	0	0	0	0	0	0	0	0	0	0
Bacteria|Firmicutes|Bacilli|Bacillales|Staphylococcaceae|Staphylococcus|Staphylococcus aureus|Staphylococcus aureus subsp. aureus|Staphylococcus aureus subsp. aureus ED133	0	0	0	0	0	0	0	0	0	0	0	0	0	0	0	0	0	0	0	0	0	0
Bacteria|Firmicutes|Bacilli|Bacillales|Staphylococcaceae|Staphylococcus|Staphylococcus aureus|Staphylococcus aureus subsp. aureus|Staphylococcus aureus subsp. aureus ED98	0	0	0	0	0	0	0	0	0	0	0	0	0	0	0	0	0	0	0	0	0	0
Bacteria|Firmicutes|Bacilli|Bacillales|Staphylococcaceae|Staphylococcus|Staphylococcus aureus|Staphylococcus aureus subsp. aureus|Staphylococcus aureus subsp. aureus EMRSA16	0	0	0	0	0	0	0	0	0	0	0	0	0	0	0	0	0	0	0	0	0	0
Bacteria|Firmicutes|Bacilli|Bacillales|Staphylococcaceae|Staphylococcus|Staphylococcus aureus|Staphylococcus aureus subsp. aureus|Staphylococcus aureus subsp. aureus GR1	0	0	0	0	0	0	0	0	0	0	0	0	0	0	0	0	0	0	0	0	0	0
Bacteria|Firmicutes|Bacilli|Bacillales|Staphylococcaceae|Staphylococcus|Staphylococcus aureus|Staphylococcus aureus subsp. aureus|Staphylococcus aureus subsp. aureus H19	0	0	0	0	0	0	0	0	0	0	0	0	0	0	0	0	0	0	0	0	0	0
Bacteria|Firmicutes|Bacilli|Bacillales|Staphylococcaceae|Staphylococcus|Staphylococcus aureus|Staphylococcus aureus subsp. aureus|Staphylococcus aureus subsp. aureus HO 5096 0412	0	0	0	0	0	0	0	0	0	0	0	0	0	0	0	0	0	0	0	0	0	0
Bacteria|Firmicutes|Bacilli|Bacillales|Staphylococcaceae|Staphylococcus|Staphylococcus aureus|Staphylococcus aureus subsp. aureus|Staphylococcus aureus subsp. aureus IS-105	0	0	0	0	0	0	0	0	0	0	0	0	0	0	0	0	0	0	0	0	0	0
Bacteria|Firmicutes|Bacilli|Bacillales|Staphylococcaceae|Staphylococcus|Staphylococcus aureus|Staphylococcus aureus subsp. aureus|Staphylococcus aureus subsp. aureus IS-111	0	0	0	0	0	0	0	0	0	0	0	0	0	0	0	0	0	0	0	0	0	0
Bacteria|Firmicutes|Bacilli|Bacillales|Staphylococcaceae|Staphylococcus|Staphylococcus aureus|Staphylococcus aureus subsp. aureus|Staphylococcus aureus subsp. aureus IS-122	0	0	0	0	0	0	0	0	0	0	0	0	0	0	0	0	0	0	0	0	0	0
Bacteria|Firmicutes|Bacilli|Bacillales|Staphylococcaceae|Staphylococcus|Staphylococcus aureus|Staphylococcus aureus subsp. aureus|Staphylococcus aureus subsp. aureus IS-125	0	0	0	0	0	0	0	0	0	0	0	0	0	0	0	0	0	0	0	0	0	0
Bacteria|Firmicutes|Bacilli|Bacillales|Staphylococcaceae|Staphylococcus|Staphylococcus aureus|Staphylococcus aureus subsp. aureus|Staphylococcus aureus subsp. aureus IS-157	0	0	0	0	0	0	0	0	0	0	0	0	0	0	0	0	0	0	0	0	0	0
Bacteria|Firmicutes|Bacilli|Bacillales|Staphylococcaceae|Staphylococcus|Staphylococcus aureus|Staphylococcus aureus subsp. aureus|Staphylococcus aureus subsp. aureus IS-160	0	0	0	0	0	0	0	0	0	0	0	0	0	0	0	0	0	0	0	0	0	0
Bacteria|Firmicutes|Bacilli|Bacillales|Staphylococcaceae|Staphylococcus|Staphylococcus aureus|Staphylococcus aureus subsp. aureus|Staphylococcus aureus subsp. aureus IS-189	3	2	0	0	1	0	0	0	0	0	0	0	0	0	0	0	0	0	0	0	0	0
Bacteria|Firmicutes|Bacilli|Bacillales|Staphylococcaceae|Staphylococcus|Staphylococcus aureus|Staphylococcus aureus subsp. aureus|Staphylococcus aureus subsp. aureus IS-24	0	0	0	0	0	0	0	0	0	0	0	0	0	0	0	0	0	0	0	0	0	0
Bacteria|Firmicutes|Bacilli|Bacillales|Staphylococcaceae|Staphylococcus|Staphylococcus aureus|Staphylococcus aureus subsp. aureus|Staphylococcus aureus subsp. aureus IS-3	0	0	0	0	0	0	0	0	0	0	0	0	0	0	0	0	0	0	0	0	0	0
Bacteria|Firmicutes|Bacilli|Bacillales|Staphylococcaceae|Staphylococcus|Staphylococcus aureus|Staphylococcus aureus subsp. aureus|Staphylococcus aureus subsp. aureus IS-55	0	0	0	0	0	0	0	0	0	0	0	0	0	0	0	0	0	0	0	0	0	0
Bacteria|Firmicutes|Bacilli|Bacillales|Staphylococcaceae|Staphylococcus|Staphylococcus aureus|Staphylococcus aureus subsp. aureus|Staphylococcus aureus subsp. aureus IS-88	0	0	0	0	0	0	0	0	0	0	0	0	0	0	0	0	0	0	0	0	0	0
Bacteria|Firmicutes|Bacilli|Bacillales|Staphylococcaceae|Staphylococcus|Staphylococcus aureus|Staphylococcus aureus subsp. aureus|Staphylococcus aureus subsp. aureus IS-91	0	0	0	0	0	0	0	0	0	0	0	0	0	0	0	0	0	0	0	0	0	0
Bacteria|Firmicutes|Bacilli|Bacillales|Staphylococcaceae|Staphylococcus|Staphylococcus aureus|Staphylococcus aureus subsp. aureus|Staphylococcus aureus subsp. aureus IS-99	0	0	0	0	0	0	0	0	0	0	0	0	0	0	0	0	0	0	0	0	0	0
Bacteria|Firmicutes|Bacilli|Bacillales|Staphylococcaceae|Staphylococcus|Staphylococcus aureus|Staphylococcus aureus subsp. aureus|Staphylococcus aureus subsp. aureus IS-M	0	0	0	0	0	0	0	0	0	0	0	0	0	0	0	0	0	0	0	0	0	0
Bacteria|Firmicutes|Bacilli|Bacillales|Staphylococcaceae|Staphylococcus|Staphylococcus aureus|Staphylococcus aureus subsp. aureus|Staphylococcus aureus subsp. aureus JH1	0	0	0	0	0	0	0	0	0	0	0	0	0	0	0	0	0	0	0	0	0	0
Bacteria|Firmicutes|Bacilli|Bacillales|Staphylococcaceae|Staphylococcus|Staphylococcus aureus|Staphylococcus aureus subsp. aureus|Staphylococcus aureus subsp. aureus JH9	0	0	0	0	0	0	0	0	0	0	0	0	0	0	0	0	0	0	0	0	0	0
Bacteria|Firmicutes|Bacilli|Bacillales|Staphylococcaceae|Staphylococcus|Staphylococcus aureus|Staphylococcus aureus subsp. aureus|Staphylococcus aureus subsp. aureus JKD6159	0	0	0	0	0	0	0	0	0	0	0	0	0	0	0	0	0	0	0	0	0	0
Bacteria|Firmicutes|Bacilli|Bacillales|Staphylococcaceae|Staphylococcus|Staphylococcus aureus|Staphylococcus aureus subsp. aureus|Staphylococcus aureus subsp. aureus LGA251	1	1	1	0	0	0	0	1	0	0	0	0	0	0	0	0	0	0	0	0	0	0
Bacteria|Firmicutes|Bacilli|Bacillales|Staphylococcaceae|Staphylococcus|Staphylococcus aureus|Staphylococcus aureus subsp. aureus|Staphylococcus aureus subsp. aureus M013	0	0	0	0	0	0	0	0	0	0	0	0	0	0	0	0	0	0	0	0	0	0
Bacteria|Firmicutes|Bacilli|Bacillales|Staphylococcaceae|Staphylococcus|Staphylococcus aureus|Staphylococcus aureus subsp. aureus|Staphylococcus aureus subsp. aureus M1015	0	0	0	0	0	0	0	0	0	0	0	0	0	0	0	0	0	0	0	0	0	0
Bacteria|Firmicutes|Bacilli|Bacillales|Staphylococcaceae|Staphylococcus|Staphylococcus aureus|Staphylococcus aureus subsp. aureus|Staphylococcus aureus subsp. aureus M809	0	0	0	0	0	0	0	0	0	0	0	0	0	0	0	0	0	0	0	0	0	0
Bacteria|Firmicutes|Bacilli|Bacillales|Staphylococcaceae|Staphylococcus|Staphylococcus aureus|Staphylococcus aureus subsp. aureus|Staphylococcus aureus subsp. aureus M876	0	0	0	0	0	0	0	0	0	0	0	0	0	0	0	0	0	0	0	0	0	0
Bacteria|Firmicutes|Bacilli|Bacillales|Staphylococcaceae|Staphylococcus|Staphylococcus aureus|Staphylococcus aureus subsp. aureus|Staphylococcus aureus subsp. aureus M899	0	0	0	0	0	0	0	0	0	0	0	0	0	0	0	0	0	0	0	0	0	0
Bacteria|Firmicutes|Bacilli|Bacillales|Staphylococcaceae|Staphylococcus|Staphylococcus aureus|Staphylococcus aureus subsp. aureus|Staphylococcus aureus subsp. aureus MN8	0	0	0	0	0	0	0	0	0	0	0	0	0	0	0	0	0	0	0	0	0	0
Bacteria|Firmicutes|Bacilli|Bacillales|Staphylococcaceae|Staphylococcus|Staphylococcus aureus|Staphylococcus aureus subsp. aureus|Staphylococcus aureus subsp. aureus MR1	0	0	0	0	0	0	0	0	0	0	0	0	0	0	0	0	0	0	0	0	0	0
Bacteria|Firmicutes|Bacilli|Bacillales|Staphylococcaceae|Staphylococcus|Staphylococcus aureus|Staphylococcus aureus subsp. aureus|Staphylococcus aureus subsp. aureus MRSA131	0	0	0	0	0	0	0	0	0	0	0	0	0	0	0	0	0	0	0	0	0	0
Bacteria|Firmicutes|Bacilli|Bacillales|Staphylococcaceae|Staphylococcus|Staphylococcus aureus|Staphylococcus aureus subsp. aureus|Staphylococcus aureus subsp. aureus MRSA177	0	0	0	0	0	0	0	0	0	0	0	0	0	0	0	0	0	0	0	0	0	0
Bacteria|Firmicutes|Bacilli|Bacillales|Staphylococcaceae|Staphylococcus|Staphylococcus aureus|Staphylococcus aureus subsp. aureus|Staphylococcus aureus subsp. aureus MRSA252	0	0	0	0	0	0	0	0	0	0	0	0	0	0	0	0	0	0	0	0	0	0
Bacteria|Firmicutes|Bacilli|Bacillales|Staphylococcaceae|Staphylococcus|Staphylococcus aureus|Staphylococcus aureus subsp. aureus|Staphylococcus aureus subsp. aureus MSHR1132	0	0	0	0	0	0	0	0	0	0	0	0	0	0	0	0	0	0	0	0	0	0
Bacteria|Firmicutes|Bacilli|Bacillales|Staphylococcaceae|Staphylococcus|Staphylococcus aureus|Staphylococcus aureus subsp. aureus|Staphylococcus aureus subsp. aureus MSSA476	0	0	1	0	0	0	0	0	0	0	0	0	0	0	0	0	0	0	0	0	0	0
Bacteria|Firmicutes|Bacilli|Bacillales|Staphylococcaceae|Staphylococcus|Staphylococcus aureus|Staphylococcus aureus subsp. aureus|Staphylococcus aureus subsp. aureus Mu3	0	0	0	0	0	0	0	0	0	0	0	0	0	0	0	0	0	0	0	0	0	0
Bacteria|Firmicutes|Bacilli|Bacillales|Staphylococcaceae|Staphylococcus|Staphylococcus aureus|Staphylococcus aureus subsp. aureus|Staphylococcus aureus subsp. aureus Mu50	0	0	0	0	0	0	0	0	0	0	0	0	0	0	0	0	0	0	0	0	0	0
Bacteria|Firmicutes|Bacilli|Bacillales|Staphylococcaceae|Staphylococcus|Staphylococcus aureus|Staphylococcus aureus subsp. aureus|Staphylococcus aureus subsp. aureus Mu50-omega	0	0	0	0	0	0	0	0	0	0	0	0	0	0	0	0	0	0	0	0	0	0
Bacteria|Firmicutes|Bacilli|Bacillales|Staphylococcaceae|Staphylococcus|Staphylococcus aureus|Staphylococcus aureus subsp. aureus|Staphylococcus aureus subsp. aureus MW2	0	0	0	0	0	0	0	0	0	0	0	0	0	0	0	0	0	0	0	0	0	0
Bacteria|Firmicutes|Bacilli|Bacillales|Staphylococcaceae|Staphylococcus|Staphylococcus aureus|Staphylococcus aureus subsp. aureus|Staphylococcus aureus subsp. aureus N315	0	0	0	0	0	0	0	0	0	0	0	0	0	0	0	0	0	0	0	0	0	0
Bacteria|Firmicutes|Bacilli|Bacillales|Staphylococcaceae|Staphylococcus|Staphylococcus aureus|Staphylococcus aureus subsp. aureus|Staphylococcus aureus subsp. aureus NCTC 8325	0	0	0	0	0	0	0	0	0	0	0	0	0	0	0	0	0	0	0	0	0	0
Bacteria|Firmicutes|Bacilli|Bacillales|Staphylococcaceae|Staphylococcus|Staphylococcus aureus|Staphylococcus aureus subsp. aureus|Staphylococcus aureus subsp. aureus ST398	0	0	0	0	1	0	0	0	0	0	0	0	0	0	0	0	0	0	0	0	0	0
Bacteria|Firmicutes|Bacilli|Bacillales|Staphylococcaceae|Staphylococcus|Staphylococcus aureus|Staphylococcus aureus subsp. aureus|Staphylococcus aureus subsp. aureus ST398|Staphylococcus aureus subsp. aureus 71193	0	0	0	0	0	0	0	0	0	0	0	0	0	0	0	0	0	0	0	0	0	0
Bacteria|Firmicutes|Bacilli|Bacillales|Staphylococcaceae|Staphylococcus|Staphylococcus aureus|Staphylococcus aureus subsp. aureus|Staphylococcus aureus subsp. aureus ST398|Staphylococcus aureus subsp. aureus DR10	0	0	0	0	0	0	0	0	0	0	0	0	0	0	0	0	0	0	0	0	0	0
Bacteria|Firmicutes|Bacilli|Bacillales|Staphylococcaceae|Staphylococcus|Staphylococcus aureus|Staphylococcus aureus subsp. aureus|Staphylococcus aureus subsp. aureus ST398|Staphylococcus aureus subsp. aureus S0385	0	0	0	0	0	0	0	0	0	0	0	0	0	0	0	0	0	0	0	0	0	0
Bacteria|Firmicutes|Bacilli|Bacillales|Staphylococcaceae|Staphylococcus|Staphylococcus aureus|Staphylococcus aureus subsp. aureus|Staphylococcus aureus subsp. aureus str. CF-Marseille	0	0	0	0	0	0	0	0	0	0	0	0	0	0	0	0	0	0	0	0	0	0
Bacteria|Firmicutes|Bacilli|Bacillales|Staphylococcaceae|Staphylococcus|Staphylococcus aureus|Staphylococcus aureus subsp. aureus|Staphylococcus aureus subsp. aureus str. JKD6008	0	0	0	0	0	0	0	0	0	0	0	0	0	0	0	0	0	0	0	0	0	0
Bacteria|Firmicutes|Bacilli|Bacillales|Staphylococcaceae|Staphylococcus|Staphylococcus aureus|Staphylococcus aureus subsp. aureus|Staphylococcus aureus subsp. aureus str. JKD6009	0	0	0	0	0	0	0	0	0	0	0	0	0	0	0	0	0	0	0	0	0	0
Bacteria|Firmicutes|Bacilli|Bacillales|Staphylococcaceae|Staphylococcus|Staphylococcus aureus|Staphylococcus aureus subsp. aureus|Staphylococcus aureus subsp. aureus str. Newman	0	0	0	0	0	0	0	0	0	0	0	0	0	0	0	0	0	0	0	0	0	0
Bacteria|Firmicutes|Bacilli|Bacillales|Staphylococcaceae|Staphylococcus|Staphylococcus aureus|Staphylococcus aureus subsp. aureus|Staphylococcus aureus subsp. aureus T0131	0	0	0	0	0	0	0	0	0	0	0	0	0	0	0	0	0	0	0	0	0	0
Bacteria|Firmicutes|Bacilli|Bacillales|Staphylococcaceae|Staphylococcus|Staphylococcus aureus|Staphylococcus aureus subsp. aureus|Staphylococcus aureus subsp. aureus TCH130	3	0	5	2	8	3	1	6	0	1	3	0	0	2	1	0	1	1	1	0	0	0
Bacteria|Firmicutes|Bacilli|Bacillales|Staphylococcaceae|Staphylococcus|Staphylococcus aureus|Staphylococcus aureus subsp. aureus|Staphylococcus aureus subsp. aureus TCH60	0	0	0	0	0	0	0	0	0	0	0	0	0	0	0	0	0	0	0	0	0	0
Bacteria|Firmicutes|Bacilli|Bacillales|Staphylococcaceae|Staphylococcus|Staphylococcus aureus|Staphylococcus aureus subsp. aureus|Staphylococcus aureus subsp. aureus TCH70	0	0	0	0	0	0	0	0	0	0	0	0	0	0	0	0	0	0	0	0	0	0
Bacteria|Firmicutes|Bacilli|Bacillales|Staphylococcaceae|Staphylococcus|Staphylococcus aureus|Staphylococcus aureus subsp. aureus|Staphylococcus aureus subsp. aureus TW20	0	0	0	0	0	0	0	0	0	0	0	0	0	0	0	0	0	0	0	0	0	0
Bacteria|Firmicutes|Bacilli|Bacillales|Staphylococcaceae|Staphylococcus|Staphylococcus aureus|Staphylococcus aureus subsp. aureus|Staphylococcus aureus subsp. aureus USA300|Staphylococcus aureus subsp. aureus USA300_FPR3757	0	0	0	0	0	0	0	0	0	0	0	0	0	0	0	0	0	0	0	0	0	0
Bacteria|Firmicutes|Bacilli|Bacillales|Staphylococcaceae|Staphylococcus|Staphylococcus aureus|Staphylococcus aureus subsp. aureus|Staphylococcus aureus subsp. aureus USA300|Staphylococcus aureus subsp. aureus USA300_TCH1516	0	0	0	0	0	0	0	0	0	0	0	0	0	0	0	0	0	0	0	0	0	0
Bacteria|Firmicutes|Bacilli|Bacillales|Staphylococcaceae|Staphylococcus|Staphylococcus aureus|Staphylococcus aureus subsp. aureus|Staphylococcus aureus subsp. aureus USA300|Staphylococcus aureus subsp. aureus USA300_TCH959	0	0	0	0	0	0	0	0	0	0	0	0	0	0	0	0	0	0	0	0	0	0
Bacteria|Firmicutes|Bacilli|Bacillales|Staphylococcaceae|Staphylococcus|Staphylococcus aureus|Staphylococcus aureus subsp. aureus|Staphylococcus aureus subsp. aureus VC40	2	0	1	1	2	0	0	0	0	0	0	0	0	0	0	0	0	0	0	0	0	0
Bacteria|Firmicutes|Bacilli|Bacillales|Staphylococcaceae|Staphylococcus|Staphylococcus aureus|Staphylococcus aureus subsp. aureus|Staphylococcus aureus subsp. aureus WBG10049	0	0	0	0	0	0	0	0	0	0	0	0	0	0	0	0	0	0	0	0	0	0
Bacteria|Firmicutes|Bacilli|Bacillales|Staphylococcaceae|Staphylococcus|Staphylococcus aureus|Staphylococcus aureus subsp. aureus|Staphylococcus aureus subsp. aureus WW2703/97	0	0	0	0	0	0	0	0	0	0	0	0	0	0	0	0	0	0	0	0	0	0
Bacteria|Firmicutes|Bacilli|Bacillales|Staphylococcaceae|Staphylococcus|Staphylococcus capitis|Staphylococcus capitis SK14	0	1	0	0	0	0	0	0	0	0	0	0	0	0	0	0	0	0	0	0	0	0
Bacteria|Firmicutes|Bacilli|Bacillales|Staphylococcaceae|Staphylococcus|Staphylococcus caprae|Staphylococcus caprae C87	0	0	0	0	0	0	0	0	0	0	0	0	0	0	0	0	0	0	0	0	0	0
Bacteria|Firmicutes|Bacilli|Bacillales|Staphylococcaceae|Staphylococcus|Staphylococcus caprae|Staphylococcus caprae M23864	0	0	0	0	0	0	0	0	0	0	0	0	0	0	0	0	0	0	0	0	0	0
Bacteria|Firmicutes|Bacilli|Bacillales|Staphylococcaceae|Staphylococcus|Staphylococcus carnosus|Staphylococcus carnosus subsp. carnosus|Staphylococcus carnosus subsp. carnosus TM300	1	0	0	0	0	0	0	0	0	0	0	0	0	0	0	0	0	0	0	0	0	0
Bacteria|Firmicutes|Bacilli|Bacillales|Staphylococcaceae|Staphylococcus|Staphylococcus epidermidis|Staphylococcus epidermidis 14.1.R1.SE	0	0	0	0	0	0	0	0	0	0	0	0	0	0	0	0	0	0	0	0	0	0
Bacteria|Firmicutes|Bacilli|Bacillales|Staphylococcaceae|Staphylococcus|Staphylococcus epidermidis|Staphylococcus epidermidis ATCC 12228	0	0	0	0	0	0	0	0	0	0	0	0	0	0	0	0	0	0	0	0	0	0
Bacteria|Firmicutes|Bacilli|Bacillales|Staphylococcaceae|Staphylococcus|Staphylococcus epidermidis|Staphylococcus epidermidis BCM-HMP0060	0	0	0	0	0	0	0	0	0	0	0	0	0	0	0	0	0	0	0	0	0	0
Bacteria|Firmicutes|Bacilli|Bacillales|Staphylococcaceae|Staphylococcus|Staphylococcus epidermidis|Staphylococcus epidermidis FRI909	0	0	0	0	0	0	0	0	0	0	0	0	0	0	0	0	0	0	0	0	0	0
Bacteria|Firmicutes|Bacilli|Bacillales|Staphylococcaceae|Staphylococcus|Staphylococcus epidermidis|Staphylococcus epidermidis IS-250	0	0	0	0	0	0	0	0	0	0	0	0	0	0	0	0	0	0	0	0	0	0
Bacteria|Firmicutes|Bacilli|Bacillales|Staphylococcaceae|Staphylococcus|Staphylococcus epidermidis|Staphylococcus epidermidis IS-K	0	0	0	0	0	0	0	0	0	0	0	0	0	0	0	0	0	0	0	0	0	0
Bacteria|Firmicutes|Bacilli|Bacillales|Staphylococcaceae|Staphylococcus|Staphylococcus epidermidis|Staphylococcus epidermidis M23864	0	0	0	0	0	0	0	0	0	0	0	0	0	0	0	0	0	0	0	0	0	0
Bacteria|Firmicutes|Bacilli|Bacillales|Staphylococcaceae|Staphylococcus|Staphylococcus epidermidis|Staphylococcus epidermidis NIH04003	0	0	0	0	0	0	0	0	0	0	0	0	0	0	0	0	0	0	0	0	0	0
Bacteria|Firmicutes|Bacilli|Bacillales|Staphylococcaceae|Staphylococcus|Staphylococcus epidermidis|Staphylococcus epidermidis NIH04008	0	0	0	0	0	0	0	0	0	0	0	0	0	0	0	0	0	0	0	0	0	0
Bacteria|Firmicutes|Bacilli|Bacillales|Staphylococcaceae|Staphylococcus|Staphylococcus epidermidis|Staphylococcus epidermidis NIH05001	0	0	0	0	0	0	0	0	0	0	0	0	0	0	0	0	0	0	0	0	0	0
Bacteria|Firmicutes|Bacilli|Bacillales|Staphylococcaceae|Staphylococcus|Staphylococcus epidermidis|Staphylococcus epidermidis NIH05003	0	0	0	0	0	0	0	0	0	0	0	0	0	0	0	0	0	0	0	0	0	0
Bacteria|Firmicutes|Bacilli|Bacillales|Staphylococcaceae|Staphylococcus|Staphylococcus epidermidis|Staphylococcus epidermidis NIH05005	0	0	0	0	0	0	0	0	0	0	0	0	0	0	0	0	0	0	0	0	0	0
Bacteria|Firmicutes|Bacilli|Bacillales|Staphylococcaceae|Staphylococcus|Staphylococcus epidermidis|Staphylococcus epidermidis NIH051475	0	0	0	0	0	0	0	0	0	0	0	0	0	0	0	0	0	0	0	0	0	0
Bacteria|Firmicutes|Bacilli|Bacillales|Staphylococcaceae|Staphylococcus|Staphylococcus epidermidis|Staphylococcus epidermidis NIH051668	0	0	0	0	0	0	0	0	0	0	0	0	0	0	0	0	0	0	0	0	0	0
Bacteria|Firmicutes|Bacilli|Bacillales|Staphylococcaceae|Staphylococcus|Staphylococcus epidermidis|Staphylococcus epidermidis NIH06004	0	0	0	0	0	0	0	0	0	0	0	0	0	0	0	0	0	0	0	0	0	0
Bacteria|Firmicutes|Bacilli|Bacillales|Staphylococcaceae|Staphylococcus|Staphylococcus epidermidis|Staphylococcus epidermidis NIH08001	0	0	0	0	0	0	0	0	0	0	0	0	0	0	0	0	0	0	0	0	0	0
Bacteria|Firmicutes|Bacilli|Bacillales|Staphylococcaceae|Staphylococcus|Staphylococcus epidermidis|Staphylococcus epidermidis NIHLM001	0	0	0	0	0	0	0	0	0	0	0	0	0	0	0	0	0	0	0	0	0	0
Bacteria|Firmicutes|Bacilli|Bacillales|Staphylococcaceae|Staphylococcus|Staphylococcus epidermidis|Staphylococcus epidermidis NIHLM003	0	0	0	0	0	0	0	0	0	0	0	0	0	0	0	0	0	0	0	0	0	0
Bacteria|Firmicutes|Bacilli|Bacillales|Staphylococcaceae|Staphylococcus|Staphylococcus epidermidis|Staphylococcus epidermidis NIHLM008	0	0	0	0	0	0	0	0	0	0	0	0	0	0	0	0	0	0	0	0	0	0
Bacteria|Firmicutes|Bacilli|Bacillales|Staphylococcaceae|Staphylococcus|Staphylococcus epidermidis|Staphylococcus epidermidis NIHLM015	0	0	0	0	1	0	0	0	0	0	0	0	0	0	0	0	0	0	0	0	0	0
Bacteria|Firmicutes|Bacilli|Bacillales|Staphylococcaceae|Staphylococcus|Staphylococcus epidermidis|Staphylococcus epidermidis NIHLM018	0	0	0	0	0	0	0	0	0	0	0	0	0	0	0	0	0	0	0	0	0	0
Bacteria|Firmicutes|Bacilli|Bacillales|Staphylococcaceae|Staphylococcus|Staphylococcus epidermidis|Staphylococcus epidermidis NIHLM020	0	0	0	0	0	0	0	0	0	0	0	0	0	0	0	0	0	0	0	0	0	0
Bacteria|Firmicutes|Bacilli|Bacillales|Staphylococcaceae|Staphylococcus|Staphylococcus epidermidis|Staphylococcus epidermidis NIHLM021	112	74	44	14	7	0	0	12	0	0	0	0	0	1	0	0	92	0	3	0	0	0
Bacteria|Firmicutes|Bacilli|Bacillales|Staphylococcaceae|Staphylococcus|Staphylococcus epidermidis|Staphylococcus epidermidis NIHLM023	0	0	0	0	0	0	0	0	0	0	0	0	0	0	0	0	0	0	0	0	0	0
Bacteria|Firmicutes|Bacilli|Bacillales|Staphylococcaceae|Staphylococcus|Staphylococcus epidermidis|Staphylococcus epidermidis NIHLM031	0	0	0	0	1	0	0	1	0	0	0	0	0	0	0	0	0	0	0	0	0	0
Bacteria|Firmicutes|Bacilli|Bacillales|Staphylococcaceae|Staphylococcus|Staphylococcus epidermidis|Staphylococcus epidermidis NIHLM037	0	0	0	0	0	0	0	0	0	0	0	0	0	0	0	0	0	0	0	0	0	0
Bacteria|Firmicutes|Bacilli|Bacillales|Staphylococcaceae|Staphylococcus|Staphylococcus epidermidis|Staphylococcus epidermidis NIHLM039	0	0	0	0	0	0	0	0	0	0	0	0	0	0	0	0	0	0	0	0	0	0
Bacteria|Firmicutes|Bacilli|Bacillales|Staphylococcaceae|Staphylococcus|Staphylococcus epidermidis|Staphylococcus epidermidis NIHLM040	1	0	0	0	0	0	0	0	0	0	0	0	0	0	0	0	0	0	0	0	0	0
Bacteria|Firmicutes|Bacilli|Bacillales|Staphylococcaceae|Staphylococcus|Staphylococcus epidermidis|Staphylococcus epidermidis NIHLM049	0	0	0	0	0	0	0	0	0	0	0	0	0	0	0	0	1	0	0	0	0	0
Bacteria|Firmicutes|Bacilli|Bacillales|Staphylococcaceae|Staphylococcus|Staphylococcus epidermidis|Staphylococcus epidermidis NIHLM053	3	0	0	2	0	0	0	2	0	0	0	0	0	0	0	0	1	0	0	0	0	1
Bacteria|Firmicutes|Bacilli|Bacillales|Staphylococcaceae|Staphylococcus|Staphylococcus epidermidis|Staphylococcus epidermidis NIHLM057	0	0	0	0	0	0	0	0	0	0	0	0	0	0	0	0	0	0	0	0	0	0
Bacteria|Firmicutes|Bacilli|Bacillales|Staphylococcaceae|Staphylococcus|Staphylococcus epidermidis|Staphylococcus epidermidis NIHLM061	0	0	0	0	0	0	0	0	0	0	0	0	0	0	0	0	0	0	0	0	0	0
Bacteria|Firmicutes|Bacilli|Bacillales|Staphylococcaceae|Staphylococcus|Staphylococcus epidermidis|Staphylococcus epidermidis NIHLM067	1	0	0	0	0	0	0	0	0	0	0	0	0	0	0	0	0	0	0	0	0	0
Bacteria|Firmicutes|Bacilli|Bacillales|Staphylococcaceae|Staphylococcus|Staphylococcus epidermidis|Staphylococcus epidermidis NIHLM070	0	0	0	0	0	0	0	0	0	0	0	0	0	0	0	0	0	0	0	0	0	0
Bacteria|Firmicutes|Bacilli|Bacillales|Staphylococcaceae|Staphylococcus|Staphylococcus epidermidis|Staphylococcus epidermidis NIHLM087	0	0	0	0	0	0	0	0	0	0	0	0	0	0	0	0	0	0	0	0	0	0
Bacteria|Firmicutes|Bacilli|Bacillales|Staphylococcaceae|Staphylococcus|Staphylococcus epidermidis|Staphylococcus epidermidis NIHLM088	1	1	0	1	0	0	0	0	0	0	0	0	0	0	0	0	0	0	0	0	0	0
Bacteria|Firmicutes|Bacilli|Bacillales|Staphylococcaceae|Staphylococcus|Staphylococcus epidermidis|Staphylococcus epidermidis NIHLM095	0	0	0	0	0	0	0	0	0	0	0	0	0	0	0	0	0	0	0	0	0	0
Bacteria|Firmicutes|Bacilli|Bacillales|Staphylococcaceae|Staphylococcus|Staphylococcus epidermidis|Staphylococcus epidermidis RP62A	1	0	1	1	0	0	0	0	0	0	0	0	0	0	0	0	0	0	0	0	0	0
Bacteria|Firmicutes|Bacilli|Bacillales|Staphylococcaceae|Staphylococcus|Staphylococcus epidermidis|Staphylococcus epidermidis SK135	0	0	0	0	0	0	0	0	0	0	0	0	0	0	0	0	0	0	0	0	0	0
Bacteria|Firmicutes|Bacilli|Bacillales|Staphylococcaceae|Staphylococcus|Staphylococcus epidermidis|Staphylococcus epidermidis W23144	0	0	0	0	0	0	0	0	0	0	0	0	0	0	0	0	0	0	0	0	0	0
Bacteria|Firmicutes|Bacilli|Bacillales|Staphylococcaceae|Staphylococcus|Staphylococcus haemolyticus|Staphylococcus haemolyticus JCSC1435	1	4	0	0	0	0	0	2	0	0	0	0	0	0	0	0	0	0	0	0	0	0
Bacteria|Firmicutes|Bacilli|Bacillales|Staphylococcaceae|Staphylococcus|Staphylococcus hominis|Staphylococcus hominis SK119	4	0	0	0	2	0	0	4	0	0	1	0	0	0	0	0	1	0	0	0	0	0
Bacteria|Firmicutes|Bacilli|Bacillales|Staphylococcaceae|Staphylococcus|Staphylococcus hominis|Staphylococcus hominis subsp. hominis|Staphylococcus hominis subsp. hominis C80	3	2	0	1	0	0	0	5	0	0	0	0	0	0	0	0	3	0	0	0	0	0
Bacteria|Firmicutes|Bacilli|Bacillales|Staphylococcaceae|Staphylococcus|Staphylococcus hominis|Staphylococcus hominis subsp. hominis|Staphylococcus hominis subsp. hominis ZBW5	3	0	2	0	1	0	0	3	0	0	0	0	0	0	0	0	0	0	0	0	0	0
Bacteria|Firmicutes|Bacilli|Bacillales|Staphylococcaceae|Staphylococcus|Staphylococcus lugdunensis|Staphylococcus lugdunensis HKU09-01	0	0	0	0	0	0	0	0	0	0	0	0	0	0	0	0	0	0	0	0	0	0
Bacteria|Firmicutes|Bacilli|Bacillales|Staphylococcaceae|Staphylococcus|Staphylococcus lugdunensis|Staphylococcus lugdunensis M23590	0	0	0	0	0	0	0	0	0	0	0	0	0	0	0	0	0	0	0	0	0	0
Bacteria|Firmicutes|Bacilli|Bacillales|Staphylococcaceae|Staphylococcus|Staphylococcus lugdunensis|Staphylococcus lugdunensis N920143	0	0	0	0	0	0	0	0	0	0	0	0	0	0	0	0	0	0	0	0	0	0
Bacteria|Firmicutes|Bacilli|Bacillales|Staphylococcaceae|Staphylococcus|Staphylococcus pseudintermedius|Staphylococcus pseudintermedius ED99	0	0	0	0	0	0	0	0	0	0	0	0	0	0	0	0	0	0	0	0	0	0
Bacteria|Firmicutes|Bacilli|Bacillales|Staphylococcaceae|Staphylococcus|Staphylococcus pseudintermedius|Staphylococcus pseudintermedius HKU10-03	0	0	0	0	0	0	0	0	0	0	0	0	0	0	0	0	0	0	0	0	0	0
Bacteria|Firmicutes|Bacilli|Bacillales|Staphylococcaceae|Staphylococcus|Staphylococcus saprophyticus|Staphylococcus saprophyticus subsp. saprophyticus|Staphylococcus saprophyticus subsp. saprophyticus ATCC 15305	25	8	21	10	10	0	0	14	0	0	0	1	0	2	0	0	6	1	0	1	0	0
Bacteria|Firmicutes|Bacilli|Bacillales|Staphylococcaceae|Staphylococcus|Staphylococcus simiae|Staphylococcus simiae CCM 7213	0	0	0	0	0	0	0	0	0	0	0	0	0	0	0	0	0	0	0	0	0	0
Bacteria|Firmicutes|Bacilli|Bacillales|Staphylococcaceae|Staphylococcus|Staphylococcus warneri|Staphylococcus warneri L37603	4	0	0	0	0	0	0	1	0	0	0	0	0	0	0	0	0	0	0	0	0	0
Bacteria|Firmicutes|Bacilli|Bacillales|Thermoactinomycetaceae|Desmospora|Desmospora sp. 8437	0	0	0	0	0	0	0	0	1	0	0	0	0	0	0	0	0	0	0	0	0	0
Bacteria|Firmicutes|Bacilli|Lactobacillales|Aerococcaceae|Abiotrophia|Abiotrophia defectiva|Abiotrophia defectiva ATCC 49176	0	0	0	0	0	0	0	0	0	0	0	0	0	0	0	0	0	0	0	0	0	0
Bacteria|Firmicutes|Bacilli|Lactobacillales|Aerococcaceae|Aerococcus|Aerococcus urinae|Aerococcus urinae ACS-120-V-Col10a	0	0	0	0	0	0	0	0	0	0	0	0	0	0	0	0	0	0	0	0	0	0
Bacteria|Firmicutes|Bacilli|Lactobacillales|Aerococcaceae|Aerococcus|Aerococcus viridans|Aerococcus viridans ATCC 11563	66	21	20	20	26	0	0	4	0	1	2	0	0	4	0	0	10	3	0	0	0	0
Bacteria|Firmicutes|Bacilli|Lactobacillales|Aerococcaceae|Aerococcus|Aerococcus viridans|Aerococcus viridans LL1	27	19	17	10	14	0	0	1	0	0	1	0	0	2	0	0	2	3	0	0	0	0
Bacteria|Firmicutes|Bacilli|Lactobacillales|Aerococcaceae|Eremococcus|Eremococcus coleocola|Eremococcus coleocola ACS-139-V-Col8	0	0	0	0	0	0	0	0	0	0	0	0	0	0	0	0	0	0	0	0	0	0
Bacteria|Firmicutes|Bacilli|Lactobacillales|Aerococcaceae|Facklamia|Facklamia languida|Facklamia languida CCUG 37842	1	0	0	0	0	0	0	0	0	0	0	0	0	0	0	0	0	0	0	0	0	0
Bacteria|Firmicutes|Bacilli|Lactobacillales|Carnobacteriaceae|Carnobacterium|Carnobacterium sp. 17-4	0	0	0	0	0	0	0	0	0	0	0	0	0	0	0	0	0	0	0	0	0	0
Bacteria|Firmicutes|Bacilli|Lactobacillales|Carnobacteriaceae|Carnobacterium|Carnobacterium sp. AT7	0	0	0	0	0	0	0	0	0	0	0	0	0	0	0	0	0	0	0	0	0	0
Bacteria|Firmicutes|Bacilli|Lactobacillales|Carnobacteriaceae|Dolosigranulum|Dolosigranulum pigrum|Dolosigranulum pigrum ATCC 51524	0	0	0	0	0	0	0	0	0	0	0	0	0	0	0	0	0	0	0	0	0	0
Bacteria|Firmicutes|Bacilli|Lactobacillales|Carnobacteriaceae|Granulicatella|Granulicatella adiacens|Granulicatella adiacens ATCC 49175	4	1	0	0	0	0	0	1	0	0	0	0	0	0	0	0	0	0	0	0	0	0
Bacteria|Firmicutes|Bacilli|Lactobacillales|Carnobacteriaceae|Granulicatella|Granulicatella elegans|Granulicatella elegans ATCC 700633	0	0	0	0	0	0	0	0	0	0	0	0	0	0	0	0	0	0	0	0	0	0
Bacteria|Firmicutes|Bacilli|Lactobacillales|Enterococcaceae|Enterococcus|Enterococcus casseliflavus|Enterococcus casseliflavus ATCC 12755	14	6	9	4	1	0	1	15	0	0	0	0	0	2	0	0	9	5	0	0	0	1
Bacteria|Firmicutes|Bacilli|Lactobacillales|Enterococcaceae|Enterococcus|Enterococcus casseliflavus|Enterococcus casseliflavus EC10	0	0	0	0	0	0	0	0	0	0	0	0	0	0	0	0	0	0	0	0	0	0
Bacteria|Firmicutes|Bacilli|Lactobacillales|Enterococcaceae|Enterococcus|Enterococcus casseliflavus|Enterococcus casseliflavus EC20	2	0	5	0	1	0	0	2	0	0	0	0	0	1	0	0	0	1	0	0	0	0
Bacteria|Firmicutes|Bacilli|Lactobacillales|Enterococcaceae|Enterococcus|Enterococcus casseliflavus|Enterococcus casseliflavus EC30	0	0	0	0	0	0	0	0	0	0	0	0	0	0	0	0	0	0	0	0	0	0
Bacteria|Firmicutes|Bacilli|Lactobacillales|Enterococcaceae|Enterococcus|Enterococcus faecalis|Enterococcus faecalis 599	33	11	15	13	3	0	0	7	0	1	0	0	0	0	0	0	4	0	0	0	0	0
Bacteria|Firmicutes|Bacilli|Lactobacillales|Enterococcaceae|Enterococcus|Enterococcus faecalis|Enterococcus faecalis 62	0	1	0	0	0	0	0	0	0	0	0	0	0	0	0	0	0	0	0	0	0	0
Bacteria|Firmicutes|Bacilli|Lactobacillales|Enterococcaceae|Enterococcus|Enterococcus faecalis|Enterococcus faecalis ARO1/DG	0	0	0	1	0	0	0	0	0	0	0	0	0	0	0	0	0	0	0	0	0	0
Bacteria|Firmicutes|Bacilli|Lactobacillales|Enterococcaceae|Enterococcus|Enterococcus faecalis|Enterococcus faecalis ATCC 29200	0	0	0	0	0	0	0	0	0	0	0	0	0	0	0	0	0	0	0	0	0	0
Bacteria|Firmicutes|Bacilli|Lactobacillales|Enterococcaceae|Enterococcus|Enterococcus faecalis|Enterococcus faecalis ATCC 4200	0	0	0	0	0	0	0	0	0	0	0	0	0	0	0	0	0	0	0	0	0	0
Bacteria|Firmicutes|Bacilli|Lactobacillales|Enterococcaceae|Enterococcus|Enterococcus faecalis|Enterococcus faecalis CH188	0	0	0	0	0	0	0	0	0	0	0	0	0	0	0	0	0	0	0	0	0	0
Bacteria|Firmicutes|Bacilli|Lactobacillales|Enterococcaceae|Enterococcus|Enterococcus faecalis|Enterococcus faecalis D32	0	0	0	0	0	0	0	0	0	0	0	0	0	0	0	0	0	0	0	0	0	0
Bacteria|Firmicutes|Bacilli|Lactobacillales|Enterococcaceae|Enterococcus|Enterococcus faecalis|Enterococcus faecalis D6	1	1	2	0	1	0	0	0	0	0	0	0	0	0	0	0	0	0	0	0	0	0
Bacteria|Firmicutes|Bacilli|Lactobacillales|Enterococcaceae|Enterococcus|Enterococcus faecalis|Enterococcus faecalis DAPTO 512	0	0	0	0	0	0	0	0	0	0	0	0	0	0	0	0	0	0	0	0	0	0
Bacteria|Firmicutes|Bacilli|Lactobacillales|Enterococcaceae|Enterococcus|Enterococcus faecalis|Enterococcus faecalis DAPTO 516	0	0	0	0	0	0	0	0	0	0	0	0	0	0	0	0	0	0	0	0	0	0
Bacteria|Firmicutes|Bacilli|Lactobacillales|Enterococcaceae|Enterococcus|Enterococcus faecalis|Enterococcus faecalis DS5	7	2	3	4	3	0	0	10	0	0	0	0	0	0	0	0	3	0	0	0	0	0
Bacteria|Firmicutes|Bacilli|Lactobacillales|Enterococcaceae|Enterococcus|Enterococcus faecalis|Enterococcus faecalis E1Sol	0	0	0	0	0	0	0	0	0	0	0	0	0	0	0	0	0	0	0	0	0	0
Bacteria|Firmicutes|Bacilli|Lactobacillales|Enterococcaceae|Enterococcus|Enterococcus faecalis|Enterococcus faecalis EnGen0297	0	0	0	0	0	0	0	0	0	0	0	0	0	0	0	0	0	0	0	0	0	0
Bacteria|Firmicutes|Bacilli|Lactobacillales|Enterococcaceae|Enterococcus|Enterococcus faecalis|Enterococcus faecalis EnGen0311	0	0	0	0	0	0	0	0	0	0	0	0	0	0	0	0	0	0	0	0	0	0
Bacteria|Firmicutes|Bacilli|Lactobacillales|Enterococcaceae|Enterococcus|Enterococcus faecalis|Enterococcus faecalis ERV103	0	0	0	0	0	0	0	0	0	0	0	0	0	0	0	0	0	0	0	0	0	0
Bacteria|Firmicutes|Bacilli|Lactobacillales|Enterococcaceae|Enterococcus|Enterococcus faecalis|Enterococcus faecalis ERV116	0	0	0	0	0	0	0	0	0	0	0	0	0	0	0	0	0	0	0	0	0	0
Bacteria|Firmicutes|Bacilli|Lactobacillales|Enterococcaceae|Enterococcus|Enterococcus faecalis|Enterococcus faecalis ERV129	0	0	0	0	0	0	0	0	0	0	0	0	0	0	0	0	0	0	0	0	0	0
Bacteria|Firmicutes|Bacilli|Lactobacillales|Enterococcaceae|Enterococcus|Enterococcus faecalis|Enterococcus faecalis ERV25	0	0	0	0	0	0	0	0	0	0	0	0	0	0	0	0	0	0	0	0	0	0
Bacteria|Firmicutes|Bacilli|Lactobacillales|Enterococcaceae|Enterococcus|Enterococcus faecalis|Enterococcus faecalis ERV31	0	0	0	0	0	0	0	0	0	0	0	0	0	0	0	0	0	0	0	0	0	0
Bacteria|Firmicutes|Bacilli|Lactobacillales|Enterococcaceae|Enterococcus|Enterococcus faecalis|Enterococcus faecalis ERV37	0	0	0	0	0	0	0	0	0	0	0	0	0	0	0	0	0	0	0	0	0	0
Bacteria|Firmicutes|Bacilli|Lactobacillales|Enterococcaceae|Enterococcus|Enterococcus faecalis|Enterococcus faecalis ERV41	0	0	0	0	0	0	0	0	0	0	0	0	0	0	0	0	0	0	0	0	0	0
Bacteria|Firmicutes|Bacilli|Lactobacillales|Enterococcaceae|Enterococcus|Enterococcus faecalis|Enterococcus faecalis ERV62	0	0	0	0	0	0	0	0	0	0	0	0	0	0	0	0	0	0	0	0	0	0
Bacteria|Firmicutes|Bacilli|Lactobacillales|Enterococcaceae|Enterococcus|Enterococcus faecalis|Enterococcus faecalis ERV63	0	0	0	0	0	0	0	0	0	0	0	0	0	0	0	0	0	0	0	0	0	0
Bacteria|Firmicutes|Bacilli|Lactobacillales|Enterococcaceae|Enterococcus|Enterococcus faecalis|Enterococcus faecalis ERV65	0	0	0	0	0	0	0	0	0	0	0	0	0	0	0	0	0	0	0	0	0	0
Bacteria|Firmicutes|Bacilli|Lactobacillales|Enterococcaceae|Enterococcus|Enterococcus faecalis|Enterococcus faecalis ERV68	0	0	0	0	0	0	0	0	0	0	0	0	0	0	0	0	0	0	0	0	0	0
Bacteria|Firmicutes|Bacilli|Lactobacillales|Enterococcaceae|Enterococcus|Enterococcus faecalis|Enterococcus faecalis ERV72	0	0	0	0	0	0	0	0	0	0	0	0	0	0	0	0	0	0	0	0	0	0
Bacteria|Firmicutes|Bacilli|Lactobacillales|Enterococcaceae|Enterococcus|Enterococcus faecalis|Enterococcus faecalis ERV73	0	0	0	0	0	0	0	0	0	0	0	0	0	0	0	0	0	0	0	0	0	0
Bacteria|Firmicutes|Bacilli|Lactobacillales|Enterococcaceae|Enterococcus|Enterococcus faecalis|Enterococcus faecalis ERV81	0	0	0	0	0	0	0	0	0	0	0	0	0	0	0	0	0	0	0	0	0	0
Bacteria|Firmicutes|Bacilli|Lactobacillales|Enterococcaceae|Enterococcus|Enterococcus faecalis|Enterococcus faecalis ERV85	0	0	0	0	0	0	0	0	0	0	0	0	0	0	0	0	0	0	0	0	0	0
Bacteria|Firmicutes|Bacilli|Lactobacillales|Enterococcaceae|Enterococcus|Enterococcus faecalis|Enterococcus faecalis ERV93	0	0	0	0	0	0	0	0	0	0	0	0	0	0	0	0	0	0	0	0	0	0
Bacteria|Firmicutes|Bacilli|Lactobacillales|Enterococcaceae|Enterococcus|Enterococcus faecalis|Enterococcus faecalis Fly1	0	0	0	0	0	0	0	0	0	0	0	0	0	0	0	0	0	0	0	0	0	0
Bacteria|Firmicutes|Bacilli|Lactobacillales|Enterococcaceae|Enterococcus|Enterococcus faecalis|Enterococcus faecalis HIP11704	2	1	0	0	0	0	0	0	0	0	0	0	0	0	0	0	0	0	0	0	0	0
Bacteria|Firmicutes|Bacilli|Lactobacillales|Enterococcaceae|Enterococcus|Enterococcus faecalis|Enterococcus faecalis JH1	1	1	0	0	0	0	0	0	0	0	0	0	0	0	0	0	0	0	0	0	0	0
Bacteria|Firmicutes|Bacilli|Lactobacillales|Enterococcaceae|Enterococcus|Enterococcus faecalis|Enterococcus faecalis Merz96	0	0	0	0	0	0	0	0	0	0	0	0	0	0	0	0	0	0	0	0	0	0
Bacteria|Firmicutes|Bacilli|Lactobacillales|Enterococcaceae|Enterococcus|Enterococcus faecalis|Enterococcus faecalis OG1RF	0	0	0	0	0	0	0	0	0	0	0	0	0	0	0	0	0	0	0	0	0	0
Bacteria|Firmicutes|Bacilli|Lactobacillales|Enterococcaceae|Enterococcus|Enterococcus faecalis|Enterococcus faecalis PC1.1	0	0	0	0	0	0	0	0	0	0	0	0	0	0	0	0	0	0	0	0	0	0
Bacteria|Firmicutes|Bacilli|Lactobacillales|Enterococcaceae|Enterococcus|Enterococcus faecalis|Enterococcus faecalis R508	0	0	0	0	0	0	0	0	0	0	0	0	0	0	0	0	0	0	0	0	0	0
Bacteria|Firmicutes|Bacilli|Lactobacillales|Enterococcaceae|Enterococcus|Enterococcus faecalis|Enterococcus faecalis R712	0	0	0	0	0	0	0	0	0	0	0	0	0	0	0	0	0	0	0	0	0	0
Bacteria|Firmicutes|Bacilli|Lactobacillales|Enterococcaceae|Enterococcus|Enterococcus faecalis|Enterococcus faecalis S613	0	0	0	0	0	0	0	0	0	0	0	0	0	0	0	0	0	0	0	0	0	0
Bacteria|Firmicutes|Bacilli|Lactobacillales|Enterococcaceae|Enterococcus|Enterococcus faecalis|Enterococcus faecalis T1	2	0	0	0	0	0	0	0	0	0	0	0	0	0	0	0	0	0	0	0	0	0
Bacteria|Firmicutes|Bacilli|Lactobacillales|Enterococcaceae|Enterococcus|Enterococcus faecalis|Enterococcus faecalis T11	0	2	0	0	0	0	0	0	0	0	0	0	0	0	0	0	0	0	0	0	0	0
Bacteria|Firmicutes|Bacilli|Lactobacillales|Enterococcaceae|Enterococcus|Enterococcus faecalis|Enterococcus faecalis T2	0	0	0	0	0	0	0	0	0	0	0	0	0	0	0	0	0	0	0	0	0	0
Bacteria|Firmicutes|Bacilli|Lactobacillales|Enterococcaceae|Enterococcus|Enterococcus faecalis|Enterococcus faecalis T3	0	1	0	0	0	0	0	0	0	0	0	0	0	0	0	0	0	0	0	0	0	0
Bacteria|Firmicutes|Bacilli|Lactobacillales|Enterococcaceae|Enterococcus|Enterococcus faecalis|Enterococcus faecalis T8	27	13	6	7	5	0	0	7	0	0	1	0	0	0	0	0	8	0	0	0	0	0
Bacteria|Firmicutes|Bacilli|Lactobacillales|Enterococcaceae|Enterococcus|Enterococcus faecalis|Enterococcus faecalis TUSoD Ef11	0	0	0	0	1	0	0	0	0	0	0	0	0	0	0	0	0	0	0	0	0	0
Bacteria|Firmicutes|Bacilli|Lactobacillales|Enterococcaceae|Enterococcus|Enterococcus faecalis|Enterococcus faecalis TX0012	0	0	0	0	0	0	0	0	0	0	0	0	0	0	0	0	0	0	0	0	0	0
Bacteria|Firmicutes|Bacilli|Lactobacillales|Enterococcaceae|Enterococcus|Enterococcus faecalis|Enterococcus faecalis TX0017	0	0	0	0	0	0	0	0	0	0	0	0	0	0	0	0	0	0	0	0	0	0
Bacteria|Firmicutes|Bacilli|Lactobacillales|Enterococcaceae|Enterococcus|Enterococcus faecalis|Enterococcus faecalis TX0027	0	0	0	0	0	0	0	0	0	0	0	0	0	0	0	0	0	0	0	0	0	0
Bacteria|Firmicutes|Bacilli|Lactobacillales|Enterococcaceae|Enterococcus|Enterococcus faecalis|Enterococcus faecalis TX0031	0	0	0	0	0	0	0	0	0	0	0	0	0	0	0	0	0	0	0	0	0	0
Bacteria|Firmicutes|Bacilli|Lactobacillales|Enterococcaceae|Enterococcus|Enterococcus faecalis|Enterococcus faecalis TX0043	48	32	47	12	2	0	0	25	0	0	0	0	0	1	0	0	25	0	1	0	0	0
Bacteria|Firmicutes|Bacilli|Lactobacillales|Enterococcaceae|Enterococcus|Enterococcus faecalis|Enterococcus faecalis TX0102	0	0	0	0	0	0	0	0	0	0	0	0	0	0	0	0	0	0	0	0	0	0
Bacteria|Firmicutes|Bacilli|Lactobacillales|Enterococcaceae|Enterococcus|Enterococcus faecalis|Enterococcus faecalis TX0104	0	0	0	0	0	0	0	0	0	0	0	0	0	0	0	0	0	0	0	0	0	0
Bacteria|Firmicutes|Bacilli|Lactobacillales|Enterococcaceae|Enterococcus|Enterococcus faecalis|Enterococcus faecalis TX0109	27	28	10	4	1	0	0	7	0	0	0	0	0	0	0	0	8	0	0	0	0	0
Bacteria|Firmicutes|Bacilli|Lactobacillales|Enterococcaceae|Enterococcus|Enterococcus faecalis|Enterococcus faecalis TX0309A	0	0	0	0	0	0	0	0	0	0	0	0	0	0	0	0	0	0	0	0	0	0
Bacteria|Firmicutes|Bacilli|Lactobacillales|Enterococcaceae|Enterococcus|Enterococcus faecalis|Enterococcus faecalis TX0309B	0	0	0	0	0	0	0	0	0	0	0	0	0	0	0	0	0	0	0	0	0	0
Bacteria|Firmicutes|Bacilli|Lactobacillales|Enterococcaceae|Enterococcus|Enterococcus faecalis|Enterococcus faecalis TX0312	0	0	0	0	0	0	0	0	0	0	0	0	0	0	0	0	0	0	0	0	0	0
Bacteria|Firmicutes|Bacilli|Lactobacillales|Enterococcaceae|Enterococcus|Enterococcus faecalis|Enterococcus faecalis TX0411	0	0	0	0	0	0	0	0	0	0	0	0	0	0	0	0	0	0	0	0	0	0
Bacteria|Firmicutes|Bacilli|Lactobacillales|Enterococcaceae|Enterococcus|Enterococcus faecalis|Enterococcus faecalis TX0470	0	0	0	0	0	0	0	0	0	0	0	0	0	0	0	0	0	0	0	0	0	0
Bacteria|Firmicutes|Bacilli|Lactobacillales|Enterococcaceae|Enterococcus|Enterococcus faecalis|Enterococcus faecalis TX0630	0	0	0	0	0	0	0	0	0	0	0	0	0	0	0	0	0	0	0	0	0	0
Bacteria|Firmicutes|Bacilli|Lactobacillales|Enterococcaceae|Enterococcus|Enterococcus faecalis|Enterococcus faecalis TX0645	0	0	0	0	0	0	0	1	0	0	0	0	0	0	0	0	0	0	0	0	0	0
Bacteria|Firmicutes|Bacilli|Lactobacillales|Enterococcaceae|Enterococcus|Enterococcus faecalis|Enterococcus faecalis TX0855	70	34	27	10	4	0	0	7	0	0	0	0	0	1	0	0	6	0	0	0	0	0
Bacteria|Firmicutes|Bacilli|Lactobacillales|Enterococcaceae|Enterococcus|Enterococcus faecalis|Enterococcus faecalis TX0860	0	0	1	0	0	0	0	0	0	0	0	0	0	0	0	0	0	0	0	0	0	0
Bacteria|Firmicutes|Bacilli|Lactobacillales|Enterococcaceae|Enterococcus|Enterococcus faecalis|Enterococcus faecalis TX1302	0	0	0	0	0	0	0	0	0	0	0	0	0	0	0	0	1	0	0	0	0	0
Bacteria|Firmicutes|Bacilli|Lactobacillales|Enterococcaceae|Enterococcus|Enterococcus faecalis|Enterococcus faecalis TX1322	0	0	0	0	0	0	0	0	0	0	0	0	0	0	0	0	0	0	0	0	0	0
Bacteria|Firmicutes|Bacilli|Lactobacillales|Enterococcaceae|Enterococcus|Enterococcus faecalis|Enterococcus faecalis TX1341	0	0	0	0	0	0	0	0	0	0	0	0	0	0	0	0	0	0	0	0	0	0
Bacteria|Firmicutes|Bacilli|Lactobacillales|Enterococcaceae|Enterococcus|Enterococcus faecalis|Enterococcus faecalis TX1342	0	0	0	0	0	0	0	0	0	0	0	0	0	1	0	0	0	0	0	0	0	0
Bacteria|Firmicutes|Bacilli|Lactobacillales|Enterococcaceae|Enterococcus|Enterococcus faecalis|Enterococcus faecalis TX1346	13	2	0	0	1	0	0	1	0	0	0	0	0	0	0	0	1	0	0	0	0	0
Bacteria|Firmicutes|Bacilli|Lactobacillales|Enterococcaceae|Enterococcus|Enterococcus faecalis|Enterococcus faecalis TX1467	0	0	0	0	0	0	0	0	0	0	0	0	0	0	0	0	0	0	0	0	0	0
Bacteria|Firmicutes|Bacilli|Lactobacillales|Enterococcaceae|Enterococcus|Enterococcus faecalis|Enterococcus faecalis TX2134	0	2	0	0	0	0	0	0	0	0	0	0	0	0	0	0	0	0	0	0	0	0
Bacteria|Firmicutes|Bacilli|Lactobacillales|Enterococcaceae|Enterococcus|Enterococcus faecalis|Enterococcus faecalis TX2137	0	0	0	0	0	0	0	0	0	0	0	0	0	0	0	0	0	0	0	0	0	0
Bacteria|Firmicutes|Bacilli|Lactobacillales|Enterococcaceae|Enterococcus|Enterococcus faecalis|Enterococcus faecalis TX2141	3	1	0	0	1	0	0	0	0	0	0	0	0	0	0	0	1	0	0	0	0	0
Bacteria|Firmicutes|Bacilli|Lactobacillales|Enterococcaceae|Enterococcus|Enterococcus faecalis|Enterococcus faecalis TX4000	0	0	0	0	0	0	0	0	0	0	0	0	0	0	0	0	0	0	0	0	0	0
Bacteria|Firmicutes|Bacilli|Lactobacillales|Enterococcaceae|Enterococcus|Enterococcus faecalis|Enterococcus faecalis TX4244	0	0	0	0	0	0	0	0	0	0	0	0	0	0	0	0	0	0	0	0	0	0
Bacteria|Firmicutes|Bacilli|Lactobacillales|Enterococcaceae|Enterococcus|Enterococcus faecalis|Enterococcus faecalis TX4248	23	12	1	2	2	0	0	1	0	0	3	0	0	0	0	0	5	0	0	0	0	0
Bacteria|Firmicutes|Bacilli|Lactobacillales|Enterococcaceae|Enterococcus|Enterococcus faecalis|Enterococcus faecalis V583	0	0	0	0	0	0	0	0	0	0	0	0	0	0	0	0	0	0	0	0	0	0
Bacteria|Firmicutes|Bacilli|Lactobacillales|Enterococcaceae|Enterococcus|Enterococcus faecalis|Enterococcus faecalis X98	0	0	0	0	0	0	0	0	0	0	0	0	0	0	0	0	0	0	0	0	0	0
Bacteria|Firmicutes|Bacilli|Lactobacillales|Enterococcaceae|Enterococcus|Enterococcus faecium|Enterococcus faecium 1,141,733	13	4	5	7	2	0	0	20	0	0	1	0	0	0	0	0	10	0	0	0	0	0
Bacteria|Firmicutes|Bacilli|Lactobacillales|Enterococcaceae|Enterococcus|Enterococcus faecium|Enterococcus faecium 1,230,933	1	1	5	1	0	0	0	1	0	0	0	0	0	0	0	0	0	0	0	0	0	0
Bacteria|Firmicutes|Bacilli|Lactobacillales|Enterococcaceae|Enterococcus|Enterococcus faecium|Enterococcus faecium 1,231,408	0	1	0	0	0	0	0	1	0	0	0	0	0	0	0	0	2	0	0	0	0	0
Bacteria|Firmicutes|Bacilli|Lactobacillales|Enterococcaceae|Enterococcus|Enterococcus faecium|Enterococcus faecium 1,231,410	0	0	0	0	0	0	0	0	0	0	0	0	0	0	0	0	0	0	0	0	0	0
Bacteria|Firmicutes|Bacilli|Lactobacillales|Enterococcaceae|Enterococcus|Enterococcus faecium|Enterococcus faecium 1,231,501	5	8	1	2	0	0	0	10	0	0	0	0	0	0	0	0	2	0	0	0	0	0
Bacteria|Firmicutes|Bacilli|Lactobacillales|Enterococcaceae|Enterococcus|Enterococcus faecium|Enterococcus faecium 1,231,502	0	0	0	0	0	0	0	1	0	0	0	0	0	0	0	0	0	0	0	0	0	0
Bacteria|Firmicutes|Bacilli|Lactobacillales|Enterococcaceae|Enterococcus|Enterococcus faecium|Enterococcus faecium 503	0	0	0	0	0	0	0	0	0	0	0	0	0	0	0	0	0	0	0	0	0	0
Bacteria|Firmicutes|Bacilli|Lactobacillales|Enterococcaceae|Enterococcus|Enterococcus faecium|Enterococcus faecium 504	625	334	114	33	8	0	2	118	0	0	3	0	0	4	0	0	287	0	7	0	0	1
Bacteria|Firmicutes|Bacilli|Lactobacillales|Enterococcaceae|Enterococcus|Enterococcus faecium|Enterococcus faecium 505	8	5	7	7	3	0	0	3	0	0	0	0	0	0	0	0	5	0	0	0	0	0
Bacteria|Firmicutes|Bacilli|Lactobacillales|Enterococcaceae|Enterococcus|Enterococcus faecium|Enterococcus faecium 506	1	1	1	0	0	0	0	0	0	0	0	0	0	0	0	0	0	0	0	0	0	0
Bacteria|Firmicutes|Bacilli|Lactobacillales|Enterococcaceae|Enterococcus|Enterococcus faecium|Enterococcus faecium 509	0	0	0	0	0	0	0	0	0	0	0	0	0	0	0	0	0	0	0	0	0	0
Bacteria|Firmicutes|Bacilli|Lactobacillales|Enterococcaceae|Enterococcus|Enterococcus faecium|Enterococcus faecium 510	0	0	0	0	0	0	0	0	0	0	0	0	0	0	0	0	0	0	0	0	0	0
Bacteria|Firmicutes|Bacilli|Lactobacillales|Enterococcaceae|Enterococcus|Enterococcus faecium|Enterococcus faecium 511	0	0	0	0	0	0	0	0	0	0	0	0	0	0	0	0	0	0	0	0	0	0
Bacteria|Firmicutes|Bacilli|Lactobacillales|Enterococcaceae|Enterococcus|Enterococcus faecium|Enterococcus faecium 513	0	0	0	0	0	0	0	0	0	0	0	0	0	0	0	0	0	0	0	0	0	0
Bacteria|Firmicutes|Bacilli|Lactobacillales|Enterococcaceae|Enterococcus|Enterococcus faecium|Enterococcus faecium 514	0	0	0	0	0	0	0	0	0	0	0	0	0	0	0	0	0	0	0	0	0	0
Bacteria|Firmicutes|Bacilli|Lactobacillales|Enterococcaceae|Enterococcus|Enterococcus faecium|Enterococcus faecium 515	0	0	0	0	0	0	0	0	0	0	0	0	0	0	0	0	0	0	0	0	0	0
Bacteria|Firmicutes|Bacilli|Lactobacillales|Enterococcaceae|Enterococcus|Enterococcus faecium|Enterococcus faecium Aus0004	0	1	0	0	0	0	0	0	0	0	0	0	0	0	0	0	0	0	0	0	0	0
Bacteria|Firmicutes|Bacilli|Lactobacillales|Enterococcaceae|Enterococcus|Enterococcus faecium|Enterococcus faecium C1904	1	1	1	1	0	0	0	0	0	0	0	0	0	0	0	0	3	0	0	0	0	0
Bacteria|Firmicutes|Bacilli|Lactobacillales|Enterococcaceae|Enterococcus|Enterococcus faecium|Enterococcus faecium C497	0	0	0	0	0	0	0	0	0	0	0	0	0	0	0	0	0	0	0	0	0	0
Bacteria|Firmicutes|Bacilli|Lactobacillales|Enterococcaceae|Enterococcus|Enterococcus faecium|Enterococcus faecium C621	0	0	0	0	0	0	0	0	0	0	0	0	0	0	0	0	0	0	0	0	0	0
Bacteria|Firmicutes|Bacilli|Lactobacillales|Enterococcaceae|Enterococcus|Enterococcus faecium|Enterococcus faecium C68	0	0	0	1	0	0	0	0	0	0	0	0	0	0	0	0	0	0	0	0	0	0
Bacteria|Firmicutes|Bacilli|Lactobacillales|Enterococcaceae|Enterococcus|Enterococcus faecium|Enterococcus faecium Com12	16	4	16	7	5	0	0	1	0	0	0	0	0	1	0	0	6	1	0	0	0	0
Bacteria|Firmicutes|Bacilli|Lactobacillales|Enterococcaceae|Enterococcus|Enterococcus faecium|Enterococcus faecium Com15	12	1	2	1	1	0	0	1	0	0	0	0	0	0	0	0	2	0	0	0	0	0
Bacteria|Firmicutes|Bacilli|Lactobacillales|Enterococcaceae|Enterococcus|Enterococcus faecium|Enterococcus faecium D344SRF	0	0	0	0	0	0	0	0	0	0	0	0	0	0	0	0	0	0	0	0	0	0
Bacteria|Firmicutes|Bacilli|Lactobacillales|Enterococcaceae|Enterococcus|Enterococcus faecium|Enterococcus faecium DO	1	3	1	1	0	0	0	0	0	0	0	0	0	0	0	0	0	0	0	0	0	0
Bacteria|Firmicutes|Bacilli|Lactobacillales|Enterococcaceae|Enterococcus|Enterococcus faecium|Enterococcus faecium E1039	5	1	4	1	0	0	0	2	0	0	0	0	0	0	0	0	3	0	0	0	0	0
Bacteria|Firmicutes|Bacilli|Lactobacillales|Enterococcaceae|Enterococcus|Enterococcus faecium|Enterococcus faecium E1071	15	8	5	2	0	0	0	14	0	0	0	0	0	0	0	0	7	1	0	0	0	0
Bacteria|Firmicutes|Bacilli|Lactobacillales|Enterococcaceae|Enterococcus|Enterococcus faecium|Enterococcus faecium E1162	0	0	0	0	0	0	0	0	0	0	0	0	0	0	0	0	0	0	0	0	0	0
Bacteria|Firmicutes|Bacilli|Lactobacillales|Enterococcaceae|Enterococcus|Enterococcus faecium|Enterococcus faecium E1636	22	12	6	2	0	0	0	18	0	0	0	0	0	0	0	0	4	0	0	0	0	0
Bacteria|Firmicutes|Bacilli|Lactobacillales|Enterococcaceae|Enterococcus|Enterococcus faecium|Enterococcus faecium E1679	8	5	2	3	1	0	0	6	0	0	0	0	0	0	0	0	3	1	0	0	0	0
Bacteria|Firmicutes|Bacilli|Lactobacillales|Enterococcaceae|Enterococcus|Enterococcus faecium|Enterococcus faecium E417	0	0	0	0	0	0	0	0	0	0	0	0	0	0	0	0	0	0	0	0	0	0
Bacteria|Firmicutes|Bacilli|Lactobacillales|Enterococcaceae|Enterococcus|Enterococcus faecium|Enterococcus faecium E422	0	0	0	0	0	0	0	0	0	0	0	0	0	0	0	0	0	0	0	0	0	0
Bacteria|Firmicutes|Bacilli|Lactobacillales|Enterococcaceae|Enterococcus|Enterococcus faecium|Enterococcus faecium E980	78	46	24	12	4	0	0	22	0	0	0	0	0	0	0	0	41	0	0	0	0	0
Bacteria|Firmicutes|Bacilli|Lactobacillales|Enterococcaceae|Enterococcus|Enterococcus faecium|Enterococcus faecium ERV1	0	0	0	0	0	0	0	0	0	0	0	0	0	0	0	0	0	0	0	0	0	0
Bacteria|Firmicutes|Bacilli|Lactobacillales|Enterococcaceae|Enterococcus|Enterococcus faecium|Enterococcus faecium ERV102	0	0	0	0	0	0	0	0	0	0	0	0	0	0	0	0	0	0	0	0	0	0
Bacteria|Firmicutes|Bacilli|Lactobacillales|Enterococcaceae|Enterococcus|Enterococcus faecium|Enterococcus faecium ERV161	0	0	0	0	0	0	0	0	0	0	0	0	0	0	0	0	0	0	0	0	0	0
Bacteria|Firmicutes|Bacilli|Lactobacillales|Enterococcaceae|Enterococcus|Enterococcus faecium|Enterococcus faecium ERV165	0	0	0	0	0	0	0	0	0	0	0	0	0	0	0	0	0	0	0	0	0	0
Bacteria|Firmicutes|Bacilli|Lactobacillales|Enterococcaceae|Enterococcus|Enterococcus faecium|Enterococcus faecium ERV168	0	0	0	0	0	0	0	0	0	0	0	0	0	0	0	0	0	0	0	0	0	0
Bacteria|Firmicutes|Bacilli|Lactobacillales|Enterococcaceae|Enterococcus|Enterococcus faecium|Enterococcus faecium ERV26	1	0	0	0	0	0	0	2	0	0	0	0	0	0	0	0	0	0	0	0	0	0
Bacteria|Firmicutes|Bacilli|Lactobacillales|Enterococcaceae|Enterococcus|Enterococcus faecium|Enterococcus faecium ERV38	0	0	0	0	0	0	0	0	0	0	0	0	0	0	0	0	0	0	0	0	0	0
Bacteria|Firmicutes|Bacilli|Lactobacillales|Enterococcaceae|Enterococcus|Enterococcus faecium|Enterococcus faecium ERV69	0	0	0	2	0	0	0	11	0	0	0	0	0	0	0	0	0	0	0	0	0	0
Bacteria|Firmicutes|Bacilli|Lactobacillales|Enterococcaceae|Enterococcus|Enterococcus faecium|Enterococcus faecium ERV99	0	0	0	0	0	0	0	3	0	0	0	0	0	0	0	0	1	0	0	0	0	0
Bacteria|Firmicutes|Bacilli|Lactobacillales|Enterococcaceae|Enterococcus|Enterococcus faecium|Enterococcus faecium LCT-EF128	1	2	3	1	0	0	0	0	0	1	0	0	0	2	0	0	2	0	0	0	0	0
Bacteria|Firmicutes|Bacilli|Lactobacillales|Enterococcaceae|Enterococcus|Enterococcus faecium|Enterococcus faecium P1123	0	0	0	0	0	0	0	0	0	0	0	0	0	0	0	0	0	0	0	0	0	0
Bacteria|Firmicutes|Bacilli|Lactobacillales|Enterococcaceae|Enterococcus|Enterococcus faecium|Enterococcus faecium P1137	0	0	0	0	0	0	0	0	0	0	0	0	0	0	0	0	0	0	0	0	0	0
Bacteria|Firmicutes|Bacilli|Lactobacillales|Enterococcaceae|Enterococcus|Enterococcus faecium|Enterococcus faecium P1139	0	0	0	0	0	0	0	0	0	0	0	0	0	0	0	0	0	0	0	0	0	0
Bacteria|Firmicutes|Bacilli|Lactobacillales|Enterococcaceae|Enterococcus|Enterococcus faecium|Enterococcus faecium P1140	0	0	0	0	0	0	0	0	0	0	0	0	0	0	0	0	0	0	0	0	0	0
Bacteria|Firmicutes|Bacilli|Lactobacillales|Enterococcaceae|Enterococcus|Enterococcus faecium|Enterococcus faecium P1190	1	0	0	0	0	0	0	0	0	0	0	0	0	0	0	0	0	0	0	0	0	0
Bacteria|Firmicutes|Bacilli|Lactobacillales|Enterococcaceae|Enterococcus|Enterococcus faecium|Enterococcus faecium P1986	2	3	0	1	0	0	0	0	0	0	0	0	0	0	0	0	0	0	0	0	0	0
Bacteria|Firmicutes|Bacilli|Lactobacillales|Enterococcaceae|Enterococcus|Enterococcus faecium|Enterococcus faecium PC4.1	55	25	25	19	17	1	0	73	0	0	2	1	0	2	0	0	27	0	0	0	1	0
Bacteria|Firmicutes|Bacilli|Lactobacillales|Enterococcaceae|Enterococcus|Enterococcus faecium|Enterococcus faecium R446	0	0	0	0	0	0	0	0	0	0	0	0	0	0	0	0	0	0	0	0	0	0
Bacteria|Firmicutes|Bacilli|Lactobacillales|Enterococcaceae|Enterococcus|Enterococcus faecium|Enterococcus faecium R494	0	0	0	0	0	0	0	0	0	0	0	0	0	0	0	0	0	0	0	0	0	0
Bacteria|Firmicutes|Bacilli|Lactobacillales|Enterococcaceae|Enterococcus|Enterococcus faecium|Enterococcus faecium R496	0	0	0	0	0	0	0	0	0	0	0	0	0	0	0	0	0	0	0	0	0	0
Bacteria|Firmicutes|Bacilli|Lactobacillales|Enterococcaceae|Enterococcus|Enterococcus faecium|Enterococcus faecium R497	0	0	0	0	0	0	0	2	0	0	0	0	0	0	0	0	0	0	0	0	0	0
Bacteria|Firmicutes|Bacilli|Lactobacillales|Enterococcaceae|Enterococcus|Enterococcus faecium|Enterococcus faecium R499	0	0	0	0	0	0	0	0	0	0	0	0	0	0	0	0	0	0	0	0	0	0
Bacteria|Firmicutes|Bacilli|Lactobacillales|Enterococcaceae|Enterococcus|Enterococcus faecium|Enterococcus faecium R501	0	0	0	0	0	0	0	0	0	0	0	0	0	0	0	0	0	0	0	0	0	0
Bacteria|Firmicutes|Bacilli|Lactobacillales|Enterococcaceae|Enterococcus|Enterococcus faecium|Enterococcus faecium S447	0	0	0	0	0	0	0	0	0	0	0	0	0	0	0	0	0	0	0	0	0	0
Bacteria|Firmicutes|Bacilli|Lactobacillales|Enterococcaceae|Enterococcus|Enterococcus faecium|Enterococcus faecium TC 6	0	0	0	0	0	0	0	0	0	0	0	0	0	0	0	0	0	0	0	0	0	0
Bacteria|Firmicutes|Bacilli|Lactobacillales|Enterococcaceae|Enterococcus|Enterococcus faecium|Enterococcus faecium TX0082	0	0	0	0	0	0	0	0	0	0	0	0	0	0	0	0	0	0	0	0	0	0
Bacteria|Firmicutes|Bacilli|Lactobacillales|Enterococcaceae|Enterococcus|Enterococcus faecium|Enterococcus faecium TX0133A	0	0	0	0	0	0	0	0	0	0	0	0	0	0	0	0	0	0	0	0	0	0
Bacteria|Firmicutes|Bacilli|Lactobacillales|Enterococcaceae|Enterococcus|Enterococcus faecium|Enterococcus faecium TX0133a01	0	0	0	0	0	0	0	0	0	0	0	0	0	0	0	0	0	0	0	0	0	0
Bacteria|Firmicutes|Bacilli|Lactobacillales|Enterococcaceae|Enterococcus|Enterococcus faecium|Enterococcus faecium TX0133a04	0	0	0	0	0	0	0	0	0	0	0	0	0	0	0	0	0	0	0	0	0	0
Bacteria|Firmicutes|Bacilli|Lactobacillales|Enterococcaceae|Enterococcus|Enterococcus faecium|Enterococcus faecium TX0133B	0	0	0	0	0	0	0	0	0	0	0	0	0	0	0	0	0	0	0	0	0	0
Bacteria|Firmicutes|Bacilli|Lactobacillales|Enterococcaceae|Enterococcus|Enterococcus faecium|Enterococcus faecium TX0133C	0	0	0	0	0	0	0	0	0	0	0	0	0	0	0	0	0	0	0	0	0	0
Bacteria|Firmicutes|Bacilli|Lactobacillales|Enterococcaceae|Enterococcus|Enterococcus faecium|Enterococcus faecium TX1330	36	8	9	17	6	0	0	31	0	0	0	0	0	0	0	0	16	0	1	0	0	0
Bacteria|Firmicutes|Bacilli|Lactobacillales|Enterococcaceae|Enterococcus|Enterococcus faecium|Enterococcus faecium TX1337RF	0	0	0	0	0	0	0	0	0	0	0	0	0	0	0	0	0	0	0	0	0	0
Bacteria|Firmicutes|Bacilli|Lactobacillales|Enterococcaceae|Enterococcus|Enterococcus faecium|Enterococcus faecium U0317	3	6	2	1	0	0	0	1	0	0	0	0	0	0	0	0	3	0	0	0	0	0
Bacteria|Firmicutes|Bacilli|Lactobacillales|Enterococcaceae|Enterococcus|Enterococcus faecium|Enterococcus faecium V689	0	0	0	0	0	0	0	0	0	0	0	0	0	0	0	0	0	0	0	0	0	0
Bacteria|Firmicutes|Bacilli|Lactobacillales|Enterococcaceae|Enterococcus|Enterococcus gallinarum|Enterococcus gallinarum EG2	0	0	0	0	1	0	0	0	0	0	0	0	0	0	0	0	0	0	0	0	0	0
Bacteria|Firmicutes|Bacilli|Lactobacillales|Enterococcaceae|Enterococcus|Enterococcus hirae|Enterococcus hirae ATCC 9790	122	45	63	22	17	1	1	211	0	0	0	0	1	1	0	0	48	1	3	0	0	1
Bacteria|Firmicutes|Bacilli|Lactobacillales|Enterococcaceae|Enterococcus|Enterococcus italicus|Enterococcus italicus DSM 15952	226	108	111	80	131	0	0	26	0	0	6	0	0	18	0	0	59	9	0	0	0	2
Bacteria|Firmicutes|Bacilli|Lactobacillales|Enterococcaceae|Enterococcus|Enterococcus saccharolyticus|Enterococcus saccharolyticus 30_1	0	4	0	0	1	0	0	1	0	0	0	0	0	0	0	0	0	0	0	0	0	0
Bacteria|Firmicutes|Bacilli|Lactobacillales|Enterococcaceae|Enterococcus|Enterococcus sp. 7L76	86	56	8	1	3	0	0	2	0	0	1	0	0	0	0	0	10	0	0	0	0	0
Bacteria|Firmicutes|Bacilli|Lactobacillales|Enterococcaceae|Melissococcus|Melissococcus plutonius|Melissococcus plutonius ATCC 35311	0	0	0	0	0	0	0	0	0	0	0	0	0	0	0	0	0	0	0	0	0	0
Bacteria|Firmicutes|Bacilli|Lactobacillales|Enterococcaceae|Melissococcus|Melissococcus plutonius|Melissococcus plutonius DAT561	0	0	0	0	0	0	0	0	0	0	0	0	0	0	0	0	0	0	0	0	0	0
Bacteria|Firmicutes|Bacilli|Lactobacillales|Enterococcaceae|Tetragenococcus|Tetragenococcus halophilus|Tetragenococcus halophilus NBRC 12172	3	0	1	0	0	0	0	0	0	0	0	0	0	0	0	0	1	0	0	0	0	0
Bacteria|Firmicutes|Bacilli|Lactobacillales|Lactobacillaceae|Lactobacillus|Lactobacillus acidipiscis|Lactobacillus acidipiscis KCTC 13900	0	2	1	0	3	0	0	1	0	0	0	0	0	0	0	0	1	1	0	0	0	0
Bacteria|Firmicutes|Bacilli|Lactobacillales|Lactobacillaceae|Lactobacillus|Lactobacillus acidophilus|Lactobacillus acidophilus 30SC	1	0	0	0	0	0	0	0	0	0	0	0	0	0	0	0	0	0	0	0	0	0
Bacteria|Firmicutes|Bacilli|Lactobacillales|Lactobacillaceae|Lactobacillus|Lactobacillus acidophilus|Lactobacillus acidophilus ATCC 4796	1	0	0	0	0	0	0	3	0	0	0	0	0	0	0	0	3	0	0	0	0	0
Bacteria|Firmicutes|Bacilli|Lactobacillales|Lactobacillaceae|Lactobacillus|Lactobacillus acidophilus|Lactobacillus acidophilus NCFM	1	0	0	0	0	0	0	2	0	0	0	0	0	0	0	0	0	0	0	0	0	0
Bacteria|Firmicutes|Bacilli|Lactobacillales|Lactobacillaceae|Lactobacillus|Lactobacillus amylolyticus|Lactobacillus amylolyticus DSM 11664	0	0	0	0	0	0	0	0	0	0	0	0	0	0	0	0	0	0	0	0	0	0
Bacteria|Firmicutes|Bacilli|Lactobacillales|Lactobacillaceae|Lactobacillus|Lactobacillus amylovorus|Lactobacillus amylovorus GRL 1112	0	0	0	0	0	0	0	1	0	0	0	0	0	0	0	0	0	0	0	0	0	0
Bacteria|Firmicutes|Bacilli|Lactobacillales|Lactobacillaceae|Lactobacillus|Lactobacillus amylovorus|Lactobacillus amylovorus GRL1118	1	0	0	0	0	0	0	0	0	0	0	0	0	0	0	0	0	0	0	0	0	0
Bacteria|Firmicutes|Bacilli|Lactobacillales|Lactobacillaceae|Lactobacillus|Lactobacillus animalis|Lactobacillus animalis KCTC 3501 = DSM 20602	0	0	0	0	0	0	0	0	0	0	0	0	0	0	0	0	0	0	0	0	0	0
Bacteria|Firmicutes|Bacilli|Lactobacillales|Lactobacillaceae|Lactobacillus|Lactobacillus antri|Lactobacillus antri DSM 16041	0	0	0	0	0	0	0	0	0	0	0	0	0	0	0	0	0	0	0	0	0	0
Bacteria|Firmicutes|Bacilli|Lactobacillales|Lactobacillaceae|Lactobacillus|Lactobacillus brevis|Lactobacillus brevis ATCC 367	44	30	15	30	30	0	0	9	0	0	4	2	0	11	0	0	12	6	1	0	0	0
Bacteria|Firmicutes|Bacilli|Lactobacillales|Lactobacillaceae|Lactobacillus|Lactobacillus brevis|Lactobacillus brevis subsp. gravesensis|Lactobacillus brevis subsp. gravesensis ATCC 27305	0	0	3	1	0	0	0	0	0	0	0	0	0	0	0	0	0	0	0	0	0	0
Bacteria|Firmicutes|Bacilli|Lactobacillales|Lactobacillaceae|Lactobacillus|Lactobacillus buchneri|Lactobacillus buchneri ATCC 11577	0	0	0	0	0	0	0	0	0	0	0	0	0	0	0	0	0	0	0	0	0	0
Bacteria|Firmicutes|Bacilli|Lactobacillales|Lactobacillaceae|Lactobacillus|Lactobacillus buchneri|Lactobacillus buchneri NRRL B-30929	2	0	2	1	0	0	0	0	0	0	0	1	0	0	0	0	1	0	0	0	0	0
Bacteria|Firmicutes|Bacilli|Lactobacillales|Lactobacillaceae|Lactobacillus|Lactobacillus casei group|Lactobacillus casei|Lactobacillus casei ATCC 334	0	0	0	0	0	0	0	0	0	0	0	0	0	1	0	0	0	0	0	0	0	0
Bacteria|Firmicutes|Bacilli|Lactobacillales|Lactobacillaceae|Lactobacillus|Lactobacillus casei group|Lactobacillus casei|Lactobacillus casei BD-II	2	0	1	0	0	0	0	0	0	0	0	0	0	0	0	0	0	0	0	0	0	0
Bacteria|Firmicutes|Bacilli|Lactobacillales|Lactobacillaceae|Lactobacillus|Lactobacillus casei group|Lactobacillus casei|Lactobacillus casei BL23	0	0	0	0	0	0	0	0	0	0	0	0	0	0	0	0	0	0	0	0	0	0
Bacteria|Firmicutes|Bacilli|Lactobacillales|Lactobacillaceae|Lactobacillus|Lactobacillus casei group|Lactobacillus casei|Lactobacillus casei LC2W	0	0	0	0	0	0	0	0	0	0	0	0	0	0	0	0	0	0	0	0	0	0
Bacteria|Firmicutes|Bacilli|Lactobacillales|Lactobacillaceae|Lactobacillus|Lactobacillus casei group|Lactobacillus casei|Lactobacillus casei str. Zhang	0	0	0	0	0	0	0	0	0	0	0	0	0	0	0	0	0	0	0	0	0	0
Bacteria|Firmicutes|Bacilli|Lactobacillales|Lactobacillaceae|Lactobacillus|Lactobacillus casei group|Lactobacillus paracasei|Lactobacillus paracasei subsp. paracasei|Lactobacillus paracasei subsp. paracasei 8700	0	0	0	0	0	0	0	0	0	0	0	0	0	0	0	0	0	0	0	0	0	0
Bacteria|Firmicutes|Bacilli|Lactobacillales|Lactobacillaceae|Lactobacillus|Lactobacillus casei group|Lactobacillus paracasei|Lactobacillus paracasei subsp. paracasei|Lactobacillus paracasei subsp. paracasei ATCC 25302	3	2	0	2	6	1	0	3	0	0	2	0	0	2	0	0	3	0	0	0	0	0
Bacteria|Firmicutes|Bacilli|Lactobacillales|Lactobacillaceae|Lactobacillus|Lactobacillus casei group|Lactobacillus zeae|Lactobacillus zeae KCTC 3804	0	0	0	0	1	0	0	0	0	0	0	0	0	0	0	0	0	0	0	0	0	0
Bacteria|Firmicutes|Bacilli|Lactobacillales|Lactobacillaceae|Lactobacillus|Lactobacillus coleohominis|Lactobacillus coleohominis 101-4-CHN	0	0	0	0	0	0	0	0	0	0	0	0	0	0	0	0	0	0	0	0	0	0
Bacteria|Firmicutes|Bacilli|Lactobacillales|Lactobacillaceae|Lactobacillus|Lactobacillus coryniformis|Lactobacillus coryniformis subsp. coryniformis|Lactobacillus coryniformis subsp. coryniformis KCTC 3167 = DSM 20001	0	0	0	0	0	0	0	0	0	0	0	0	0	0	0	0	0	0	0	0	0	0
Bacteria|Firmicutes|Bacilli|Lactobacillales|Lactobacillaceae|Lactobacillus|Lactobacillus coryniformis|Lactobacillus coryniformis subsp. torquens|Lactobacillus coryniformis subsp. torquens KCTC 3535	5	6	1	1	1	0	0	0	0	0	0	0	0	0	0	0	1	0	0	0	0	0
Bacteria|Firmicutes|Bacilli|Lactobacillales|Lactobacillaceae|Lactobacillus|Lactobacillus crispatus|Lactobacillus crispatus 125-2-CHN	3	1	0	3	0	0	0	1	0	0	0	0	0	0	0	0	2	0	0	0	0	0
Bacteria|Firmicutes|Bacilli|Lactobacillales|Lactobacillaceae|Lactobacillus|Lactobacillus crispatus|Lactobacillus crispatus 214-1	0	0	0	0	0	0	0	0	0	0	0	0	0	1	0	0	0	0	0	0	0	0
Bacteria|Firmicutes|Bacilli|Lactobacillales|Lactobacillaceae|Lactobacillus|Lactobacillus crispatus|Lactobacillus crispatus CTV-05	1	2	2	0	0	0	0	0	0	0	0	0	0	0	0	0	0	0	0	0	0	0
Bacteria|Firmicutes|Bacilli|Lactobacillales|Lactobacillaceae|Lactobacillus|Lactobacillus crispatus|Lactobacillus crispatus JV-V01	0	0	0	0	0	0	0	0	0	0	0	0	0	0	0	0	0	0	0	0	0	0
Bacteria|Firmicutes|Bacilli|Lactobacillales|Lactobacillaceae|Lactobacillus|Lactobacillus crispatus|Lactobacillus crispatus MV-1A-US	0	0	0	0	0	0	0	0	0	0	0	0	0	0	0	0	2	0	0	0	0	0
Bacteria|Firmicutes|Bacilli|Lactobacillales|Lactobacillaceae|Lactobacillus|Lactobacillus crispatus|Lactobacillus crispatus MV-3A-US	5	0	0	0	0	0	0	0	0	0	0	0	0	0	0	0	0	0	0	0	0	0
Bacteria|Firmicutes|Bacilli|Lactobacillales|Lactobacillaceae|Lactobacillus|Lactobacillus crispatus|Lactobacillus crispatus SJ-3C-US	2	0	0	0	0	0	0	0	0	0	0	0	0	0	0	0	0	0	0	0	0	0
Bacteria|Firmicutes|Bacilli|Lactobacillales|Lactobacillaceae|Lactobacillus|Lactobacillus crispatus|Lactobacillus crispatus ST1	0	0	0	2	1	0	0	2	0	0	0	0	0	0	0	0	0	0	0	0	0	0
Bacteria|Firmicutes|Bacilli|Lactobacillales|Lactobacillaceae|Lactobacillus|Lactobacillus curvatus|Lactobacillus curvatus CRL 705	5	4	7	3	1	0	0	0	0	0	2	0	0	0	0	0	1	1	0	0	0	0
Bacteria|Firmicutes|Bacilli|Lactobacillales|Lactobacillaceae|Lactobacillus|Lactobacillus delbrueckii|Lactobacillus delbrueckii subsp. bulgaricus|Lactobacillus delbrueckii subsp. bulgaricus 2038	8	3	1	2	2	0	0	2	0	0	0	0	0	0	0	0	2	0	0	1	0	0
Bacteria|Firmicutes|Bacilli|Lactobacillales|Lactobacillaceae|Lactobacillus|Lactobacillus delbrueckii|Lactobacillus delbrueckii subsp. bulgaricus|Lactobacillus delbrueckii subsp. bulgaricus ATCC 11842	6	0	0	0	1	0	0	2	0	0	0	0	0	0	0	0	1	0	0	0	0	0
Bacteria|Firmicutes|Bacilli|Lactobacillales|Lactobacillaceae|Lactobacillus|Lactobacillus delbrueckii|Lactobacillus delbrueckii subsp. bulgaricus|Lactobacillus delbrueckii subsp. bulgaricus ATCC BAA-365	7	2	2	1	0	0	0	3	0	0	0	0	0	0	0	0	1	0	0	0	0	0
Bacteria|Firmicutes|Bacilli|Lactobacillales|Lactobacillaceae|Lactobacillus|Lactobacillus delbrueckii|Lactobacillus delbrueckii subsp. bulgaricus|Lactobacillus delbrueckii subsp. bulgaricus ND02	0	0	1	0	0	0	0	1	0	0	0	0	0	0	0	0	0	0	0	0	0	0
Bacteria|Firmicutes|Bacilli|Lactobacillales|Lactobacillaceae|Lactobacillus|Lactobacillus delbrueckii|Lactobacillus delbrueckii subsp. bulgaricus|Lactobacillus delbrueckii subsp. bulgaricus PB2003/044-T3-4	2	3	2	0	1	0	0	1	0	0	0	0	0	0	0	0	0	0	0	0	0	0
Bacteria|Firmicutes|Bacilli|Lactobacillales|Lactobacillaceae|Lactobacillus|Lactobacillus delbrueckii|Lactobacillus delbrueckii subsp. lactis|Lactobacillus delbrueckii subsp. lactis DSM 20072	0	0	0	0	0	0	0	1	0	0	0	0	0	1	0	0	0	0	0	0	0	0
Bacteria|Firmicutes|Bacilli|Lactobacillales|Lactobacillaceae|Lactobacillus|Lactobacillus farciminis|Lactobacillus farciminis KCTC 3681 = DSM 20184	0	0	0	0	0	0	0	0	0	0	0	0	0	0	0	0	0	0	0	0	0	0
Bacteria|Firmicutes|Bacilli|Lactobacillales|Lactobacillaceae|Lactobacillus|Lactobacillus fermentum|Lactobacillus fermentum 28-3-CHN	2	0	1	2	0	0	0	3	0	0	1	0	0	1	0	0	2	0	0	0	0	0
Bacteria|Firmicutes|Bacilli|Lactobacillales|Lactobacillaceae|Lactobacillus|Lactobacillus fermentum|Lactobacillus fermentum ATCC 14931	18	4	5	2	12	0	0	69	0	1	2	0	1	1	0	0	13	0	0	0	0	0
Bacteria|Firmicutes|Bacilli|Lactobacillales|Lactobacillaceae|Lactobacillus|Lactobacillus fermentum|Lactobacillus fermentum CECT 5716	1	0	0	0	0	0	0	5	0	0	1	0	2	0	0	0	0	0	0	0	0	0
Bacteria|Firmicutes|Bacilli|Lactobacillales|Lactobacillaceae|Lactobacillus|Lactobacillus fermentum|Lactobacillus fermentum IFO 3956	0	1	0	0	0	0	0	2	0	0	0	0	0	0	0	0	0	0	0	0	0	0
Bacteria|Firmicutes|Bacilli|Lactobacillales|Lactobacillaceae|Lactobacillus|Lactobacillus fructivorans|Lactobacillus fructivorans KCTC 3543 = DSM 20203	0	0	0	0	0	0	0	0	0	0	0	0	0	0	0	0	0	0	0	0	0	0
Bacteria|Firmicutes|Bacilli|Lactobacillales|Lactobacillaceae|Lactobacillus|Lactobacillus gasseri|Lactobacillus gasseri 202-4	0	0	0	0	0	0	0	0	0	0	0	0	0	0	0	0	0	0	0	0	0	0
Bacteria|Firmicutes|Bacilli|Lactobacillales|Lactobacillaceae|Lactobacillus|Lactobacillus gasseri|Lactobacillus gasseri 224-1	0	0	0	0	0	0	0	0	0	0	0	0	0	0	0	0	0	0	0	0	0	0
Bacteria|Firmicutes|Bacilli|Lactobacillales|Lactobacillaceae|Lactobacillus|Lactobacillus gasseri|Lactobacillus gasseri ATCC 33323	0	0	0	0	0	0	0	0	0	0	0	0	0	0	0	0	0	0	0	0	0	0
Bacteria|Firmicutes|Bacilli|Lactobacillales|Lactobacillaceae|Lactobacillus|Lactobacillus gasseri|Lactobacillus gasseri CECT 5714	0	0	0	0	0	0	0	0	0	0	0	0	0	0	0	0	0	0	0	0	0	0
Bacteria|Firmicutes|Bacilli|Lactobacillales|Lactobacillaceae|Lactobacillus|Lactobacillus gasseri|Lactobacillus gasseri JV-V03	0	0	0	0	0	0	0	0	0	0	0	0	0	0	0	0	0	0	0	0	0	0
Bacteria|Firmicutes|Bacilli|Lactobacillales|Lactobacillaceae|Lactobacillus|Lactobacillus gasseri|Lactobacillus gasseri MV-22	0	0	0	0	0	0	0	0	0	0	0	0	0	0	0	0	0	0	0	0	0	0
Bacteria|Firmicutes|Bacilli|Lactobacillales|Lactobacillaceae|Lactobacillus|Lactobacillus gasseri|Lactobacillus gasseri SJ-9E-US	0	0	0	0	0	0	0	0	0	0	0	0	0	0	0	0	0	0	0	0	0	0
Bacteria|Firmicutes|Bacilli|Lactobacillales|Lactobacillaceae|Lactobacillus|Lactobacillus gasseri|Lactobacillus gasseri SV-16A-US	0	0	0	0	0	0	0	0	0	0	0	0	0	0	0	0	0	0	0	0	0	0
Bacteria|Firmicutes|Bacilli|Lactobacillales|Lactobacillaceae|Lactobacillus|Lactobacillus gastricus|Lactobacillus gastricus PS3	0	0	1	0	0	0	0	0	0	0	0	0	0	0	0	0	0	0	0	0	0	0
Bacteria|Firmicutes|Bacilli|Lactobacillales|Lactobacillaceae|Lactobacillus|Lactobacillus helveticus|Lactobacillus helveticus DPC 4571	3	0	2	1	1	0	0	5	0	0	0	0	0	0	0	0	0	0	0	0	0	0
Bacteria|Firmicutes|Bacilli|Lactobacillales|Lactobacillaceae|Lactobacillus|Lactobacillus helveticus|Lactobacillus helveticus DSM 20075	4	2	0	1	8	0	0	3	0	0	0	0	0	1	0	0	1	0	0	0	0	0
Bacteria|Firmicutes|Bacilli|Lactobacillales|Lactobacillaceae|Lactobacillus|Lactobacillus helveticus|Lactobacillus helveticus H10	3	3	0	0	2	0	0	4	0	0	0	0	0	0	0	0	2	0	0	0	0	0
Bacteria|Firmicutes|Bacilli|Lactobacillales|Lactobacillaceae|Lactobacillus|Lactobacillus helveticus|Lactobacillus helveticus R0052	24	9	3	3	1	0	0	10	0	0	0	0	0	0	0	0	9	1	2	0	0	0
Bacteria|Firmicutes|Bacilli|Lactobacillales|Lactobacillaceae|Lactobacillus|Lactobacillus hilgardii|Lactobacillus hilgardii ATCC 8290	0	0	0	0	0	0	0	0	0	0	0	0	0	0	0	0	0	0	0	0	0	0
Bacteria|Firmicutes|Bacilli|Lactobacillales|Lactobacillaceae|Lactobacillus|Lactobacillus iners|Lactobacillus iners AB-1	0	0	0	0	0	0	0	0	0	0	0	0	0	0	0	0	0	0	0	0	0	0
Bacteria|Firmicutes|Bacilli|Lactobacillales|Lactobacillaceae|Lactobacillus|Lactobacillus iners|Lactobacillus iners ATCC 55195	0	0	0	0	0	0	0	0	0	0	0	0	0	0	0	0	0	0	0	0	0	0
Bacteria|Firmicutes|Bacilli|Lactobacillales|Lactobacillaceae|Lactobacillus|Lactobacillus iners|Lactobacillus iners DSM 13335	0	0	0	0	0	0	0	0	0	0	0	0	0	0	0	0	0	0	0	0	0	0
Bacteria|Firmicutes|Bacilli|Lactobacillales|Lactobacillaceae|Lactobacillus|Lactobacillus iners|Lactobacillus iners LactinV 01V1-a	0	0	0	0	0	0	0	0	0	0	0	0	0	0	0	0	0	0	0	0	0	0
Bacteria|Firmicutes|Bacilli|Lactobacillales|Lactobacillaceae|Lactobacillus|Lactobacillus iners|Lactobacillus iners LactinV 03V1-b	0	0	0	0	0	0	0	0	0	0	0	0	0	0	0	0	0	0	0	0	0	0
Bacteria|Firmicutes|Bacilli|Lactobacillales|Lactobacillaceae|Lactobacillus|Lactobacillus iners|Lactobacillus iners LactinV 09V1-c	0	0	0	0	0	0	0	0	0	0	0	0	0	0	0	0	0	0	0	0	0	0
Bacteria|Firmicutes|Bacilli|Lactobacillales|Lactobacillaceae|Lactobacillus|Lactobacillus iners|Lactobacillus iners LactinV 11V1-d	0	0	0	0	0	0	0	1	0	0	0	0	0	0	0	0	0	0	0	0	0	0
Bacteria|Firmicutes|Bacilli|Lactobacillales|Lactobacillaceae|Lactobacillus|Lactobacillus iners|Lactobacillus iners LEAF 2052A-d	0	0	0	0	0	0	0	0	0	0	0	0	0	0	0	0	0	0	0	0	0	0
Bacteria|Firmicutes|Bacilli|Lactobacillales|Lactobacillaceae|Lactobacillus|Lactobacillus iners|Lactobacillus iners LEAF 2053A-b	0	0	0	0	0	0	0	0	0	0	0	0	0	0	0	0	0	0	0	0	0	0
Bacteria|Firmicutes|Bacilli|Lactobacillales|Lactobacillaceae|Lactobacillus|Lactobacillus iners|Lactobacillus iners LEAF 2062A-h1	0	0	0	1	0	0	0	1	0	0	0	0	0	0	0	0	0	0	0	0	0	0
Bacteria|Firmicutes|Bacilli|Lactobacillales|Lactobacillaceae|Lactobacillus|Lactobacillus iners|Lactobacillus iners LEAF 3008A-a	1	0	0	0	0	0	0	2	0	0	0	0	0	0	0	0	0	0	0	0	0	0
Bacteria|Firmicutes|Bacilli|Lactobacillales|Lactobacillaceae|Lactobacillus|Lactobacillus iners|Lactobacillus iners SPIN 1401G	0	0	0	0	0	0	0	0	0	0	0	0	0	0	0	0	0	0	0	0	0	0
Bacteria|Firmicutes|Bacilli|Lactobacillales|Lactobacillaceae|Lactobacillus|Lactobacillus iners|Lactobacillus iners SPIN 2503V10-D	0	0	0	0	0	0	0	0	0	0	0	0	0	0	0	0	0	0	0	0	0	0
Bacteria|Firmicutes|Bacilli|Lactobacillales|Lactobacillaceae|Lactobacillus|Lactobacillus iners|Lactobacillus iners UPII 143-D	0	0	0	0	0	0	0	0	0	0	0	0	0	0	0	0	0	0	0	0	0	0
Bacteria|Firmicutes|Bacilli|Lactobacillales|Lactobacillaceae|Lactobacillus|Lactobacillus iners|Lactobacillus iners UPII 60-B	0	0	0	0	0	0	0	0	0	0	0	0	0	0	0	0	0	0	0	0	0	0
Bacteria|Firmicutes|Bacilli|Lactobacillales|Lactobacillaceae|Lactobacillus|Lactobacillus jensenii|Lactobacillus jensenii 1153	0	0	0	0	0	0	0	0	0	0	0	0	0	0	0	0	0	0	0	0	0	0
Bacteria|Firmicutes|Bacilli|Lactobacillales|Lactobacillaceae|Lactobacillus|Lactobacillus jensenii|Lactobacillus jensenii 115-3-CHN	0	0	0	0	0	0	0	0	0	0	0	0	0	0	0	0	0	0	0	0	0	0
Bacteria|Firmicutes|Bacilli|Lactobacillales|Lactobacillaceae|Lactobacillus|Lactobacillus jensenii|Lactobacillus jensenii 208-1	0	0	0	0	0	0	0	0	0	0	0	0	0	0	0	0	0	0	0	0	0	0
Bacteria|Firmicutes|Bacilli|Lactobacillales|Lactobacillaceae|Lactobacillus|Lactobacillus jensenii|Lactobacillus jensenii 269-3	0	0	0	0	0	0	0	0	0	0	0	0	0	0	0	0	0	0	0	0	0	0
Bacteria|Firmicutes|Bacilli|Lactobacillales|Lactobacillaceae|Lactobacillus|Lactobacillus jensenii|Lactobacillus jensenii 27-2-CHN	0	0	0	0	0	0	0	0	0	0	0	0	0	0	0	0	0	0	0	0	0	0
Bacteria|Firmicutes|Bacilli|Lactobacillales|Lactobacillaceae|Lactobacillus|Lactobacillus jensenii|Lactobacillus jensenii JV-V16	0	0	0	0	0	0	0	0	0	0	0	0	0	0	0	0	0	0	0	0	0	0
Bacteria|Firmicutes|Bacilli|Lactobacillales|Lactobacillaceae|Lactobacillus|Lactobacillus jensenii|Lactobacillus jensenii SJ-7A-US	0	0	0	0	0	0	0	0	0	0	0	0	0	0	0	0	0	0	0	0	0	0
Bacteria|Firmicutes|Bacilli|Lactobacillales|Lactobacillaceae|Lactobacillus|Lactobacillus johnsonii|Lactobacillus johnsonii ATCC 33200	0	1	0	0	0	0	0	0	0	0	0	0	0	0	0	0	0	0	0	0	0	0
Bacteria|Firmicutes|Bacilli|Lactobacillales|Lactobacillaceae|Lactobacillus|Lactobacillus johnsonii|Lactobacillus johnsonii DPC 6026	1	0	1	0	0	0	0	4	0	0	0	2	0	0	0	0	1	0	0	0	0	0
Bacteria|Firmicutes|Bacilli|Lactobacillales|Lactobacillaceae|Lactobacillus|Lactobacillus johnsonii|Lactobacillus johnsonii FI9785	0	0	0	0	0	0	0	0	0	0	0	0	0	0	0	0	0	0	0	0	0	0
Bacteria|Firmicutes|Bacilli|Lactobacillales|Lactobacillaceae|Lactobacillus|Lactobacillus johnsonii|Lactobacillus johnsonii NCC 533	0	0	0	0	0	0	0	0	0	0	0	0	0	0	0	0	0	0	0	0	0	0
Bacteria|Firmicutes|Bacilli|Lactobacillales|Lactobacillaceae|Lactobacillus|Lactobacillus kefiranofaciens|Lactobacillus kefiranofaciens ZW3	0	0	0	0	0	0	0	0	0	0	0	0	0	0	0	0	0	0	0	0	0	0
Bacteria|Firmicutes|Bacilli|Lactobacillales|Lactobacillaceae|Lactobacillus|Lactobacillus kisonensis|Lactobacillus kisonensis F0435	0	0	0	0	0	0	0	0	0	0	0	0	0	0	0	0	0	0	0	0	0	0
Bacteria|Firmicutes|Bacilli|Lactobacillales|Lactobacillaceae|Lactobacillus|Lactobacillus malefermentans|Lactobacillus malefermentans KCTC 3548	0	0	0	0	0	0	0	0	0	0	0	0	0	0	0	0	0	0	0	0	0	0
Bacteria|Firmicutes|Bacilli|Lactobacillales|Lactobacillaceae|Lactobacillus|Lactobacillus mali|Lactobacillus mali KCTC 3596 = DSM 20444	5	0	1	1	0	0	0	0	0	0	0	0	0	0	0	0	2	0	0	0	0	0
Bacteria|Firmicutes|Bacilli|Lactobacillales|Lactobacillaceae|Lactobacillus|Lactobacillus mucosae|Lactobacillus mucosae LM1	43	9	9	7	3	1	0	45	0	0	2	1	0	3	0	0	17	0	0	0	0	0
Bacteria|Firmicutes|Bacilli|Lactobacillales|Lactobacillaceae|Lactobacillus|Lactobacillus oris|Lactobacillus oris F0423	0	0	0	0	0	0	0	1	0	0	0	0	0	0	0	0	0	0	0	0	0	0
Bacteria|Firmicutes|Bacilli|Lactobacillales|Lactobacillaceae|Lactobacillus|Lactobacillus oris|Lactobacillus oris PB013-T2-3	0	1	0	0	0	0	0	0	0	0	0	0	0	0	0	0	0	0	0	0	0	0
Bacteria|Firmicutes|Bacilli|Lactobacillales|Lactobacillaceae|Lactobacillus|Lactobacillus parafarraginis|Lactobacillus parafarraginis F0439	0	0	0	0	0	0	0	0	0	0	0	0	0	0	0	0	0	0	0	0	0	0
Bacteria|Firmicutes|Bacilli|Lactobacillales|Lactobacillaceae|Lactobacillus|Lactobacillus plantarum|Lactobacillus plantarum JDM1	2	1	1	0	1	0	0	1	0	0	0	0	1	1	0	0	1	0	0	0	0	0
Bacteria|Firmicutes|Bacilli|Lactobacillales|Lactobacillaceae|Lactobacillus|Lactobacillus plantarum|Lactobacillus plantarum subsp. plantarum|Lactobacillus plantarum subsp. plantarum ATCC 14917	1	1	1	3	1	0	0	1	0	0	0	0	0	1	0	0	2	1	0	0	0	0
Bacteria|Firmicutes|Bacilli|Lactobacillales|Lactobacillaceae|Lactobacillus|Lactobacillus plantarum|Lactobacillus plantarum subsp. plantarum|Lactobacillus plantarum subsp. plantarum ST-III	2	1	1	1	3	0	0	1	0	0	0	0	0	1	0	0	1	0	0	0	0	0
Bacteria|Firmicutes|Bacilli|Lactobacillales|Lactobacillaceae|Lactobacillus|Lactobacillus plantarum|Lactobacillus plantarum WCFS1	2	0	2	0	0	0	0	0	0	0	0	0	0	1	0	0	0	1	0	0	0	0
Bacteria|Firmicutes|Bacilli|Lactobacillales|Lactobacillaceae|Lactobacillus|Lactobacillus reuteri|Lactobacillus reuteri 100-23	0	0	0	0	0	0	0	1	0	0	0	0	0	0	0	0	0	0	0	0	0	0
Bacteria|Firmicutes|Bacilli|Lactobacillales|Lactobacillaceae|Lactobacillus|Lactobacillus reuteri|Lactobacillus reuteri CF48-3A	0	0	0	0	0	0	0	0	0	0	0	0	0	0	0	0	0	0	0	0	0	0
Bacteria|Firmicutes|Bacilli|Lactobacillales|Lactobacillaceae|Lactobacillus|Lactobacillus reuteri|Lactobacillus reuteri DSM 20016	0	0	0	0	0	0	0	0	0	0	0	0	0	0	0	0	0	0	0	0	0	0
Bacteria|Firmicutes|Bacilli|Lactobacillales|Lactobacillaceae|Lactobacillus|Lactobacillus reuteri|Lactobacillus reuteri JCM 1112	0	0	0	0	0	0	0	0	0	0	0	0	0	0	0	0	0	0	0	0	0	0
Bacteria|Firmicutes|Bacilli|Lactobacillales|Lactobacillaceae|Lactobacillus|Lactobacillus reuteri|Lactobacillus reuteri MM2-3	0	0	0	0	0	0	0	0	0	0	0	0	0	0	0	0	0	0	0	0	0	0
Bacteria|Firmicutes|Bacilli|Lactobacillales|Lactobacillaceae|Lactobacillus|Lactobacillus reuteri|Lactobacillus reuteri MM4-1A	0	0	0	0	0	0	0	0	0	0	0	0	0	0	0	0	0	0	0	0	0	0
Bacteria|Firmicutes|Bacilli|Lactobacillales|Lactobacillaceae|Lactobacillus|Lactobacillus reuteri|Lactobacillus reuteri SD2112	1	0	0	0	0	0	0	0	0	0	0	0	0	0	0	0	0	0	0	0	0	0
Bacteria|Firmicutes|Bacilli|Lactobacillales|Lactobacillaceae|Lactobacillus|Lactobacillus rhamnosus|Lactobacillus rhamnosus ATCC 21052	0	0	0	0	0	0	0	0	0	0	0	0	0	0	0	0	0	0	0	0	0	0
Bacteria|Firmicutes|Bacilli|Lactobacillales|Lactobacillaceae|Lactobacillus|Lactobacillus rhamnosus|Lactobacillus rhamnosus ATCC 8530	0	0	0	0	0	0	0	0	0	0	0	0	0	0	0	0	0	0	0	0	0	0
Bacteria|Firmicutes|Bacilli|Lactobacillales|Lactobacillaceae|Lactobacillus|Lactobacillus rhamnosus|Lactobacillus rhamnosus GG	0	0	0	0	0	0	0	0	0	0	0	0	0	0	0	0	0	0	0	0	0	0
Bacteria|Firmicutes|Bacilli|Lactobacillales|Lactobacillaceae|Lactobacillus|Lactobacillus rhamnosus|Lactobacillus rhamnosus HN001	0	0	0	0	0	0	0	0	0	0	0	0	0	0	0	0	0	0	0	0	0	0
Bacteria|Firmicutes|Bacilli|Lactobacillales|Lactobacillaceae|Lactobacillus|Lactobacillus rhamnosus|Lactobacillus rhamnosus Lc 705	1	2	3	1	0	0	0	0	0	0	0	0	0	0	0	0	0	0	0	0	0	0
Bacteria|Firmicutes|Bacilli|Lactobacillales|Lactobacillaceae|Lactobacillus|Lactobacillus rhamnosus|Lactobacillus rhamnosus LMS2-1	0	0	0	0	0	0	0	0	0	0	0	0	0	0	0	0	0	0	0	0	0	0
Bacteria|Firmicutes|Bacilli|Lactobacillales|Lactobacillaceae|Lactobacillus|Lactobacillus rhamnosus|Lactobacillus rhamnosus R0011	0	0	0	0	0	0	0	0	0	0	0	0	0	0	0	0	0	0	0	0	0	0
Bacteria|Firmicutes|Bacilli|Lactobacillales|Lactobacillaceae|Lactobacillus|Lactobacillus ruminis|Lactobacillus ruminis ATCC 25644	11	5	2	2	1	0	0	11	0	0	0	0	0	0	0	1	8	0	0	0	0	0
Bacteria|Firmicutes|Bacilli|Lactobacillales|Lactobacillaceae|Lactobacillus|Lactobacillus ruminis|Lactobacillus ruminis ATCC 27782	9	3	3	0	3	0	0	5	0	0	0	0	0	0	0	0	3	0	0	0	0	0
Bacteria|Firmicutes|Bacilli|Lactobacillales|Lactobacillaceae|Lactobacillus|Lactobacillus ruminis|Lactobacillus ruminis SPM0211	15	4	5	2	2	0	0	11	0	0	0	0	0	0	0	0	5	0	0	0	0	0
Bacteria|Firmicutes|Bacilli|Lactobacillales|Lactobacillaceae|Lactobacillus|Lactobacillus sakei|Lactobacillus sakei subsp. sakei|Lactobacillus sakei subsp. sakei 23K	2	0	0	0	0	0	0	1	0	0	0	0	0	0	0	0	1	0	0	0	0	0
Bacteria|Firmicutes|Bacilli|Lactobacillales|Lactobacillaceae|Lactobacillus|Lactobacillus salivarius|Lactobacillus salivarius ACS-116-V-Col5a	44	17	8	4	1	0	0	13	0	0	0	0	0	1	0	0	6	0	0	0	0	0
Bacteria|Firmicutes|Bacilli|Lactobacillales|Lactobacillaceae|Lactobacillus|Lactobacillus salivarius|Lactobacillus salivarius ATCC 11741	0	0	0	0	0	0	0	0	0	0	0	0	0	0	0	0	0	0	0	0	0	0
Bacteria|Firmicutes|Bacilli|Lactobacillales|Lactobacillaceae|Lactobacillus|Lactobacillus salivarius|Lactobacillus salivarius CECT 5713	8	0	0	0	0	0	0	1	0	0	0	0	0	0	0	0	0	0	0	0	0	0
Bacteria|Firmicutes|Bacilli|Lactobacillales|Lactobacillaceae|Lactobacillus|Lactobacillus salivarius|Lactobacillus salivarius UCC118	4	0	1	1	0	0	0	1	0	0	0	0	0	0	0	0	0	0	0	0	0	0
Bacteria|Firmicutes|Bacilli|Lactobacillales|Lactobacillaceae|Lactobacillus|Lactobacillus sanfranciscensis|Lactobacillus sanfranciscensis TMW 1.1304	0	0	0	0	0	0	0	0	0	0	0	0	0	0	0	0	0	0	0	0	0	0
Bacteria|Firmicutes|Bacilli|Lactobacillales|Lactobacillaceae|Lactobacillus|Lactobacillus sp. 7_1_47FAA	0	0	0	0	0	0	0	0	0	0	0	0	0	0	0	0	0	0	0	0	0	0
Bacteria|Firmicutes|Bacilli|Lactobacillales|Lactobacillaceae|Lactobacillus|Lactobacillus suebicus|Lactobacillus suebicus KCTC 3549	0	0	0	1	0	3	0	0	1	0	0	0	0	0	0	0	0	0	0	0	0	0
Bacteria|Firmicutes|Bacilli|Lactobacillales|Lactobacillaceae|Lactobacillus|Lactobacillus ultunensis|Lactobacillus ultunensis DSM 16047	0	0	0	0	0	0	0	0	0	0	0	0	0	0	0	0	0	0	0	0	0	0
Bacteria|Firmicutes|Bacilli|Lactobacillales|Lactobacillaceae|Lactobacillus|Lactobacillus vaginalis|Lactobacillus vaginalis ATCC 49540	6	1	1	0	2	0	0	8	0	0	0	0	0	0	0	0	1	0	0	0	0	0
Bacteria|Firmicutes|Bacilli|Lactobacillales|Lactobacillaceae|Lactobacillus|Lactobacillus versmoldensis|Lactobacillus versmoldensis KCTC 3814	0	0	0	0	0	0	0	0	0	0	0	0	0	0	0	0	0	0	0	0	0	0
Bacteria|Firmicutes|Bacilli|Lactobacillales|Lactobacillaceae|Pediococcus|Pediococcus acidilactici|Pediococcus acidilactici 7_4	0	0	0	0	0	0	0	0	0	0	0	0	0	0	0	0	0	0	0	0	0	0
Bacteria|Firmicutes|Bacilli|Lactobacillales|Lactobacillaceae|Pediococcus|Pediococcus acidilactici|Pediococcus acidilactici DSM 20284	1	1	2	0	1	0	0	0	0	0	0	0	0	0	0	0	3	0	0	0	0	0
Bacteria|Firmicutes|Bacilli|Lactobacillales|Lactobacillaceae|Pediococcus|Pediococcus claussenii|Pediococcus claussenii ATCC BAA-344	2	0	2	0	0	0	0	0	0	0	0	0	0	0	0	0	1	0	0	0	0	0
Bacteria|Firmicutes|Bacilli|Lactobacillales|Lactobacillaceae|Pediococcus|Pediococcus pentosaceus|Pediococcus pentosaceus ATCC 25745	12	11	5	7	8	0	0	9	0	0	0	0	0	1	1	0	5	0	0	0	0	0
Bacteria|Firmicutes|Bacilli|Lactobacillales|Leuconostocaceae|Fructobacillus|Fructobacillus fructosus|Fructobacillus fructosus KCTC 3544	0	0	0	0	0	0	0	0	0	0	0	0	0	0	0	0	0	0	0	0	0	0
Bacteria|Firmicutes|Bacilli|Lactobacillales|Leuconostocaceae|Leuconostoc|Leuconostoc citreum|Leuconostoc citreum KM20	60	25	28	22	30	0	0	13	0	0	3	0	0	7	0	0	14	2	0	0	0	0
Bacteria|Firmicutes|Bacilli|Lactobacillales|Leuconostocaceae|Leuconostoc|Leuconostoc fallax|Leuconostoc fallax KCTC 3537	17	3	7	6	1	0	0	12	0	0	0	0	0	1	0	0	2	0	0	0	0	0
Bacteria|Firmicutes|Bacilli|Lactobacillales|Leuconostocaceae|Leuconostoc|Leuconostoc gasicomitatum|Leuconostoc gasicomitatum LMG 18811	7	1	1	1	0	0	0	2	0	0	0	0	0	0	0	0	0	0	0	0	0	0
Bacteria|Firmicutes|Bacilli|Lactobacillales|Leuconostocaceae|Leuconostoc|Leuconostoc gelidum|Leuconostoc gelidum KCTC 3527	2	0	0	1	0	0	0	0	0	0	0	0	0	0	0	0	0	0	0	0	0	0
Bacteria|Firmicutes|Bacilli|Lactobacillales|Leuconostocaceae|Leuconostoc|Leuconostoc inhae|Leuconostoc inhae KCTC 3774	3	0	2	0	0	0	1	0	0	0	1	0	0	0	0	0	0	0	0	0	0	0
Bacteria|Firmicutes|Bacilli|Lactobacillales|Leuconostocaceae|Leuconostoc|Leuconostoc kimchii|Leuconostoc kimchii IMSNU 11154	0	1	2	1	0	0	0	0	0	0	0	0	0	1	0	0	0	0	0	0	0	0
Bacteria|Firmicutes|Bacilli|Lactobacillales|Leuconostocaceae|Leuconostoc|Leuconostoc lactis|Leuconostoc argentinum KCTC 3773	8	4	1	0	3	0	1	3	0	0	0	0	1	0	0	0	2	0	0	0	0	0
Bacteria|Firmicutes|Bacilli|Lactobacillales|Leuconostocaceae|Leuconostoc|Leuconostoc lactis|Leuconostoc lactis KCTC 3528 = DSM 20202	0	0	0	0	0	0	0	0	0	0	0	0	0	0	0	0	0	0	0	0	0	0
Bacteria|Firmicutes|Bacilli|Lactobacillales|Leuconostocaceae|Leuconostoc|Leuconostoc mesenteroides|Leuconostoc mesenteroides subsp. cremoris|Leuconostoc mesenteroides subsp. cremoris ATCC 19254	0	0	1	0	2	0	0	0	0	0	0	0	0	0	0	0	0	0	0	0	0	0
Bacteria|Firmicutes|Bacilli|Lactobacillales|Leuconostocaceae|Leuconostoc|Leuconostoc mesenteroides|Leuconostoc mesenteroides subsp. mesenteroides|Leuconostoc mesenteroides subsp. mesenteroides ATCC 8293	10	5	0	1	1	0	0	0	0	0	0	1	0	0	0	0	0	0	0	0	0	0
Bacteria|Firmicutes|Bacilli|Lactobacillales|Leuconostocaceae|Leuconostoc|Leuconostoc mesenteroides|Leuconostoc mesenteroides subsp. mesenteroides|Leuconostoc mesenteroides subsp. mesenteroides J18	24	7	8	16	7	0	0	9	0	0	0	0	0	2	0	0	5	0	0	0	0	0
Bacteria|Firmicutes|Bacilli|Lactobacillales|Leuconostocaceae|Leuconostoc|Leuconostoc pseudomesenteroides|Leuconostoc pseudomesenteroides KCTC 3652	65	21	44	29	34	1	0	12	1	0	6	0	0	4	0	0	9	6	1	0	0	0
Bacteria|Firmicutes|Bacilli|Lactobacillales|Leuconostocaceae|Leuconostoc|Leuconostoc sp. C2	0	0	0	0	0	0	0	0	0	0	0	0	0	0	0	0	0	0	0	0	0	0
Bacteria|Firmicutes|Bacilli|Lactobacillales|Leuconostocaceae|Oenococcus|Oenococcus kitaharae|Oenococcus kitaharae DSM 17330	1	1	0	0	0	0	0	0	0	0	0	0	0	0	0	0	0	0	0	0	0	0
Bacteria|Firmicutes|Bacilli|Lactobacillales|Leuconostocaceae|Oenococcus|Oenococcus oeni|Oenococcus oeni ATCC BAA-1163	0	0	0	0	0	0	0	0	0	0	0	0	0	0	0	0	0	0	0	0	0	0
Bacteria|Firmicutes|Bacilli|Lactobacillales|Leuconostocaceae|Oenococcus|Oenococcus oeni|Oenococcus oeni AWRIB429	0	0	0	0	0	0	0	0	0	0	0	0	0	0	0	0	0	0	0	0	0	0
Bacteria|Firmicutes|Bacilli|Lactobacillales|Leuconostocaceae|Oenococcus|Oenococcus oeni|Oenococcus oeni PSU-1	1	0	0	0	0	0	0	0	0	0	0	0	0	0	0	0	0	0	0	0	0	0
Bacteria|Firmicutes|Bacilli|Lactobacillales|Leuconostocaceae|Weissella|Weissella cibaria|Weissella cibaria KACC 11862	253	109	115	66	113	0	1	224	0	1	11	1	0	21	0	0	53	17	0	0	0	0
Bacteria|Firmicutes|Bacilli|Lactobacillales|Leuconostocaceae|Weissella|Weissella koreensis|Weissella koreensis KACC 15510	1	0	0	0	0	0	0	0	0	0	0	0	0	0	0	0	0	0	0	0	0	0
Bacteria|Firmicutes|Bacilli|Lactobacillales|Leuconostocaceae|Weissella|Weissella paramesenteroides|Weissella paramesenteroides ATCC 33313	118	42	57	31	32	1	0	5	0	0	2	1	0	4	0	0	9	1	0	0	0	0
Bacteria|Firmicutes|Bacilli|Lactobacillales|Streptococcaceae|Lactococcus|Lactococcus garvieae|Lactococcus garvieae 21881	52	8	7	1	4	0	2	15	1	0	1	0	0	0	0	0	20	0	0	0	0	0
Bacteria|Firmicutes|Bacilli|Lactobacillales|Streptococcaceae|Lactococcus|Lactococcus garvieae|Lactococcus garvieae ATCC 49156	0	1	0	0	0	0	0	0	0	0	0	0	0	0	0	0	0	0	0	0	0	0
Bacteria|Firmicutes|Bacilli|Lactobacillales|Streptococcaceae|Lactococcus|Lactococcus garvieae|Lactococcus garvieae Lg2	0	0	0	0	0	0	0	0	0	0	0	0	0	0	0	0	0	0	0	0	0	0
Bacteria|Firmicutes|Bacilli|Lactobacillales|Streptococcaceae|Lactococcus|Lactococcus lactis|Lactococcus lactis subsp. cremoris|Lactococcus lactis subsp. cremoris A76	431	258	135	53	64	6	1	66	1	1	1	3	0	3	0	0	170	5	6	1	0	1
Bacteria|Firmicutes|Bacilli|Lactobacillales|Streptococcaceae|Lactococcus|Lactococcus lactis|Lactococcus lactis subsp. cremoris|Lactococcus lactis subsp. cremoris MG1363	0	0	0	0	0	0	0	0	0	0	0	0	0	0	0	0	0	0	0	0	0	0
Bacteria|Firmicutes|Bacilli|Lactobacillales|Streptococcaceae|Lactococcus|Lactococcus lactis|Lactococcus lactis subsp. cremoris|Lactococcus lactis subsp. cremoris NZ9000	0	0	0	0	0	0	0	0	0	0	0	0	0	0	0	0	0	0	0	0	0	0
Bacteria|Firmicutes|Bacilli|Lactobacillales|Streptococcaceae|Lactococcus|Lactococcus lactis|Lactococcus lactis subsp. cremoris|Lactococcus lactis subsp. cremoris SK11	16	7	9	1	1	0	0	0	0	0	0	0	0	0	0	0	3	0	0	0	0	1
Bacteria|Firmicutes|Bacilli|Lactobacillales|Streptococcaceae|Lactococcus|Lactococcus lactis|Lactococcus lactis subsp. lactis|Lactococcus lactis subsp. lactis CV56	129	43	35	15	21	2	0	30	0	1	0	1	0	2	0	0	54	1	0	1	0	1
Bacteria|Firmicutes|Bacilli|Lactobacillales|Streptococcaceae|Lactococcus|Lactococcus lactis|Lactococcus lactis subsp. lactis|Lactococcus lactis subsp. lactis Il1403	41	27	11	22	20	1	0	17	0	0	2	1	0	6	0	0	30	0	0	0	0	0
Bacteria|Firmicutes|Bacilli|Lactobacillales|Streptococcaceae|Lactococcus|Lactococcus lactis|Lactococcus lactis subsp. lactis|Lactococcus lactis subsp. lactis KF147	8	4	8	6	5	1	0	1	0	0	0	0	0	0	0	0	4	0	0	0	0	0
Bacteria|Firmicutes|Bacilli|Lactobacillales|Streptococcaceae|Streptococcus|Streptococcus agalactiae|Streptococcus agalactiae 18RS21	0	0	0	0	0	0	0	0	0	0	0	0	0	0	0	0	0	0	0	0	0	0
Bacteria|Firmicutes|Bacilli|Lactobacillales|Streptococcaceae|Streptococcus|Streptococcus agalactiae|Streptococcus agalactiae 515	0	0	0	0	0	0	0	0	0	0	0	0	0	0	0	0	0	0	0	0	0	0
Bacteria|Firmicutes|Bacilli|Lactobacillales|Streptococcaceae|Streptococcus|Streptococcus agalactiae|Streptococcus agalactiae ATCC 13813	356	247	232	69	26	1	1	79	0	0	3	1	0	8	0	0	191	3	6	0	1	3
Bacteria|Firmicutes|Bacilli|Lactobacillales|Streptococcaceae|Streptococcus|Streptococcus agalactiae|Streptococcus agalactiae CCUG 19094	0	0	0	0	0	0	0	0	0	0	0	0	0	0	0	0	0	0	0	0	0	0
Bacteria|Firmicutes|Bacilli|Lactobacillales|Streptococcaceae|Streptococcus|Streptococcus agalactiae|Streptococcus agalactiae CCUG 24810	0	0	0	0	0	0	0	0	0	0	0	0	0	0	0	0	0	0	0	0	0	0
Bacteria|Firmicutes|Bacilli|Lactobacillales|Streptococcaceae|Streptococcus|Streptococcus agalactiae|Streptococcus agalactiae CCUG 25532	1	0	0	0	0	0	0	0	0	0	0	0	0	0	0	0	0	0	0	0	0	0
Bacteria|Firmicutes|Bacilli|Lactobacillales|Streptococcaceae|Streptococcus|Streptococcus agalactiae|Streptococcus agalactiae CCUG 37430	0	0	0	0	0	0	0	0	0	0	0	0	0	0	0	0	0	0	0	0	0	0
Bacteria|Firmicutes|Bacilli|Lactobacillales|Streptococcaceae|Streptococcus|Streptococcus agalactiae|Streptococcus agalactiae CCUG 37737	0	0	0	0	0	0	0	0	0	0	0	0	0	0	0	0	0	0	0	0	0	0
Bacteria|Firmicutes|Bacilli|Lactobacillales|Streptococcaceae|Streptococcus|Streptococcus agalactiae|Streptococcus agalactiae CCUG 37738	1	1	1	0	0	0	0	0	0	0	0	0	0	0	0	0	0	0	0	0	0	0
Bacteria|Firmicutes|Bacilli|Lactobacillales|Streptococcaceae|Streptococcus|Streptococcus agalactiae|Streptococcus agalactiae CCUG 37741	0	0	0	0	0	0	0	0	0	0	0	0	0	0	0	0	0	0	0	0	0	0
[truncated: 3,382 more rows]
